# Supplementary material for: Sustainable preparation of photoactive indole-fused tetracyclic molecules: a new class of organophotocatalysts
Source: Royal Society of Chemistry journal article supplement (doi:10.1039/d2gc00542e), 2022-01-01

# **Sustainable Preparation of Photoactive Indole-fused Tetracyclic Molecules: A New Class of Organophotocatalysts**

Jaehahn Bae, Naeem Iqbal, Ho Seong Hwang, and Eun Jin Cho\*

Department of Chemistry, Chung-Ang University, 84 Heukseok-ro, Dongjak-gu,  
Seoul 06974, Republic of Korea  
E-mail: ejcho@cau.ac.kr (E. J. Cho)

## **Supporting Information**

|                                                                                     |      |
|-------------------------------------------------------------------------------------|------|
| <b>General Considerations</b>                                                       | S-1  |
| <b>Table S1: Full Optimization Table</b>                                            | S-2  |
| <b>Proposed Mechanism</b>                                                           | S-3  |
| <b>Computational Details</b>                                                        | S-4  |
| <b>Electrochemical and Photophysical Properties</b>                                 | S-8  |
| <b>Photographs of Preparation Process</b>                                           | S-23 |
| <b>Structure Determination by NMR Spectra</b>                                       | S-24 |
| <b>Synthesis of Substrates</b>                                                      | S-27 |
| <b>Analytic Data for Substrates</b>                                                 | S-27 |
| <b>Synthesis of 11-Arylvinyl-6<i>H</i>-Isoindolo[2,1-<i>a</i>]indol-6-ones</b>      | S-31 |
| <b>Analytic Data for 11-Arylvinyl-6<i>H</i>-Isoindolo[2,1-<i>a</i>]indol-6-ones</b> | S-32 |
| <b>Applications</b>                                                                 | S-43 |
| <b>Crystal Structure Data</b>                                                       | S-49 |
| <b>References</b>                                                                   | S-59 |
| <b>NMR Spectra (<sup>1</sup>H NMR and <sup>13</sup>C NMR)</b>                       | S-60 |

## General Considerations

### General reagent information

All commercially available reagents including nickel acetate tetrahydrate, arylboronic acids, 2-iodoanilines, phthalic anhydrides, and 2,2,2-trifluoroethanol were purchased from Sigma-Aldrich, Alfa Aesar, Combi blocks or TCI chemical companies and used without further purification. 2-(2-(Diphenylphosphino)ethyl)pyridine (PyPhos) was synthesized according to the known procedure.<sup>51</sup> Flash column chromatography was performed using ZEOCHEM ZEOprep silica gel 60 (60-200 mesh).

### General analytical information

The synthesized phthalimide substrates (**1**) and indole-fused polycyclic products (**3**, **5**) were characterized by <sup>1</sup>H NMR, <sup>13</sup>C NMR, and FT-IR spectroscopy. NMR spectra were recorded on a Varian 600 MHz instrument (600 MHz for <sup>1</sup>H NMR, and 151 MHz for <sup>13</sup>C NMR). Copies of <sup>1</sup>H and <sup>13</sup>C NMR spectra can be found at the end of the Supporting Information. <sup>1</sup>H NMR experiments are reported in units, parts per million (ppm), and were measured relative to residual chloroform (7.26 ppm) in the deuterated solvent. <sup>13</sup>C NMR spectra are reported in ppm relative to deuteriochloroform (77.23 ppm), and all were obtained with <sup>1</sup>H decoupling. Coupling constants were reported in Hz. FT-IR spectra were recorded on a Nicolet 6700 Thermo Scientific FT-IR spectrometer. Reactions were monitored by GC-MS of the crude reaction mixture using dodecane as internal standard and products were detected by GC-MS using the Agilent GC 7890B/5977A inert MSD with Triple-Axis Detector. Mass spectral data of all unknown compounds were acquired at the Korea Basic Science Institute (Daegu) on a Jeol JMS 700 high-resolution mass spectrometer. A quadrupole mass analyzer was used for HRMS measurements. Melting points of unknown compounds were recorded on a Stuart SMP30 apparatus. Single crystal X-ray diffraction data were collected in Bruker-AXS SMART BREEZE X-ray diffractometers. The structures were solved with direct methods using the SHELXL programs. UV-Vis spectra were recorded on a Scinco S-3100 spectrophotometer equipped with a Peltier temperature controller. UV-Vis spectra for Stern-Volmer quenching studies were recorded using PerkinElmer Lambda 25 UV-Vis spectroscopy. Fluorescence spectra were obtained on a PTI QuantaMaster steady-state spectrofluorometer.

**Table S1: Full Optimization Table<sup>a</sup>**

$\text{1a} + \text{2a} \xrightarrow[\text{TFE (0.1 M), 80 }^\circ\text{C, 14 h}]{\text{Ni(OAc)}_2 \cdot 4\text{H}_2\text{O (10 mol\%)} \text{ Ligand (12 mol\%)}}$

**L1**

**L2**

**L3**

**L4**

**L5**

**L6**

**L7**

**L8**

**L9**

**L10**

| Entry | Ni(OAc) <sub>2</sub> ·4H <sub>2</sub> O<br>(X mol%) | Solvent | Ligand | Variations <sup>b</sup> | Yield <sup>c</sup> |
|-------|-----------------------------------------------------|---------|--------|-------------------------|--------------------|
| 1     | 10 mol%                                             | TFE     | L1     | -                       | trace              |
| 2     | 10 mol%                                             | TFE     | L2     | -                       | trace              |
| 3     | 10 mol%                                             | TFE     | L3     | -                       | trace              |
| 4     | 10 mol%                                             | TFE     | L4     | -                       | trace              |
| 5     | 10 mol%                                             | TFE     | L5     | -                       | trace              |
| 6     | 10 mol%                                             | TFE     | L6     | -                       | trace              |
| 7     | 10 mol%                                             | TFE     | L7     | -                       | trace              |
| 8     | 10 mol%                                             | TFE     | L8     | -                       | 18                 |
| 9     | 10 mol%                                             | TFE     | L9     | -                       | N.R                |
| 10    | 10 mol%                                             | TFE     | L10    | -                       | 91                 |
| 11    | 10 mol%                                             | MeCN    | L10    | -                       | 21                 |
| 12    | 10 mol%                                             | DMF     | L10    | -                       | 10                 |
| 13    | 10 mol%                                             | Dioxane | L10    | -                       | 9                  |
| 14    | 10 mol%                                             | THF     | L10    | -                       | 17                 |
| 15    | 10 mol%                                             | EtOH    | L10    | -                       | trace              |
| 16    | -                                                   | TFE     | L10    | Cu(OAc) <sub>2</sub>    | N.R                |
| 17    | -                                                   | TFE     | L10    | Pd(OAc) <sub>2</sub>    | N.R                |
| 18    | -                                                   | TFE     | L10    | Ni(Cp) <sub>2</sub>     | trace              |
| 19    | -                                                   | TFE     | L10    | Ni(acac) <sub>2</sub>   | 41                 |
| 20    | -                                                   | TFE     | L10    | NiBr <sub>2</sub>       | 52                 |
| 21    | -                                                   | TFE     | L10    | Ni(COD) <sub>2</sub>    | 90                 |
| 22    | 10 mol%                                             | TFE     | L10    | 23 °C                   | 7                  |
| 23    | 10 mol%                                             | TFE     | L10    | 40 °C                   | 15                 |
| 24    | 10 mol%                                             | TFE     | L10    | 60 °C                   | 55                 |
| 25    | 5 mol%                                              | TFE     | L10    | -                       | 91                 |
| 26    | 3 mol%                                              | TFE     | L10    | -                       | 77                 |
| 27    | -                                                   | TFE     | L10    | -                       | N.R                |
| 28    | 5 mol%                                              | TFE     | -      | -                       | N.R                |
| 29    | 5 mol%                                              | TFE     | L10    | Under air               | 43                 |

<sup>a</sup>All reactions were carried out at 0.1 mmol scale. <sup>b</sup>Varied catalysts in 10 mol% loading. <sup>c</sup>GC yield using dodecane as an internal standard. N.R: no reaction.

## Proposed Mechanism

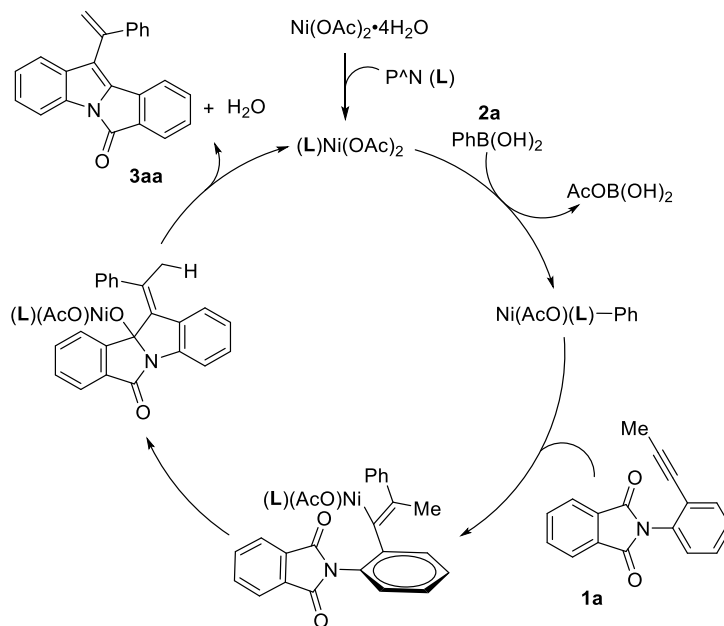

**Scheme S1.** Proposed mechanism



## Computational Details

All calculations were performed by using the density functional theory (DFT) and time dependent-density functional theory (TD-DFT) with the GAUSSIAN 09 program package.<sup>S2</sup> For the calculation of geometry optimizations, CAM-B3LYP<sup>S3</sup> functional with 6-31G\* basis set was used. Frequency calculation was performed for all stationary points to confirm the local minima, thermodynamic parameters including Gibbs free energies at 298 K. After geometry optimization, TD-DFT calculation was conducted using same functional and basis set. For TD calculation, solvent effects were considered at the polarizable continuum model (PCM) method<sup>S4</sup> in acetonitrile solvent ( $\epsilon = 35.7$ ). All optimized structures, molecular orbitals and electrostatic potential were visualized by CYLview<sup>S5</sup> and GaussView.<sup>S2</sup>

## HOMO/LUMO orbital

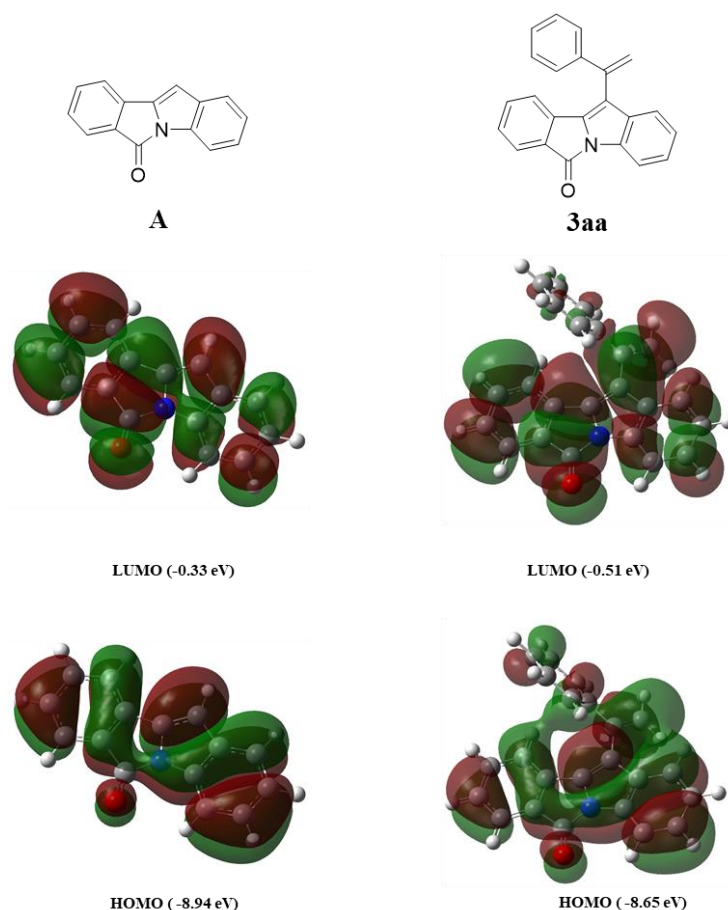

**Figure S1.** Comparison of HOMO/LUMO of **A** and **3aa**

## Excited states and oscillator strengths of **3aa**

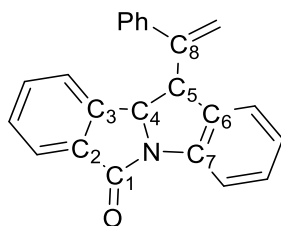

| Bonds                          | Ground state | Excited state |
|--------------------------------|--------------|---------------|
| C <sub>1</sub> -O              | 1.21         | 1.24          |
| C <sub>1</sub> -C <sub>2</sub> | 1.49         | 1.44          |
| C <sub>2</sub> -C <sub>3</sub> | 1.41         | 1.45          |
| C <sub>3</sub> -C <sub>4</sub> | 1.47         | 1.40          |
| C <sub>4</sub> -C <sub>5</sub> | 1.37         | 1.44          |
| C <sub>5</sub> -C <sub>6</sub> | 1.46         | 1.41          |
| C <sub>6</sub> -C <sub>7</sub> | 1.41         | 1.45          |
| C <sub>5</sub> -C <sub>8</sub> | 1.47         | 1.46          |

**Figure S2.** Bond length changes of ground state & excited state **3aa**.

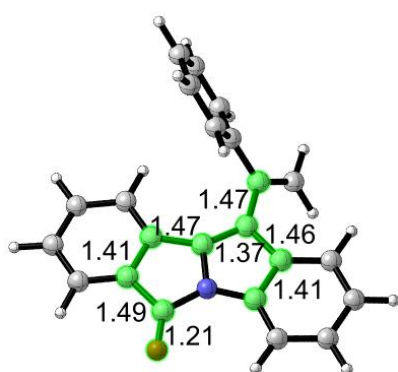

Optimized ground state structure

3.4674 eV (357.57 nm)  $f=0.4638$   
HOMO-1  $\rightarrow$  LUMO 0.25028  
HOMO  $\rightarrow$  LUMO 0.65200

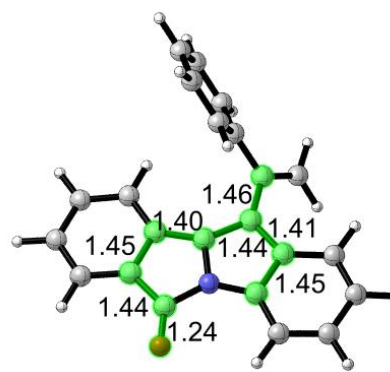

Optimized excited state structure

2.5715 eV (482.14 nm)  $f=0.3155$   
HOMO-1  $\rightarrow$  LUMO 0.20413  
HOMO  $\rightarrow$  LUMO 0.67037

**Figure S3.** Results of TD-DFT calculation for **3aa**.

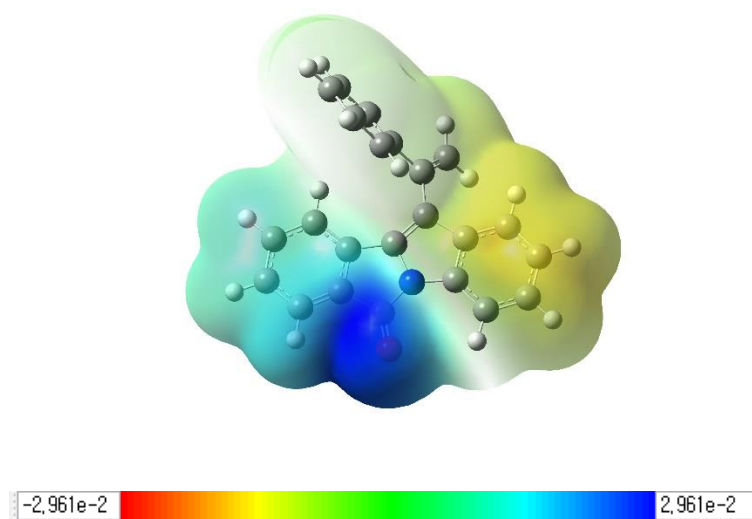

**Figure S4.** Isosurface of the ground state electron density, color mapped using the value of the difference density between the excited state and ground state. Isosurface of 0.0004 was used. The blue region indicates that the electron density in the excited state is larger than it is in the ground state.

### Cartesian coordinates and energies of all optimized geometries

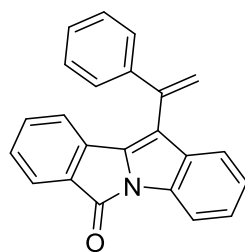

**3aa**

E(CAM-B3LYP/6-31G(d)) = -1014.92030655 a.u.

|   |             |             |             |   |             |             |             |
|---|-------------|-------------|-------------|---|-------------|-------------|-------------|
| O | -2.52297900 | 3.06272900  | 0.33381300  | C | 3.23034500  | -1.08306000 | 1.81834900  |
| N | -1.64790300 | 0.93694000  | 0.01347500  | H | 3.32222100  | -0.69561900 | 2.83412400  |
| C | 2.98308300  | -2.07446600 | -0.77234500 | C | 0.21339200  | -3.09501400 | -1.37804900 |
| H | 2.88401100  | -2.43574300 | -1.79766000 | H | -0.75985800 | -3.22488400 | -1.85368500 |
| C | 1.82733800  | -1.80335600 | -0.02727900 | C | 4.37441900  | -1.34884500 | 1.06570300  |
| C | -0.40988600 | 0.34960200  | -0.23775200 | H | 5.36360700  | -1.16631600 | 1.48841500  |
| C | 2.55493400  | 2.76036200  | -0.57570500 | C | 1.83686400  | 3.93727300  | -0.34945100 |
| H | 3.62795200  | 2.81731700  | -0.76495100 | H | 2.35435800  | 4.89716800  | -0.36401900 |
| C | 1.96732800  | -1.30423300 | 1.27539800  | C | -1.59485300 | 2.33320900  | 0.11858400  |
| H | 1.07353900  | -1.08273000 | 1.86187100  | C | 1.93754300  | 1.50490900  | -0.56701000 |
| C | 0.46095400  | 3.88719400  | -0.10932500 | H | 2.52203000  | 0.60376300  | -0.74849400 |
| H | -0.13014500 | 4.78735500  | 0.06691800  | C | -0.56220900 | -1.01353900 | -0.33362600 |
| C | 4.24706900  | -1.84734400 | -0.23087600 | C | 0.56688800  | 1.44920100  | -0.32179600 |
| C | 0.47613300  | -2.02059300 | -0.61493500 | C | -2.62896400 | -0.03294500 | 0.09897900  |
|   |             |             |             | C | -0.14749400 | 2.64374000  | -0.10105300 |
|   |             |             |             | H | 5.13685000  | -2.05273900 | -0.82825400 |
|   |             |             |             | H | 0.97238800  | -3.86128300 | -1.54588400 |
|   |             |             |             | C | -2.74912200 | -2.44903500 | -0.02918500 |
|   |             |             |             | C | -3.99345600 | 0.08787400  | 0.35446100  |
|   |             |             |             | C | -1.98528100 | -1.27666300 | -0.11113500 |
|   |             |             |             | C | -4.11221800 | -2.34329900 | 0.22633100  |
|   |             |             |             | C | -4.72699100 | -1.09287200 | 0.40819300  |
|   |             |             |             | H | -4.44478800 | 1.06758400  | 0.50691000  |
|   |             |             |             | H | -5.79922700 | -1.04728300 | 0.60371500  |
|   |             |             |             | H | -4.71683800 | -3.24892100 | 0.28965400  |
|   |             |             |             | H | -2.28183800 | -3.42667400 | -0.15233300 |

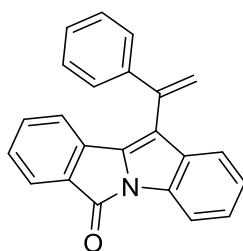

**3aa\***

E(CAM-B3LYP/6-31G(d)) = -1014.80940485 a.u.

|   |             |             |             |
|---|-------------|-------------|-------------|
| O | -0.57438794 | 0.26365348  | 0.00000000  |
| N | 0.59437606  | -1.73134052 | -0.37869700 |
| C | 5.53084306  | -4.32672452 | -1.22569900 |
| H | 5.49341006  | -4.60685652 | -2.27363200 |
| C | 4.33732306  | -4.18197652 | -0.51076100 |
| C | 1.90816906  | -2.15829452 | -0.68067300 |
| C | 4.53619706  | 0.50074448  | -1.09193200 |
| H | 5.58060306  | 0.68935848  | -1.31560400 |
| C | 4.40338406  | -3.78712152 | 0.82931300  |
| H | 3.48592506  | -3.67274052 | 1.39813800  |
| C | 2.33688006  | 1.41883448  | -0.53632300 |
| H | 1.68660906  | 2.26432448  | -0.33613000 |
| C | 6.75700606  | -4.08912952 | -0.61553800 |
| C | 3.02347606  | -4.45393352 | -1.15708000 |
| C | 5.62887106  | -3.55155452 | 1.44020000  |
| H | 5.66120206  | -3.25129652 | 2.48287500  |
| C | 2.87744106  | -5.47982552 | -2.01265700 |
| H | 1.94615406  | -5.65426352 | -2.53984900 |
| C | 6.81000106  | -3.70060452 | 0.71959700  |
| H | 7.76711106  | -3.51058752 | 1.19499300  |
| C | 3.67768606  | 1.60211348  | -0.82487400 |
| H | 4.08934406  | 2.60599848  | -0.84953700 |
| C | 0.48087306  | -0.33026752 | -0.25701300 |
| C | 4.06781906  | -0.78963352 | -1.06793900 |
| H | 4.72922306  | -1.62446152 | -1.26741600 |
| C | 1.89189306  | -3.58924552 | -0.82073000 |
| C | 2.69853906  | -1.01096552 | -0.77497800 |
| C | -0.23522494 | -2.79871352 | -0.32099300 |
| C | 1.82888706  | 0.12253148  | -0.50906600 |
| H | 7.67282406  | -4.19945352 | -1.18783900 |
| H | 3.69383206  | -6.16507152 | -2.21436100 |
| H | -0.65705200 | -2.89663000 | -0.00075900 |

|   |             |             |             |
|---|-------------|-------------|-------------|
| C | -0.09186194 | -5.23992952 | -0.54794000 |
| C | -1.60658694 | -2.85478052 | -0.04875900 |
| C | 0.55865206  | -3.97603252 | -0.59516000 |
| C | -1.43202694 | -5.28390552 | -0.27570300 |
| C | -2.19096394 | -4.09960352 | -0.03589300 |
| H | -2.16149794 | -1.94536952 | 0.14337900  |
| H | -3.25195994 | -4.19104552 | 0.17096100  |
| H | -1.93910394 | -6.24201652 | -0.23299800 |
| H | 0.47351906  | -6.14892952 | -0.71560900 |

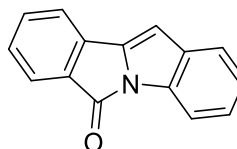

**A**

E(CAM-B3LYP/6-31G(d)) = -706.63853669 a.u.

|   |             |             |             |
|---|-------------|-------------|-------------|
| O | 0.43487300  | 2.57173100  | -0.00036900 |
| N | -0.32370100 | 0.38576600  | 0.00191500  |
| C | 0.22039900  | -0.89218100 | 0.00126700  |
| C | 4.03996900  | -1.13479500 | -0.00037000 |
| H | 4.87913000  | -1.82735900 | -0.00046900 |
| C | 3.23435900  | 1.15564900  | -0.00090700 |
| H | 3.40135700  | 2.23098000  | -0.00141300 |
| C | 4.29010700  | 0.23909900  | -0.00103800 |
| H | 5.31701900  | 0.59760800  | -0.00164100 |
| C | 0.63957500  | 1.39817300  | 0.00034300  |
| C | 2.73623100  | -1.64112000 | 0.00045800  |
| H | 2.55004500  | -2.71254100 | 0.00103100  |
| C | -0.77178000 | -1.81889500 | 0.00007700  |
| C | 1.68996200  | -0.73030300 | 0.00056200  |
| C | -1.70323400 | 0.30528900  | 0.00086600  |
| C | 1.94909000  | 0.64618900  | -0.00013400 |
| C | -3.37383700 | -1.45081000 | -0.00094800 |
| C | -2.66966700 | 1.31229300  | 0.00069600  |
| C | -2.02503800 | -1.07095600 | 0.00006600  |
| C | -4.34396300 | -0.46043900 | -0.00123400 |
| C | -3.99477600 | 0.90339100  | -0.00039000 |
| H | -2.37783900 | 2.35894800  | 0.00128600  |
| H | -4.78286700 | 1.65343500  | -0.00062700 |
| H | -5.39548900 | -0.73917800 | -0.00215900 |
| H | -3.65175600 | -2.50298000 | -0.00160000 |

## Electrochemical and Photochemical Properties

### Cyclic voltammetry studies

The ground-state oxidation ( $E_{ox}$ ) and reduction ( $E_{red}$ ) potentials of products were determined by cyclic voltammetry. 2.0 mM of sample was dissolved in 5 mL of dry and degassed acetonitrile (MeCN) solution containing 0.10 M tetrabutylammonium hexafluorophosphate (TBAPF<sub>6</sub>). The solution was delivered to a three-electrode cell assembly and deaerated. A glassy carbon working electrode, a coiled Pt wire counter electrode, and 1.0 M KCl Ag/AgCl pseudo reference electrode were employed for the voltammetric measurements. Voltammograms were measured at a scan rate of 100 mV·s<sup>-1</sup>. Reductions were measured by scanning potentials in negative direction. The obtained value was referenced to Ag/AgCl and converted to SCE by subtracting 0.03 V.

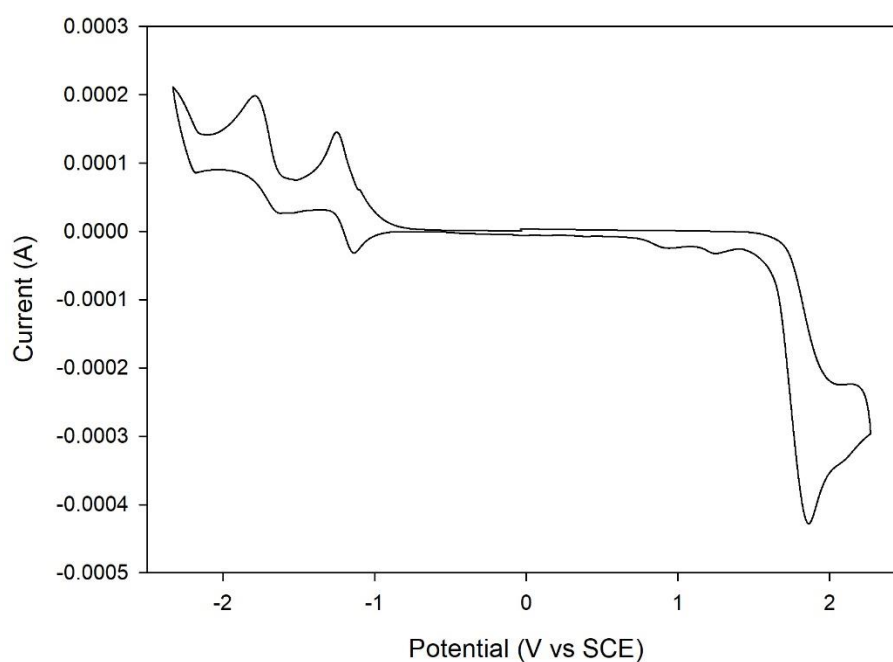

**3aa**

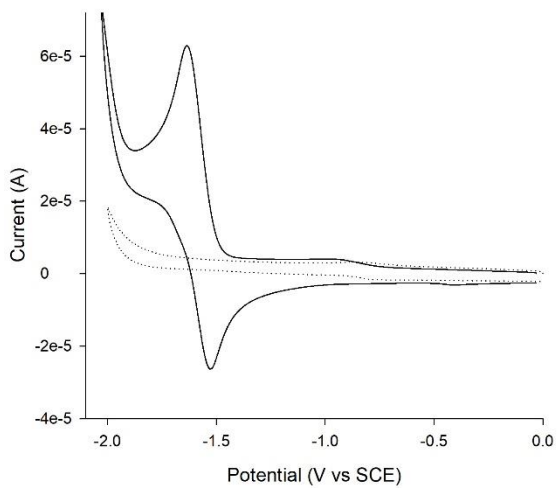

**3ba**

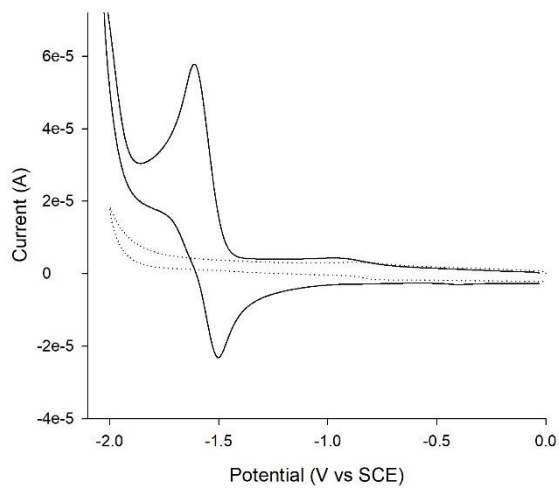

**3ca**

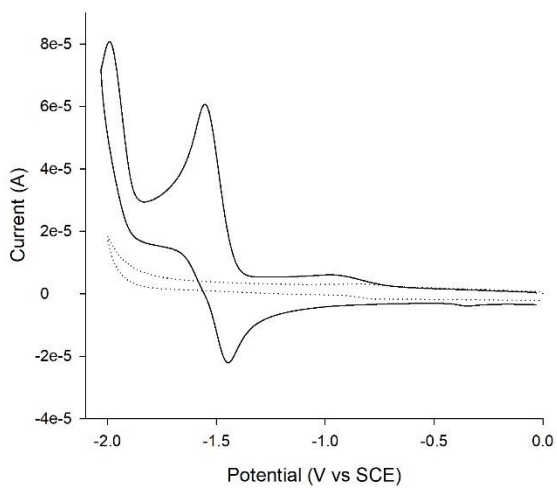

**3da**

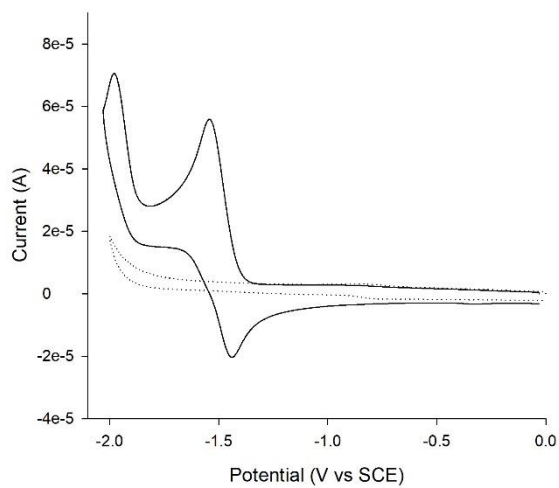

**3ea**

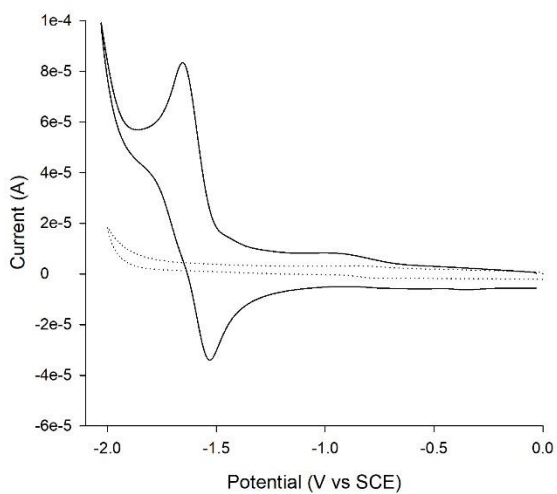

**3fa**

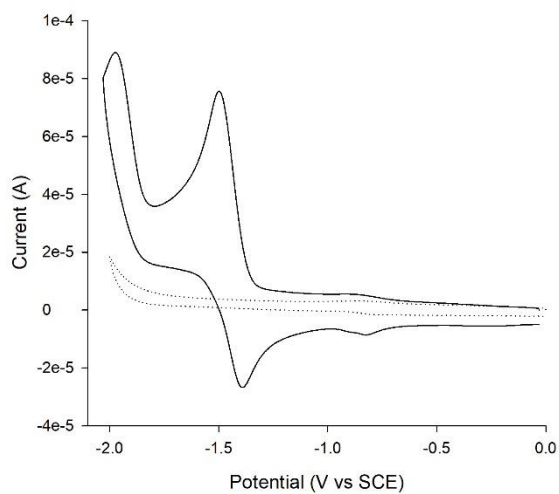

**3ga**

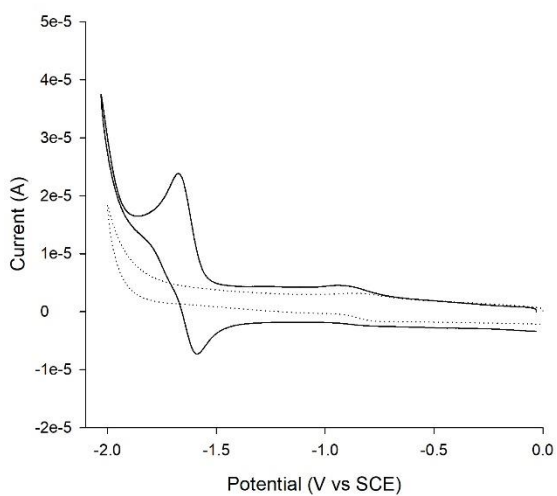

**3ha**

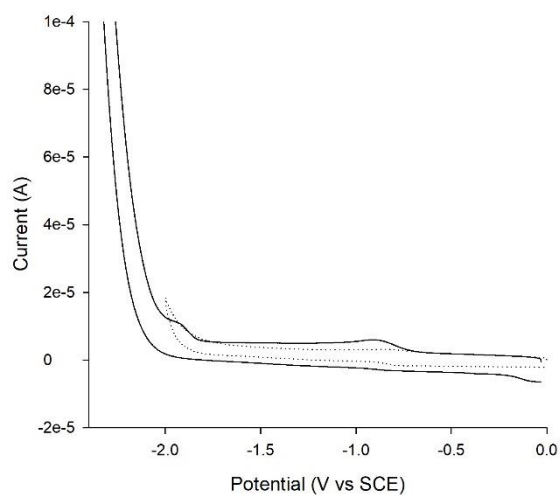

**3ia**

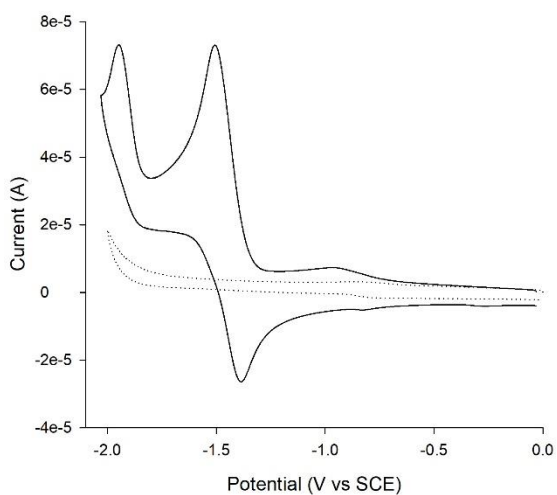

**3ja**

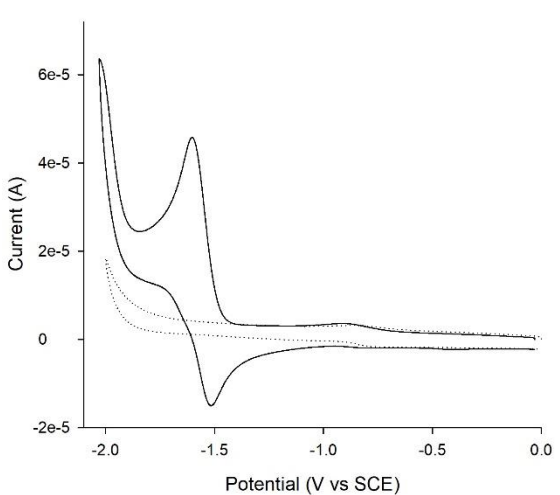

**3ab**

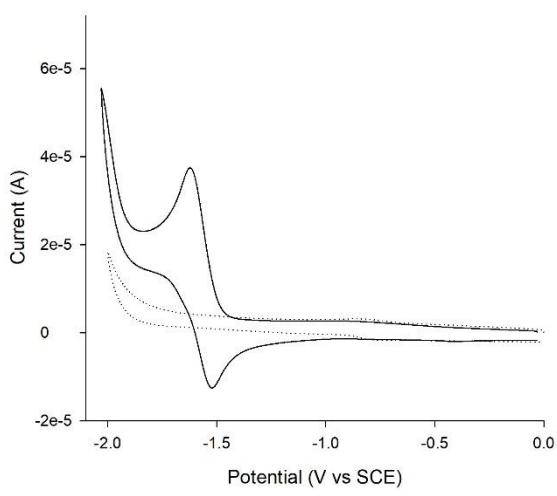

**3ac**

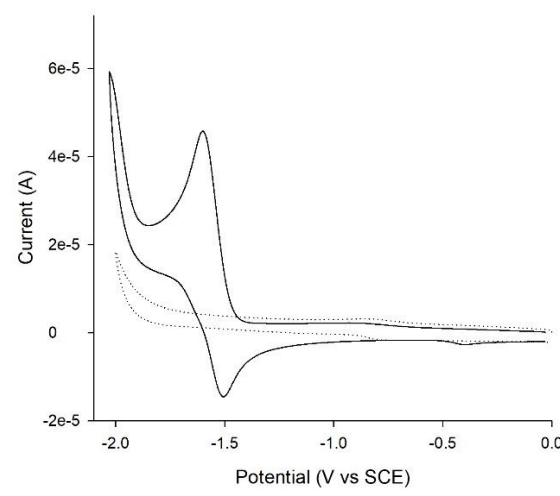

**3ad**

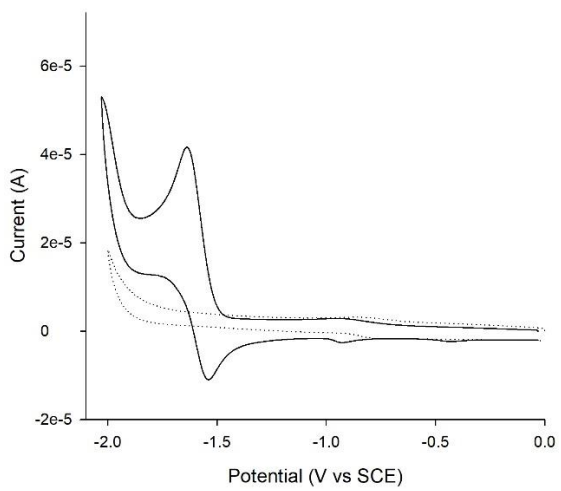

**3ae**

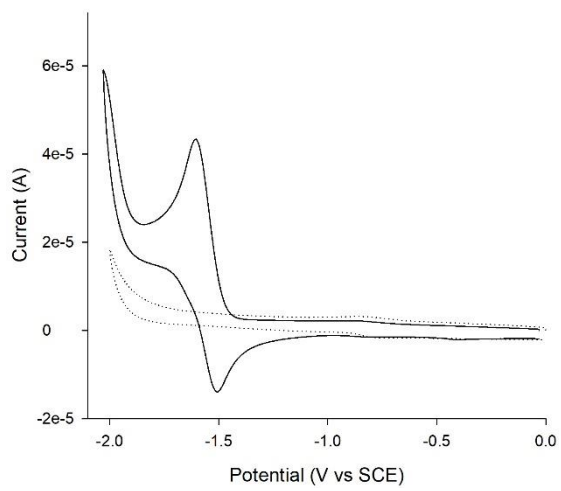

**3af**

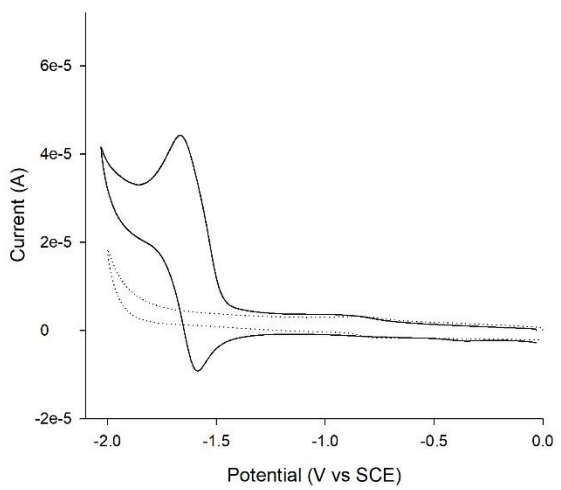

**3ag**

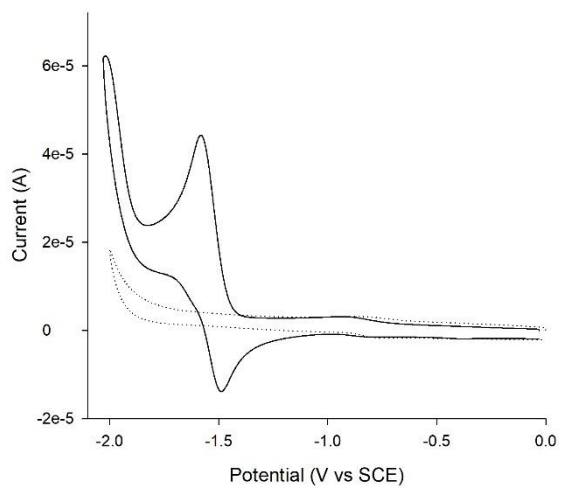

**3ah**

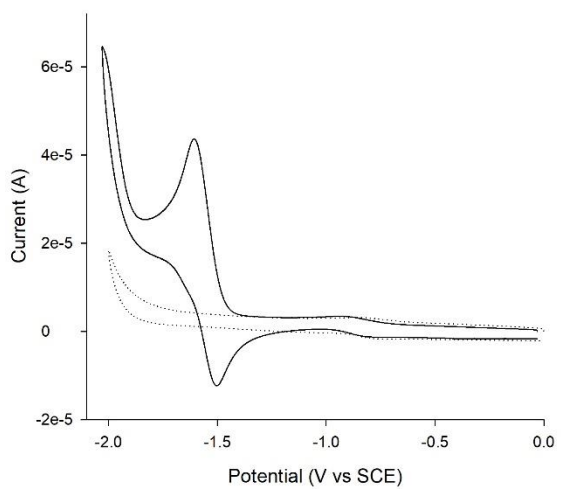

**3ai**

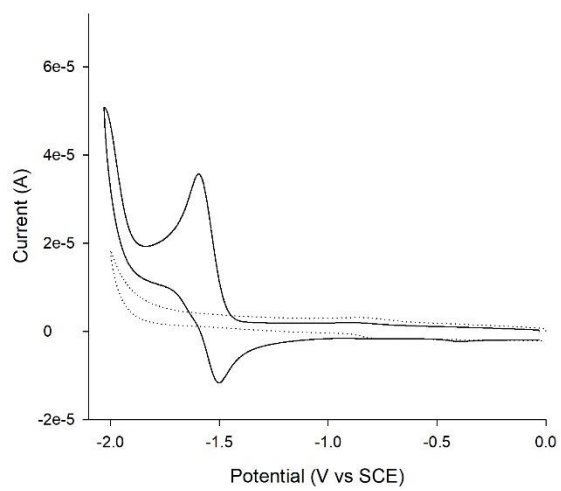

**3aj**



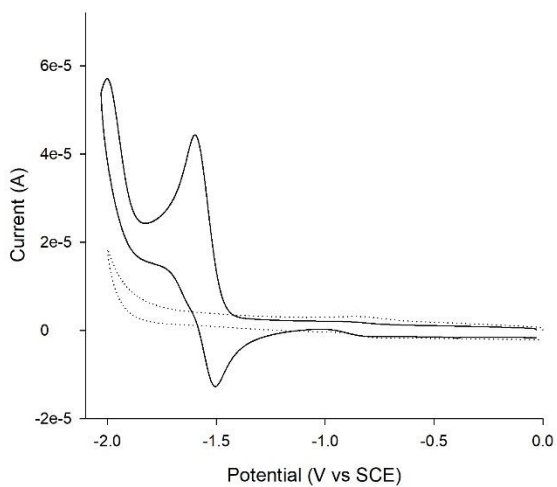

**3ak**

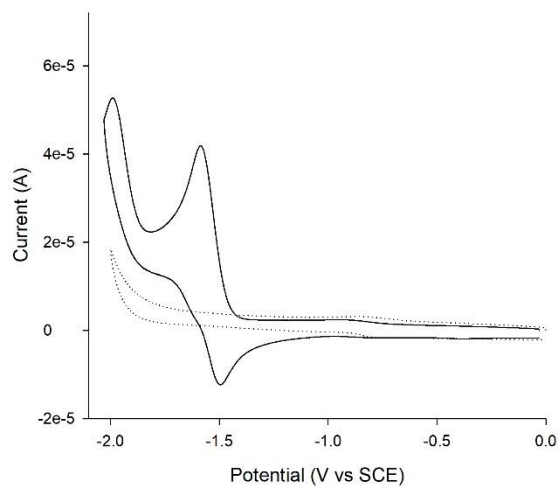

**3al**

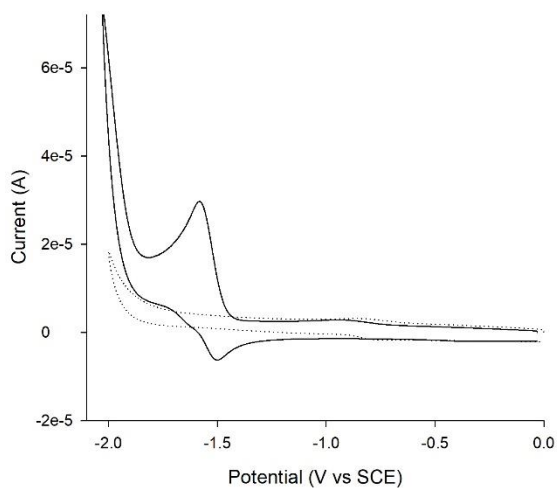

**3am**

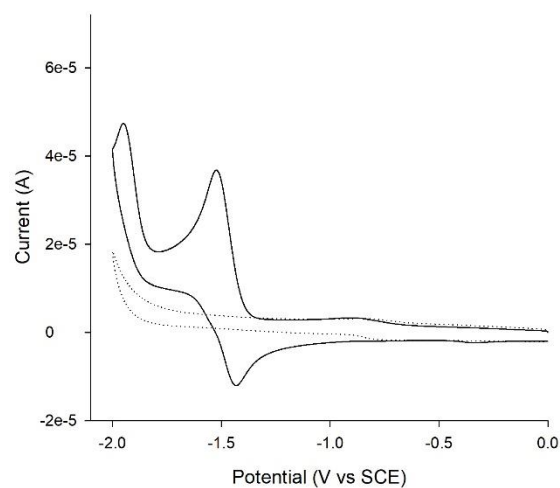

**3an**

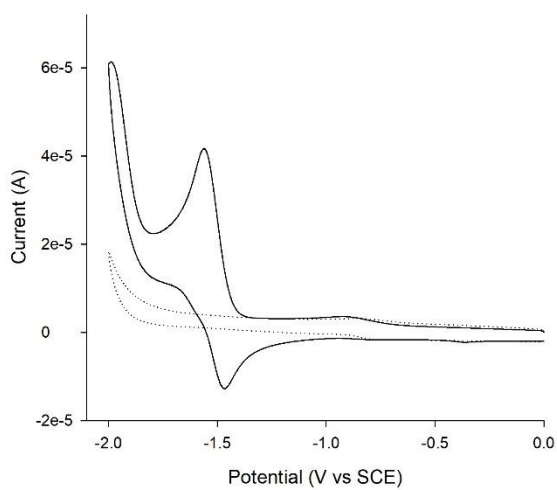

**3ao**

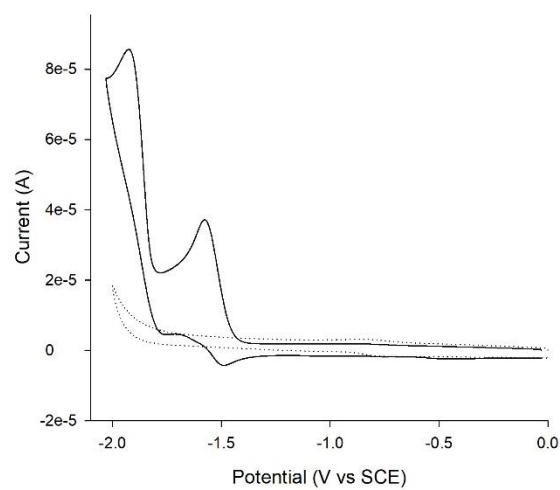

**3ap**

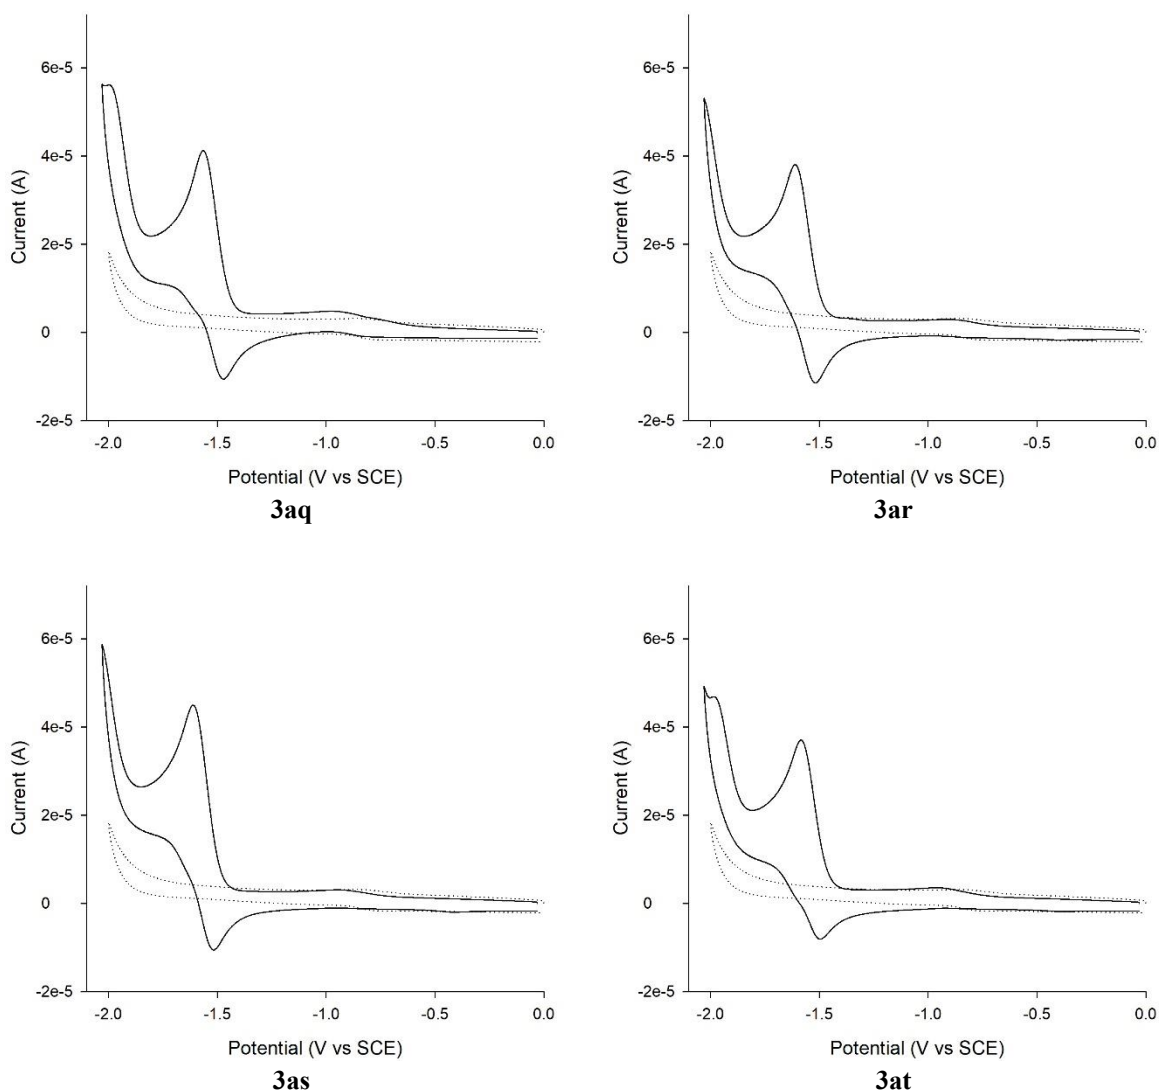

**Figure S5.** Cyclic voltammograms of synthesized molecules shown in Figure 1 & Scheme 2. (dotted line: blank)

### Steady-state UV-Vis absorption & photoluminescence spectroscopy

UV-Vis absorption spectra were collected on a Scinco S-3100 spectrophotometer with a Peltier temperature controller at 298 K. 50  $\mu\text{M}$   $\text{CH}_3\text{CN}$  solutions of the synthesized products were used for the measurements unless otherwise mentioned. Phosphorescence spectra were obtained using a PTI QuantaMaster steady-state spectrofluorometer at room temperature. The 50  $\mu\text{M}$  solutions were thoroughly deaerated by bubbling argon prior to performing the measurements. The excited state energy ( $E_{0.0}$ ) is the energy corresponding to the wavelength at which the absorption and emission spectra intersect.

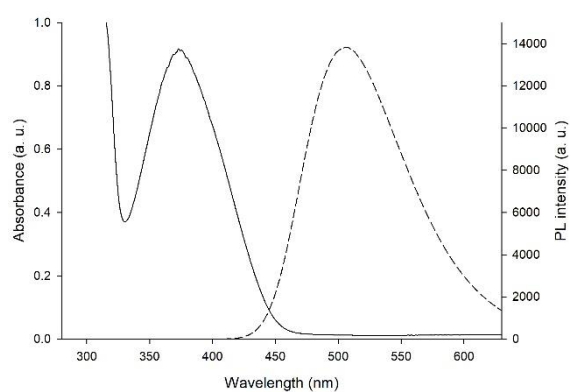

**3ba**

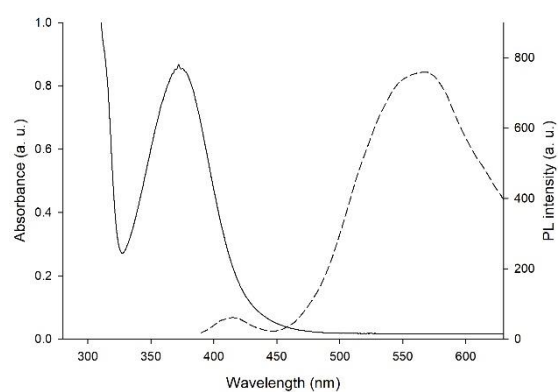

**3ca**

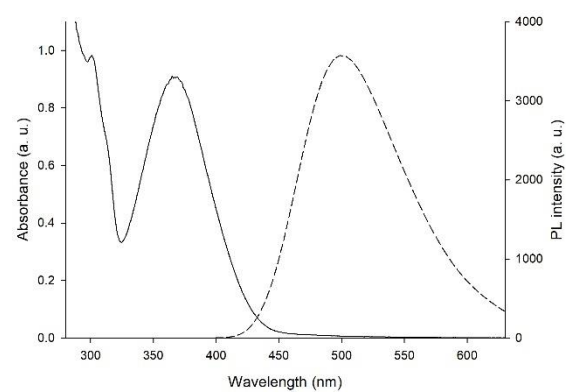

**3da**

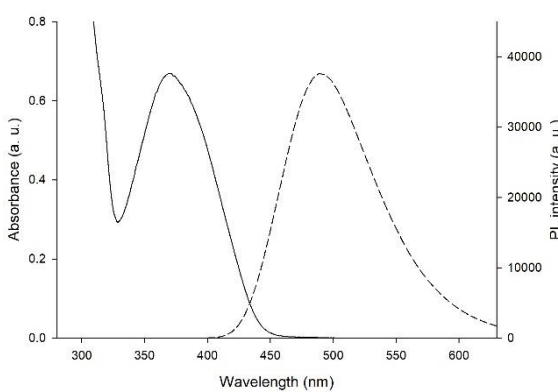

**3fa**

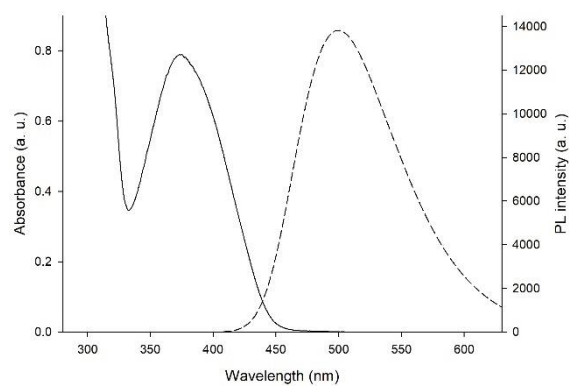

**3ga**

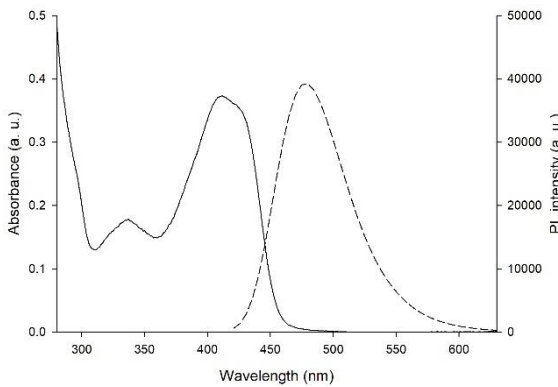

**3ha**

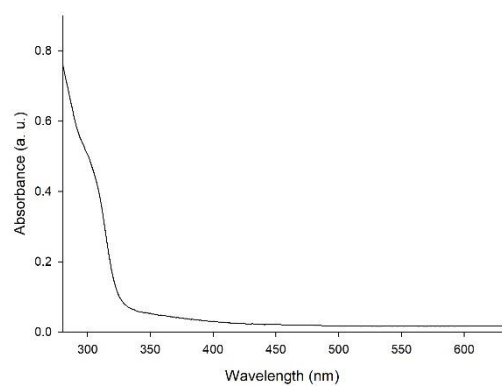

**3ia**

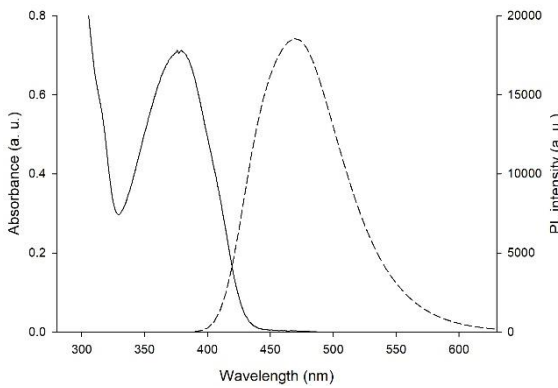

**3ja**



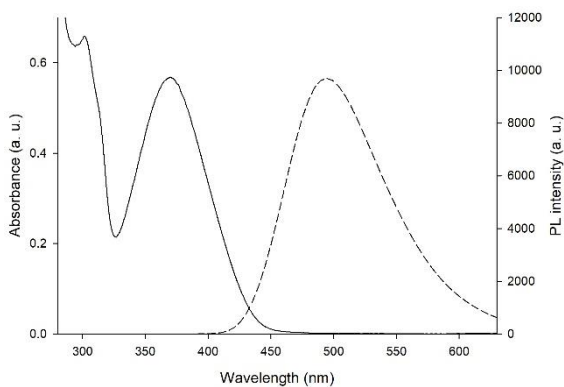

**3aj**

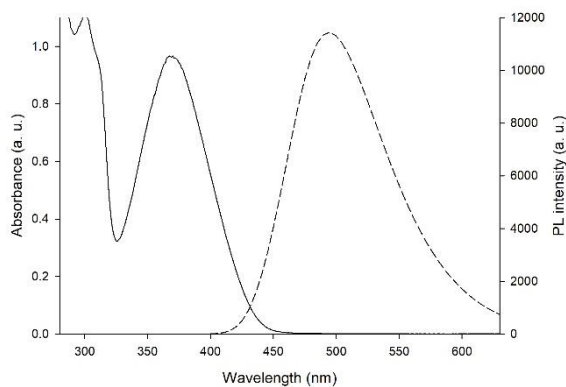

**3ak**

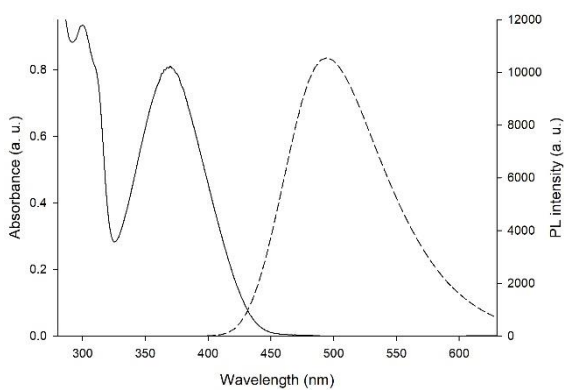

**3al**

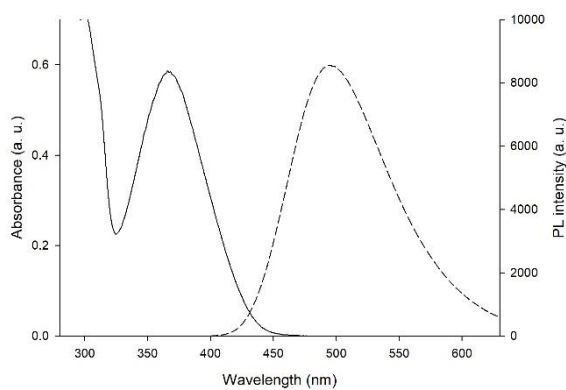

**3am**

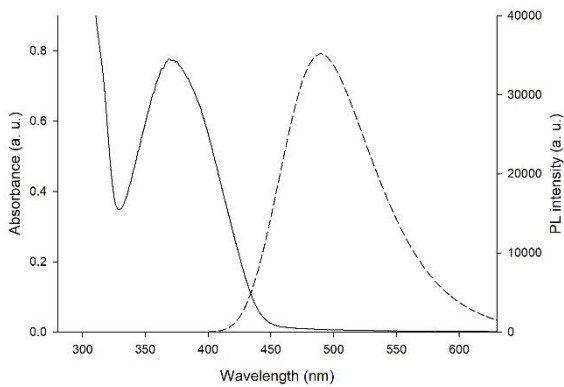

**3an**

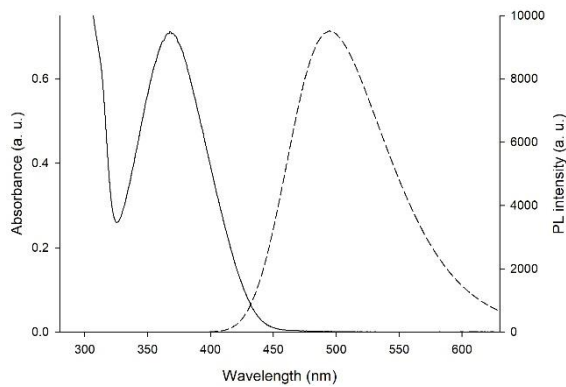

**3ao**

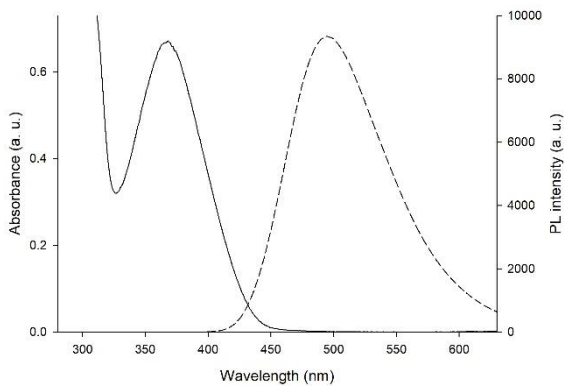

**3ap**

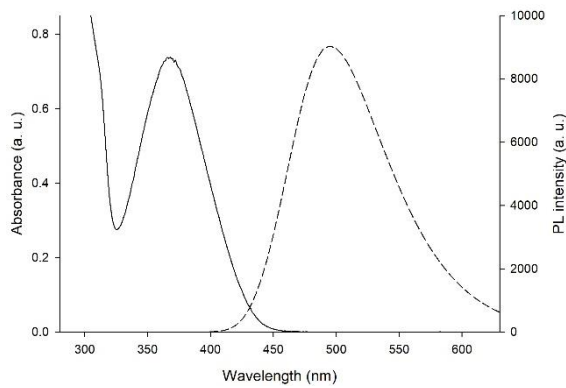

**3aq**

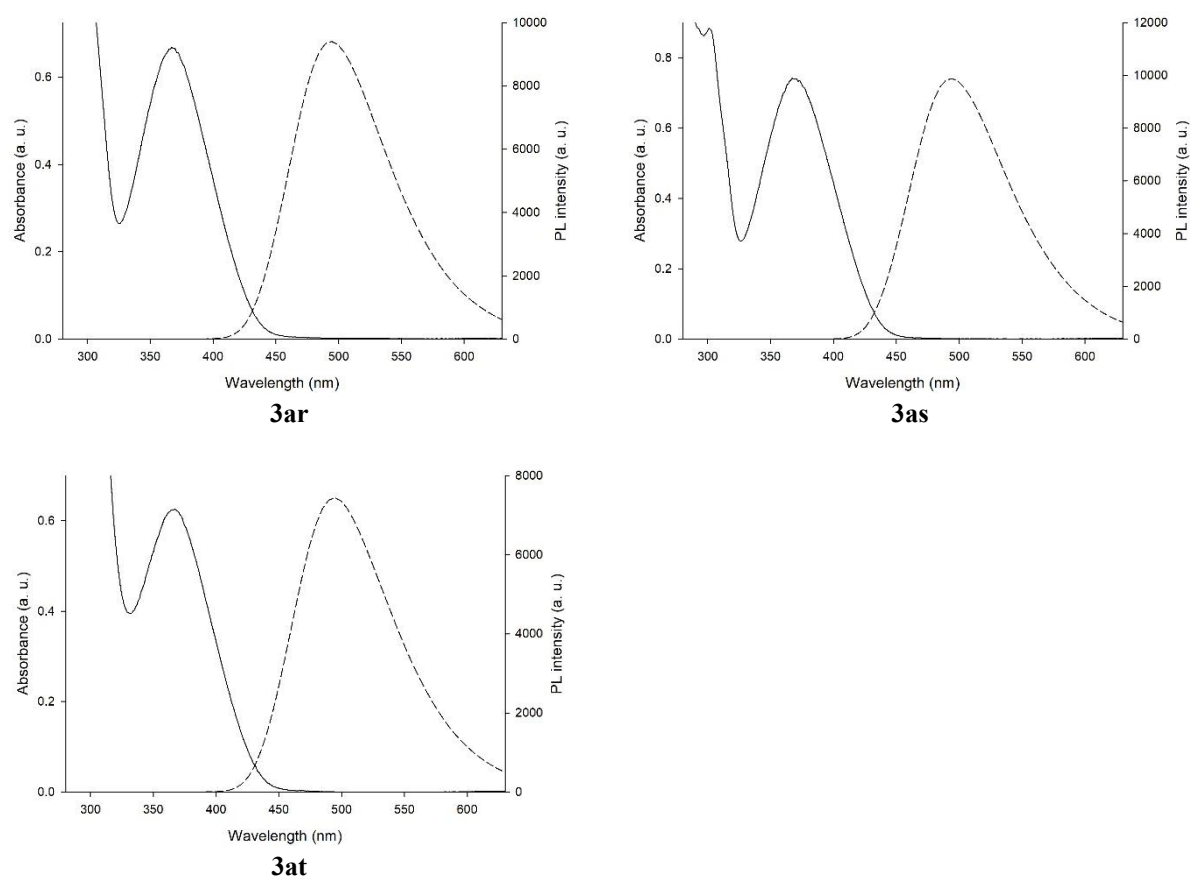

**Figure S6.** UV-Vis spectra and photoluminescence spectra of synthesized molecules shown in Figure 1 & Scheme 2.

### Calculation of the excited state energy ( $E_{0,0}$ ) and excited state reduction potential ( $E^*_{red}$ )

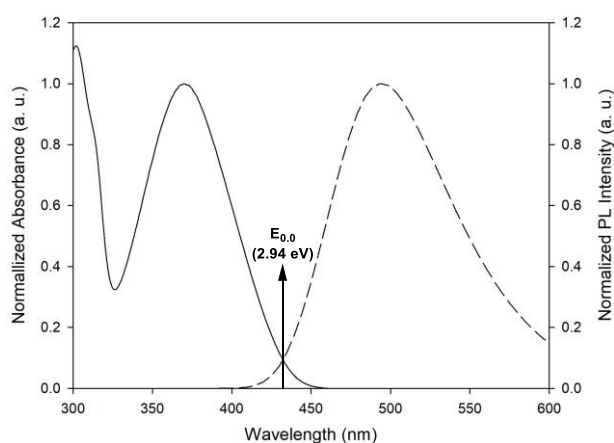

**Figure S7.** Steady state absorbance spectrum (solid line) and emission spectrum (dashed line) for **3aa**. Excitation energy  $E_{0,0}$  is determined to be 2.94 eV at the intersection of absorption and photoluminescence spectra normalized to 1.

The excited-state reduction potential is estimated according to the following relationship:

$$E^*_{\text{red}} = E_{\text{red}} + E_{0.0}$$

$E_{\text{red}}$  is the ground-state reduction potential and  $E_{0.0}$  is the excited state energy determined by Figure S7.<sup>S7</sup>

For example,

$$E^*_{\text{red}}(\mathbf{3aa}) = E_{\text{red}} (= -1.55) + E_{0.0} (= 2.94) = 1.39 \text{ V}$$

### Photoluminescence quantum yield ( $\Phi_{\text{PL}}$ ) measurement

The photoluminescence quantum yields (PLQYs,  $\Phi_{\text{PL}}$ ) were relatively determined according to following standard equation:

$$\Phi_{PL} = \Phi_{st} \cdot \frac{I}{I_{st}} \cdot \frac{A_{st}}{A} \cdot \frac{\eta^2}{\eta_{st}^2}$$

Where  $I$ ,  $A$ , and  $\eta$  are the integrated photoluminescence intensity, absorbance at the excitation wavelength and the refractive index of the solvent, respectively. All samples were prepared at 50  $\mu\text{M}$  concentration in degassed  $\text{CH}_3\text{CN}$ . Fluorescein (aqueous 0.1 N NaOH solution) was used as the external standard (= 0.79).<sup>S6</sup> The refractive index of the 0.1 N NaOH solution was assumed to be identical to the value for pure water.

## Summary of photo & electrochemical properties

| sample     | $E_{1/2}$ (V vs SCE) | $\lambda_{\text{max}}$ (nm) | $Em_{\text{max}}$ (nm) | $E_{0,0}$ (nm) |
|------------|----------------------|-----------------------------|------------------------|----------------|
| <b>3ba</b> | 1.56                 | 373                         | 508                    | 443            |
| <b>3ca</b> | 1.53                 | 372                         | 566                    | 455            |
| <b>3da</b> | 1.47                 | 365                         | 499                    | 434            |
| <b>3ea</b> | 1.46                 | 371                         | 489                    | 430            |
| <b>3fa</b> | 1.56                 | 372                         | 496                    | 433            |
| <b>3ga</b> | 1.41                 | 373                         | 497                    | 434            |
| <b>3ha</b> | 1.60                 | 411                         | 480                    | 446            |
| <b>3ja</b> | 1.42                 | 379                         | 469                    | 421            |

| sample     | $E_{1/2}$ (V vs SCE) | $\lambda_{\text{max}}$ (nm) | $Em_{\text{max}}$ (nm) | $E_{0,0}$ (nm) |
|------------|----------------------|-----------------------------|------------------------|----------------|
| <b>3ab</b> | 1.53                 | 370                         | 494                    | 431            |
| <b>3ac</b> | 1.54                 | 370                         | 494                    | 431            |
| <b>3ad</b> | 1.53                 | 370                         | 494                    | 431            |
| <b>3ae</b> | 1.56                 | 370                         | 494                    | 431            |
| <b>3af</b> | 1.53                 | 370                         | 494                    | 431            |
| <b>3ag</b> | 1.60                 | 373                         | 494                    | 433            |
| <b>3ah</b> | 1.51                 | 368                         | 495                    | 432            |
| <b>3ai</b> | 1.53                 | 370                         | 494                    | 431            |
| <b>3aj</b> | 1.52                 | 370                         | 494                    | 431            |
| <b>3ak</b> | 1.52                 | 370                         | 494                    | 431            |
| <b>3al</b> | 1.52                 | 370                         | 494                    | 431            |
| <b>3am</b> | 1.52                 | 366                         | 495                    | 434            |
| <b>3an</b> | 1.48                 | 369                         | 490                    | 429            |
| <b>3ao</b> | 1.51                 | 368                         | 495                    | 432            |
| <b>3ap</b> | 1.51                 | 368                         | 495                    | 432            |
| <b>3aq</b> | 1.49                 | 364                         | 495                    | 428            |
| <b>3ar</b> | 1.54                 | 367                         | 494                    | 431            |
| <b>3as</b> | 1.54                 | 367                         | 494                    | 431            |
| <b>3at</b> | 1.52                 | 368                         | 494                    | 431            |

## Photophysical and electrochemical properties of **5**

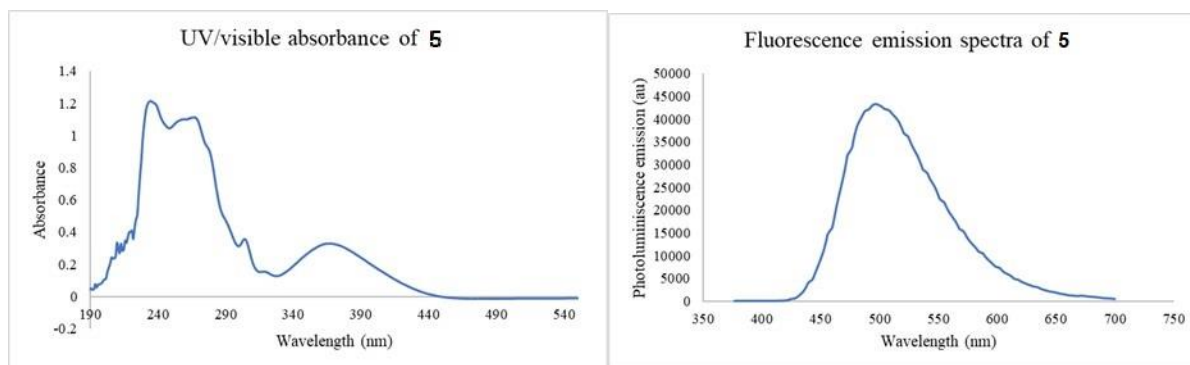

**Figure S8.** UV-vis absorption (left), and photoluminescence (right) spectra for 50  $\mu\text{M}$  of the compound **5** in MeCN.



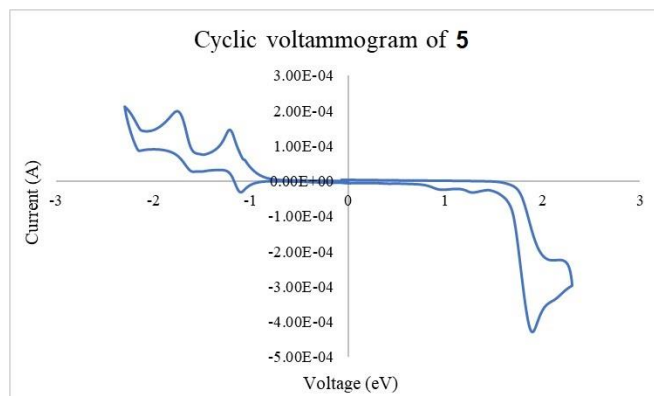

**Figure S9.** CV Diagram of **5** (10 mM) in MeCN/DCM (10:1), Ag/AgCl as a Reference Electrode, Bu<sub>4</sub>NPF<sub>6</sub> as an electrolyte.

### Determination of quantum yield with **3aa** and **3ja** for singlet oxygen generation

Air-equilibrated DMSO solutions containing substrate (10 μM), 1,3-diphenylisobenzofuran (DPBF), were photoexcited using a hand-held blue light lamp (240 mW, 450 nm, LEDC2-Collimated LED lamp by Thorlabs). The absorbance of DPBF at 418 nm was recorded during the photoillumination.

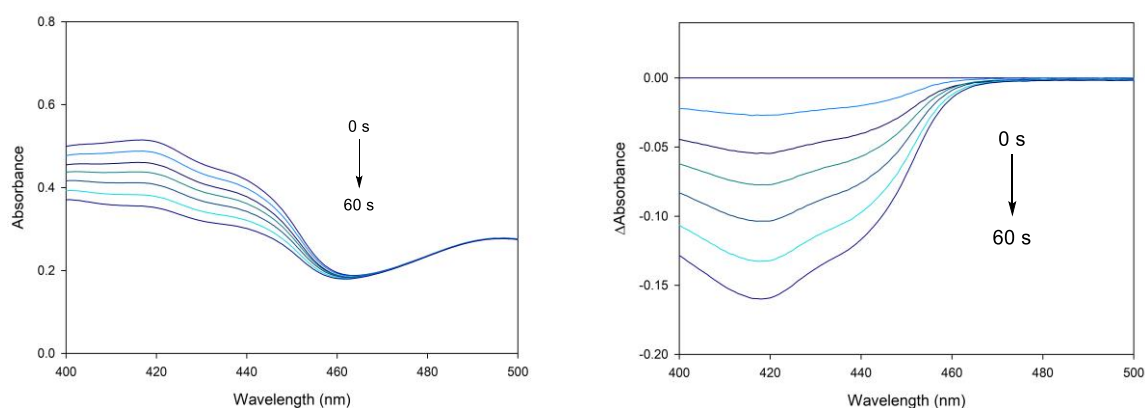

**Figure S10.** Changes in the UV–Vis absorption spectra of an O<sub>2</sub>-saturated DMSO containing 10 μM 1,3-diphenylisobenzofuran (DPBF) and 100 μM methylene blue upon photoexcitation at 450 nm.

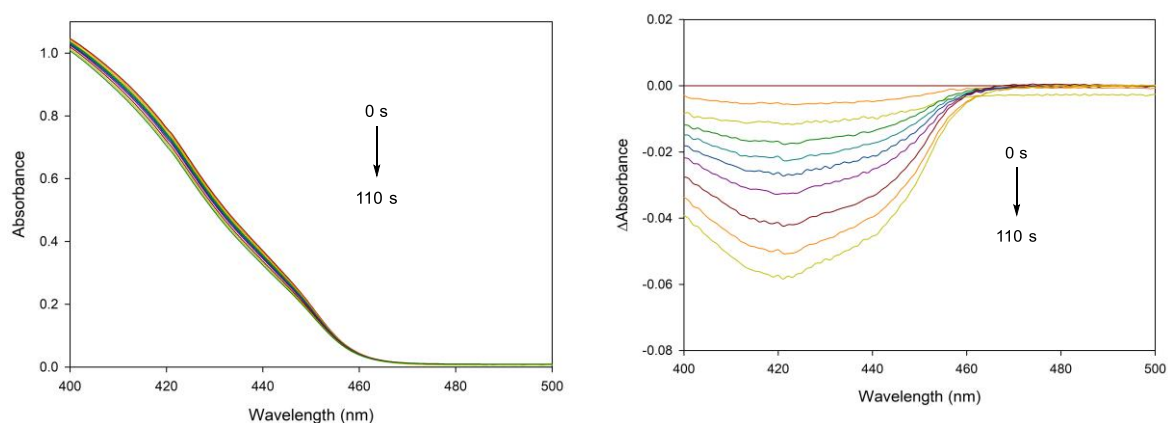

**Figure S11.** Changes in the UV–Vis absorption spectra of an O<sub>2</sub>-saturated DMSO containing 10 μM 1,3-diphenylisobenzofuran (DPBF) and 100 μM **3aa** upon photoexcitation at 450 nm.

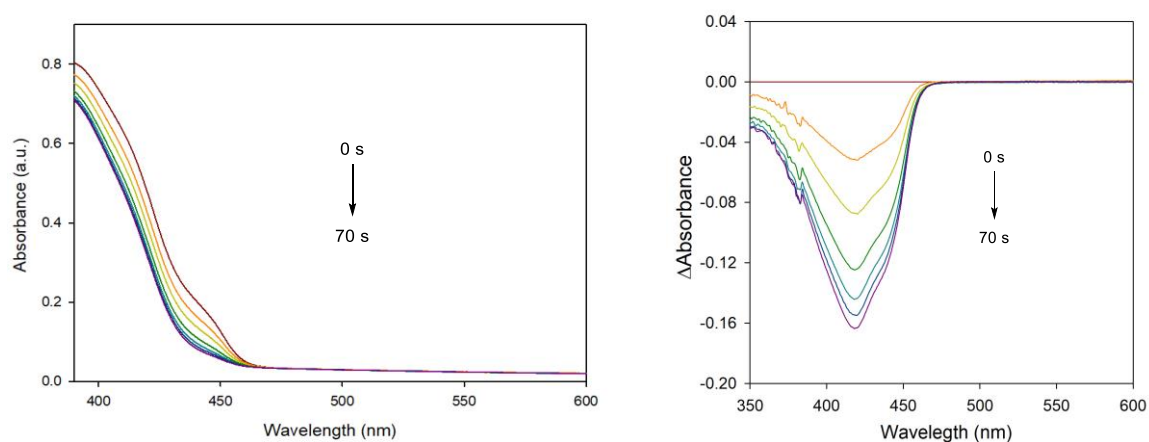

**Figure S12.** Changes in the UV–Vis absorption spectra of an O<sub>2</sub>-saturated DMSO containing 10 μM 1,3-diphenylisobenzofuran (DPBF) and 100 μM **3ja** upon photoexcitation at 450 nm.

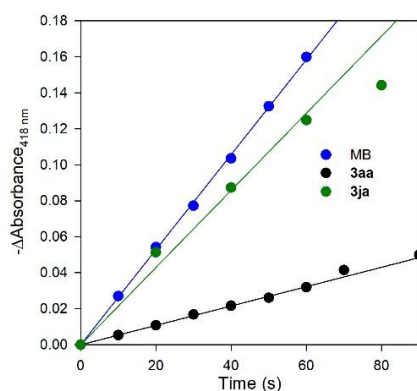

**Figure S13.** Changes at the 418 nm absorption bands ( $-\Delta\text{Absorbance}_{418\text{ nm}}$ ) of the MB/DPBF standard solution (blue), **3aa**/DPBF solution (black) and **3ja**/DPBF solution (green) as a function of photoirradiation time.

The  $\Phi_{\Delta}$  was calculated by the following relationship:

$$\Phi_{\Delta} = \Phi_{\Delta}(\text{MB}) \times (m/m(\text{MB})).$$

$\Phi_{\Delta}(\text{MB})$  is the reference methylene blue quantum yield (0.52),  $m$  is the slope of a linear fit to the data shown in Figure S13.

### Photoluminescence quenching experiment of **3aa**

Photoluminescence quenching experiments were performed in combination of **3aa** with DBU. Stern-Volmer analysis supports that the DBU quenched the excited state of **3aa**. A Stern-Volmer constants,  $K_{\text{SV}}(\text{DBU}) = 69.0 \text{ M}^{-1}$  were obtained.

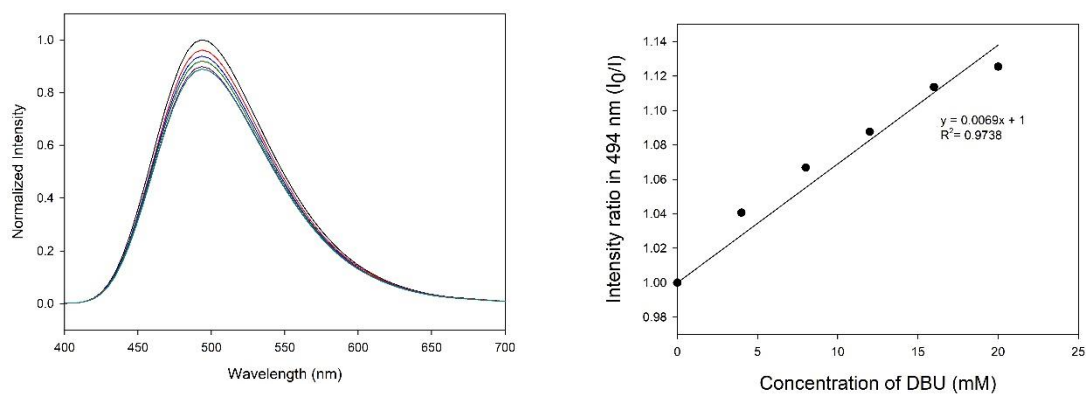

**Figure S14.** Photoluminescence spectra (excitation wavelength = 370 nm) of 100 μM **3aa** (Ar-saturated MeCN) obtained with increasing the concentration of DBU (0-20 mM). (left) Stern-Volmer plots for 100 μM **3aa** solution upon adding 0-20 mM DBU.

## Photographs of Preparation Process

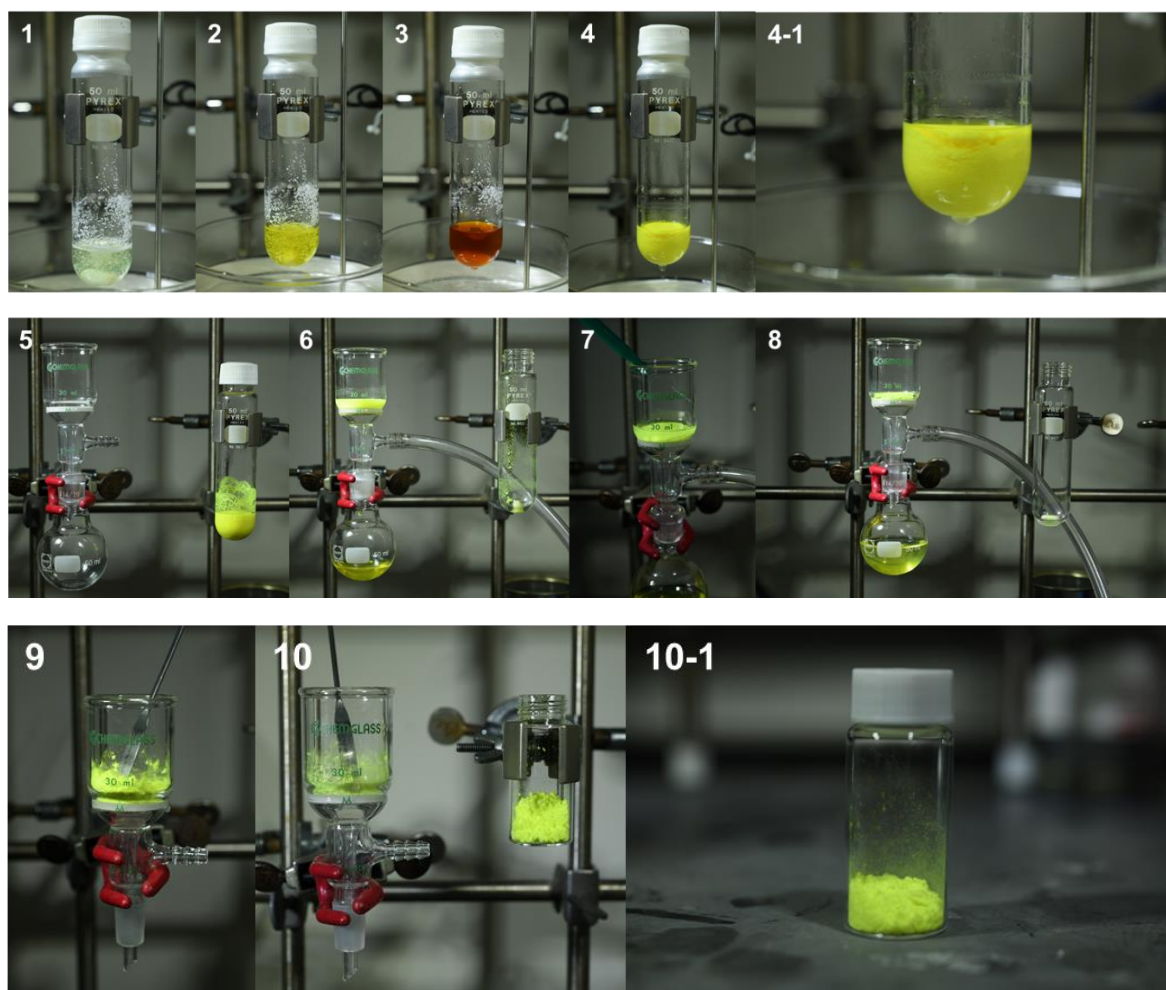

**Figure S15.** Photographs of preparation process of 3aa in 0.5 mmol scale. (1) Reaction mixture before heating; (2)  $t = 10$  min at 80 °C (3)  $t = 30$  min at 80 °C; (4)  $t = 14$  h. Reaction completed; (4-1) Close photographs of precipitated products; (5) Filtration set-up; (6) Filtering the reaction mixture; (7) Washing the crude precipitates with cold methanol for three times; (8) Drying filtered cakes; (9) Dried product; (10) Collected products; (10-1) Final products in glass vial.

## Structure Determination by NMR spectra

### 1D NOESY Spectrum of 3fa

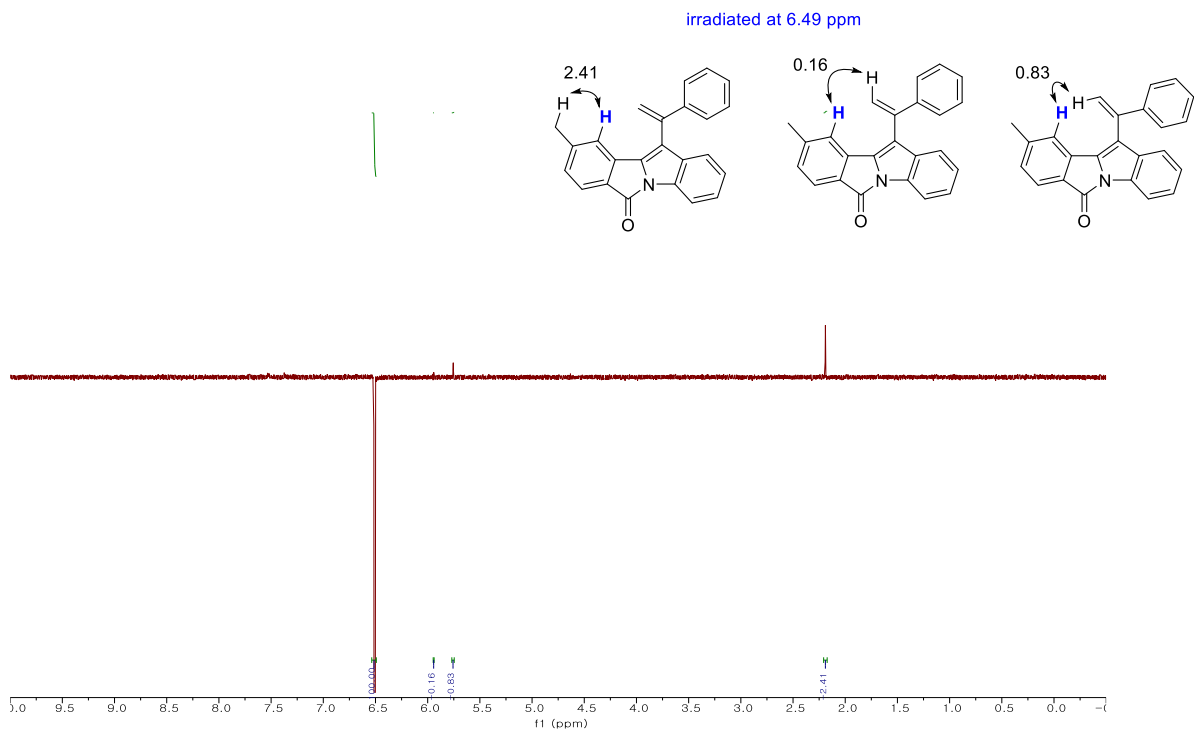

Figure S16. 1D NOESY spectrum of 3fa.

### <sup>1</sup>H-<sup>1</sup>H COSY Spectrum of 3fa

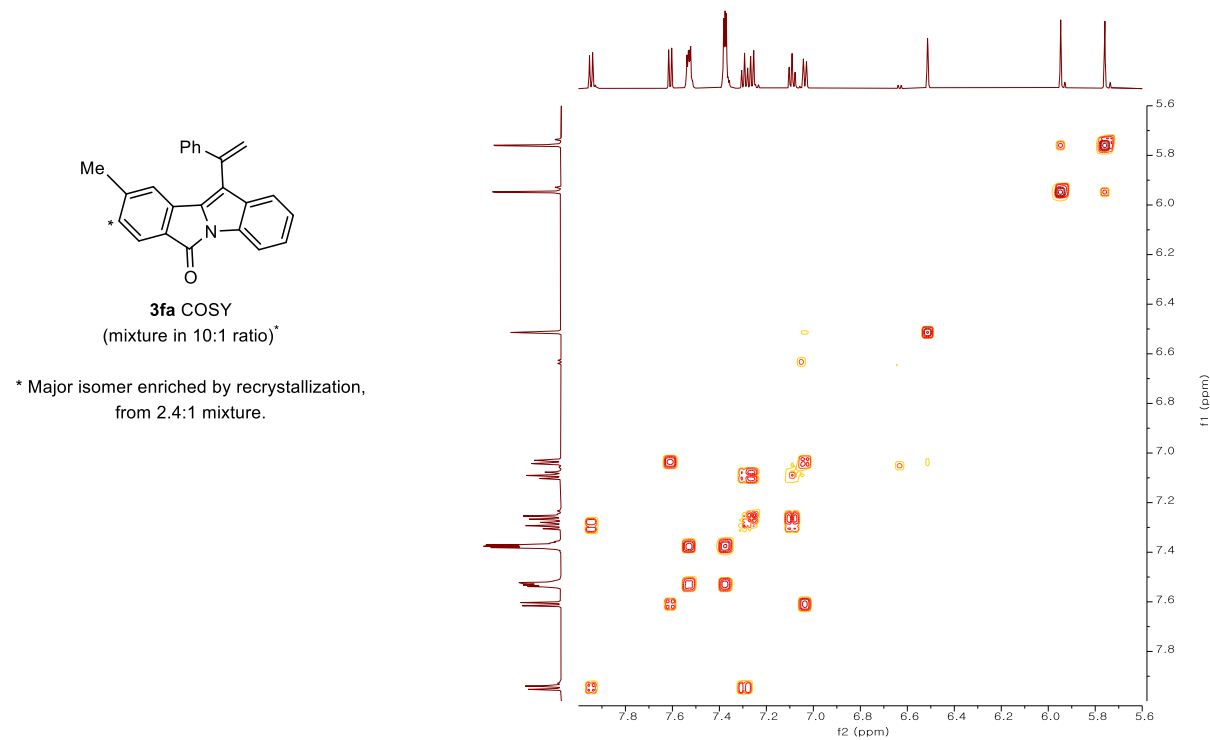

Figure S17. <sup>1</sup>H-<sup>1</sup>H COSY Spectrum of 3fa.

## 1D NOESY Spectrum of 3ga

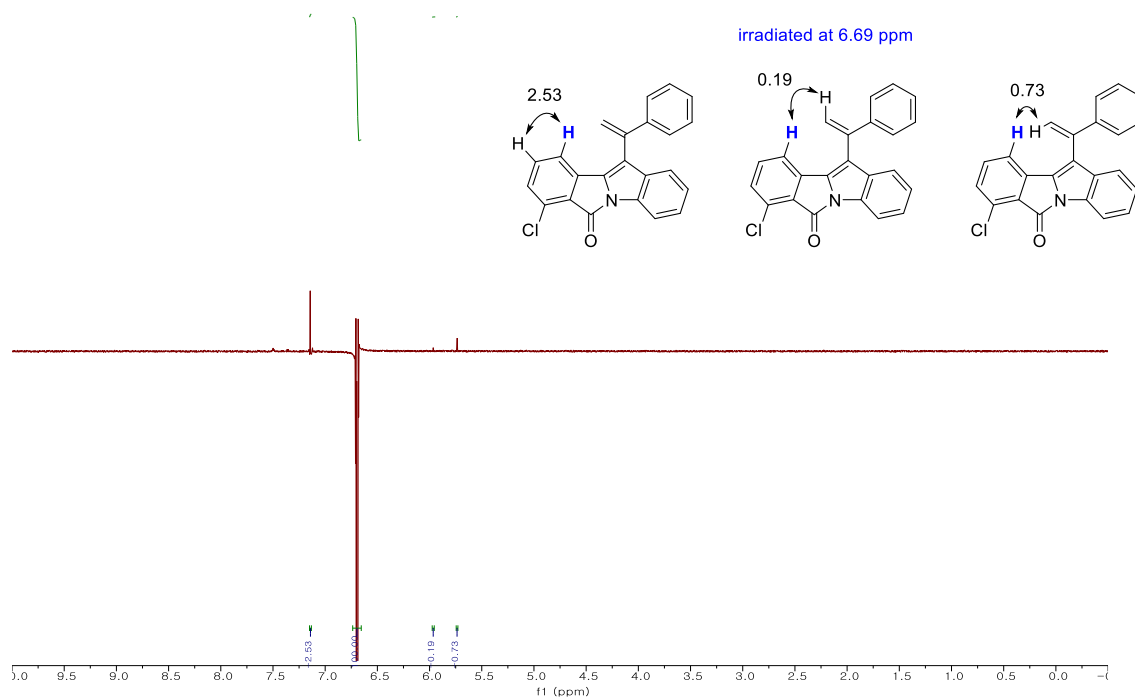

Figure S18. 1D NOESY spectrum of 3ga.

## <sup>1</sup>H-<sup>1</sup>H COSY Spectrum of 3ga

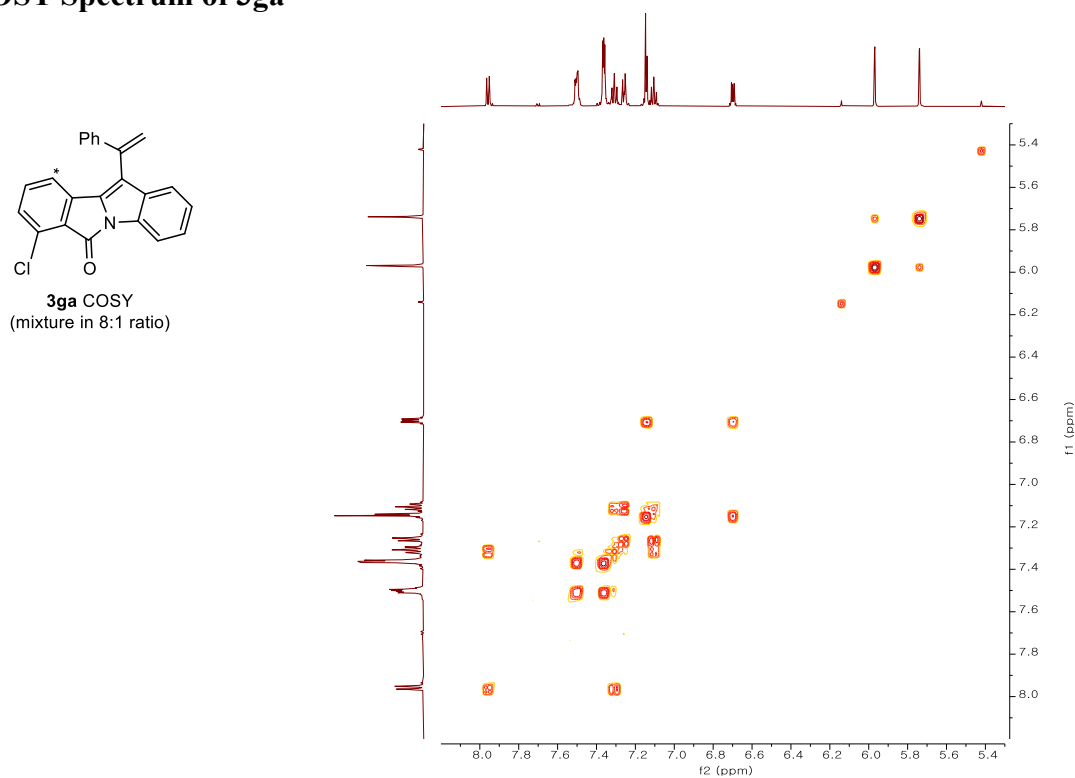

Figure S19. <sup>1</sup>H-<sup>1</sup>H COSY Spectrum of 3ga.

### $^1\text{H}$ - $^1\text{H}$ COSY Spectrum of 3ha

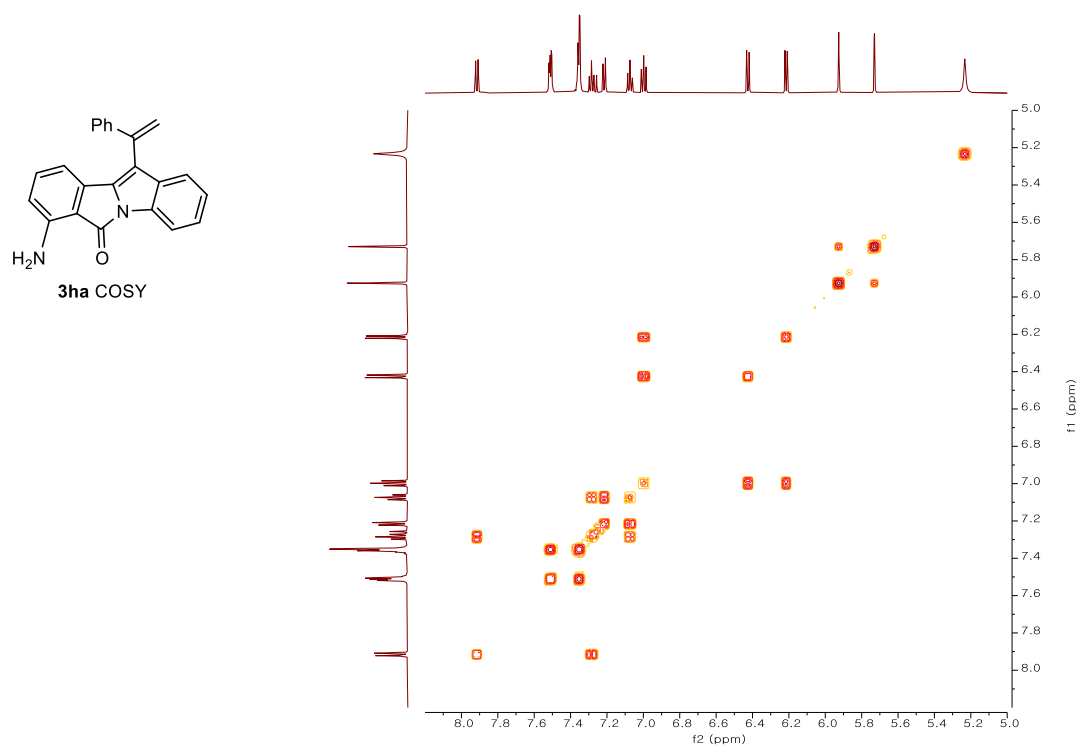

Figure S20.  $^1\text{H}$ - $^1\text{H}$  COSY Spectrum of 3ha.

### 1D NOESY Spectrum of 3na

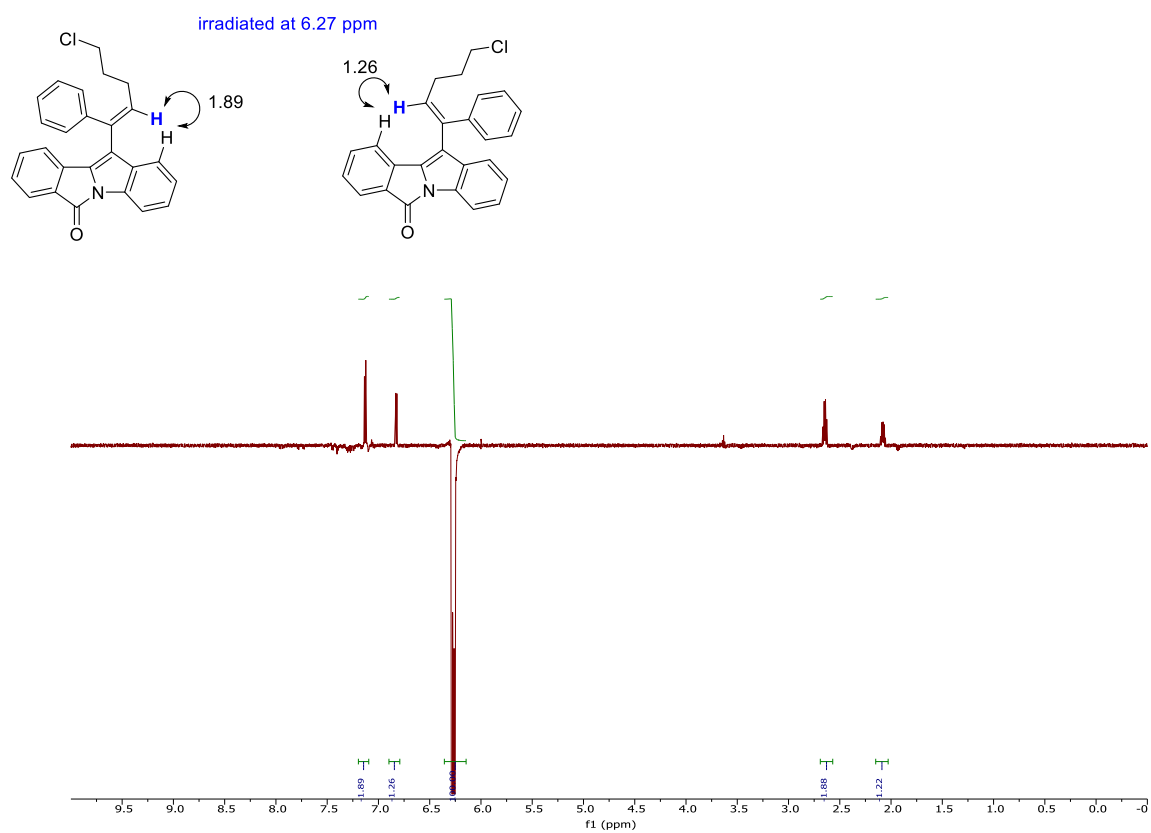

Figure S21. 1D NOESY spectrum of 3na.

## Synthesis of Substrates

### Scheme S2: General synthetic strategy for the preparation of phthalimide derivatives

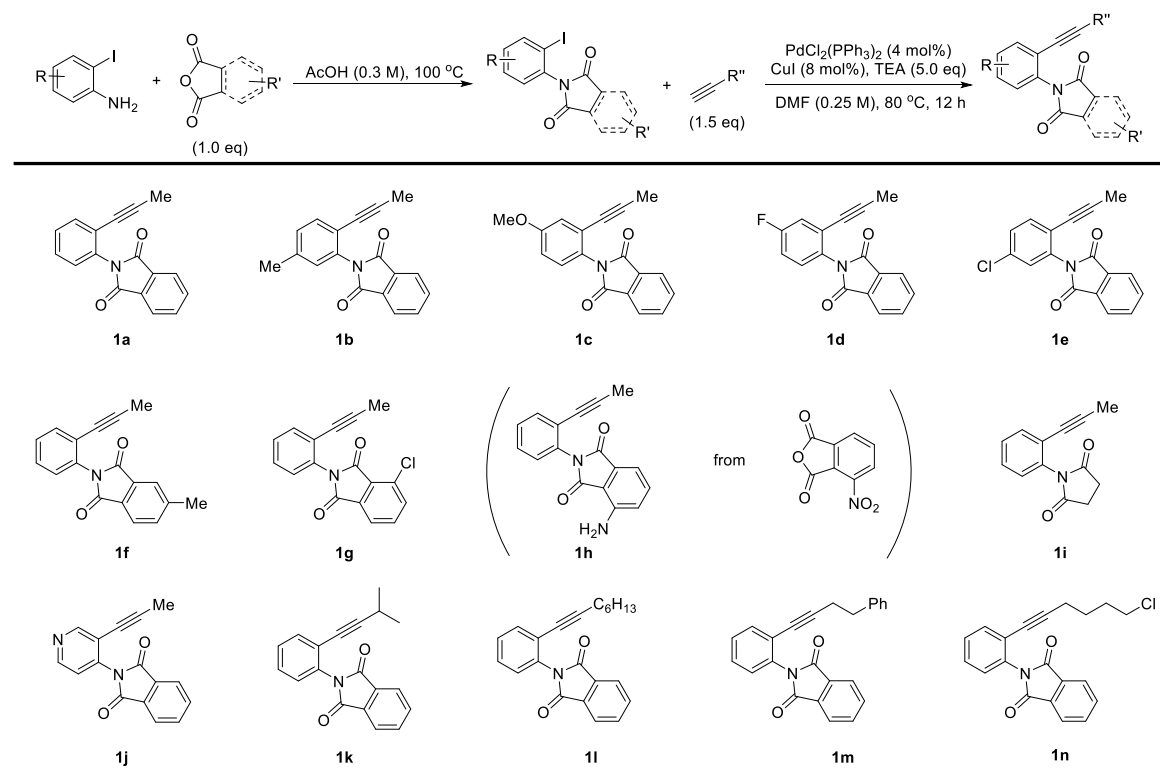

## Analytic Data for Substrates

2-(2-(prop-1-yn-1-yl)phenyl)isoindoline-1,3-dione, **1a**: colorless solid; melting point 134~136 °C; <sup>1</sup>H NMR (600 MHz, CDCl<sub>3</sub>) δ 7.96 (dd, *J* = 5.4, 3.1 Hz, 2H), 7.78 (dd, *J* = 5.4, 3.1 Hz, 2H), 7.56 (dd, *J* = 7.5, 1.8 Hz, 1H), 7.41 (td, *J* = 7.5, 1.6 Hz, 1H), 7.38 (td, *J* = 7.5, 1.6 Hz, 1H), 7.28 (dd, *J* = 7.7, 1.5 Hz, 1H), 1.83 (s, 3H); <sup>13</sup>C NMR (151 MHz, CDCl<sub>3</sub>) δ 167.13, 134.39, 133.36, 133.20, 132.19, 129.15, 129.06, 128.53, 124.08, 123.85, 91.55, 75.92, 4.50; IR (neat): ν<sub>max</sub> = 2988, 2901, 2338, 1720, 1382, 1079, 718 cm<sup>-1</sup>; HRMS *m/z* (EI) calc. for C<sub>17</sub>H<sub>11</sub>NO<sub>2</sub> [M<sup>+</sup>] 261.0790, found 261.0789; *R*<sub>f</sub> 0.31 (Hexane:EA, 4:1).

2-(5-methyl-2-(prop-1-yn-1-yl)phenyl)isoindoline-1,3-dione, **1b**: colorless solid; melting point 156~158 °C; <sup>1</sup>H NMR (600 MHz, CDCl<sub>3</sub>) δ 7.96 (dd, *J* = 5.4, 3.1 Hz, 2H), 7.78 (dd, *J* = 5.4, 3.1 Hz, 2H), 7.45 (d, *J* = 7.9 Hz, 1H), 7.20 (d, *J* = 7.9 Hz, 1H), 7.10 (s, 1H), 2.39 (s, 3H), 1.82 (s, 3H); <sup>13</sup>C NMR (151 MHz, CDCl<sub>3</sub>) δ 167.31, 139.00, 134.38, 133.19, 132.97, 132.27,



130.15, 129.65, 123.87, 121.07, 90.62, 75.88, 21.45, 4.53. **IR (neat)**:  $\nu_{\max}$  = 2987, 2323, 1721, 1372, 1082, 718  $\text{cm}^{-1}$ ; **HRMS**  $m/z$  (EI) calc. for  $\text{C}_{18}\text{H}_{13}\text{NO}_2$  [ $\text{M}^+$ ] 275.0946, found 275.0945;  $R_f$  0.31 (Hexane:EA, 4:1).

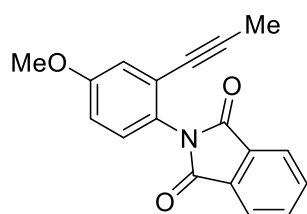

2-(4-methoxy-2-(prop-1-yn-1-yl)phenyl)isoindoline-1,3-dione, **1c**: colorless solid; melting point 144~146 °C;  **$^1\text{H}$  NMR (600 MHz,  $\text{CDCl}_3$ )**  $\delta$  7.95 (dd,  $J$  = 5.4, 3.1 Hz, 2H), 7.78 (dd,  $J$  = 5.4, 3.1 Hz, 2H), 7.18 (d,  $J$  = 8.7 Hz, 1H), 7.07 (d,  $J$  = 2.8 Hz, 1H), 6.94 (dd,  $J$  = 8.7, 2.8 Hz, 1H), 3.82 (s, 3H), 1.83 (s, 3H);  **$^{13}\text{C}$  NMR (151 MHz,  $\text{CDCl}_3$ )**  $\delta$  167.55, 159.90, 134.35, 132.27, 130.07, 126.05, 125.08, 123.85, 117.82, 115.03, 91.33, 75.91, 55.76, 4.54. **IR (neat)**:  $\nu_{\max}$  = 2972, 2358, 1723, 1504, 1385, 1082, 720  $\text{cm}^{-1}$ ; **HRMS**  $m/z$  (EI) calc. for  $\text{C}_{18}\text{H}_{13}\text{NO}_3$  [ $\text{M}^+$ ] 291.0895, found 291.0898;  $R_f$  0.24 (Hexane:EA, 4:1).

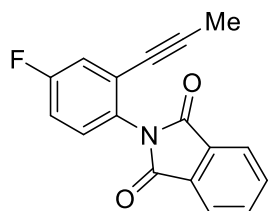

2-(4-fluoro-2-(prop-1-yn-1-yl)phenyl)isoindoline-1,3-dione, **1d**: colorless solid; melting point 162~164 °C;  **$^1\text{H}$  NMR (600 MHz,  $\text{CDCl}_3$ )**  $\delta$  7.95 (dd,  $J$  = 5.4, 3.1 Hz, 2H), 7.79 (dd,  $J$  = 5.4, 3.1 Hz, 2H), 7.24 (t,  $J$  = 9.1 Hz, 1H), 7.24 (d,  $J$  = 8.2 Hz, 1H), 7.10 (td,  $J$  = 8.2, 2.9 Hz, 1H), 1.83 (s, 3H);  **$^{13}\text{C}$  NMR (151 MHz,  $\text{CDCl}_3$ )**  $\delta$  167.10, 162.45 (d,  $J$  = 249.2 Hz), 134.51, 132.11, 130.79 (d,  $J$  = 9.6 Hz), 129.45, 126.07 (d,  $J$  = 10.6 Hz), 123.94, 119.92 (d,  $J$  = 24.2 Hz), 115.94 (d,  $J$  = 23.0 Hz) 92.90, 75.11, 4.50;  **$^{19}\text{F}$  NMR (564 MHz,  $\text{CDCl}_3$ )**  $\delta$  -112.14; **IR (neat)**:  $\nu_{\max}$  = 2987, 2322, 1728, 1499, 1385, 1172, 718  $\text{cm}^{-1}$ ; **HRMS**  $m/z$  (EI) calc. for  $\text{C}_{17}\text{H}_{10}\text{FNO}_2$  [ $\text{M}^+$ ] 279.0696, found 279.0694;  $R_f$  0.33 (Hexane:EA, 4:1).

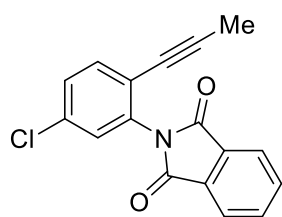

2-(5-chloro-2-(prop-1-yn-1-yl)phenyl)isoindoline-1,3-dione, **1e**: yellow solid; melting point 168~170 °C;  **$^1\text{H}$  NMR (600 MHz,  $\text{CDCl}_3$ )**  $\delta$  7.97 (dd,  $J$  = 5.4, 3.1 Hz, 2H), 7.80 (dd,  $J$  = 5.4, 3.1 Hz, 2H), 7.48 (d,  $J$  = 8.4 Hz, 1H), 7.37 (dd,  $J$  = 8.4, 2.1 Hz, 1H), 7.30 (d,  $J$  = 2.1 Hz, 1H), 1.83 (s, 3H);  **$^{13}\text{C}$  NMR (151 MHz,  $\text{CDCl}_3$ )**  $\delta$  166.75, 134.62, 134.38, 134.05, 133.91, 132.08, 129.54, 129.46, 124.06, 122.78, 92.73, 75.16, 4.59; **IR (neat)**:  $\nu_{\max}$  = 2988, 2355, 1723, 1489, 1369, 1077, 718  $\text{cm}^{-1}$ ; **HRMS**  $m/z$  (EI) calc. for  $\text{C}_{17}\text{H}_{10}\text{ClNO}_2$  [ $\text{M}^+$ ] 295.0400, found 295.0398;  $R_f$  0.31 (Hexane:EA, 4:1).

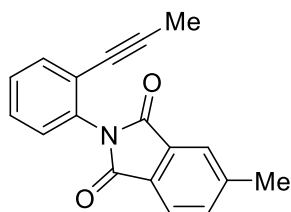

5-methyl-2-(2-(prop-1-yn-1-yl)phenyl)isoindoline-1,3-dione, **1f**: colorless solid; melting point 148~150 °C;  $^1\text{H NMR}$  (600 MHz,  $\text{CDCl}_3$ )  $\delta$  7.84 (d,  $J = 7.6$  Hz, 1H), 7.76 (s, 1H), 7.57 (d,  $J = 7.6$  Hz, 1H), 7.55 (dd,  $J = 7.6, 1.4$  Hz, 1H), 7.40 (ddd,  $J = 7.6, 7.6, 1.9$  Hz, 1H), 7.37 (ddd,  $J = 7.6, 7.6, 1.9$  Hz, 1H), 7.27 (dd,  $J = 7.6, 1.4$  Hz, 1H), 2.54 (s, 3H), 1.84 (s, 3H);  $^{13}\text{C NMR}$  (151 MHz,  $\text{CDCl}_3$ )  $\delta$  167.36, 167.26, 145.72, 134.98, 133.50, 133.22, 132.62, 129.65, 129.11, 129.10, 128.53, 124.39, 124.13, 123.81, 91.47, 75.98, 22.21, 4.55; **IR** (neat):  $\nu_{\text{max}} = 2917, 2355, 1718, 1493, 1374, 1104, 740$   $\text{cm}^{-1}$ ; **HRMS**  $m/z$  (EI) calc. for  $\text{C}_{18}\text{H}_{13}\text{NO}_2$  [ $\text{M}^+$ ] 275.0946, found 275.0948  $R_f$  0.36 (Hexane:EA, 4:1).

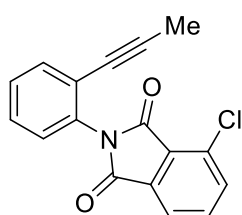

4-chloro-2-(2-(prop-1-yn-1-yl)phenyl)isoindoline-1,3-dione, **1g**: yellow solid; melting point 190~192 °C;  $^1\text{H NMR}$  (600 MHz,  $\text{CDCl}_3$ )  $\delta$  7.88 (dd,  $J = 5.2, 3.0$  Hz, 1H), 7.73-7.68 (m, 2H), 7.56 (dd,  $J = 6.6, 2.4$  Hz, 1H), 7.45-7.37 (m, 2H), 7.27 (dd,  $J = 7.3, 1.8$  Hz, 1H), 1.86 (s, 3H);  $^{13}\text{C NMR}$  (151 MHz,  $\text{CDCl}_3$ )  $\delta$  165.62, 164.68, 136.18, 135.34, 134.26, 133.28, 132.96, 131.95, 129.34, 129.01, 128.57, 127.90, 124.06, 122.39, 91.79, 75.89, 4.60; **IR** (neat):  $\nu_{\text{max}} = 2917, 2241, 1719, 1374, 1114, 900, 737$   $\text{cm}^{-1}$ ; **HRMS**  $m/z$  (EI) calc. for  $\text{C}_{17}\text{H}_{10}\text{ClNO}_2$  [ $\text{M}^+$ ] 295.0400, found 295.0401;  $R_f$  0.32 (Hexane:EA, 4:1).

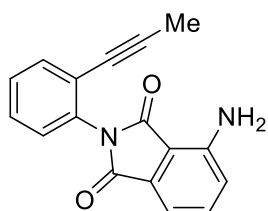

4-amino-2-(2-(prop-1-yn-1-yl)phenyl)isoindoline-1,3-dione, **1h**: yellow solid; melting point 210~212 °C;  $^1\text{H NMR}$  (600 MHz,  $\text{CDCl}_3$ )  $\delta$  7.55 (dd,  $J = 7.5, 1.8$  Hz, 1H), 7.46 (dd,  $J = 8.2, 7.2$  Hz, 1H), 7.40 (ddd,  $J = 7.6, 7.6, 1.8$  Hz, 1H), 7.37 (ddd,  $J = 7.6, 7.6, 1.8$  Hz, 1H), 7.27 (dd,  $J = 7.6, 1.4$  Hz, 1H), 7.24 (d,  $J = 7.2$  Hz, 1H), 6.89 (d,  $J = 8.2$  Hz, 1H), 5.33 (s, 2H), 1.88 (s, 3H);  $^{13}\text{C NMR}$  (151 MHz,  $\text{CDCl}_3$ )  $\delta$  169.13, 167.43, 145.91, 135.55, 133.50, 133.24, 132.90, 129.21, 129.01, 128.53, 124.21, 121.36, 113.21, 111.46, 91.48, 76.09, 4.65. **IR** (neat):  $\nu_{\text{max}} = 3369, 2987, 2355, 1700, 1493, 1371, 738$   $\text{cm}^{-1}$ ; **HRMS**  $m/z$  (EI) calc. for  $\text{C}_{17}\text{H}_{12}\text{N}_2\text{O}_2$  [ $\text{M}^+$ ] 276.0899, found 276.0896;  $R_f$  0.54 (Hexane:EA, 1:1).

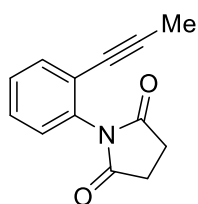

1-(2-(prop-1-yn-1-yl)phenyl)pyrrolidine-2,5-dione, **1i**: brown solid; melting point 154~156 °C;  $^1\text{H NMR}$  (600 MHz,  $\text{CDCl}_3$ )  $\delta$  7.53 (dd,  $J = 7.4, 2.0$  Hz, 1H), 7.39-7.34 (m, 2H), 7.15 (dd,  $J = 7.0, 2.0$  Hz, 1H), 2.88 (s, 4H), 1.99 (s, 3H);  $^{13}\text{C NMR}$  (151 MHz,  $\text{CDCl}_3$ )  $\delta$  175.93, 133.67, 133.28, 129.31, 128.66, 128.26, 123.25, 91.29, 75.61, 28.85, 4.59; **IR** (neat):  $\nu_{\text{max}} = 2987, 2355, 1712, 1385, 1183, 764$   $\text{cm}^{-1}$ ;  $R_f$  0.48 (Hexane:EA, 2:1).

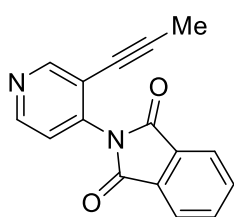

2-(3-(prop-1-yn-1-yl)pyridin-4-yl)isoindoline-1,3-dione, **1j**: colorless solid; melting point 142~144 °C; <sup>1</sup>H NMR (600 MHz, CDCl<sub>3</sub>) δ 8.79 (s, 1H), 8.61 (d, *J* = 5.2 Hz, 1H), 7.97 (dd, *J* = 5.4, 3.0 Hz, 2H), 7.81 (dd, *J* = 5.4, 3.0 Hz, 2H), 7.24 (d, *J* = 5.2 Hz, 1H), 1.92 (s, 3H); <sup>13</sup>C NMR (151 MHz, CDCl<sub>3</sub>) δ 165.88, 154.51, 149.01, 140.56, 134.81, 131.98, 124.24, 122.93, 120.41, 95.31, 73.45, 4.76; **IR** (neat):  $\nu_{\max}$  = 2987, 2245, 1723, 1372, 1082, 717 cm<sup>-1</sup>; **HRMS** *m/z* (EI) calc. for C<sub>16</sub>H<sub>10</sub>N<sub>2</sub>O<sub>2</sub> [M<sup>+</sup>] 262.0742, found 262.0739; **R<sub>f</sub>** 0.40 (Hexane:EA, 1:1).

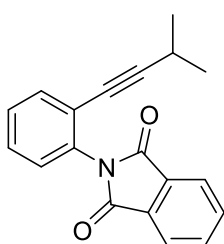

2-(2-(3-methylbut-1-yn-1-yl)phenyl)isoindoline-1,3-dione, **1k**: colorless solid; melting point 142~144 °C; <sup>1</sup>H NMR (600 MHz, CDCl<sub>3</sub>) δ 7.96 (dd, *J* = 5.4, 3.1 Hz, 2H), 7.78 (dd, *J* = 5.4, 3.1 Hz, 2H), 7.54 (dd, *J* = 7.5, 1.7 Hz, 1H), 7.41 (td, *J* = 7.5, 1.5 Hz, 1H), 7.38 (td, *J* = 7.6, 1.7 Hz, 1H), 7.31 (dd, *J* = 7.6, 1.5 Hz, 1H), 2.53 (hept, *J* = 6.8 Hz, 1H), 0.92 (d, *J* = 6.8 Hz, 6H); <sup>13</sup>C NMR (151 MHz, CDCl<sub>3</sub>) δ 167.15, 134.39, 133.76, 132.68, 132.30, 129.20, 129.13, 128.51, 124.03, 123.75, 101.57, 76.04, 22.66, 21.13; **IR** (neat):  $\nu_{\max}$  = 2971, 2355, 1724, 1379, 1104, 718 cm<sup>-1</sup>; **HRMS** *m/z* (EI) calc. for C<sub>19</sub>H<sub>15</sub>NO<sub>2</sub> [M<sup>+</sup>] 289.1103, found 289.1104; **R<sub>f</sub>** 0.41 (Hexane:EA, 4:1).

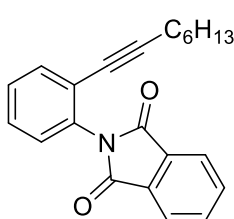

2-(2-(oct-1-yn-1-yl)phenyl)isoindoline-1,3-dione, **1l**: yellow solid; melting point 56~58 °C; <sup>1</sup>H NMR (600 MHz, CDCl<sub>3</sub>) δ 7.94 (dd, *J* = 5.4, 3.1 Hz, 2H), 7.77 (dd, *J* = 5.4, 3.1 Hz, 2H), 7.55 (dd, *J* = 7.1, 2.0 Hz, 1H), 7.43-7.35 (m, 2H), 7.29 (dd, *J* = 7.5, 1.6 Hz, 1H), 2.19 (t, *J* = 7.0 Hz, 2H), 1.23 (tt, *J* = 7.5, 7.3 Hz, 2H), 1.18-1.08 (m, 4H), 1.02 (qt, *J* = 7.3, 6.9 Hz, 2H), 0.80 (t, *J* = 7.3 Hz, 3H); <sup>13</sup>C NMR (151 MHz, CDCl<sub>3</sub>) δ 167.08, 134.33, 133.50, 132.92, 132.23, 129.16, 129.08, 128.45, 124.14, 123.76, 96.22, 76.79, 31.32, 28.47, 28.39, 22.47, 19.44, 14.15; **IR** (neat):  $\nu_{\max}$  = 2929, 2229, 1719, 1493, 1378, 888, 717 cm<sup>-1</sup>; **HRMS** *m/z* (EI) calc. for C<sub>22</sub>H<sub>21</sub>NO<sub>2</sub> [M<sup>+</sup>] 331.1572, found 331.1576; **R<sub>f</sub>** 0.45 (Hexane:EA, 4:1).

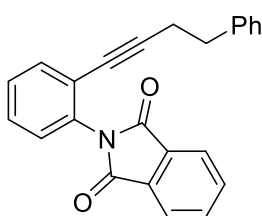

2-(2-(4-phenylbut-1-yn-1-yl)phenyl)isoindoline-1,3-dione, **1m**: colorless solid; melting point 142~144 °C; <sup>1</sup>H NMR (600 MHz, CDCl<sub>3</sub>) δ 7.96 (dd, *J* = 5.4, 3.1 Hz, 2H), 7.79 (dd, *J* = 5.4, 3.1 Hz, 2H), 7.56 (dd, *J* = 7.1, 2.0 Hz, 1H), 7.44 (td, *J* = 7.6, 1.6 Hz, 1H), 7.41 (td, *J* = 7.6, 1.6 Hz, 1H), 7.32 (d, *J* = 7.5 Hz, 1H), 7.20 (t, *J* = 7.3 Hz, 2H), 7.14 (t, *J* = 7.3 Hz, 1H), 7.05 (d, *J* = 7.3 Hz, 2H), 2.60 (t, *J* = 7.5 Hz, 2H), 2.51 (t, *J* = 7.5 Hz, 2H); <sup>13</sup>C NMR (151 MHz, CDCl<sub>3</sub>) δ 167.10, 140.40, 134.39, 133.50, 133.48, 133.11, 132.22, 129.18, 129.09, 128.67, 128.42, 128.28, 126.36, 123.84, 95.29, 77.48, 34.91, 21.61; **IR** (neat):  $\nu_{\max}$  = 2987, 2355, 1720, 1379, 1264, 733, 701 cm<sup>-1</sup>; **HRMS** *m/z* (EI) calc. for C<sub>24</sub>H<sub>17</sub>NO<sub>2</sub> [M<sup>+</sup>] 351.1259, found 351.1256; **R<sub>f</sub>** 0.35 (Hexane:EA, 4:1).

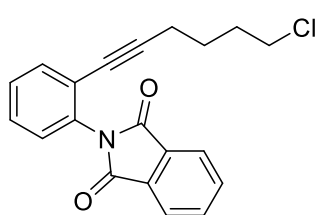

2-(2-(6-chlorohex-1-yn-1-yl)phenyl)isoindoline-1,3-dione, **1n**: yellow oil;  $^1\text{H NMR}$  (600 MHz,  $\text{CDCl}_3$ )  $\delta$  7.95 (dd,  $J = 5.4, 3.1$  Hz, 2H), 7.78 (dd,  $J = 5.4, 3.1$  Hz, 2H), 7.55 (dd,  $J = 7.5, 1.6$  Hz, 1H), 7.42 (td,  $J = 7.6, 1.9$  Hz, 1H), 7.39 (td,  $J = 7.6, 1.6$  Hz, 1H), 7.30 (dd,  $J = 7.6, 1.3$  Hz, 1H), 3.30 (t,  $J = 6.5$  Hz, 2H), 2.25 (t,  $J = 6.9$  Hz, 2H), 1.63 (tt,  $J = 8.0, 6.5$  Hz, 2H), 1.42 (tt,  $J = 8.0, 6.9$  Hz, 2H);  $^{13}\text{C NMR}$  (151 MHz,  $\text{CDCl}_3$ )  $\delta$  167.02, 134.47, 133.44, 133.00, 132.13, 129.19, 129.11, 128.68, 123.81, 123.79, 94.97, 77.42, 44.42, 31.26, 25.62, 18.70; **IR** (neat):  $\nu_{\text{max}} = 3674, 2957, 2355, 1720, 1378, 1081, 718$   $\text{cm}^{-1}$ ; **HRMS**  $m/z$  (EI) calc. for  $\text{C}_{20}\text{H}_{16}\text{ClNO}_2$  [ $\text{M}^+$ ] 337.0870, found 337.0869;  $R_f$  0.31 (Hexane:EA, 4:1).

### Synthesis of 11-Arylvinyl-6*H*-Isoindolo[2,1-*a*]indol-6-ones

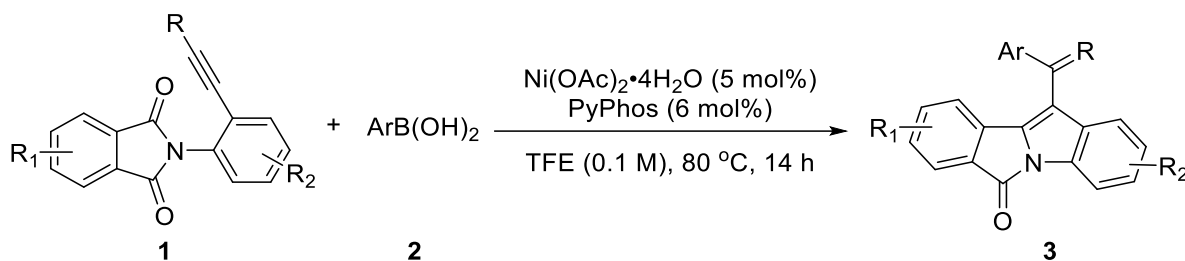

An oven-dried 25 mL reaction tube with rubber septum, equipped with a magnetic stirrer bar, was charged with **1** (0.5 mmol),  $\text{Ni}(\text{OAc})_2 \cdot 4\text{H}_2\text{O}$  (5 mol%), Pyphos (6 mol%), and **2** (0.75 mmol). The tube was purged with nitrogen gas before the addition of 2,2,2-trifluoroethanol (5 mL) and allowed to stir at 80 °C for 14 h. The reaction progress was monitored using thin layer chromatography or gas chromatography. After the completion, the reaction mixture was cooled to room temperature and filtered. The filter cake was washed with cold methanol with three times to give the corresponding 11-arylvinyl-6*H*-Isoindolo[2,1-*a*]indol-6-ones product **3**.

## Analytic Data for 11-Arylviny-6*H*-Isoindolo[2,1-*a*]indol-6-ones

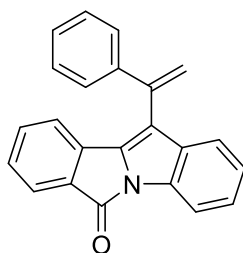

11-(1-phenylvinyl)-6*H*-isoinidolo[2,1-*a*]indol-6-one, **3aa**: yellow solid (146 mg, 91% yield); melting point 163~165 °C; <sup>1</sup>H NMR (600 MHz, CDCl<sub>3</sub>) δ 7.97 (d, *J* = 8.0 Hz, 1H), 7.75 (d, *J* = 6.4 Hz, 1H), 7.54 (dd, *J* = 6.4, 2.8 Hz, 2H), 7.41-7.34 (m, 3H), 7.31 (t, *J* = 7.6 Hz, 1H), 7.28-7.23 (m, 3H), 7.10 (t, *J* = 7.6 Hz, 1H), 6.82 (d, *J* = 6.8 Hz, 1H), 5.96 (d, *J* = 1.1 Hz, 1H), 5.76 (d, *J* = 1.1 Hz, 1H); <sup>13</sup>C NMR (151 MHz, CDCl<sub>3</sub>) δ 162.72, 140.59, 140.20, 135.85, 134.68, 134.52, 133.96, 133.77, 133.66, 128.92, 128.66, 128.61, 127.58, 126.80, 125.27, 124.02, 122.62, 122.15, 120.20, 117.83, 113.51; **IR** (neat):  $\nu_{\max}$  = 2927, 1719, 1443, 1361, 916, 744, 701 cm<sup>-1</sup>; **HRMS** *m/z* (EI) calc. for C<sub>23</sub>H<sub>15</sub>NO [M<sup>+</sup>] 321.1154, found 321.1155; **R<sub>f</sub>** 0.62 (Hexane:EA, 4:1).

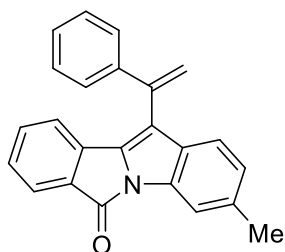

3-methyl-11-(1-phenylvinyl)-6*H*-isoinidolo[2,1-*a*]indol-6-one, **3ba**: yellow solid (149 mg, 89% yield); melting point 175~177 °C; <sup>1</sup>H NMR (600 MHz, CDCl<sub>3</sub>) δ 7.79 (s, 1H), 7.74 (dd, *J* = 6.5, 2.2 Hz, 1H), 7.52 (dd, *J* = 6.5, 3.0 Hz, 2H), 7.39-7.34 (m, 3H), 7.27-7.21 (m, 2H), 7.11 (d, *J* = 8.0 Hz, 1H), 6.92 (d, *J* = 8.7 Hz, 1H), 6.78 (dd, *J* = 6.2, 1.7 Hz, 1H), 5.93 (d, *J* = 1.1 Hz, 1H), 5.74 (d, *J* = 1.1 Hz, 1H), 2.45 (s, 3H); <sup>13</sup>C NMR (151 MHz, CDCl<sub>3</sub>) δ 162.81, 140.73, 140.28, 137.41, 135.28, 134.83, 134.14, 133.91, 133.59, 132.24, 128.91, 128.58, 128.42, 127.62, 125.34, 125.25, 122.45, 121.80, 120.39, 117.70, 113.94, 21.90; **IR** (neat):  $\nu_{\max}$  = 2970, 1739, 1437, 1366, 1229, 890, 528 cm<sup>-1</sup>; **HRMS** *m/z* (EI) calc. for C<sub>24</sub>H<sub>17</sub>NO [M<sup>+</sup>] 335.1310, found 335.1307; **R<sub>f</sub>** 0.63 (Hexane:EA, 4:1).

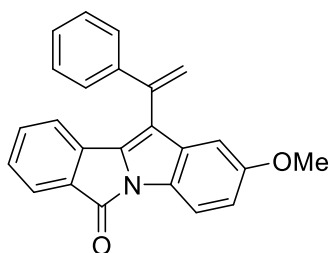

2-methoxy-11-(1-phenylvinyl)-6*H*-isoinidolo[2,1-*a*]indol-6-one, **3ca**: yellow solid (126 mg, 72% yield); melting point 189~191 °C; <sup>1</sup>H NMR (600 MHz, CDCl<sub>3</sub>) δ 7.83 (d, *J* = 8.7 Hz, 1H), 7.71 (dd, *J* = 5.5, 3.0 Hz, 1H), 7.53 (dd, *J* = 6.5, 3.0 Hz, 2H), 7.39-7.35 (m, 3H), 7.26-7.20 (m, 2H), 6.89 (dd, *J* = 8.7, 2.4 Hz, 1H), 6.78 (dd, *J* = 5.5, 2.6 Hz, 1H), 6.72 (d, *J* = 2.4 Hz, 1H), 5.95 (s, 1H), 5.74 (s, 1H), 3.72 (s, 3H); <sup>13</sup>C NMR (151 MHz, CDCl<sub>3</sub>) δ 162.43, 156.92, 140.62, 140.11, 136.71, 135.54, 134.66, 134.04, 133.50, 128.92, 128.62, 128.62, 128.40, 127.59, 125.15, 122.45, 120.02, 117.68, 114.40, 114.02, 105.97, 55.82; **IR** (neat):  $\nu_{\max}$  = 2970, 1739, 1367, 1217, 918, 702, 541 cm<sup>-1</sup>; **HRMS** *m/z* (EI) calc. for C<sub>24</sub>H<sub>17</sub>NO<sub>2</sub> [M<sup>+</sup>] 351.1259, found 351.1260; **R<sub>f</sub>** 0.54 (Hexane:EA, 4:1).

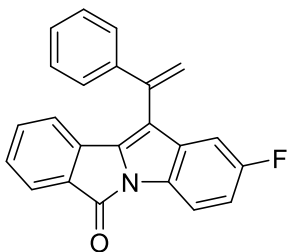

2-fluoro-11-(1-phenylvinyl)-6*H*-isoindolo[2,1-*a*]indol-6-one, **3da**: yellow solid (137 mg, 81% yield); melting point 183~185 °C; <sup>1</sup>H NMR (600 MHz, CDCl<sub>3</sub>) δ 7.87 (dd, *J* = 8.8, 4.5 Hz, 1H), 7.76-7.72 (m, 1H), 7.54-7.49 (m, 2H), 7.39-7.35 (m, 3H), 7.30-7.25 (m, 2H), 7.02 (td, *J* = 8.8, 2.5 Hz, 1H), 6.90 (dd, *J* = 9.2, 2.4 Hz, 1H), 6.84-6.79 (m, 1H), 5.95 (d, *J* = 0.9 Hz, 1H), 5.72 (d, *J* = 0.9 Hz, 1H); <sup>13</sup>C NMR (151 MHz, CDCl<sub>3</sub>) δ 162.51, 160.11 (d, *J* = 240.5 Hz), 140.34, 139.88, 137.39, 135.64 (d, *J* = 9.6 Hz), 134.53, 133.82, 130.12 (d, *J* = 1.0 Hz), 129.04, 129.03, 128.82, 127.57, 125.43, 122.78, 119.77 (d, *J* = 4.0 Hz), 117.95, 114.28 (d, *J* = 25.4 Hz), 114.21, 114.14 (d, *J* = 9.3 Hz), 108.39 (d, *J* = 25.1 Hz); <sup>19</sup>F NMR (564 MHz, CDCl<sub>3</sub>) δ -118.35; IR (neat): ν<sub>max</sub> = 3461, 2970, 1738, 1366, 1217, 765, 705, 530 cm<sup>-1</sup>; HRMS *m/z* (EI) calc. for C<sub>23</sub>H<sub>14</sub>FNO [M<sup>+</sup>] 339.1050, found 339.1057; *R<sub>f</sub>* 0.61 (Hexane:EA, 4:1).

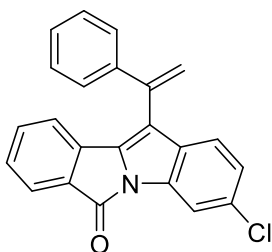

3-chloro-11-(1-phenylvinyl)-6*H*-isoindolo[2,1-*a*]indol-6-one, **3ea**: yellow solid (149 mg, 84% yield); melting point 182~184 °C; <sup>1</sup>H NMR (600 MHz, CDCl<sub>3</sub>) δ 7.96 (d, *J* = 1.6 Hz, 1H), 7.75 (dd, *J* = 6.2, 2.0 Hz, 1H), 7.50 (dd, *J* = 6.5, 3.0 Hz, 2H), 7.39-7.35 (m, 3H), 7.32-7.27 (m, 2H), 7.11 (d, *J* = 8.4 Hz, 1H), 7.05 (dd, *J* = 8.4, 1.8 Hz, 1H), 6.85 (dd, *J* = 6.2, 1.8 Hz, 1H), 5.95 (s, 1H), 5.72 (s, 1H); <sup>13</sup>C NMR (151 MHz, CDCl<sub>3</sub>) δ 162.57, 140.31, 139.94, 136.21, 134.60, 134.04, 133.98, 133.61, 133.01, 132.84, 129.01, 128.96, 128.79, 127.58, 125.56, 124.50, 122.89, 122.76, 119.82, 118.03, 113.82; IR (neat): ν<sub>max</sub> = 2970, 1739, 1440, 1366, 1229, 1217, 900, 528 cm<sup>-1</sup>; HRMS *m/z* (EI) calc. for C<sub>23</sub>H<sub>14</sub>ClNO [M<sup>+</sup>] 355.0764, found 355.0760; *R<sub>f</sub>* 0.63 (Hexane:EA, 4:1).

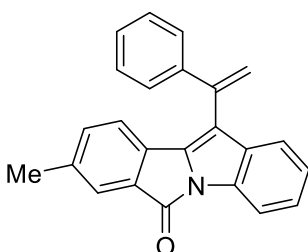

8-methyl-11-(1-phenylvinyl)-6*H*-isoindolo[2,1-*a*]indol-6-one, **3fa**: yellow solid (147 mg, 88% yield); melting point 168~170 °C; <sup>1</sup>H NMR (600 MHz, CDCl<sub>3</sub>) δ 7.95 (d, *J* = 7.8 Hz, 1H), 7.61 (d, *J* = 7.8 Hz, 1H), 7.54 (dd, *J* = 4.2, 2.8 Hz, 2H), 7.40-7.37 (m, 3H), 7.31-7.28 (m, 1H), 7.27 (d, *J* = 8.2 Hz, 1H), 7.10 (t, *J* = 8.2 Hz, 1H), 7.05 (t, *J* = 8.2 Hz, 1H), 6.52 (s, 1H), 5.95 (d, *J* = 1.1 Hz, 1H), 5.77 (d, *J* = 1.1 Hz, 1H), 2.20 (s, 3H); <sup>13</sup>C NMR (151 MHz, CDCl<sub>3</sub>) δ 162.84, 144.56, 140.75, 140.43, 135.91, 134.92, 134.35, 133.80, 131.35, 129.39, 128.90, 128.49, 127.74, 126.66, 125.09, 123.84, 123.48, 122.07, 119.86, 117.76, 113.41, 22.09; IR (neat): ν<sub>max</sub> = 3057, 1731, 1451, 1128, 777, 690 cm<sup>-1</sup>; HRMS *m/z* (EI) calc. for C<sub>24</sub>H<sub>17</sub>NO [M<sup>+</sup>] 335.1316, found 335.1308; *R<sub>f</sub>* 0.63 (Hexane:EA, 4:1).

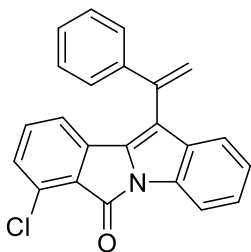

7-chloro-11-(1-phenylvinyl)-6*H*-isoindolo[2,1-*a*]indol-6-one, **3ga**: yellow solid (149 mg, 84% yield); melting point 181~183 °C; <sup>1</sup>H NMR (600 MHz, CDCl<sub>3</sub>) δ 7.96 (d, *J* = 8.0 Hz, 1H), 7.50 (dd, *J* = 6.6, 3.0 Hz, 2H), 7.39-7.34 (m, 3H), 7.31 (dt, *J* = 7.7, 0.8 Hz, 1H), 7.26 (d, *J* = 7.7 Hz, 1H), 7.17-7.13 (m, 2H), 7.11 (dt, *J* = 7.7, 0.8 Hz, 1H), 6.70 (dd, *J* = 5.2, 3.3 Hz, 1H), 5.97 (d, *J* = 0.9 Hz, 1H), 5.74 (d, *J* = 0.9 Hz, 1H); <sup>13</sup>C NMR (151 MHz, CDCl<sub>3</sub>) δ 160.23, 140.32, 140.02, 136.78, 134.44, 134.36, 133.80, 133.72, 133.09, 130.29, 129.36, 128.97, 128.70, 127.51, 127.20, 124.27, 122.24, 121.05, 120.88, 118.21, 113.63; IR (neat): ν<sub>max</sub> = 3060, 2970, 1739, 1380, 1217, 912, 737, 704 cm<sup>-1</sup>; HRMS *m/z* (EI) calc. for C<sub>23</sub>H<sub>14</sub>ClNO [M<sup>+</sup>] 355.0764, found 355.0766; *R*<sub>f</sub> 0.61 (Hexane:EA, 4:1).

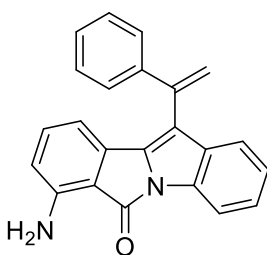

10-amino-11-(1-phenylvinyl)-6*H*-isoindolo[2,1-*a*]indol-6-one, **3ha**: yellow solid (126 mg, 75% yield); melting point 193~195 °C; <sup>1</sup>H NMR (600 MHz, CDCl<sub>3</sub>) δ 7.92 (d, *J* = 8.1 Hz, 1H), 7.51 (dd, *J* = 6.4, 3.2 Hz, 2H), 7.38-7.34 (m, 3H), 7.29 (t, *J* = 7.6 Hz, 1H), 7.22 (d, *J* = 7.8 Hz, 1H), 7.08 (t, *J* = 7.6 Hz, 1H), 7.00 (t, *J* = 7.8 Hz, 1H), 6.43 (d, *J* = 8.1 Hz, 1H), 6.22 (d, *J* = 7.4 Hz, 1H), 5.93 (d, *J* = 1.1 Hz, 1H), 5.73 (d, *J* = 1.1 Hz, 1H), 5.23 (s, 2H); <sup>13</sup>C NMR (151 MHz, CDCl<sub>3</sub>) δ 164.78, 147.32, 140.78, 140.24, 136.02, 135.23, 134.96, 134.32, 133.43, 128.82, 128.47, 127.57, 126.36, 123.49, 122.03, 119.54, 117.64, 116.08, 114.16, 113.07, 112.26; IR (neat): ν<sub>max</sub> = 3451, 3016, 2970, 1739, 1366, 1229, 528 cm<sup>-1</sup>; *R*<sub>f</sub> 0.39 (Hexane:EA, 4:1).

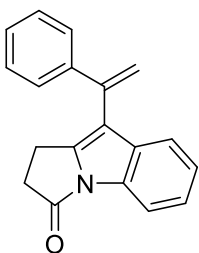

9-(1-phenylvinyl)-1,2-dihydro-3*H*-pyrrolo[1,2-*a*]indol-3-one, **3ia**: colorless solid (104 mg 76% yield), ; melting point 110~112 °C; <sup>1</sup>H NMR (600 MHz, CDCl<sub>3</sub>) δ 8.12 (d, *J* = 7.9 Hz, 1H), 7.43-7.38 (m, 3H), 7.38-7.34 (m, 3H), 7.32-7.29 (m, 1H), 7.26-7.23 (m, 1H), 5.65 (d, *J* = 1.2 Hz, 1H), 5.57 (d, *J* = 1.2 Hz, 1H), 3.03-2.99 (m, 2H), 2.82-2.79 (m, 2H); <sup>13</sup>C NMR (151 MHz, CDCl<sub>3</sub>) δ 171.79, 141.94, 141.50, 140.98, 134.37, 130.80, 128.56, 128.15, 127.85, 124.31, 123.73, 120.70, 115.25, 114.74, 113.85, 34.78, 20.16; IR (neat): ν<sub>max</sub> = 3053, 2937, 1739, 1453, 1179, 751, 703 cm<sup>-1</sup>; *R*<sub>f</sub> 0.47 (Hexane:EA, 4:1).

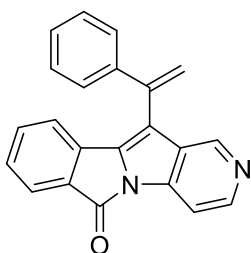

11-(1-phenylvinyl)-6*H*-pyrido[3',4':4,5]pyrrolo[2,1-*a*]isoindol-6-one, **3ja**: pale yellow solid (85 mg, 53% yield); melting point 178~180 °C; <sup>1</sup>H NMR (600 MHz, CDCl<sub>3</sub>) δ 8.54 (s, 1H), 8.49 (d, *J* = 5.3 Hz, 1H), 7.83 (d, *J* = 5.3 Hz, 1H), 7.82-7.76 (m, 1H), 7.51 (dd, *J* = 6.6, 3.1 Hz, 2H), 7.40-7.35 (m, 3H), 7.35-7.30 (m, 2H), 6.82-6.79 (m, 1H), 5.98 (d, *J* = 0.8 Hz, 1H), 5.80 (d, *J* = 0.8 Hz, 1H);

$^{13}\text{C}$  NMR (151 MHz,  $\text{CDCl}_3$ )  $\delta$  162.69, 146.69, 144.44, 139.98, 139.87, 138.01, 136.11, 134.41, 134.33, 133.45, 130.66, 129.40, 129.13, 128.95, 127.62, 125.77, 123.28, 118.83, 118.53, 108.36; IR (neat):  $\nu_{\text{max}}$  = 2927, 1721, 1368, 1181, 1000, 764, 701  $\text{cm}^{-1}$ ; HRMS  $m/z$  (EI) calc. for  $\text{C}_{22}\text{H}_{14}\text{N}_2\text{O}$  [ $\text{M}^+$ ] 322.1106, found 322.1107;  $R_f$  0.54 (Hexane:EA, 1:1).

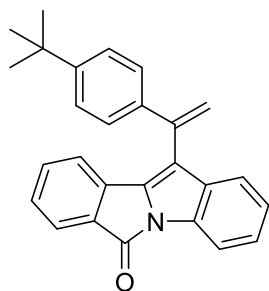

11-(1-(4-(tert-butyl)phenyl)vinyl)-6H-isoindolo[2,1-a]indol-6-one, **3ab**: yellow solid (143 mg, 76% yield); melting point 201~203  $^{\circ}\text{C}$ ;  $^1\text{H}$  NMR (600 MHz,  $\text{CDCl}_3$ )  $\delta$  7.96 (d,  $J$  = 8.0 Hz, 1H), 7.74 (dd,  $J$  = 6.2, 1.9 Hz, 1H), 7.46 (d,  $J$  = 8.5 Hz, 2H), 7.39 (d,  $J$  = 8.5 Hz, 2H), 7.31 (t,  $J$  = 6.9 Hz, 2H), 7.24 (td,  $J$  = 7.3, 1.1 Hz, 1H), 7.22 (td,  $J$  = 7.3, 1.4 Hz, 1H), 7.12 (t,  $J$  = 7.6 Hz, 1H), 6.69 (dd,  $J$  = 6.3, 1.7 Hz, 1H), 5.93 (d,  $J$  = 1.1 Hz, 1H), 5.71 (d,  $J$  = 1.1 Hz, 1H), 1.35 (s, 9H);  $^{13}\text{C}$  NMR (151 MHz,  $\text{CDCl}_3$ )  $\delta$  162.78, 151.85, 140.36, 137.39, 135.82, 134.77, 134.60, 133.99, 133.81, 133.55, 128.62, 127.34, 126.80, 125.84, 125.22, 124.04, 122.82, 122.25, 120.54, 117.07, 113.53, 34.85, 31.52; IR (neat):  $\nu_{\text{max}}$  = 2969, 1721, 1443, 1365, 1217, 748  $\text{cm}^{-1}$ ; HRMS  $m/z$  (EI) calc. for  $\text{C}_{27}\text{H}_{23}\text{NO}$  [ $\text{M}^+$ ] 377.1780, found 377.1777;  $R_f$  0.62 (Hexane:EA, 4/1).

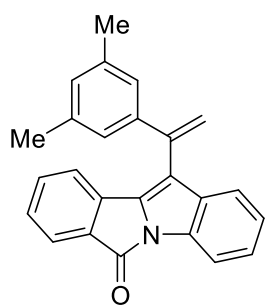

11-(1-(3,5-dimethylphenyl)vinyl)-6H-isoindolo[2,1-a]indol-6-one, **3ac**: yellow solid (141 mg, 81% yield); melting point 195~197  $^{\circ}\text{C}$ ;  $^1\text{H}$  NMR (600 MHz,  $\text{CDCl}_3$ )  $\delta$  7.96 (d,  $J$  = 8.0 Hz, 1H), 7.75 (d,  $J$  = 7.2 Hz, 1H), 7.32-7.28 (m, 2H), 7.28-7.23 (m, 2H), 7.14 (s, 2H), 7.10 (t,  $J$  = 7.6 Hz, 1H), 7.01 (s, 1H), 6.92 (d,  $J$  = 7.2 Hz, 1H), 5.92 (d,  $J$  = 1.2 Hz, 1H), 5.70 (d,  $J$  = 1.2 Hz, 1H), 2.30 (s, 6H);  $^{13}\text{C}$  NMR (151 MHz,  $\text{CDCl}_3$ )  $\delta$  162.78, 140.79, 140.08, 138.40, 135.78, 134.82, 134.67, 134.02, 133.79, 133.68, 130.26, 128.62, 126.74, 125.38, 125.25, 124.01, 122.69, 122.28, 120.55, 117.50, 113.48, 21.53; IR (neat):  $\nu_{\text{max}}$  = 3016, 1737, 1441, 1365, 1229, 751  $\text{cm}^{-1}$ ; HRMS  $m/z$  (EI) calc. for  $\text{C}_{25}\text{H}_{19}\text{NO}$  [ $\text{M}^+$ ] 349.1467, found 349.1464;  $R_f$  0.60 (Hexane:EA, 4:1).

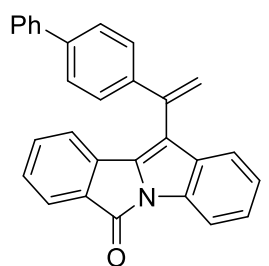

11-(1-([1,1'-biphenyl]-4-yl)vinyl)-6H-isoindolo[2,1-a]indol-6-one, **3ad**: yellow solid (168 mg, 85% yield); melting point 187~189  $^{\circ}\text{C}$ ;  $^1\text{H}$  NMR (600 MHz,  $\text{CDCl}_3$ )  $\delta$  7.98 (d,  $J$  = 8.0 Hz, 1H), 7.77 (d,  $J$  = 6.5 Hz, 1H), 7.67-7.57 (m, 6H), 7.46 (t,  $J$  = 7.7 Hz, 2H), 7.37 (t,  $J$  = 7.4 Hz, 1H), 7.32 (t,  $J$  = 7.6 Hz, 1H), 7.30-7.24 (m, 3H), 7.12 (t,  $J$  = 7.6 Hz, 1H), 6.94 (d,  $J$  = 7.7 Hz, 1H), 6.02 (s, 1H), 5.77 (s, 1H);  $^{13}\text{C}$  NMR (151 MHz,  $\text{CDCl}_3$ )  $\delta$  162.77, 141.36, 140.57, 140.11, 138.96, 135.94, 134.71, 134.55, 134.00, 133.80, 133.72, 129.04, 128.75, 127.99, 127.74, 127.55, 127.17, 126.86, 125.35, 124.08, 122.67, 122.21, 120.13, 117.74, 113.56; IR (neat):  $\nu_{\text{max}}$  = 2969, 1721,



1443, 1365, 1217, 748  $\text{cm}^{-1}$ ; **HRMS**  $m/z$  (EI) calc. for  $\text{C}_{29}\text{H}_{19}\text{NO}$  [ $\text{M}^+$ ] 397.1467, found 397.1465;  $R_f$  0.56 (Hexane:EA, 4:1).

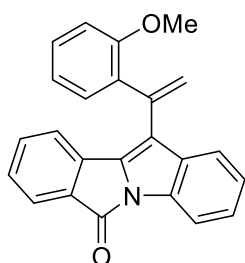

11-(1-(2-methoxyphenyl)vinyl)-6*H*-isoindolo[2,1-*a*]indol-6-one, **3ae**: yellow-orange solid (163 mg, 93% yield); melting point 152~154  $^{\circ}\text{C}$ ;  **$^1\text{H}$  NMR (600 MHz,  $\text{CDCl}_3$ )**  $\delta$  7.93 (d,  $J = 8.0$  Hz, 1H), 7.73 (d,  $J = 7.5$  Hz, 1H), 7.44 (dd,  $J = 7.5, 1.7$  Hz, 1H), 7.35 (td,  $J = 8.0, 1.7$  Hz, 1H), 7.30-7.25 (m, 2H), 7.26-7.22 (m, 2H), 7.07 (t,  $J = 7.5$  Hz, 1H), 7.02 (t,  $J = 7.5$  Hz, 1H), 6.91 (t,  $J = 7.5$  Hz, 2H), 5.89 (s, 2H), 3.59 (s, 3H);  **$^{13}\text{C}$  NMR (151 MHz,  $\text{CDCl}_3$ )**  $\delta$  162.82, 157.68, 138.27, 134.98, 134.60, 134.51, 134.02, 133.74, 133.61, 130.87, 130.21, 129.90, 128.38, 126.57, 125.18, 123.92, 122.50, 122.06, 121.99, 121.15, 120.67, 113.41, 111.89, 55.95; **IR (neat)**:  $\nu_{\text{max}} = 2838, 1709, 1362, 1016, 758, 740$   $\text{cm}^{-1}$ ; **HRMS**  $m/z$  (EI) calc. for  $\text{C}_{24}\text{H}_{17}\text{NO}_2$  [ $\text{M}^+$ ] 351.1259, found 351.1257;  $R_f$  0.50 (Hexane:EA, 4:1).

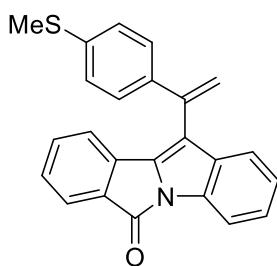

11-(1-(4-(methylthio)phenyl)vinyl)-6*H*-isoindolo[2,1-*a*]indol-6-one, **3af**: yellow solid (167 mg, 91% yield); melting point 167~169  $^{\circ}\text{C}$ ;  **$^1\text{H}$  NMR (600 MHz,  $\text{CDCl}_3$ )**  $\delta$  7.95 (d,  $J = 8.0$  Hz, 1H), 7.74 (d,  $J = 7.4$  Hz, 1H), 7.44 (d,  $J = 8.5$  Hz, 2H), 7.30 (t,  $J = 7.2$  Hz, 2H), 7.26 (d,  $J = 7.4$  Hz, 1H), 7.25-7.20 (m, 3H), 7.09 (t,  $J = 7.4$  Hz, 1H), 6.94 (d,  $J = 7.5$  Hz, 1H), 5.93 (s, 1H), 5.69 (s, 1H), 2.49 (s, 3H);  **$^{13}\text{C}$  NMR (151 MHz,  $\text{CDCl}_3$ )**  $\delta$  162.64, 139.81, 139.29, 136.61, 135.84, 134.62, 134.45, 133.92, 133.70(2C), 128.69, 127.86, 126.78, 126.54, 125.28, 124.00, 122.57, 122.14, 119.98, 117.14, 113.48, 15.73; **IR (neat)**:  $\nu_{\text{max}} = 2970, 1738, 1366, 1217, 748, 541$   $\text{cm}^{-1}$ ; **HRMS**  $m/z$  (EI) calc. for  $\text{C}_{24}\text{H}_{17}\text{NOS}$  [ $\text{M}^+$ ] 367.1031, found 367.1034;  $R_f$  0.53 (Hexane:EA, 4/1).

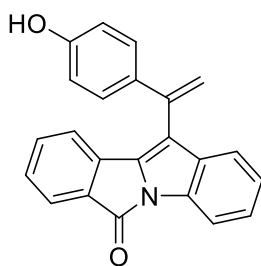

11-(1-(4-hydroxyphenyl)vinyl)-6*H*-isoindolo[2,1-*a*]indol-6-one, **3ag**: orange solid (128 mg, 76% yield); melting point 246~248  $^{\circ}\text{C}$ ;  **$^1\text{H}$  NMR (600 MHz,  $\text{DMSO-}d_6$ )**  $\delta$  9.67 (bs, 1H), 7.81 (d,  $J = 7.9$  Hz, 1H), 7.73 (d,  $J = 7.2$  Hz, 1H), 7.44 (t,  $J = 7.7$  Hz, 1H), 7.37 (t,  $J = 7.9$  Hz, 1H), 7.35-7.30 (m, 3H), 7.21 (d,  $J = 7.6$  Hz, 1H), 7.14 (t,  $J = 7.4$  Hz, 1H), 6.87 (d,  $J = 7.6$  Hz, 1H), 6.77 (d,  $J = 8.3$  Hz, 2H), 5.87 (s, 1H), 5.56 (s, 1H);  **$^{13}\text{C}$  NMR (151 MHz,  $\text{DMSO-}d_6$ )**  $\delta$  161.71, 157.80, 138.92, 135.03, 134.05, 133.86, 133.80, 132.94, 132.87, 130.10, 129.02, 128.35, 126.69, 124.98, 123.93, 122.27, 121.84, 119.78, 115.49, 115.43, 112.61; **IR (neat)**:  $\nu_{\text{max}} = 3459, 3016, 2970, 1739, 1367, 1217, 756$   $\text{cm}^{-1}$ ; **HRMS**  $m/z$  (EI) calc. for  $\text{C}_{23}\text{H}_{15}\text{NO}_2$  [ $\text{M}^+$ ] 337.1103, found 337.1101;  $R_f$  0.38 (Hexane:EA, 2:1).

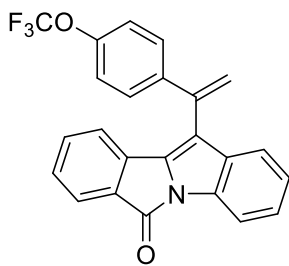

11-(1-(4-(trifluoromethoxy)phenyl)vinyl)-6*H*-isoindolo[2,1-*a*]indol-6-one, **3ah**: yellow solid (176 mg, 87% yield); melting point 149~151 °C; <sup>1</sup>H NMR (600 MHz, CDCl<sub>3</sub>) δ 7.96 (d, *J* = 8.0 Hz, 1H), 7.77-7.73 (m, 1H), 7.56 (d, *J* = 8.7 Hz, 2H), 7.31 (td, *J* = 7.8, 0.8 Hz, 1H), 7.29-7.26 (m, 2H), 7.24-7.21 (m, 3H), 7.11 (td, *J* = 8.3, 7.8, 0.8 Hz, 1H), 6.81 (dd, *J* = 5.9, 2.7 Hz, 1H), 5.96 (d, *J* = 1.3 Hz, 1H), 5.78 (d, *J* = 1.3 Hz, 1H); <sup>13</sup>C NMR (151 MHz, CDCl<sub>3</sub>) δ 162.70, 149.49, 139.39, 138.89, 135.99, 134.53, 134.26, 133.99, 133.77, 133.75, 129.06, 128.93, 126.98, 125.47, 124.16, 122.46, 121.98, 121.39, 120.67 (q, *J* = 257.5 Hz), 119.51, 118.58, 113.63; <sup>19</sup>F NMR (564 MHz, CDCl<sub>3</sub>) δ -60.38; IR (neat): ν<sub>max</sub> = 3460, 2970, 1738, 1366, 1217, 742 cm<sup>-1</sup>; HRMS *m/z* (EI) calc. for C<sub>24</sub>H<sub>14</sub>F<sub>3</sub>NO<sub>2</sub> [M<sup>+</sup>] 405.0977, found 405.0977; *R*<sub>f</sub> 0.57 (Hexane:EA, 4:1).

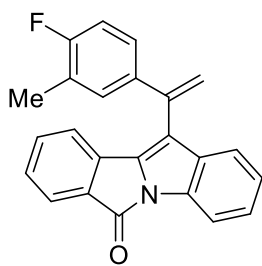

11-(1-(4-fluoro-3-methylphenyl)vinyl)-6*H*-isoindolo[2,1-*a*]indol-6-one, **3ai**: yellow solid (153 mg, 87% yield); melting point 175~177 °C; <sup>1</sup>H NMR (600 MHz, CDCl<sub>3</sub>) δ 7.95 (d, *J* = 8.0 Hz, 1H), 7.75 (d, *J* = 7.4 Hz, 1H), 7.36 (dd, *J* = 7.4, 1.6 Hz, 1H), 7.33-7.28 (m, 3H), 7.28-7.25 (m, 1H), 7.21 (d, *J* = 8.0 Hz, 1H), 7.10 (t, *J* = 7.6 Hz, 1H), 7.00 (t, *J* = 8.9 Hz, 1H), 6.93 (d, *J* = 7.6 Hz, 1H), 5.88 (s, 1H), 5.70 (s, 1H), 2.27 (s, 3H); <sup>13</sup>C NMR (151 MHz, CDCl<sub>3</sub>) δ 162.67, 161.66 (d, *J* = 246.9 Hz), 139.71, 135.94 (d, *J* = 3.6 Hz), 135.83, 134.64, 134.43, 133.97, 133.75, 133.72, 130.57 (d, *J* = 5.3 Hz), 128.75, 126.82, 126.62 (d, *J* = 8.1 Hz), 125.34, 125.32 (d, *J* = 17.6 Hz), 124.03, 122.52, 122.12, 120.06, 117.42, 115.42 (d, *J* = 22.6 Hz), 113.52, 14.81 (d, *J* = 3.4 Hz); <sup>19</sup>F NMR (564 MHz, CDCl<sub>3</sub>) δ -117.51; IR (neat): ν<sub>max</sub> = 2970, 1739, 1366, 1217, 899, 528 cm<sup>-1</sup>; HRMS *m/z* (EI) calc. for C<sub>24</sub>H<sub>16</sub>FNO [M<sup>+</sup>] 353.1216, found 353.1217; *R*<sub>f</sub> 0.62 (Hexane:EA, 4:1).

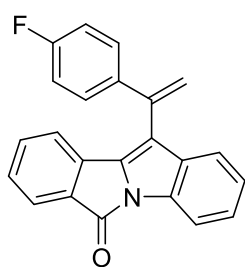

11-(1-(4-fluorophenyl)vinyl)-6*H*-isoindolo[2,1-*a*]indol-6-one, **3aj**: yellow solid (152 mg, 90% yield); melting point 175~177 °C; <sup>1</sup>H NMR (600 MHz, CDCl<sub>3</sub>) δ 7.95 (d, *J* = 8.0 Hz, 1H), 7.75 (d, *J* = 7.4 Hz, 1H), 7.50 (dd, *J* = 8.8, 5.4 Hz, 2H), 7.31 (t, *J* = 7.6 Hz, 2H), 7.30-7.24 (m, 1H), 7.20 (d, *J* = 7.8 Hz, 1H), 7.10 (t, *J* = 7.6 Hz, 1H), 7.06 (t, *J* = 8.8 Hz, 2H), 6.89 (d, *J* = 7.4 Hz, 1H), 5.90 (s, 1H), 5.72 (s, 1H); <sup>13</sup>C NMR (151 MHz, CDCl<sub>3</sub>) δ 163.10 (d, *J* = 248.3 Hz), 162.72, 139.55, 136.26 (d, *J* = 3.3 Hz), 135.91, 134.61, 134.38, 134.00, 133.78, 129.30 (d, *J* = 8.1 Hz), 128.84, 126.92, 125.43, 124.10, 122.51, 122.08, 119.92, 117.67 (d, *J* = 1.1 Hz), 115.95, 115.81, 113.59; <sup>19</sup>F NMR (564 MHz, CDCl<sub>3</sub>) δ -113.24; IR (neat): ν<sub>max</sub> = 2970, 1737, 1366, 1217, 752, 578 cm<sup>-1</sup>; HRMS *m/z* (EI) calc. for C<sub>23</sub>H<sub>14</sub>FNO [M<sup>+</sup>] 339.1059, found 339.1057; *R*<sub>f</sub> 0.45 (Hexane:EA, 4:1).

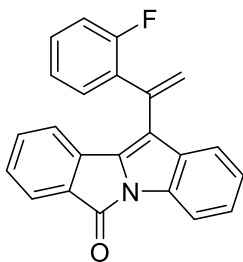

11-(1-(2-fluorophenyl)vinyl)-6H-isoindolo[2,1-a]indol-6-one, **3ak**: yellow solid (120 mg, 71% yield); melting point 161~163 °C; <sup>1</sup>H NMR (600 MHz, CDCl<sub>3</sub>) δ 7.94 (d, *J* = 8.0 Hz, 1H), 7.75 (d, *J* = 7.4 Hz, 1H), 7.44 (td, *J* = 7.7, 1.7 Hz, 1H), 7.34 (dtd, *J* = 9.4, 5.0, 1.7 Hz, 1H), 7.32-7.28 (m, 2H), 7.26 (t, *J* = 7.4 Hz, 1H), 7.21 (d, *J* = 7.9 Hz, 1H), 7.15 (td, *J* = 7.5, 0.8 Hz, 1H), 7.11 (dd, *J* = 10.7, 8.5 Hz, 1H), 7.09 (t, *J* = 7.5 Hz, 1H), 6.94 (d, *J* = 7.4 Hz, 1H), 5.99 (s, 1H), 5.98 (s, 1H); <sup>13</sup>C NMR (151 MHz, CDCl<sub>3</sub>) δ 162.72, 160.55 (d, *J* = 250.5 Hz), 135.30, 135.15, 134.70, 134.17, 134.05, 133.76, 133.73, 130.99 (d, *J* = 3.0 Hz), 130.18 (d, *J* = 8.4 Hz), 128.75, 128.26 (d, *J* = 12.1 Hz), 126.84, 125.41, 124.62 (d, *J* = 3.7 Hz), 124.09, 122.23, 121.96 (d, *J* = 4.4 Hz), 121.79, 120.42, 116.50 (d, *J* = 22.4 Hz), 113.57; <sup>19</sup>F NMR (564 MHz, CDCl<sub>3</sub>) δ -116.41; IR (neat): ν<sub>max</sub> = 2970, 1737, 1366, 1217, 752, 562 cm<sup>-1</sup>; HRMS *m/z* (EI) calc. for C<sub>23</sub>H<sub>14</sub>FNO [M<sup>+</sup>] 339.1059, found 339.1058; *R<sub>f</sub>* 0.52 (Hexane:EA, 4:1).

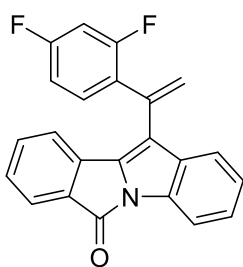

11-(1-(2,4-difluorophenyl)vinyl)-6H-isoindolo[2,1-a]indol-6-one, **3al**: yellow solid (105 mg, 59% yield); melting point 197~199 °C; <sup>1</sup>H NMR (600 MHz, CDCl<sub>3</sub>) δ 7.94 (d, *J* = 7.9 Hz, 1H), 7.76 (d, *J* = 7.4 Hz, 1H), 7.40 (td, *J* = 8.8, 6.6 Hz, 1H), 7.35 (td, *J* = 7.6, 1.2 Hz, 1H), 7.29 (tdd, *J* = 7.4, 2.8, 1.0 Hz, 2H), 7.15 (d, *J* = 7.9 Hz, 1H), 7.09 (td, *J* = 7.6, 1.2 Hz, 1H), 7.04 (d, *J* = 7.6 Hz, 1H), 6.92-6.83 (m, 2H), 5.96 (s, 2H); <sup>13</sup>C NMR (151 MHz, CDCl<sub>3</sub>) δ 162.94 (dd, *J* = 251.1, 12.1 Hz), 162.67, 160.71 (dd, *J* = 254.1, 12.4 Hz), 135.40, 134.63, 134.28, 134.07, 134.04, 133.85, 133.72, 131.83 (dd, *J* = 9.4, 4.5 Hz), 128.90, 126.93, 125.54, 124.45 (dd, *J* = 12.3, 4.0 Hz), 124.14, 122.09, 121.89 (d, *J* = 4.4 Hz), 121.67, 120.08, 113.63, 111.86 (dd, *J* = 20.7, 4.2 Hz), 104.89 (dd, *J* = 26.1, 25.5 Hz); <sup>19</sup>F NMR (564 MHz, CDCl<sub>3</sub>) δ -111.89, -111.97; IR (neat): ν<sub>max</sub> = 2970, 1739, 1366, 1217, 754, 561 cm<sup>-1</sup>; HRMS *m/z* (EI) calc. for C<sub>23</sub>H<sub>13</sub>F<sub>2</sub>NO [M<sup>+</sup>] 357.0965, found 357.0962; *R<sub>f</sub>* 0.55 (Hexane:EA, 4:1).

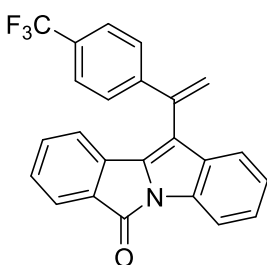

11-(1-(4-(trifluoromethyl)phenyl)vinyl)-6H-isoindolo[2,1-a]indol-6-one, **3am**: yellow solid (171 mg, 88% yield); melting point 177~179 °C; <sup>1</sup>H NMR (600 MHz, CDCl<sub>3</sub>) δ 7.96 (d, *J* = 8.0 Hz, 1H), 7.76 (d, *J* = 7.2 Hz, 1H), 7.69-7.58 (m, 4H), 7.31 (td, *J* = 8.0, 1.4 Hz, 2H), 7.28 (t, *J* = 7.2 Hz, 1H), 7.15 (d, *J* = 7.9 Hz, 1H), 7.10 (t, *J* = 7.9 Hz, 1H), 6.90 (d, *J* = 7.2 Hz, 1H), 6.05 (s, 1H), 5.86 (s, 1H); <sup>13</sup>C NMR (151 MHz, CDCl<sub>3</sub>) δ 162.62, 143.50, 139.54, 136.07, 134.46, 134.15, 133.97, 133.80, 133.72, 130.60 (q, *J* = 32.6 Hz), 128.99, 127.85, 126.99, 125.92 (q, *J* = 3.8 Hz), 125.50, 125.16 (q, *J* = 272.5 Hz), 124.16, 122.27, 121.90, 119.77, 119.06, 113.63; <sup>19</sup>F NMR (564 MHz, CDCl<sub>3</sub>) δ -113.22; IR (neat): ν<sub>max</sub> = 2970, 1737, 1366, 1217, 1111, 745, 529 cm<sup>-1</sup>; HRMS *m/z* (EI) calc. for C<sub>24</sub>H<sub>14</sub>F<sub>3</sub>NO [M<sup>+</sup>] 389.1027, found 389.1025; *R<sub>f</sub>* 0.58 (Hexane:EA, 4:1).

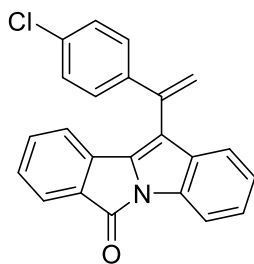

11-(1-(4-chlorophenyl)vinyl)-6H-isoindolo[2,1-a]indol-6-one, **3an**: pale yellow solid (153 mg, 86% yield); melting point 198~200 °C; <sup>1</sup>H NMR (600 MHz, CDCl<sub>3</sub>) δ 7.95 (d, *J* = 1.6 Hz, 1H), 7.75 (dd, *J* = 6.1, 1.8 Hz, 1H), 7.50 (dd, *J* = 6.5, 3.1 Hz, 2H), 7.41-7.34 (m, 3H), 7.32-7.26 (m, 2H), 7.11 (d, *J* = 8.4 Hz, 1H), 7.05 (dd, *J* = 8.4, 1.8 Hz, 1H), 6.84 (dd, *J* = 6.1, 1.6 Hz, 1H), 5.95 (s, 1H), 5.72 (s, 1H); <sup>13</sup>C NMR (151 MHz, CDCl<sub>3</sub>) δ 162.56, 140.31, 139.94, 136.21, 134.59, 134.04, 133.97, 133.60, 133.00, 132.84, 129.01, 128.95, 128.78, 127.58, 125.55, 124.50, 122.89, 122.76, 119.81, 118.03, 113.81; IR (neat): ν<sub>max</sub> = 2970, 1739, 1440, 1366, 1217, 703 cm<sup>-1</sup>; HRMS m/z (EI) calc. for C<sub>23</sub>H<sub>14</sub>ClNO [M<sup>+</sup>] 355.0764, found 355.0761; R<sub>f</sub> 0.58 (Hexane:EA, 4:1).

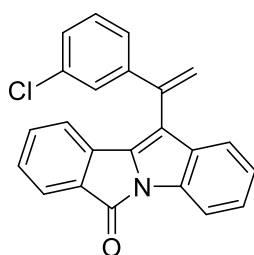

11-(1-(3-chlorophenyl)vinyl)-6H-isoindolo[2,1-a]indol-6-one, **3ao**: yellow solid (151 mg, 85% yield); melting point 162~164 °C; <sup>1</sup>H NMR (600 MHz, CDCl<sub>3</sub>) δ 7.96 (d, *J* = 8.0 Hz, 1H), 7.76 (d, *J* = 7.2 Hz, 1H), 7.54 (t, *J* = 1.7 Hz, 1H), 7.38 (dt, *J* = 7.8, 1.2 Hz, 1H), 7.34 (ddd, *J* = 8.0, 2.0, 1.1 Hz, 1H), 7.33-7.27 (m, 4H), 7.18 (d, *J* = 7.8 Hz, 1H), 7.10 (t, *J* = 7.6 Hz, 1H), 6.94 (d, *J* = 7.6 Hz, 1H), 5.97 (d, *J* = 0.9 Hz, 1H), 5.78 (d, *J* = 0.9 Hz, 1H); <sup>13</sup>C NMR (151 MHz, CDCl<sub>3</sub>) δ 162.71, 141.95, 139.50, 136.03, 134.96, 134.56, 134.30, 134.02, 133.83, 133.76, 130.20, 128.93, 128.71, 127.48, 126.96, 125.85, 125.49, 124.16, 122.42, 121.99, 119.31, 118.96, 113.62; IR (neat): ν<sub>max</sub> = 2970, 1737, 1367, 1217, 915, 739, cm<sup>-1</sup>; HRMS m/z (EI) calc. for C<sub>23</sub>H<sub>14</sub>ClNO [M<sup>+</sup>] 355.0764, found 355.0765; R<sub>f</sub> 0.57 (Hexane:EA, 4:1).

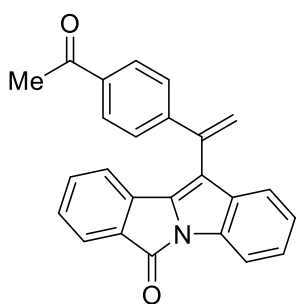

11-(1-(4-acetylphenyl)vinyl)-6H-isoindolo[2,1-a]indol-6-one, **3ap**: yellow solid (149 mg, 82% yield); melting point 190~192 °C; <sup>1</sup>H NMR (600 MHz, CDCl<sub>3</sub>) δ 7.94 (t, *J* = 8.7 Hz, 3H), 7.73 (d, *J* = 6.9 Hz, 1H), 7.60 (d, *J* = 8.4 Hz, 2H), 7.31-7.23 (m, 3H), 7.14 (d, *J* = 7.9 Hz, 1H), 7.07 (t, *J* = 7.9 Hz, 1H), 6.89 (d, *J* = 6.9 Hz, 1H), 6.05 (s, 1H), 5.85 (s, 1H), 2.60 (s, 3H); <sup>13</sup>C NMR (151 MHz, CDCl<sub>3</sub>) δ 197.65, 162.57, 144.46, 139.70, 136.94, 135.98, 134.42, 134.20, 133.90, 133.77, 133.66, 128.97, 128.88, 127.66, 126.91, 125.41, 124.08, 122.30, 121.88, 119.83, 119.13, 113.55, 26.82; IR (neat): ν<sub>max</sub> = 2970, 1738, 1366, 1229, 1217, 737 cm<sup>-1</sup>; HRMS m/z (EI) calc. for C<sub>24</sub>H<sub>17</sub>NO<sub>2</sub> [M<sup>+</sup>] 363.1259, found 363.1261; R<sub>f</sub> 0.33 (Hexane:EA, 4:1).

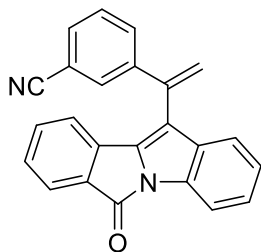

3-(1-(6-oxo-6H-isoindolo[2,1-a]indol-11-yl)vinyl)benzonitrile, **3aq**: yellow solid (81 mg, 47% yield); melting point 201~203 °C;  $^1\text{H NMR}$  (600 MHz,  $\text{CDCl}_3$ )  $\delta$  7.95 (d,  $J = 8.0$  Hz, 1H), 7.84 (s, 1H), 7.77 (d,  $J = 7.4$  Hz, 1H), 7.73 (d,  $J = 8.0$  Hz, 1H), 7.65 (d,  $J = 7.8$  Hz, 1H), 7.47 (t,  $J = 7.8$  Hz, 1H), 7.35-7.28 (m, 3H), 7.12-7.07 (m, 2H), 6.93 (d,  $J = 6.9$  Hz, 1H), 6.02 (s, 1H), 5.86 (s, 1H);  $^{13}\text{C NMR}$  (151 MHz,  $\text{CDCl}_3$ )  $\delta$  162.56, 141.26, 138.80, 136.17, 134.33, 133.98, 133.96, 133.86, 133.70, 132.02, 131.84, 130.91, 129.83, 129.12, 127.08, 125.63, 124.22, 122.11, 121.71, 119.90, 118.68, 118.44, 113.69, 113.26; **IR** (neat):  $\nu_{\text{max}} = 2970, 1728, 1366, 1217, 913, 741$   $\text{cm}^{-1}$ ; **HRMS**  $m/z$  (EI) calc. for  $\text{C}_{24}\text{H}_{14}\text{N}_2\text{O}$  [ $\text{M}^+$ ] 346.1106, found 346.1103;  $R_f$  0.54 (Hexane:EA, 2:1).

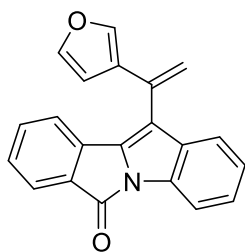

11-(1-(furan-3-yl)vinyl)-6H-isoindolo[2,1-a]indol-6-one, **3ar**: yellow solid (135 mg, 87% yield); melting point 138~140 °C;  $^1\text{H NMR}$  (600 MHz,  $\text{CDCl}_3$ )  $\delta$  7.94 (d,  $J = 8.0$  Hz, 1H), 7.76 (d,  $J = 7.5$  Hz, 1H), 7.47 (t,  $J = 1.8$  Hz, 1H), 7.40 (d,  $J = 8.0$  Hz, 1H), 7.39-7.36 (m, 2H), 7.31 (t,  $J = 6.5$  Hz, 1H), 7.29 (t,  $J = 6.5$  Hz, 1H), 7.19 (d,  $J = 7.6$  Hz, 1H), 7.14 (t,  $J = 7.6$  Hz, 1H), 6.68 (dd,  $J = 1.8, 0.9$  Hz, 1H), 5.85 (d,  $J = 0.9$  Hz, 1H), 5.53 (d,  $J = 0.9$  Hz, 1H);  $^{13}\text{C NMR}$  (151 MHz,  $\text{CDCl}_3$ )  $\delta$  162.74, 143.95, 141.67, 135.41, 134.69, 134.32, 133.99, 133.78, 133.69, 131.32, 128.79, 126.92, 125.81, 125.40, 124.04, 122.83, 122.00, 119.51, 115.84, 113.56, 108.85; **IR** (neat):  $\nu_{\text{max}} = 2970, 1737, 1374, 1229, 904, 730, 597$   $\text{cm}^{-1}$ ; **HRMS**  $m/z$  (EI) calc. for  $\text{C}_{21}\text{H}_{13}\text{NO}_2$  [ $\text{M}^+$ ] 311.0946, found 311.0947;  $R_f$  0.50 (Hexane:EA, 4:1).

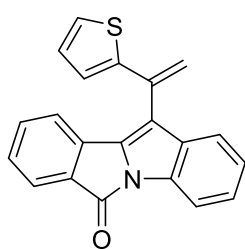

11-(1-(thiophen-2-yl)vinyl)-6H-isoindolo[2,1-a]indol-6-one, **3as**: yellow solid (114 mg, 70% yield); melting point 162~164 °C;  $^1\text{H NMR}$  (600 MHz,  $\text{CDCl}_3$ )  $\delta$  7.95 (d,  $J = 8.0$  Hz, 1H), 7.75 (d,  $J = 7.4$  Hz, 1H), 7.37-7.33 (m, 2H), 7.34-7.30 (m, 3H), 7.28 (dd,  $J = 2.6, 1.1$  Hz, 1H), 7.28-7.25 (m, 1H), 7.16-7.11 (m, 1H), 6.90 (d,  $J = 7.6$  Hz, 1H), 5.95 (d,  $J = 1.1$  Hz, 1H), 5.63 (d,  $J = 1.1$  Hz, 1H);  $^{13}\text{C NMR}$  (151 MHz,  $\text{CDCl}_3$ )  $\delta$  162.78, 141.60, 135.65, 135.03, 134.73, 134.43, 133.98, 133.76, 133.75, 128.75, 126.90, 126.59, 126.54, 125.34, 124.08, 123.84, 122.82, 122.06, 120.12, 116.50, 113.57; **IR** (neat):  $\nu_{\text{max}} = 2970, 1738, 1366, 1217, 884, 751$   $\text{cm}^{-1}$ ; **HRMS**  $m/z$  (EI) calc. for  $\text{C}_{21}\text{H}_{13}\text{NOS}$  [ $\text{M}^+$ ] 327.0718, found 327.0720;  $R_f$  0.58 (Hexane:EA, 4:1).

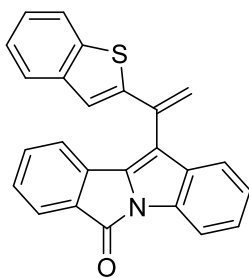

11-(1-(benzo[b]thiophen-2-yl)vinyl)-6*H*-isoindolo[2,1-*a*]indol-6-one, **3at**: yellow solid (130 mg, 69% yield); melting point 197~199 °C; <sup>1</sup>H NMR (600 MHz, CDCl<sub>3</sub>) δ 7.98 (d, *J* = 8.0 Hz, 1H), 7.82 (d, *J* = 8.0 Hz, 1H), 7.78 (d, *J* = 7.2 Hz, 1H), 7.60 (d, *J* = 7.6 Hz, 1H), 7.39 (d, *J* = 7.9 Hz, 1H), 7.36-7.31 (m, 3H), 7.31-7.27 (m, 2H), 7.22 (s, 1H), 7.19 (d, *J* = 7.6 Hz, 1H), 7.14 (td, *J* = 7.9, 1.0 Hz, 1H), 6.10 (s, 1H), 5.68 (s, 1H); <sup>13</sup>C NMR (151 MHz, CDCl<sub>3</sub>) δ 162.79, 143.03, 140.26, 139.61, 136.05, 134.58, 134.44, 134.35, 133.98, 133.94, 133.65, 128.96, 127.00, 125.48, 125.36, 124.78, 124.26, 124.20, 124.00, 122.72, 122.41, 121.92, 118.59, 118.45, 113.62; IR (neat): ν<sub>max</sub> = 2970, 1739, 1366, 1229, 1217, 528 cm<sup>-1</sup>; HRMS *m/z* (EI) calc. for C<sub>25</sub>H<sub>15</sub>NOS [M<sup>+</sup>] 377.0874, found 377.0871; *R<sub>f</sub>* 0.57 (Hexane:EA, 4:1).

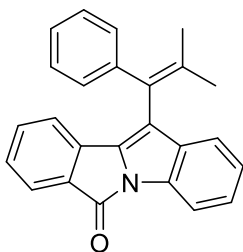

11-(2-methyl-1-phenylprop-1-en-1-yl)-6*H*-isoindolo[2,1-*a*]indol-6-one, **3ka**: yellow solid (148 mg, 85% yield); melting point 158~160 °C; <sup>1</sup>H NMR (600 MHz, CDCl<sub>3</sub>) δ 7.93 (dd, *J* = 7.8, 5.6 Hz, 1H), 7.80 (d, *J* = 7.5 Hz, 1H), 7.48 (td, *J* = 7.5, 1.1 Hz, 1H), 7.37 (t, *J* = 6.5 Hz, 2H), 7.36-7.30 (m, 4H), 7.25 (t, *J* = 8.0 Hz, 2H), 7.17 (t, *J* = 6.5 Hz, 1H), 7.07 (t, *J* = 7.6 Hz, 1H), 2.08 (s, 3H), 1.93 (s, 3H); <sup>13</sup>C NMR (151 MHz, CDCl<sub>3</sub>) δ 162.53, 140.85, 136.36, 135.15, 135.00, 134.99, 134.89, 134.13, 133.78, 133.70, 129.75, 128.48, 128.18, 126.88, 126.41, 125.28, 123.85, 122.02, 121.71, 121.07, 113.34, 23.09, 22.30; IR (neat): ν<sub>max</sub> = 2971, 1724, 1442, 1356, 744, 702 cm<sup>-1</sup>; HRMS *m/z* (EI) calc. for C<sub>25</sub>H<sub>19</sub>NO [M<sup>+</sup>] 349.1467, found 349.1469; *R<sub>f</sub>* 0.61 (Hexane:EA, 4:1).

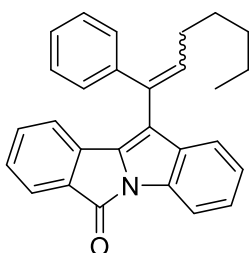

(*E,Z*)-11-(1-phenylhept-1-en-1-yl)-6*H*-isoindolo[2,1-*a*]indol-6-one, **3la**: yellow oil (182 mg, 93% yield); <sup>1</sup>H NMR (600 MHz, CDCl<sub>3</sub>) δ 8.00(*Z*) (dd, *J* = 7.6, 4.5 Hz, 1H), 7.96(*E*) (dd, *J* = 7.9, 2.5 Hz, 1H), 7.81(*Z*) (d, *J* = 7.5 Hz, 1H), 7.75(*E*) (d, *J* = 7.5 Hz, 1H), 7.52-7.46(*Z*) (m, 2H), 7.46-7.38(*E/Z*) (m, 3+3H), 7.38-7.19(*E/Z*) (m, 5+5H), 7.16(*E/Z*) (td, *J* = 7.5, 4.7 Hz, 1+1H), 7.11(*Z*) (t, *J* = 7.5 Hz, 1H), 7.07(*E*) (t, *J* = 7.6 Hz, 1H), 6.91(*E*) (d, *J* = 7.6 Hz, 1H), 6.49(*Z*) (t, *J* = 7.4 Hz, 1H), 6.35(*E*) (t, *J* = 7.5 Hz, 1H), 2.51(*E*) (dt, *J* = 7.5, 7.5 Hz, 2H), 2.32-2.19(*Z*) (m, 2H), 1.64(*E*) (tt, *J* = 7.7, 7.7 Hz, 2H), 1.55-1.48(*Z*) (m, 1H), 1.35-1.46(*E*) (m, 4H), 1.30-1.18(*Z*) (m, 4H), 0.97(*E*) (t, *J* = 7.1 Hz, 3H), 0.82(*Z*) (t, *J* = 7.0 Hz, 3H); <sup>13</sup>C NMR (151 MHz, CDCl<sub>3</sub>) (*E/Z* mixtures) δ 162.57, 162.53, 140.64, 139.22, 139.21, 135.92, 135.13, 135.10, 134.90, 134.70, 134.67, 134.65, 134.42, 134.02, 133.89, 133.73, 133.69, 133.44, 132.25, 131.33, 129.84, 128.62, 128.59, 128.52, 128.28, 127.65, 127.50, 126.72, 126.58, 126.52, 125.26, 125.11, 123.93, 123.79, 123.07, 122.16, 122.04, 122.00, 121.91, 117.71, 113.42, 113.34, 31.82, 31.45, 30.28, 29.87, 29.78, 29.27, 22.68, 22.55, 14.19, 14.04; IR (neat): ν<sub>max</sub> = 2927, 1736, 1444, 1360, 753, 700 cm<sup>-1</sup>; HRMS *m/z* (EI) calc. for C<sub>28</sub>H<sub>25</sub>NO [M<sup>+</sup>] 391.1936, found 391.1939; *R<sub>f</sub>* 0.58 (*E/Z*-overlapping, Hexane:EA, 4:1).

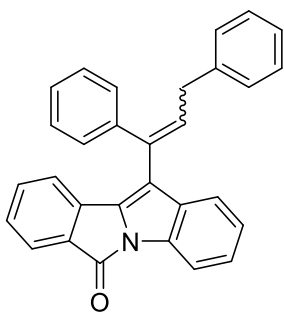

(*E/Z*)-11-(1,3-diphenylprop-1-en-1-yl)-6*H*-isoindolo[2,1-*a*]indol-6-one, **3ma**: yellow oil (181 mg, 88% yield); <sup>1</sup>H NMR (600 MHz, CDCl<sub>3</sub>) δ 8.06(*Z*) (d, *J* = 8.0 Hz, 1H), 7.98(*E*) (d, *J* = 8.0 Hz, 1H), 7.85(*Z*) (d, *J* = 8.1 Hz, 1H), 7.75(*E*) (d, *J* = 7.5 Hz, 1H), 7.56-7.51(*E/Z*) (m, 2+2H), 7.48(*E/Z*) (t, *J* = 7.5 Hz, 1+1H), 7.46-7.38(*E/Z*) (m, 2+2H), 7.34(*E/Z*) (p, *J* = 8.2, 7.3 Hz, 4+4H), 7.30-7.19(*E/Z*) (m, 4+4H), 7.16(*E/Z*) (dt, *J* = 15.2, 7.7 Hz, 1+1H), 7.04(*E/Z*) (dt, *J* = 15.0, 7.6 Hz, 1+1H), 6.73(*E*) (d, *J* = 7.6 Hz, 1H), 6.69(*Z*) (t, *J* = 7.4 Hz, 1H), 6.51(*E*) (t, *J* = 7.7 Hz, 1H), 3.87(*E*) (d, *J* = 7.7 Hz, 2H), 3.68(*Z*) (dd, *J* = 15.7, 8.1 Hz, 1H), 3.58(*Z*) (dd, *J* = 15.7, 6.7 Hz, 2H); <sup>13</sup>C NMR (151 MHz, CDCl<sub>3</sub>) (*E/Z* mixtures) δ 162.55 (2C), 140.22, 139.99, 138.62, 138.61, 136.28, 135.04, 135.00, 134.72, 134.59, 134.44, 134.03, 133.87, 133.84, 133.82, 133.70, 133.51, 133.07, 132.56, 132.20, 132.17, 129.88, 128.88, 128.76, 128.73, 128.70 (2C), 128.62, 128.57, 128.36, 128.04, 127.83, 126.88, 126.76, 126.53, 126.46, 126.29, 125.37, 125.10, 124.10, 123.83, 122.58, 122.20, 122.11, 122.02, 121.88, 117.11, 113.53, 113.34, 36.62, 36.02; IR (neat): ν<sub>max</sub> = 3030, 1717, 1442, 1360, 741, 699, 497 cm<sup>-1</sup>; HRMS *m/z* (EI) calc. for C<sub>30</sub>H<sub>21</sub>NO [M<sup>+</sup>] 411.1623, found 411.1621; *R<sub>f</sub>* 0.59 (*E/Z*-overlapping, Hexane:EA, 4:1).

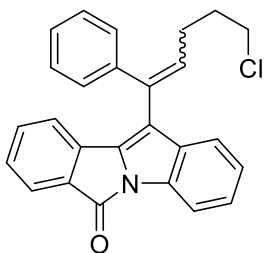

(*E/Z*)-11-(5-chloro-1-phenylpent-1-en-1-yl)-6*H*-isoindolo[2,1-*a*]indol-6-one, **3na**: yellow oil (171 mg, 86% yield); <sup>1</sup>H NMR (600 MHz, CDCl<sub>3</sub>) δ 7.97(*Z*) (d, *J* = 8.0 Hz, 1H), 7.93(*E*) (d, *J* = 8.0 Hz, 1H), 7.79(*Z*) (d, *J* = 7.5 Hz, 1H), 7.73(*E*) (d, *J* = 7.4 Hz, 1H), 7.45(*Z*) (dd, *J* = 7.2, 2.9 Hz, 2H), 7.43-7.39(*E/Z*) (m, 3+3H), 7.32-7.20(*E/Z*) (m, 4+4H), 7.17(*Z*) (d, *J* = 7.5 Hz, 1H), 7.14(*E*) (d, *J* = 7.9 Hz, 1H), 7.12-7.08(*Z*) (m, 2H), 7.06(*E*) (t, *J* = 7.6 Hz, 1H), 6.83(*E*) (d, *J* = 7.6 Hz, 1H), 6.43(*Z*) (td, *J* = 7.7, 2.2 Hz, 1H), 6.27(*E*) (t, *J* = 7.5 Hz, 1H), 3.63(*E*) (t, *J* = 6.6 Hz, 2H), 3.52-3.42(*Z*) (m, 2H), 2.65(*E*) (q, *J* = 7.6 Hz, 2H), 2.45-2.32(*Z*) (m, 2H), 2.08(*E*) (dt, *J* = 14.1, 6.6 Hz, 2H), 1.94(*Z*) (p, *J* = 7.2 Hz, 2H); <sup>13</sup>C NMR (151 MHz, CDCl<sub>3</sub>) (*E/Z* mixtures) δ 162.59, 162.57, 140.25, 138.87, 136.07, 134.93, 134.89, 134.82, 134.60, 134.52, 134.14, 134.05, 133.90, 133.77, 133.72, 133.61, 133.29, 132.90, 132.63, 131.89, 129.78, 128.81, 128.74, 128.73, 128.49, 128.00, 127.86, 126.79, 126.75, 126.67, 125.43, 125.24, 124.09, 123.92, 122.64, 122.04, 122.03, 121.90, 121.77, 117.16, 113.53, 113.43, 44.59, 44.32, 33.04, 32.54, 27.77, 27.25; IR (neat): ν<sub>max</sub> = 3031, 1736, 1442, 1360, 753, 700, 497 cm<sup>-1</sup>; HRMS *m/z* (EI) calc. for C<sub>26</sub>H<sub>20</sub>ClNO [M<sup>+</sup>] 397.1233, found 397.1236; *R<sub>f</sub>* 0.49 (*E/Z*-overlapping, Hexane:EA, 4:1).

## Synthesis of **B**; alkenyl reduction of **3aa**

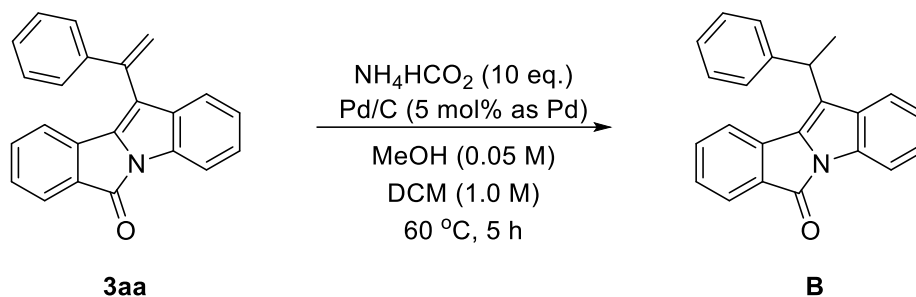

In an oven-dried 100 ml schlenk flask, **3aa** (0.481 g, 1.5 mmol), ammonium formate (15 mmol, 0.945 g), and Pd/C (0.16 g, 5 mol% as Pd) were added, and the reaction flask was evacuated and backfilled with nitrogen for 3 times. Then, dichloromethane (1.0 M, 1.5 mL) was added and stirred until **3aa** completely dissolved. 30 mL of methanol (0.05 M) was added and the mixture was allowed to warm up to 60 °C for 5 hours. The reaction progress was monitored by gas chromatography. After completion, the mixture was filtered through plug of celite and the filtrate was concentrated in vacuo to give a crude residue that was purified by silica gel column chromatography to give **B** in 97% yield.

**B**: yellow solid (485 mg, 97% yield); <sup>1</sup>H NMR (600 MHz, CDCl<sub>3</sub>) 7.92 (d, *J* = 8.0 Hz, 1H), 7.76 (d, *J* = 7.6 Hz, 1H), 7.44 (d, *J* = 8.1 Hz, 2H), 7.40 (t, *J* = 7.7 Hz, 1H), 7.33 (dd, *J* = 7.7 Hz, 2H), 7.29 (dd, *J* = 8.1 Hz, 2H), 7.27-7.22 (m, 2H), 7.19 (d, *J* = 7.6 Hz, 1H), 7.07 (t, *J* = 7.6 Hz, 1H), 4.70 (q, *J* = 7.3 Hz, 1H), 1.86 (d, *J* = 7.3 Hz, 3H); <sup>13</sup>C NMR (151 MHz, CDCl<sub>3</sub>) δ 162.61, 143.46, 135.04, 134.46, 134.28, 134.08, 133.72, 128.84, 128.44, 127.54, 126.80, 126.67, 125.49, 125.01, 123.77, 122.20, 121.83, 113.67, 35.66, 19.94; *R<sub>f</sub>* 0.65 (Hexane:EA, 4:1)



## Applications

### *E/Z* isomerization of **4**<sup>S8</sup>

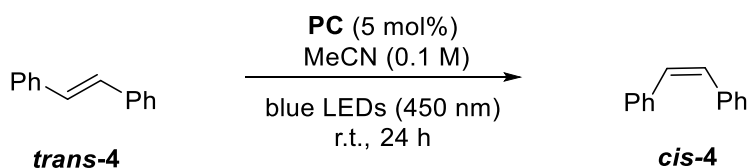

An oven-dried resealable test tube equipped with a magnetic stir bar was charged with **trans-4** (0.5 mmol), appropriate photocatalyst (5 mol%) and degassed MeCN (0.1 M, 5.0 mL) under argon. The reaction test tube was placed under blue LEDs (450 nm, 18 W, Hepatochem) at room temperature. The reaction was stirred for 24 h, and the ratio of **4** was checked by gas chromatography.

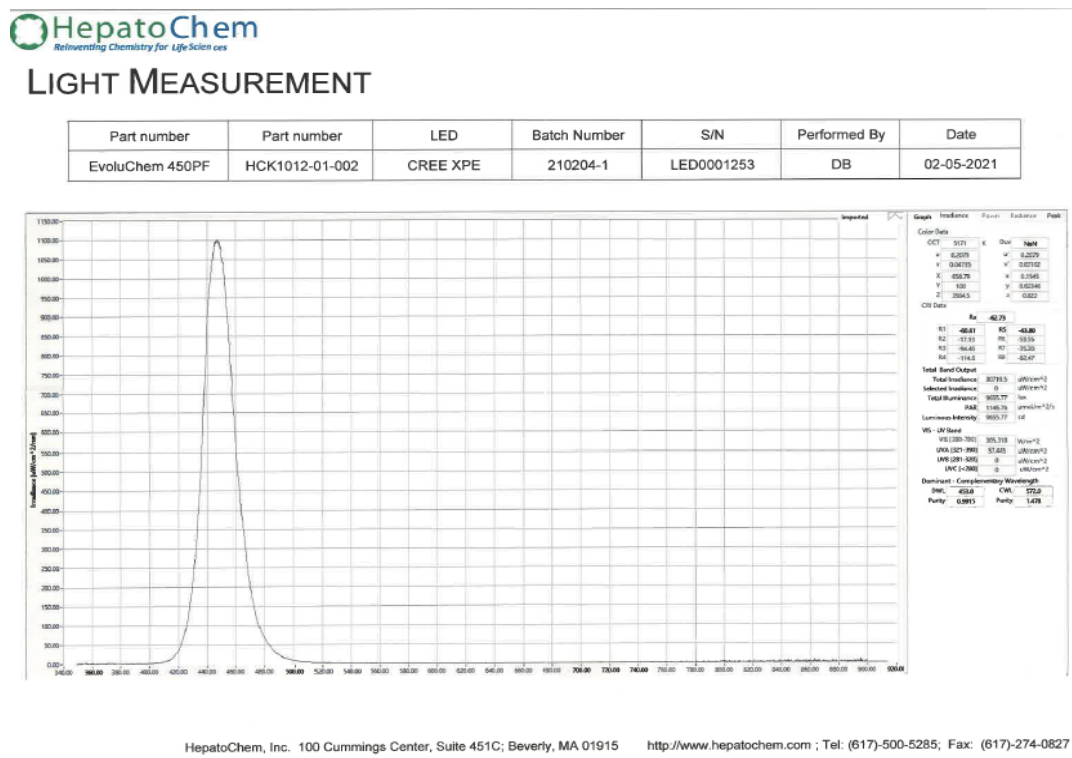

EvoluChem LED light spectrum (Sourced by [www.hepatochem.com](http://www.hepatochem.com))

### Aerobic oxidation of **3aa**

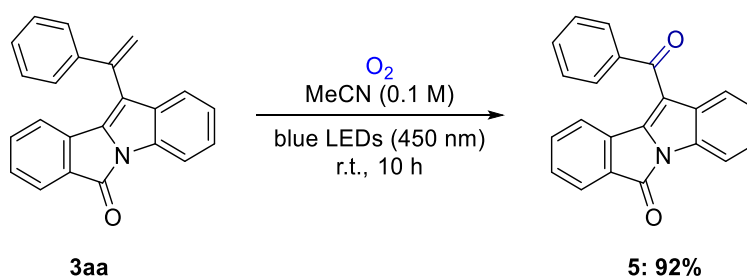

An oven-dried resealable test tube equipped with a magnetic stir bar was charged with **3aa** (0.5 mmol) and MeCN (0.1 M, 5.0 mL). Molecular oxygen was then bubbled through the reaction mixture, and the tube was sealed with a silicone septa screw-cap. A balloon filled with oxygen was attached to the tube by needle, and the reaction tube was placed under blue LEDs (450 nm, 18 W, Hepatochem) at room temperature. The reaction was allowed to proceed for 12 h, and reaction progress was checked by gas chromatography. The solvent was removed under vacuum, and the corresponding oxidized product was purified by flash silica gel chromatography to give **5** in 92% yield.

**5**: orange solid (148 mg, 92% yield); melting point 161~163 °C;  $^1\text{H NMR}$  (600 MHz,  $\text{CDCl}_3$ )  $\delta$  7.96 (d,  $J$  = 8.0 Hz, 1H), 7.93 (d,  $J$  = 7.4 Hz, 2H), 7.76 (dd,  $J$  = 5.1, 3.4 Hz, 1H), 7.66 (t,  $J$  = 7.4 Hz, 1H), 7.52 (t,  $J$  = 7.7 Hz, 2H), 7.40 (d,  $J$  = 8.0 Hz, 1H), 7.38-7.31 (m, 3H), 7.17-7.10 (m, 2H);  $^{13}\text{C NMR}$  (151 MHz,  $\text{CDCl}_3$ )  $\delta$  191.68, 163.04, 142.42, 139.36, 134.46, 133.90, 133.72, 133.35, 133.11, 132.46, 130.37, 129.54, 128.98, 127.17, 125.58, 124.91, 124.74, 123.16, 117.04, 113.45; **IR** (neat):  $\nu_{\text{max}}$  = 3023, 1737, 1444, 1360, 1043, 727, 698  $\text{cm}^{-1}$ ;  $R_f$  0.51 (Hexane:EA, 4:1)

### Aerobic oxidation of **6** and **8**<sup>S9</sup>

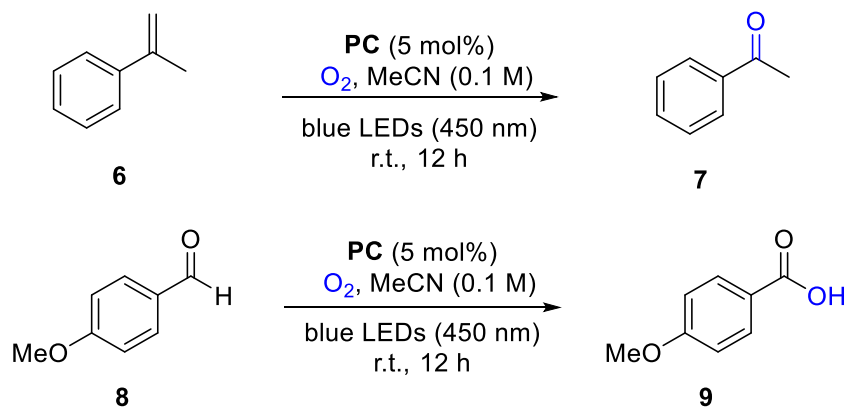

An oven-dried resealable test tube equipped with a magnetic stir bar was charged with appropriate substrate (0.5 mmol), photocatalyst (5 mol%), and MeCN (0.1 M, 5.0 mL). Molecular oxygen was then bubbled through the reaction mixture, and the tube was sealed with a silicone septa screw-cap. A balloon filled with oxygen was attached to the tube by needle, and the reaction tube was placed under blue LEDs (450 nm, 18 W, Hepatochem) at room temperature. The reaction was allowed to proceed for 12 h, and reaction progress was checked

by gas chromatography. The solvent was removed under vacuum, and the corresponding oxidized product was purified by flash silica gel chromatography.

### Trifluoromethylation of **10** and **12**<sup>S10</sup>

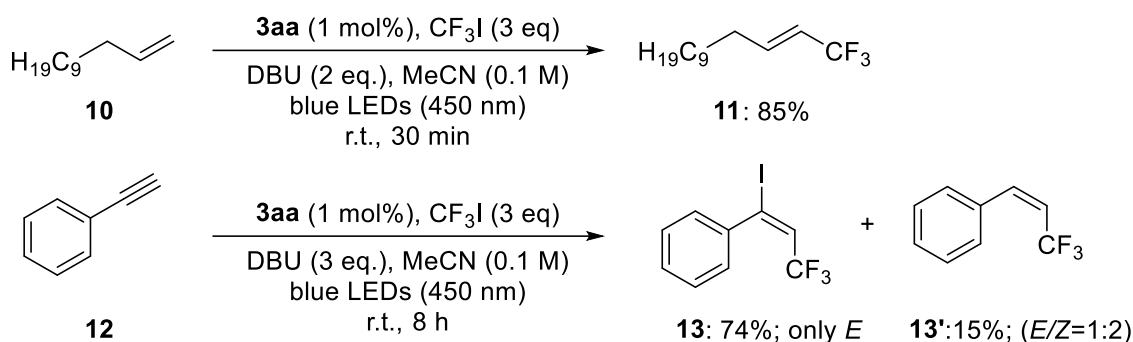

An oven-dried resealable test tube equipped with a magnetic stir bar was charged with the substrate (**10** or **12**, 0.50 mmol) and sealed with a silicone septa screw-cap. A solution of **3aa** (1.0 mol %) in MeCN (5.0 mL, 0.1 M) and DBU (1.0 mmol) were then added to the tube under argon. CF<sub>3</sub>I (1.5 mmol) was then delivered into the reaction mixture using a gastight syringe. The test tube was placed and stirred under blue LEDs (450 nm, 18 W, Hepatochem) at room temperature (30 min for **10**; 8 h for **12**), and the progress of the reaction was monitored by gas chromatography. The reaction mixture was diluted in diethyl ether and washed with water and brine. The organic layers were dried over MgSO<sub>4</sub>, concentrated in vacuo, and purified by flash column chromatography on silica gel to give **11** or **13/13'**.

**11**: colorless oil; <sup>1</sup>H NMR (600 MHz, CDCl<sub>3</sub>) δ 6.37 (dtq, *J* = 16.0, 6.8, 2.4 Hz, 1H), 5.60 (dqt, *J* = 16.0, 6.4, 1.6 Hz, 2H), 2.19-2.09 (m, 2H), 1.48-1.38 (m, 2H), 1.36-1.20 (m, 14H), 0.88 (t, *J* = 6.8 Hz, 3H); <sup>13</sup>C NMR (151 MHz, CDCl<sub>3</sub>) δ 141.06 (q, *J* = 6.6 Hz), 123.38 (q, *J* = 270.1 Hz), 118.49 (q, *J* = 33.2 Hz), 32.15, 31.70, 29.83, 29.77, 29.61, 29.57, 29.28, 28.19, 22.93, 14.33; *R*<sub>f</sub> 0.51 (hexane).

**13**: colorless oil; <sup>1</sup>H NMR (600 MHz, CDCl<sub>3</sub>) δ 7.40-7.30 (m, 5H), 6.64 (q, *J* = 7.6 Hz, 1H); <sup>13</sup>C NMR (151 MHz, CDCl<sub>3</sub>) δ 140.91, 129.78 (q, *J* = 34.8 Hz), 129.70, 128.37, 127.44, 121.49 (q, *J* = 274.9 Hz), 111.37 (q, *J* = 6.4 Hz); <sup>19</sup>F NMR (564 MHz, CDCl<sub>3</sub>) δ -57.67 *R*<sub>f</sub> 0.71 (hexane).

**13'** (*E/Z* = 1:2): colorless oil; <sup>1</sup>H NMR (600 MHz, CDCl<sub>3</sub>) δ (*E*)- : 7.49-7.34 (m, 5H), 7.17 (d, *J* = 16.2, 1H), 6.22 (dq, *J* = 16.2, 6.4 Hz, 1H) (*Z*)- : 7.49-7.34 (m, 5H), 6.94 (d, *J* = 12.8 Hz, 1H), 5.78 (dq, *J* = 12.8, 9.2 Hz, 1H); <sup>13</sup>C NMR (151 MHz, CDCl<sub>3</sub>) δ (*E*)139.89 (q, *J* = 5.9 Hz), (*Z*)137.88 (q, *J* = 6.9 Hz), (*E*)133.642, (*Z*)132.354, 130.23, 129.15, 128.54, (*Z*)123.85 (q, *J* = 270.0 Hz), (*E*)123.02 (q, *J* = 272.3 Hz), (*E*)118.24 (q, *J* = 34.8 Hz), (*Z*)116.10 (q, *J* = 33.9 Hz); <sup>19</sup>F NMR (564 MHz, CDCl<sub>3</sub>) δ (*E*)- : -57.55, (*Z*)- : -63.34; IR (neat): ν<sub>max</sub> = 2922, 2851, 1648, 1459 cm<sup>-1</sup>; *R*<sub>f</sub> 0.60 (hexane).

### Trifluoromethylation of **14**<sup>S11</sup>

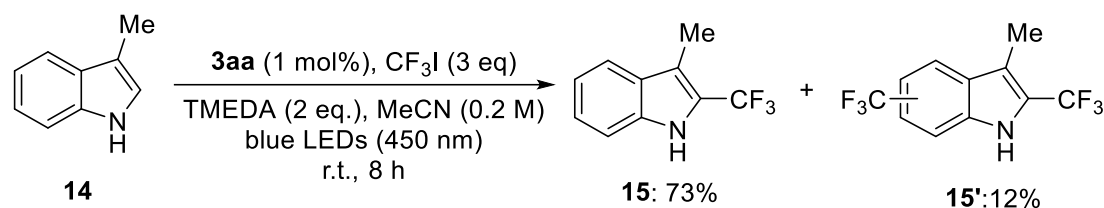

A flame-dried tube equipped with a magnetic stirring bar was charged with argon. The substrate **14** (0.5 mmol), **3aa** (1 mol %), TMEDA (1.0 mmol), and MeCN (2.5 mL, 0.2 M) were added to the tube. CF<sub>3</sub>I (1.5 mmol, 37.5 mL) was then delivered into the reaction mixture using a gastight syringe. The reaction tube was placed and stirred under blue LEDs (450 nm, 18 W, Hepatochem) at room temperature for 8 h. The reaction progress was monitored by gas chromatography. After 8 h, the mixture was diluted with diethyl ether and washed with brine. The layers were separated, and the organic layer was concentrated in vacuo to give a crude residue that was purified by silica gel column chromatography to give **15** and **15'**.

**15**: white solid; <sup>1</sup>H NMR (600 MHz, CDCl<sub>3</sub>) δ 8.18 (s, 1H), 7.65 (d, *J* = 8.1 Hz, 1H), 7.39 (d, *J* = 8.2 Hz, 1H), 7.33 (dd, *J* = 8.1, 7.8 Hz, 1H), 7.20 (dd, *J* = 8.2, 7.8 Hz, 1H), 2.45 (q, *J* = 1.8 Hz, 3H); <sup>13</sup>C NMR (151 MHz, CDCl<sub>3</sub>) δ 135.4, 128.3, 124.9, 122.3 (q, *J* = 269.6 Hz), 121.7 (q, *J* = 36.8 Hz), 120.6, 120.3, 114.3 (q, *J* = 3.0 Hz), 111.8, 8.5; <sup>19</sup>F NMR (564 MHz, CDCl<sub>3</sub>) δ -58.69; *R*<sub>f</sub> 0.71 (Hexane:EA, 10:1).

### C-C coupling reaction of **16** and **17**<sup>S12</sup>

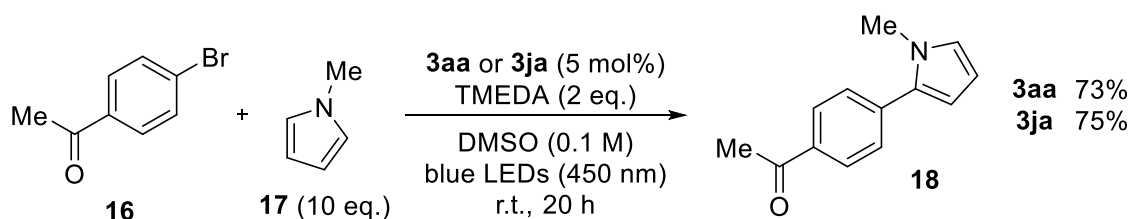

An oven-dried reaction flask equipped with a magnetic stir bar was charged with **16** (0.5 mmol), **17** (5 mmol), 1 mmol of TMEDA, and 5 mol% of **3aa** or **3ja** in degassed DMSO (0.1 M, 5 mL). Then, argon was bubbled through the reaction mixture for 2 min, and the reaction mixture tube was placed and stirred under blue LEDs (450 nm, 18 W, Hepatochem) at room temperature. The reaction progress was monitored by gas chromatography. After 20 h, the mixture was diluted with methylene chloride and washed with brine. The layers were separated, and the organic layer was dried with MgSO<sub>4</sub>, filtered, and concentrated in vacuo to give a crude residue

that was purified by silica gel column chromatography to give the corresponding C-C coupled **18**.

**18**: pale-green oil; **1H NMR** (600 MHz, CDCl<sub>3</sub>)  $\delta$  7.99 (d,  $J$  = 8.5 Hz, 2H), 7.50 (d,  $J$  = 8.5 Hz, 2H), 6.77 (dd,  $J$  = 2.6, 1.9 Hz, 1H), 6.35 (dd,  $J$  = 3.6, 1.9 Hz, 1H), 6.23 (dd,  $J$  = 3.6, 2.6 Hz, 1H), 3.72 (s, 3H), 2.62 (s, 3H); **13C NMR** (151 MHz, CDCl<sub>3</sub>)  $\delta$  197.77, 138.14, 135.18, 133.64, 128.80, 128.18, 125.52, 110.45, 108.58, 35.66, 26.79;  $R_f$  0.37 (Hexane:EA, 4:1).

### C-B coupling reaction of **16** and **19**<sup>S12</sup>

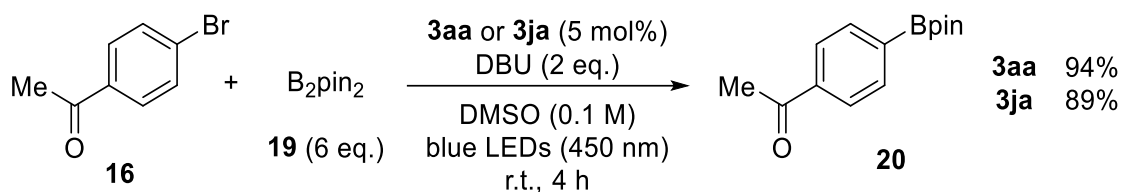

An oven-dried reaction flask equipped with a magnetic stir bar was charged with **16** (0.5 mmol), bis(pinacolato)diboron (**19**, 3 mmol), 1 mmol of DBU, and 5 mol% of **3aa** or **3ja** in degassed DMSO (0.1 M, 5 mL). Then, argon was bubbled through the reaction mixture for 2 min, and the reaction mixture tube was placed and stirred under blue LEDs (450 nm, 18 W, Hepatochem) at room temperature. The reaction progress was monitored by gas chromatography. Upon completion of the reaction, the mixture was diluted with methylene chloride and washed with brine. The layers were separated, and the organic layer was dried with MgSO<sub>4</sub>, filtered, and concentrated in vacuo to give a crude residue that was purified by silica gel column chromatography to give the corresponding C-B coupled product, **20**.

**20**: pale-green solid; **1H NMR** (600 MHz, CDCl<sub>3</sub>)  $\delta$  7.93 (d,  $J$  = 8.3 Hz, 2H), 7.89 (d,  $J$  = 8.3 Hz, 2H), 2.61 (s, 3H), 1.35 (s, 12H); **13C NMR** (151 MHz, CDCl<sub>3</sub>)  $\delta$  198.72, 139.21, 135.13, 127.50, 110.15, 84.44, 29.92, 25.09;  $R_f$  0.55 (Hexane:EA, 9:1).

## Crystal Structure Data

Formula weight: 321.36; Crystal system: Monoclinic; Space group: P2(1)/m; Unit cell dimensions:  $a = 5.6444(4) \text{ \AA}$ ,  $b = 15.047(10) \text{ \AA}$ ,  $c = 9.888(7) \text{ \AA}$ ,  $\alpha = 90.00^\circ$ ,  $\beta = 105.229(9)^\circ$ ,  $\gamma = 90.00^\circ$ ; Cell volume =  $810.3(16) \text{ \AA}^3$ ,  $Z = 2$ ; Density calculated =  $1.337 \text{ g/cm}^3$ ;  $R_{\text{All}} = 0.154$ . Detailed X-ray crystallographic data is available from the Cambridge Crystallographic Data Centre, 12 Union Road, Cambridge CB2 1EZ, UK (CCDC 2054405).

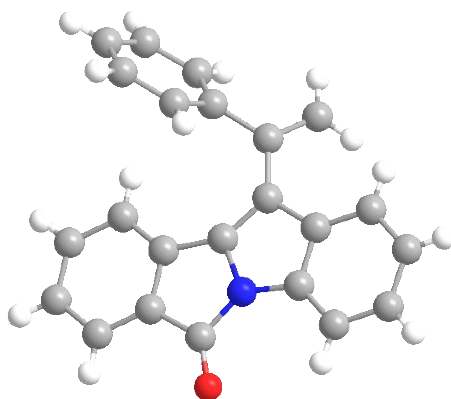

**X-Ray Structure of 3aa**

```
data_11-(1-phenylvinyl)-6H-isoindolo[2,1-a]indol-6-one_0m
_contact_author_name 'Dr Eun Jin Cho'
_publ_contact_author_address;department of chemistry
Chung-Ang University84 Heukseok-ro, Heukseok-dong, Dongjak-gu, Seoul;
_publ_contact_author_email ejcho@cau.ac.kr
_publ_contact_author_phone 82-2-820-5946
loop_
_publ_author_name
_publ_author_address
'Dr Eun Jin Cho';
department of chemistryChung-Ang University, 84 Heukseok-ro, Heukseok-dong, Dongjak-gu, Seoul;
'Dr Naem Iqbal';
department of chemistryChung-Ang University, 84 Heukseok-ro, Heukseok-dong, Dongjak-gu, Seoul

_audit_creation_method 'SHELXL-2017/1'
_shelx_SHELXL_version_number '2017/1'
_chemical_name_systematic ?
_chemical_name_common ?
_chemical_melting_point ?
_chemical_formula_moiety ?
_chemical_formula_sum
'C23 H15 N O'
_chemical_formula_weight 321.36

loop_
_atom_type_symbol
_atom_type_description
_atom_type_scatter_dispersion_real
_atom_type_scatter_dispersion_imag
_atom_type_scatter_source
'C' 'C' 0.0033 0.0016
```

'International Tables Vol C Tables 4.2.6.8 and 6.1.1.4'  
'H' 'H' 0.0000 0.0000  
'International Tables Vol C Tables 4.2.6.8 and 6.1.1.4'  
'N' 'N' 0.0061 0.0033  
'International Tables Vol C Tables 4.2.6.8 and 6.1.1.4'  
'O' 'O' 0.0106 0.0060  
'International Tables Vol C Tables 4.2.6.8 and 6.1.1.4'

```
_space_group_crystal_system      monoclinic
_space_group_IT_number            4
_space_group_name_H-M_alt        'P 21'
_space_group_name_Hall            'P 2yb'
```

```
_shelx_space_group_comment
```

```
;
```

The symmetry employed for this shelxl refinement is uniquely defined by the following loop, which should always be used as a source of symmetry information in preference to the above space-group names. They are only intended as comments.

```
;
```

```
loop_
```

```
_space_group_symop_operation_xyz
```

```
'x, y, z'
```

```
'-x, y+1/2, -z'
```

```
_cell_length_a                    5.60(2)
_cell_length_b                    14.98(5)
_cell_length_c                    9.85(4)
_cell_angle_alpha                 90
_cell_angle_beta                  105.15(4)
_cell_angle_gamma                 90
_cell_volume                      798(5)
_cell_formula_units_Z             2
_cell_measurement_temperature     273(2)
_cell_measurement_reflns_used     ?
_cell_measurement_theta_min       ?
_cell_measurement_theta_max       ?
```

```
_exptl_crystal_description        ?
_exptl_crystal_colour             ?
_exptl_crystal_density_meas       ?
_exptl_crystal_density_method     ?
_exptl_crystal_density_diffn      1.338
_exptl_crystal_F_000              336
_exptl_transmission_factor_min     ?
_exptl_transmission_factor_max     ?
_exptl_crystal_size_max           ?
_exptl_crystal_size_mid           ?
_exptl_crystal_size_min           ?
_exptl_absorpt_coefficient_mu      0.082
_shelx_estimated_absorpt_T_min     ?
_shelx_estimated_absorpt_T_max     ?
_exptl_absorpt_correction_type     ?
_exptl_absorpt_correction_T_min    ?
_exptl_absorpt_correction_T_max    ?
_exptl_absorpt_process_details     ?
_exptl_absorpt_special_details     ?
_diffn_ambient_temperature         273(2)
```

```

_diffrn_radiation_wavelength      0.71073
_diffrn_radiation_type            MoK\alpha
_diffrn_source                    ?
_diffrn_measurement_device_type   ?
_diffrn_measurement_method        ?
_diffrn_detector_area_resol_mean  ?
_diffrn_reflns_number             3464
_diffrn_reflns_av_unetl/netl      0.1107
_diffrn_reflns_av_R_equivalents   0.0487
_diffrn_reflns_limit_h_min        -7
_diffrn_reflns_limit_h_max        7
_diffrn_reflns_limit_k_min        -16
_diffrn_reflns_limit_k_max        19
_diffrn_reflns_limit_l_min        -12
_diffrn_reflns_limit_l_max        13
_diffrn_reflns_theta_min          4.611
_diffrn_reflns_theta_max          28.398
_diffrn_reflns_theta_full         25.242
_diffrn_measured_fraction_theta_max 0.891
_diffrn_measured_fraction_theta_full 0.940
_diffrn_reflns_Laue_measured_fraction_max 0.891
_diffrn_reflns_Laue_measured_fraction_full 0.940
_diffrn_reflns_point_group_measured_fraction_max 0.710
_diffrn_reflns_point_group_measured_fraction_full 0.779
_reflns_number_total              2845
_reflns_number_gt                 1399
_reflns_threshold_expression       'I > 2\sigma(I)'
_reflns_Friedel_coverage           0.536
_reflns_Friedel_fraction_max      0.515
_reflns_Friedel_fraction_full     0.605

```

\_reflns\_special\_details

;

Reflections were merged by SHELXL according to the crystal class for the calculation of statistics and refinement.

\_reflns\_Friedel\_fraction is defined as the number of unique Friedel pairs measured divided by the number that would be possible theoretically, ignoring centric projections and systematic absences.

;

```

_computing_data_collection        ?
_computing_cell_refinement        ?
_computing_data_reduction         ?
_computing_structure_solution     'SHELXT 2014/5 (Sheldrick, 2014)'
_computing_structure_refinement 'SHELXL-2017/1 (Sheldrick, 2017)'
_computing_molecular_graphics     ?
_computing_publication_material   ?
_refine_special_details           ?
_refine_ls_structure_factor_coef  Fsqd
_refine_ls_matrix_type            full
_refine_ls_weighting_scheme       calc
_refine_ls_weighting_details      'w=1/[\sigma^2(Fo^2)+(0.1023P)^2+1.1479P] where P=(Fo^2+2Fc^2)/3'
_atom_sites_solution_primary      ?
_atom_sites_solution_secondary    ?
_atom_sites_solution_hydrogens    geom
_refine_ls_hydrogen_treatment     constr

```



```

_refine_ls_extinction_method      none
_refine_ls_extinction_coef        .
_refine_ls_abs_structure_details
;
  Flack x determined using 455 quotients [(I+)-(I-)]/[(I+)+(I-)]
  (Parsons, Flack and Wagner, Acta Cryst. B69 (2013) 249-259).
;
_refine_ls_abs_structure_Flack    -1.8(10)
_chemical_absolute_configuration  ?
_refine_ls_number_reflns          2845
_refine_ls_number_parameters      226
_refine_ls_number_restraints      1
_refine_ls_R_factor_all           0.1539
_refine_ls_R_factor_gt            0.0707
_refine_ls_wR_factor_ref          0.2623
_refine_ls_wR_factor_gt          0.2264
_refine_ls_goodness_of_fit_ref    0.993
_refine_ls_restrained_S_all       0.993
_refine_ls_shift/su_max           0.000
_refine_ls_shift/su_mean          0.000

```

```

loop_
  _atom_site_label
  _atom_site_type_symbol
  _atom_site_fract_x
  _atom_site_fract_y
  _atom_site_fract_z
  _atom_site_U_iso_or_equiv
  _atom_site_adp_type
  _atom_site_occupancy
  _atom_site_site_symmetry_order
  _atom_site_calc_flag
  _atom_site_refinement_flags_posn
  _atom_site_refinement_flags_adp
  _atom_site_refinement_flags_occupancy
  _atom_site_disorder_assembly
  _atom_site_disorder_group
O001 O 0.8999(14) 0.4210(5) 0.7782(7) 0.076(2) Uani 1 1 d . . . . .
N002 N 0.8027(14) 0.4302(5) 0.5359(8) 0.0491(19) Uani 1 1 d . . . . .
C00A C 0.1365(17) 0.5558(7) 0.0547(9) 0.055(3) Uani 1 1 d . . . . .
H00A H 0.052376 0.504115 0.017535 0.066 Uiso 1 1 calc R U . . .
C00B C 0.3811(16) 0.5505(7) 0.1314(8) 0.048(2) Uani 1 1 d . . . . .
C00C C 0.6264(16) 0.4704(7) 0.4258(9) 0.049(2) Uani 1 1 d . . . . .
C00D C 0.155(2) 0.6130(8) 0.5407(12) 0.067(3) Uani 1 1 d . . . . .
H00D H 0.015534 0.648250 0.507875 0.080 Uiso 1 1 calc R U . . .
C00E C 0.5014(17) 0.6285(7) 0.1828(9) 0.054(2) Uani 1 1 d . . . . .
H00E H 0.666149 0.626914 0.234167 0.065 Uiso 1 1 calc R U . . .
C00F C 0.454(2) 0.5503(8) 0.7338(10) 0.066(3) Uani 1 1 d . . . . .
H00F H 0.518300 0.541975 0.829999 0.079 Uiso 1 1 calc R U . . .
C00G C 0.0161(19) 0.6370(9) 0.0329(10) 0.067(3) Uani 1 1 d . . . . .
H00G H -0.148547 0.639450 -0.018580 0.080 Uiso 1 1 calc R U . . .
C00H C 0.5067(16) 0.4627(7) 0.1592(9) 0.051(2) Uani 1 1 d . . . . .
C00I C 1.0103(18) 0.3402(8) 0.2557(12) 0.064(3) Uani 1 1 d . . . . .
H00I H 0.962433 0.343262 0.158043 0.076 Uiso 1 1 calc R U . . .
C00J C 0.378(2) 0.7093(8) 0.1581(11) 0.069(3) Uani 1 1 d . . . . .
H00J H 0.462023 0.761657 0.191748 0.083 Uiso 1 1 calc R U . . .
C00K C 1.163(2) 0.3294(7) 0.5489(13) 0.067(3) Uani 1 1 d . . . . .
H00K H 1.213697 0.326820 0.646602 0.080 Uiso 1 1 calc R U . . .
C00L C 1.289(2) 0.2853(8) 0.4693(15) 0.077(3) Uani 1 1 d . . . . .

```

H00L H 1.426105 0.250852 0.512650 0.093 Uiso 1 1 calc R U ...  
 C00M C 1.216(2) 0.2911(8) 0.3238(15) 0.076(3) Uani 1 1 d .....  
 H00M H 1.306837 0.261468 0.271011 0.092 Uiso 1 1 calc R U ...  
 C00N C 0.471(2) 0.4007(8) 0.0581(10) 0.072(3) Uani 1 1 d .....  
 H00B H 0.544424 0.344895 0.077277 0.086 Uiso 1 1 calc R U ...  
 H00C H 0.371659 0.413424 -0.031370 0.086 Uiso 1 1 calc R U ...  
 C00O C 0.136(2) 0.7137(7) 0.0857(10) 0.067(3) Uani 1 1 d .....  
 H00O H 0.052896 0.768095 0.072400 0.080 Uiso 1 1 calc R U ...  
 C00P C 0.249(2) 0.6029(8) 0.6828(12) 0.074(4) Uani 1 1 d .....  
 H00P H 0.173709 0.631456 0.744624 0.089 Uiso 1 1 calc R U ...  
 C003 C 0.7742(19) 0.4502(7) 0.6690(10) 0.056(3) Uani 1 1 d .....  
 C004 C 0.2617(17) 0.5727(6) 0.4438(10) 0.052(2) Uani 1 1 d .....  
 H004 H 0.194107 0.580037 0.347629 0.063 Uiso 1 1 calc R U ...  
 C005 C 0.8761(17) 0.3847(6) 0.3351(10) 0.051(2) Uani 1 1 d .....  
 C006 C 0.6625(15) 0.4429(6) 0.3002(9) 0.047(2) Uani 1 1 d .....  
 C007 C 0.4698(16) 0.5217(6) 0.4943(9) 0.045(2) Uani 1 1 d .....  
 C008 C 0.9600(18) 0.3779(7) 0.4812(10) 0.053(2) Uani 1 1 d .....  
 C009 C 0.5619(19) 0.5107(6) 0.6394(9) 0.052(2) Uani 1 1 d .....

loop\_

\_atom\_site\_aniso\_label  
 \_atom\_site\_aniso\_U\_11  
 \_atom\_site\_aniso\_U\_22  
 \_atom\_site\_aniso\_U\_33  
 \_atom\_site\_aniso\_U\_23  
 \_atom\_site\_aniso\_U\_13  
 \_atom\_site\_aniso\_U\_12  
 O001 0.097(5) 0.075(6) 0.042(4) 0.008(4) -0.005(4) -0.008(4)  
 N002 0.056(4) 0.042(5) 0.047(4) 0.005(4) 0.008(3) -0.005(4)  
 C00A 0.061(6) 0.059(7) 0.043(5) -0.006(5) 0.010(4) -0.009(5)  
 C00B 0.054(5) 0.057(7) 0.032(5) 0.006(4) 0.010(4) -0.002(5)  
 C00C 0.051(5) 0.052(6) 0.042(5) 0.004(4) 0.010(4) -0.011(5)  
 C00D 0.070(7) 0.056(8) 0.085(8) -0.004(6) 0.039(6) 0.002(5)  
 C00E 0.060(6) 0.057(7) 0.044(5) 0.001(5) 0.009(4) -0.014(6)  
 C00F 0.091(8) 0.069(8) 0.045(6) -0.010(5) 0.029(6) -0.025(7)  
 C00G 0.065(6) 0.077(8) 0.052(6) 0.002(6) 0.005(5) 0.006(7)  
 C00H 0.058(5) 0.063(7) 0.035(5) 0.004(5) 0.016(4) -0.005(5)  
 C00I 0.061(6) 0.052(7) 0.086(8) -0.002(6) 0.034(6) -0.004(5)  
 C00J 0.090(8) 0.052(8) 0.057(6) 0.005(5) 0.007(6) -0.015(6)  
 C00K 0.055(6) 0.052(7) 0.086(7) 0.012(6) 0.004(6) -0.003(5)  
 C00L 0.054(7) 0.057(8) 0.117(11) 0.016(7) 0.017(7) 0.010(6)  
 C00M 0.065(7) 0.054(8) 0.122(11) 0.002(7) 0.047(7) 0.005(6)  
 C00N 0.095(8) 0.080(9) 0.040(5) -0.004(5) 0.018(5) 0.000(6)  
 C00O 0.087(8) 0.054(8) 0.054(6) 0.005(5) 0.009(5) 0.005(6)  
 C00P 0.102(9) 0.069(9) 0.067(8) -0.021(6) 0.048(7) -0.012(7)  
 C003 0.080(7) 0.045(7) 0.039(5) -0.003(4) 0.006(5) -0.030(6)  
 C004 0.059(6) 0.047(7) 0.056(6) 0.000(5) 0.025(5) -0.002(5)  
 C005 0.055(6) 0.041(6) 0.062(6) 0.005(5) 0.022(5) -0.004(5)  
 C006 0.051(5) 0.051(7) 0.042(5) -0.001(4) 0.015(4) -0.007(4)  
 C007 0.052(5) 0.047(6) 0.037(5) -0.003(4) 0.014(4) -0.010(5)  
 C008 0.051(6) 0.044(6) 0.060(6) 0.008(5) 0.010(5) -0.004(5)  
 C009 0.065(6) 0.047(6) 0.044(6) 0.000(4) 0.014(5) -0.009(5)

\_geom\_special\_details

;

All esds (except the esd in the dihedral angle between two l.s. planes)  
 are estimated using the full covariance matrix. The cell esds are taken  
 into account individually in the estimation of esds in distances, angles  
 and torsion angles; correlations between esds in cell parameters are only

used when they are defined by crystal symmetry. An approximate (isotropic) treatment of cell esds is used for estimating esds involving l.s. planes.

```
;  
loop_  
  _geom_bond_atom_site_label_1  
  _geom_bond_atom_site_label_2  
  _geom_bond_distance  
  _geom_bond_site_symmetry_2  
  _geom_bond_publ_flag  
O001 C003 1.203(11) . ?  
N002 C008 1.389(13) . ?  
N002 C003 1.394(13) . ?  
N002 C00C 1.398(11) . ?  
C00A C00G 1.381(15) . ?  
C00A C00B 1.383(12) . ?  
C00A H00A 0.9300 . ?  
C00B C00E 1.378(13) . ?  
C00B C00H 1.483(14) . ?  
C00C C006 1.369(13) . ?  
C00C C007 1.457(13) . ?  
C00D C00P 1.368(15) . ?  
C00D C004 1.389(13) . ?  
C00D H00D 0.9300 . ?  
C00E C00J 1.384(15) . ?  
C00E H00E 0.9300 . ?  
C00F C009 1.369(14) . ?  
C00F C00P 1.377(17) . ?  
C00F H00F 0.9300 . ?  
C00G C00O 1.362(15) . ?  
C00G H00G 0.9300 . ?  
C00H C00N 1.338(13) . ?  
C00H C006 1.465(13) . ?  
C00I C00M 1.383(16) . ?  
C00I C005 1.389(14) . ?  
C00I H00I 0.9300 . ?  
C00J C00O 1.359(15) . ?  
C00J H00J 0.9300 . ?  
C00K C00L 1.356(17) . ?  
C00K C008 1.368(14) . ?  
C00K H00K 0.9300 . ?  
C00L C00M 1.387(19) . ?  
C00L H00L 0.9300 . ?  
C00M H00M 0.9300 . ?  
C00N H00B 0.9300 . ?  
C00N H00C 0.9300 . ?  
C00O H00O 0.9300 . ?  
C00P H00P 0.9300 . ?  
C003 C009 1.462(15) . ?  
C004 C007 1.374(13) . ?  
C004 H004 0.9300 . ?  
C005 C008 1.396(14) . ?  
C005 C006 1.448(13) . ?  
C007 C009 1.398(14) . ?  
  
loop_  
  _geom_angle_atom_site_label_1  
  _geom_angle_atom_site_label_2  
  _geom_angle_atom_site_label_3  
  _geom_angle
```

\_geom\_angle\_site\_symmetry\_1  
\_geom\_angle\_site\_symmetry\_3  
\_geom\_angle\_publ\_flag  
C008 N002 C003 136.6(8) .. ?  
C008 N002 C00C 109.5(8) .. ?  
C003 N002 C00C 113.9(8) .. ?  
C00G C00A C00B 120.6(9) .. ?  
C00G C00A H00A 119.7 .. ?  
C00B C00A H00A 119.7 .. ?  
C00E C00B C00A 118.1(9) .. ?  
C00E C00B C00H 121.5(9) .. ?  
C00A C00B C00H 120.4(8) .. ?  
C006 C00C N002 109.3(8) .. ?  
C006 C00C C007 145.7(9) .. ?  
N002 C00C C007 104.9(7) .. ?  
C00P C00D C004 122.5(11) .. ?  
C00P C00D H00D 118.7 .. ?  
C004 C00D H00D 118.7 .. ?  
C00B C00E C00J 120.2(9) .. ?  
C00B C00E H00E 119.9 .. ?  
C00J C00E H00E 119.9 .. ?  
C009 C00F C00P 118.4(10) .. ?  
C009 C00F H00F 120.8 .. ?  
C00P C00F H00F 120.8 .. ?  
C00O C00G C00A 120.8(10) .. ?  
C00O C00G H00G 119.6 .. ?  
C00A C00G H00G 119.6 .. ?  
C00N C00H C006 120.1(10) .. ?  
C00N C00H C00B 120.4(9) .. ?  
C006 C00H C00B 119.4(8) .. ?  
C00M C00I C005 119.1(11) .. ?  
C00M C00I H00I 120.4 .. ?  
C005 C00I H00I 120.4 .. ?  
C00O C00J C00E 121.2(10) .. ?  
C00O C00J H00J 119.4 .. ?  
C00E C00J H00J 119.4 .. ?  
C00L C00K C008 118.0(11) .. ?  
C00L C00K H00K 121.0 .. ?  
C008 C00K H00K 121.0 .. ?  
C00K C00L C00M 120.6(11) .. ?  
C00K C00L H00L 119.7 .. ?  
C00M C00L H00L 119.7 .. ?  
C00I C00M C00L 121.2(11) .. ?  
C00I C00M H00M 119.4 .. ?  
C00L C00M H00M 119.4 .. ?  
C00H C00N H00B 120.0 .. ?  
C00H C00N H00C 120.0 .. ?  
H00B C00N H00C 120.0 .. ?  
C00J C00O C00G 118.9(11) .. ?  
C00J C00O H00O 120.5 .. ?  
C00G C00O H00O 120.5 .. ?  
C00D C00P C00F 119.8(10) .. ?  
C00D C00P H00P 120.1 .. ?  
C00F C00P H00P 120.1 .. ?  
O001 C003 N002 125.3(11) .. ?  
O001 C003 C009 131.2(9) .. ?  
N002 C003 C009 103.5(8) .. ?  
C007 C004 C00D 117.9(10) .. ?  
C007 C004 H004 121.0 .. ?

C00D C004 H004 121.0 . . ?  
 C00I C005 C008 117.4(9) . . ?  
 C00I C005 C006 133.7(9) . . ?  
 C008 C005 C006 108.9(8) . . ?  
 C00C C006 C005 105.9(8) . . ?  
 C00C C006 C00H 127.2(9) . . ?  
 C005 C006 C00H 126.8(8) . . ?  
 C004 C007 C009 119.2(9) . . ?  
 C004 C007 C00C 133.0(9) . . ?  
 C009 C007 C00C 107.7(8) . . ?  
 C00K C008 N002 129.9(10) . . ?  
 C00K C008 C005 123.7(10) . . ?  
 N002 C008 C005 106.4(8) . . ?  
 C00F C009 C007 122.2(10) . . ?  
 C00F C009 C003 127.8(9) . . ?  
 C007 C009 C003 109.9(8) . . ?

\_refine\_diff\_density\_max 0.150  
 \_refine\_diff\_density\_min -0.179  
 \_refine\_diff\_density\_rms 0.039

\_shelx\_res\_file

;

TITL Integration of BJH

200331BJHF\_0m.res

created by SHELXL-2017/1 at 11:58:13 on 01-Apr-2020

CELL 0.71073 5.6019 14.9798 9.8511 90.000 105.147 90.000

ZERR 2.000 0.0198 0.0521 0.0366 0.000 0.039 0.000

LATT -1

SYMM -X, 1/2+Y, -Z

SFAC C H N O

UNIT 46 30 2 2

L.S. 10

ACTA

BOND \$H

FMAP 2

PLAN 20

TEMP 0.000

WGHT 0.102300 1.147900

FVAR 1.13008

O001 4 0.899924 0.421046 0.778190 11.00000 0.09730 0.07467 =  
 0.04238 0.00815 -0.00482 -0.00761

N002 3 0.802745 0.430216 0.535946 11.00000 0.05598 0.04158 =  
 0.04672 0.00476 0.00810 -0.00500

C00A 1 0.136525 0.555769 0.054727 11.00000 0.06067 0.05944 =  
 0.04261 -0.00575 0.01017 -0.00913

AFIX 43

H00A 2 0.052376 0.504115 0.017535 11.00000 -1.20000

AFIX 0

C00B 1 0.381132 0.550483 0.131448 11.00000 0.05401 0.05688 =  
 0.03183 0.00637 0.00971 -0.00184

C00C 1 0.626359 0.470411 0.425832 11.00000 0.05087 0.05182 =  
 0.04175 0.00437 0.01005 -0.01129

C00D 1 0.155467 0.613038 0.540738 11.00000 0.07025 0.05637 =  
 0.08456 -0.00409 0.03934 0.00189

AFIX 43

H00D 2 0.015534 0.648250 0.507875 11.00000 -1.20000

AFIX 0

C00E 1 0.501356 0.628534 0.182769 11.00000 0.05996 0.05679 =

|      |    |           |          |           |          |          |           |
|------|----|-----------|----------|-----------|----------|----------|-----------|
|      |    | 0.04398   | 0.00061  | 0.00874   | -0.01447 |          |           |
| AFIX | 43 |           |          |           |          |          |           |
| H00E | 2  | 0.666149  | 0.626914 | 0.234167  | 11.00000 | -1.20000 |           |
| AFIX | 0  |           |          |           |          |          |           |
| C00F | 1  | 0.454242  | 0.550336 | 0.733795  | 11.00000 | 0.09076  | 0.06904 = |
|      |    | 0.04461   | -0.01012 | 0.02937   | -0.02505 |          |           |
| AFIX | 43 |           |          |           |          |          |           |
| H00F | 2  | 0.518300  | 0.541975 | 0.829999  | 11.00000 | -1.20000 |           |
| AFIX | 0  |           |          |           |          |          |           |
| C00G | 1  | 0.016143  | 0.637029 | 0.032853  | 11.00000 | 0.06545  | 0.07736 = |
|      |    | 0.05212   | 0.00163  | 0.00545   | 0.00591  |          |           |
| AFIX | 43 |           |          |           |          |          |           |
| H00G | 2  | -0.148547 | 0.639450 | -0.018580 | 11.00000 | -1.20000 |           |
| AFIX | 0  |           |          |           |          |          |           |
| C00H | 1  | 0.506740  | 0.462712 | 0.159200  | 11.00000 | 0.05827  | 0.06267 = |
|      |    | 0.03467   | 0.00429  | 0.01611   | -0.00516 |          |           |
| C00I | 1  | 1.010274  | 0.340151 | 0.255708  | 11.00000 | 0.06090  | 0.05217 = |
|      |    | 0.08574   | -0.00166 | 0.03376   | -0.00439 |          |           |
| AFIX | 43 |           |          |           |          |          |           |
| H00I | 2  | 0.962433  | 0.343262 | 0.158043  | 11.00000 | -1.20000 |           |
| AFIX | 0  |           |          |           |          |          |           |
| C00J | 1  | 0.377795  | 0.709339 | 0.158119  | 11.00000 | 0.09024  | 0.05250 = |
|      |    | 0.05704   | 0.00469  | 0.00740   | -0.01545 |          |           |
| AFIX | 43 |           |          |           |          |          |           |
| H00J | 2  | 0.462023  | 0.761657 | 0.191748  | 11.00000 | -1.20000 |           |
| AFIX | 0  |           |          |           |          |          |           |
| C00K | 1  | 1.163375  | 0.329416 | 0.548937  | 11.00000 | 0.05472  | 0.05230 = |
|      |    | 0.08620   | 0.01192  | 0.00438   | -0.00289 |          |           |
| AFIX | 43 |           |          |           |          |          |           |
| H00K | 2  | 1.213697  | 0.326820 | 0.646602  | 11.00000 | -1.20000 |           |
| AFIX | 0  |           |          |           |          |          |           |
| C00L | 1  | 1.289320  | 0.285305 | 0.469294  | 11.00000 | 0.05400  | 0.05674 = |
|      |    | 0.11727   | 0.01641  | 0.01651   | 0.00991  |          |           |
| AFIX | 43 |           |          |           |          |          |           |
| H00L | 2  | 1.426105  | 0.250852 | 0.512650  | 11.00000 | -1.20000 |           |
| AFIX | 0  |           |          |           |          |          |           |
| C00M | 1  | 1.215999  | 0.291107 | 0.323808  | 11.00000 | 0.06550  | 0.05369 = |
|      |    | 0.12243   | 0.00234  | 0.04715   | 0.00451  |          |           |
| AFIX | 43 |           |          |           |          |          |           |
| H00M | 2  | 1.306837  | 0.261468 | 0.271011  | 11.00000 | -1.20000 |           |
| AFIX | 0  |           |          |           |          |          |           |
| C00N | 1  | 0.470601  | 0.400707 | 0.058091  | 11.00000 | 0.09548  | 0.08021 = |
|      |    | 0.03964   | -0.00417 | 0.01826   | 0.00017  |          |           |
| AFIX | 93 |           |          |           |          |          |           |
| H00B | 2  | 0.544424  | 0.344895 | 0.077277  | 11.00000 | -1.20000 |           |
| H00C | 2  | 0.371659  | 0.413424 | -0.031370 | 11.00000 | -1.20000 |           |
| AFIX | 0  |           |          |           |          |          |           |
| C00O | 1  | 0.135641  | 0.713672 | 0.085678  | 11.00000 | 0.08697  | 0.05409 = |
|      |    | 0.05380   | 0.00484  | 0.00857   | 0.00518  |          |           |
| AFIX | 43 |           |          |           |          |          |           |
| H00O | 2  | 0.052896  | 0.768095 | 0.072400  | 11.00000 | -1.20000 |           |
| AFIX | 0  |           |          |           |          |          |           |
| C00P | 1  | 0.248787  | 0.602918 | 0.682766  | 11.00000 | 0.10167  | 0.06934 = |
|      |    | 0.06701   | -0.02057 | 0.04818   | -0.01225 |          |           |
| AFIX | 43 |           |          |           |          |          |           |
| H00P | 2  | 0.173709  | 0.631456 | 0.744624  | 11.00000 | -1.20000 |           |
| AFIX | 0  |           |          |           |          |          |           |
| C003 | 1  | 0.774151  | 0.450206 | 0.669013  | 11.00000 | 0.07976  | 0.04530 = |
|      |    | 0.03867   | -0.00296 | 0.00633   | -0.03024 |          |           |

```

C004 1 0.261734 0.572732 0.443766 11.00000 0.05937 0.04725 =
      0.05575 0.00002 0.02457 -0.00246
AFIX 43
H004 2 0.194107 0.580037 0.347629 11.00000 -1.20000
AFIX 0
C005 1 0.876117 0.384686 0.335140 11.00000 0.05535 0.04109 =
      0.06173 0.00519 0.02209 -0.00446
C006 1 0.662452 0.442876 0.300175 11.00000 0.05095 0.05106 =
      0.04175 -0.00147 0.01466 -0.00732
C007 1 0.469827 0.521742 0.494258 11.00000 0.05167 0.04703 =
      0.03685 -0.00254 0.01428 -0.00950
C008 1 0.959999 0.377859 0.481215 11.00000 0.05105 0.04387 =
      0.06012 0.00842 0.00967 -0.00398
C009 1 0.561936 0.510656 0.639430 11.00000 0.06493 0.04699 =
      0.04394 -0.00041 0.01401 -0.00863
HKLF 4

```

REM Integration of BJH

REM R1 = 0.0707 for 1399 Fo > 4sig(Fo) and 0.1539 for all 2845 data

REM 226 parameters refined using 1 restraints

END

WGHT 0.0368 0.2920

REM Highest difference peak 0.150, deepest hole -0.179, 1-sigma level 0.039

```

Q1 1 0.5132 0.4608 0.3179 11.00000 0.05 0.15
Q2 1 1.0040 0.3970 0.4170 11.00000 0.05 0.15
Q3 1 1.0764 0.3193 0.7626 11.00000 0.05 0.14
Q4 1 0.6624 0.7509 0.0836 11.00000 0.05 0.14
Q5 1 1.0908 0.2508 0.6610 11.00000 0.05 0.14
Q6 1 0.0463 0.4574 0.0580 11.00000 0.05 0.14
Q7 1 1.0461 0.3884 0.7630 11.00000 0.05 0.13
Q8 1 1.0876 0.3196 0.6952 11.00000 0.05 0.13
Q9 1 0.0614 0.6304 0.1372 11.00000 0.05 0.13
Q10 1 0.2004 0.5761 0.1638 11.00000 0.05 0.13
Q11 1 0.4554 0.7892 0.2588 11.00000 0.05 0.13
Q12 1 0.6944 0.3964 0.5875 11.00000 0.05 0.12
Q13 1 0.9469 0.6066 0.1991 11.00000 0.05 0.12
Q14 1 -0.0284 0.5955 0.6848 11.00000 0.05 0.12
Q15 1 0.4052 0.4330 0.4065 11.00000 0.05 0.12
Q16 1 0.3446 0.5726 0.2080 11.00000 0.05 0.12
Q17 1 0.9002 0.4347 0.6356 11.00000 0.05 0.12
Q18 1 0.2969 0.5402 0.0239 11.00000 0.05 0.12
Q19 1 0.2740 0.5799 0.5889 11.00000 0.05 0.12
Q20 1 0.2696 0.5038 0.1560 11.00000 0.05 0.11

```

;

\_shelx\_res\_checksum 22497

\_shelx\_hkl\_file

;

## References

- Ref S1. Y. Moglie, M. J. González-Soria, I. Martín-García, G. Radivoy and F. Alonso, *Green Chemistry* 2016, **18**, 4896-4907.
- Ref S2. M. J. Frisch, G. W. Trucks, H. B. Schlegel, G. E. Scuseria, M. A. Robb, J. R. Cheeseman, G. Scalmani, V. Barone, B. Mennucci, G. A. Petersson, H. Nakatsuji, M. Caricato, X. Li, H. P. Hratchian, A. F. Izmaylov, J. Bloino, G. Zheng, J. L. Sonnenberg, M. Hada, M. Ehara, K. Toyota, R. Fukuda, J. Hasegawa, M. Ishida, T. Nakajima, Y. Honda, O. Kitao, H. Nakai, T. Vreven, Montgomery, J. A. Jr., J. E. Peralta, F. Ogliaro, M. Bearpark, J. J. Heyd, E. Brothers, K. N. Kudin, V. N. Staroverov, R. Kobayashi, J. Normand, K. Raghavachari, A. Rendell, J. C. Burant, S. S. Iyengar, J. Tomasi, M. Cossi, N. Rega, J. M. Millam, M. Klene, J. E. Knox, J. B. Cross, V. Bakken, C. Adamo, J. Jaramillo, R. Gomperts, R. E. Stratmann, O. Yazyev, A. J. Austin, R. Cammi, C. Pomelli, J. W. Ochterski, R. L. Martin, K. Morokuma, V. G. Zakrzewski, G. A. Voth, P. Salvador, J. J. Dannenberg, S. Dapprich, A. D. Daniels, Ö. Farkas, J. B. Foresman, J. V. Ortiz, J. Cioslowski and D. J. Fox, Gaussian 09, Revision D01; Gaussian, Inc., Wallingford, CT, 2009.
- Ref S3. T. Yanai, D. P. Tew and N. C. Handy, *Chem. Phys. Lett.*, 2004, **393**, 51-57.
- Ref S4. G. Scalmani and M. J. Frisch, *J. Chem. Phys.*, 2010, **132**, 114110.
- Ref S5. CYLview, 1.0b; C. Y. Legault, Université de Sherbrooke, 2009 <http://www.cylview.org>
- Ref S6. J. Q. Umberger and V. K. LaMer, *J. Am. Chem. Soc.*, 1945, **67**, 7, 1099-1109.
- Ref S7. D. Y. Jeong and Y. You, *Synlett*, 2021, **32**, DOI: 10.1055/a-1608-5633.
- Ref S8. J. Lu, B. Pattengale, Q. Liu, S. Yang, W. Shi, S. Li, J. Huang and J. Zhang, *J. Am. Chem. Soc.*, 2018, **140**, 42, 13719-13725.
- Ref S9. N. Iqbal, S. Choi, Y. You, and E. J. Cho, *Tetrahedron. Lett.*, 2013, **13**, 6222-6225.
- Ref S10. N. Iqbal, J. Jung, S. Park and E. J. Cho, *Angew. Chem. Int. Ed.* 2014, **53**, 539-542.
- Ref S11. N. Iqbal, S. Choi, E. Ko and E. J. Cho, *Tetrahedron Lett.* 2012, **53**, 2005-2008.
- Ref S12. D. S. Lee, C. S. Kim, N. Iqbal, G. S. Park, K. Son and E. J. Cho, *Org. Lett.* 2019, **21**, 9950-9953.



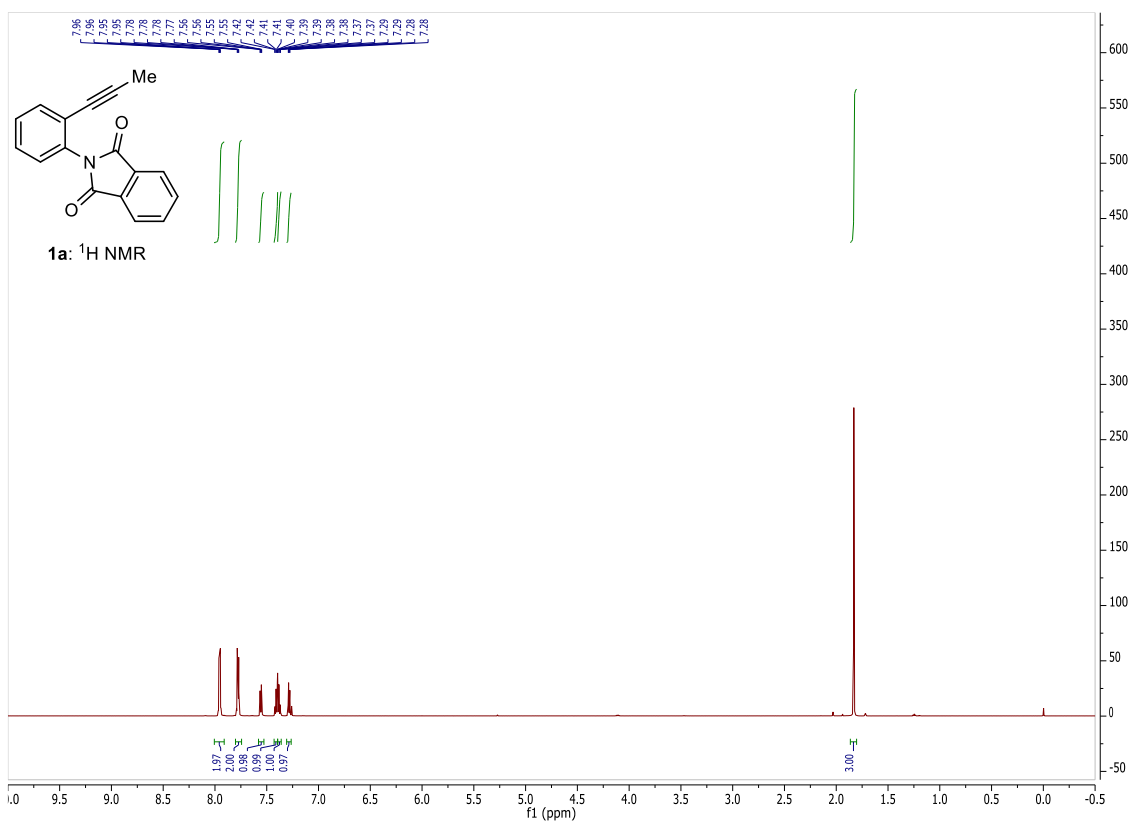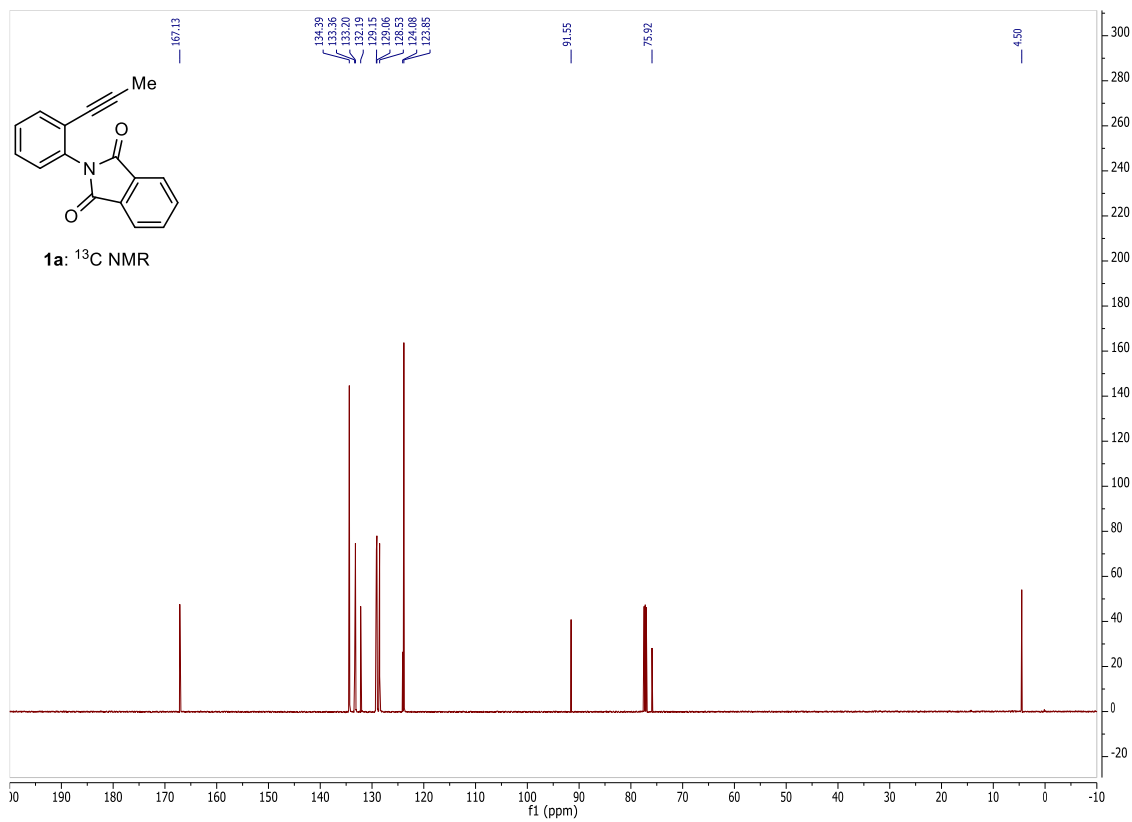

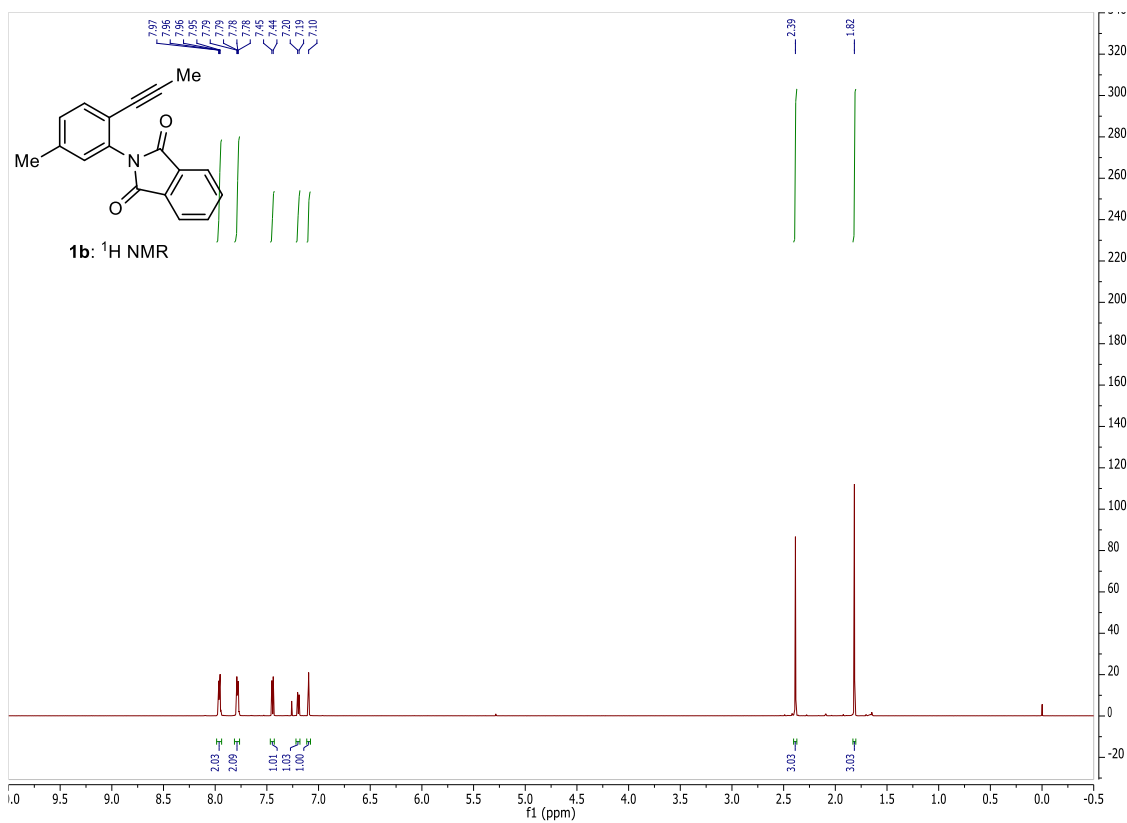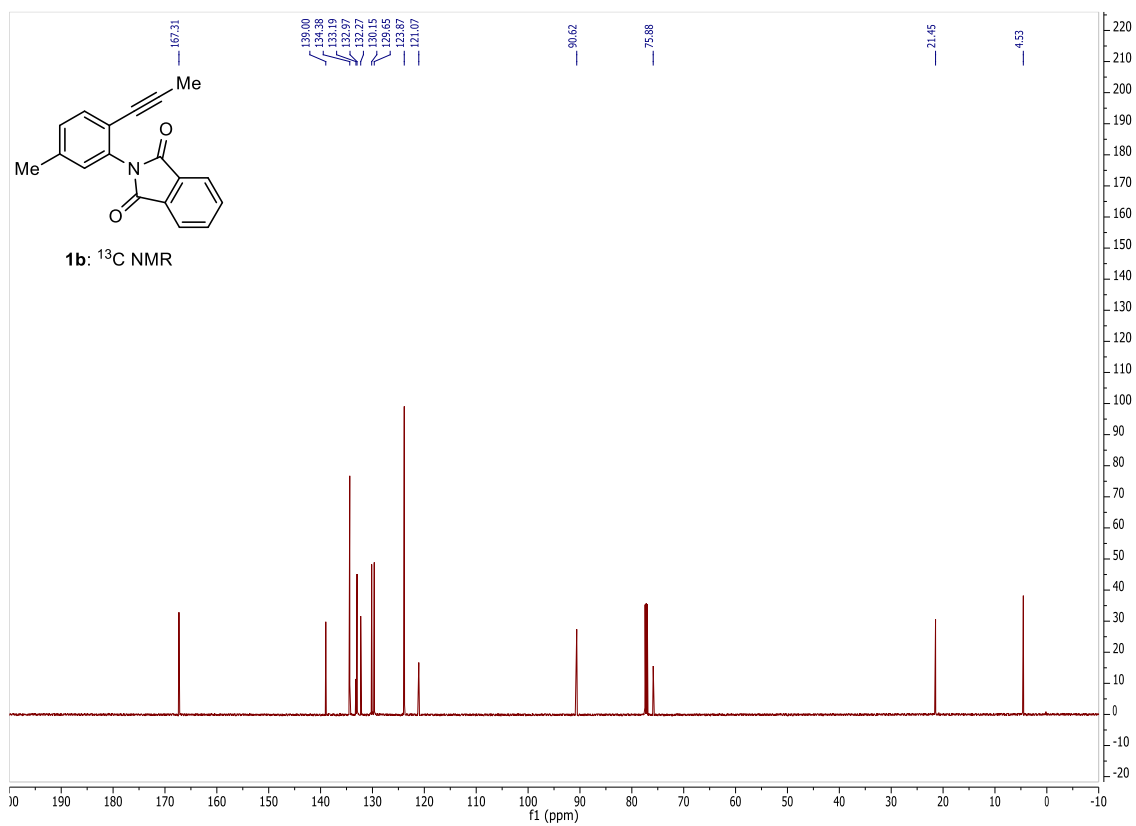

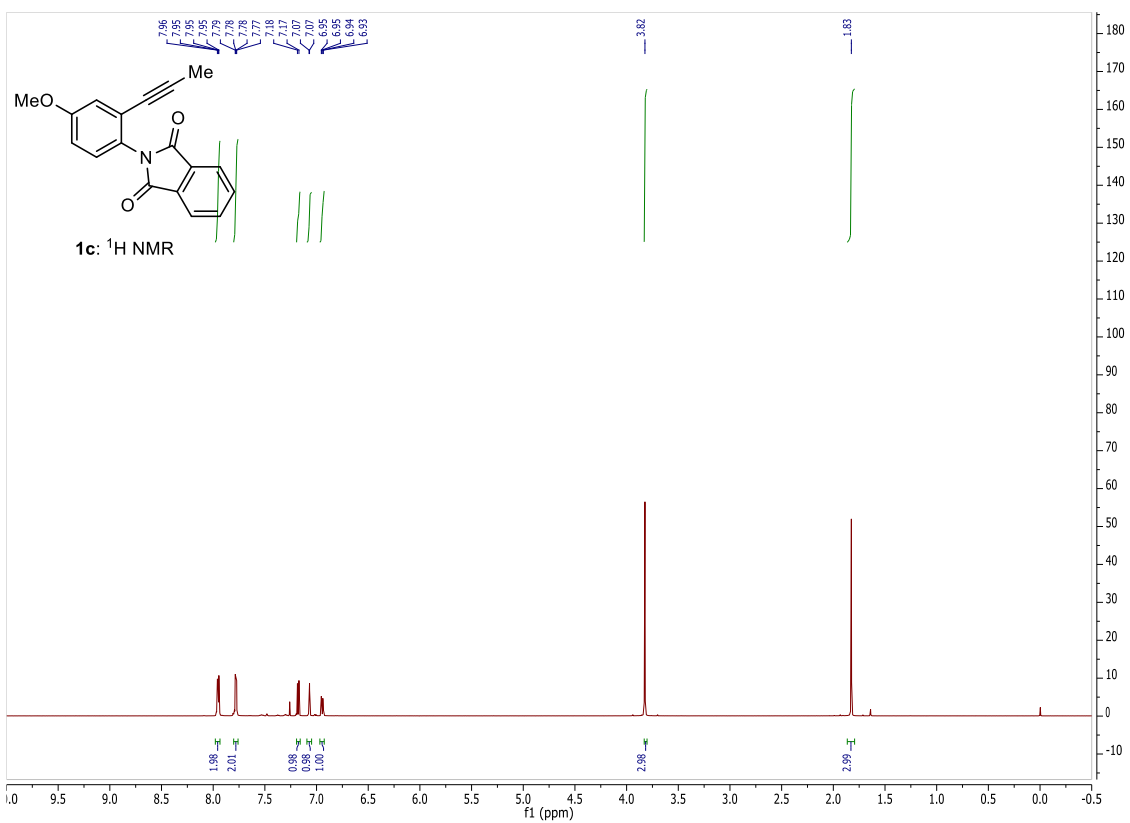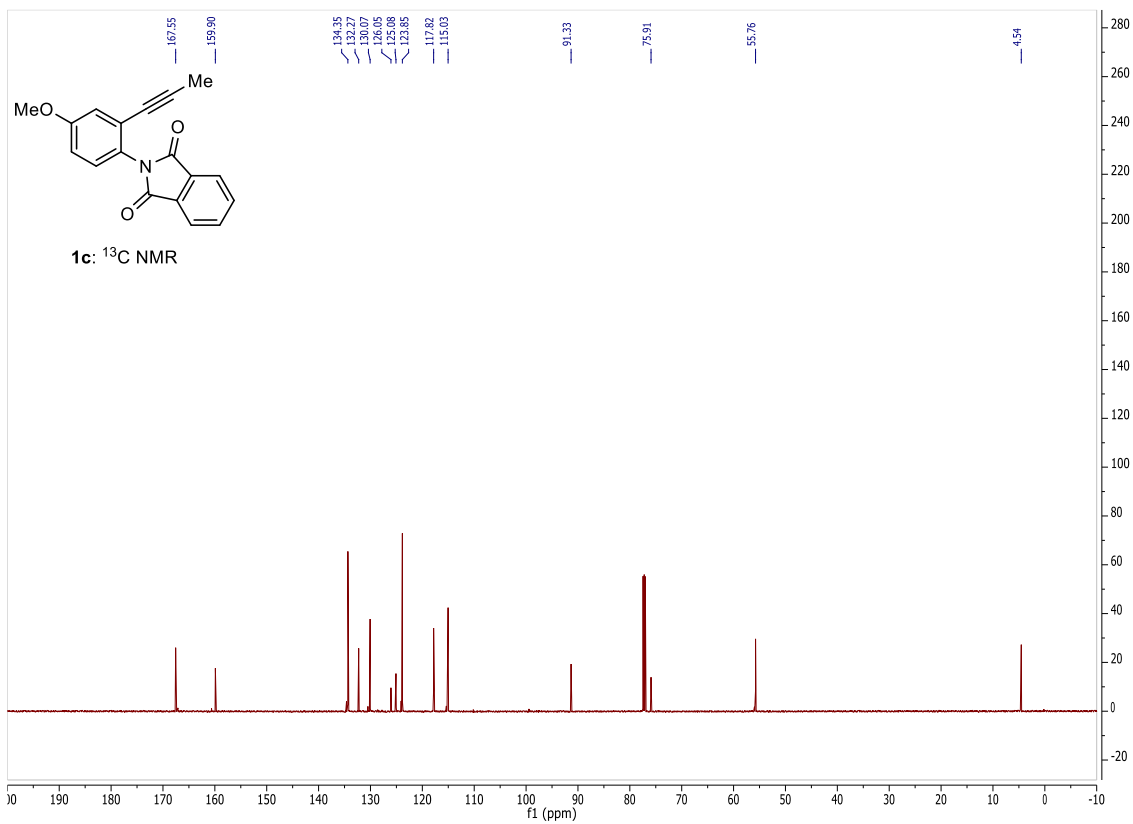

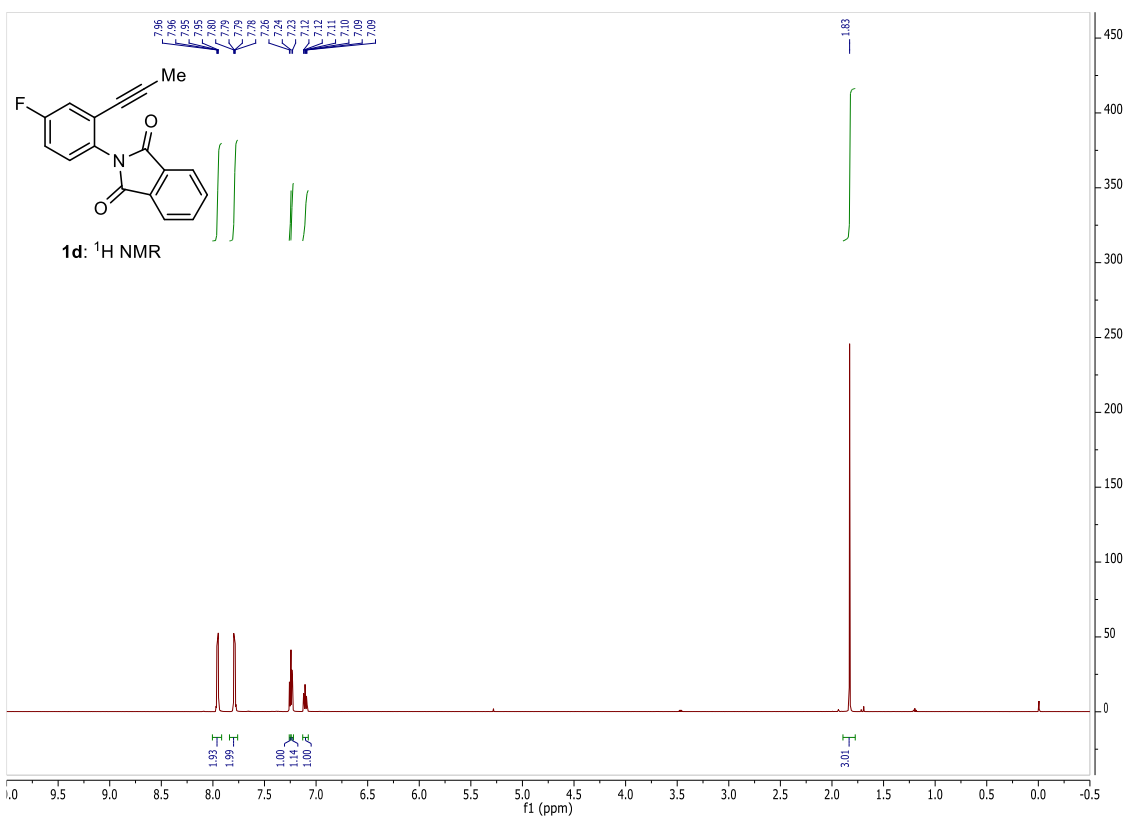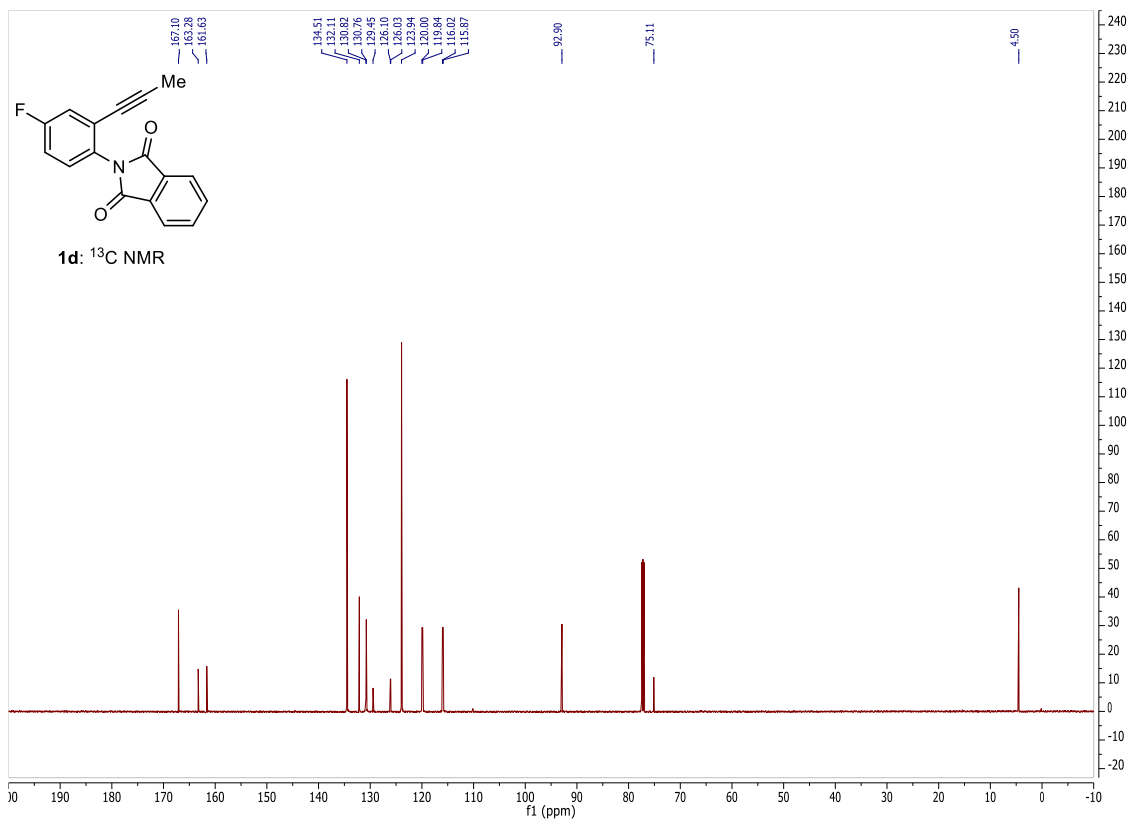

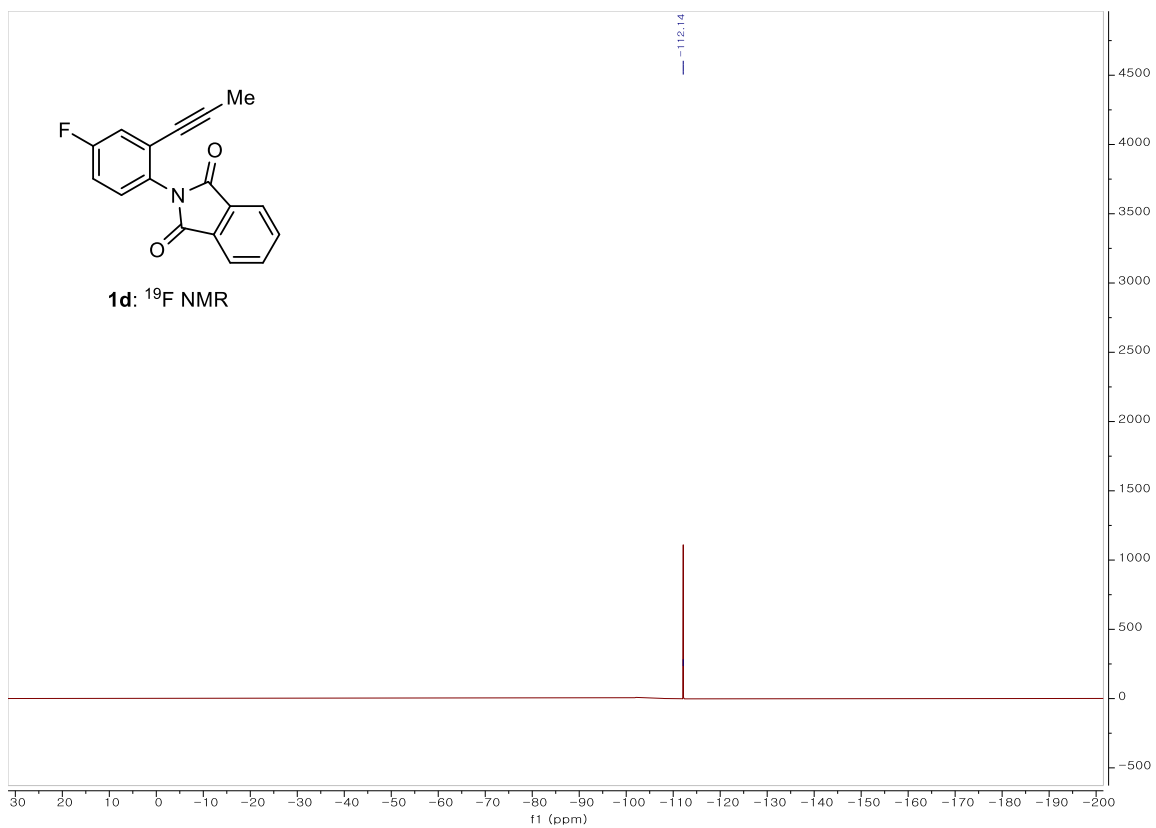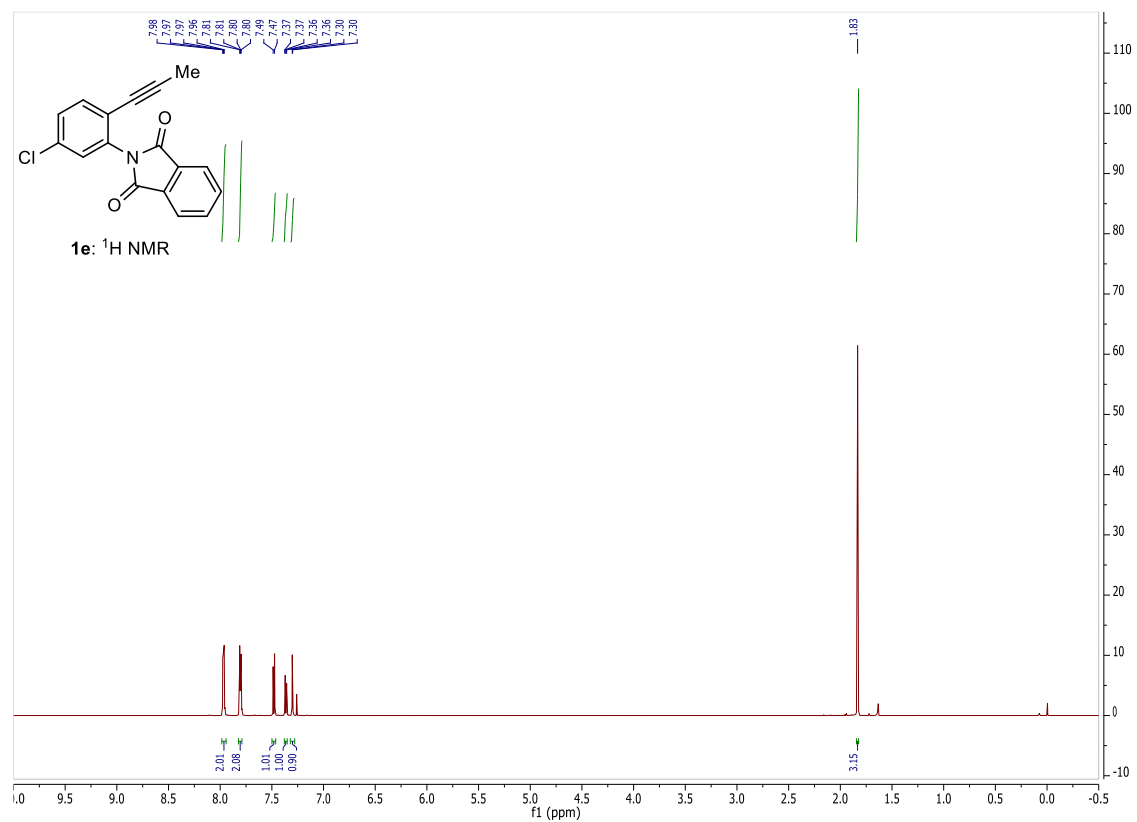

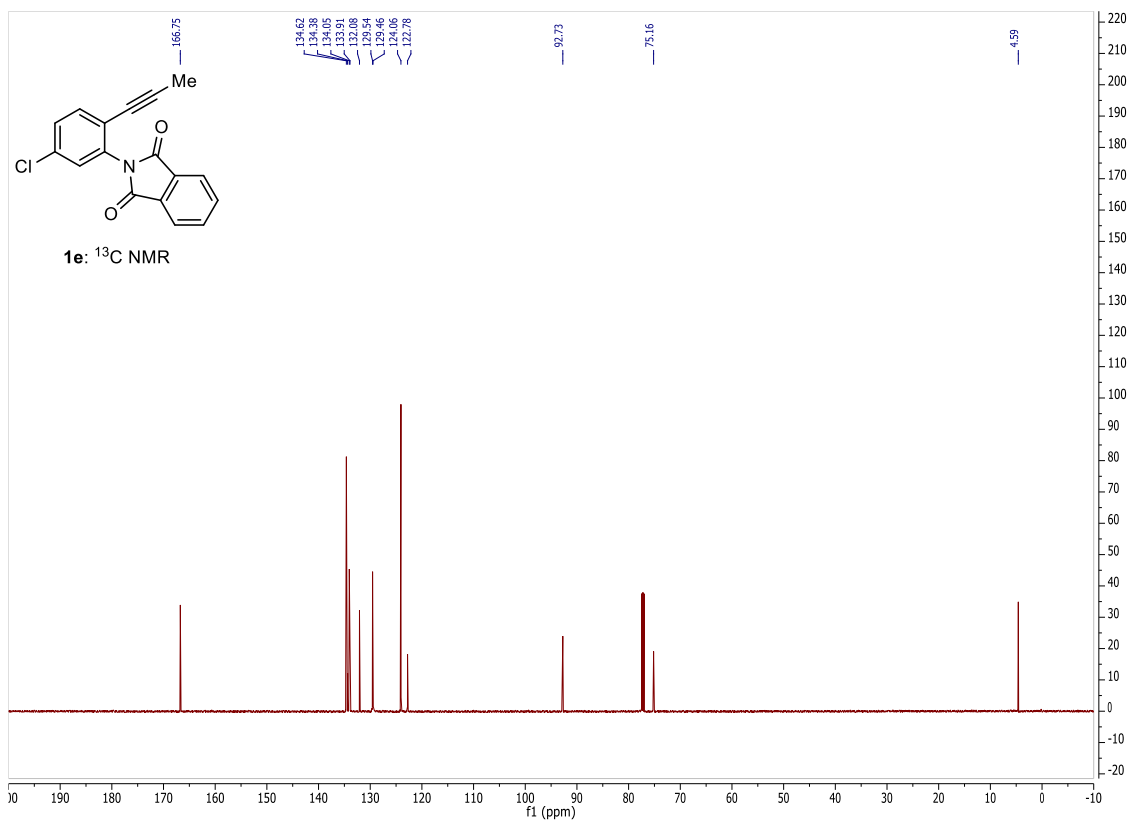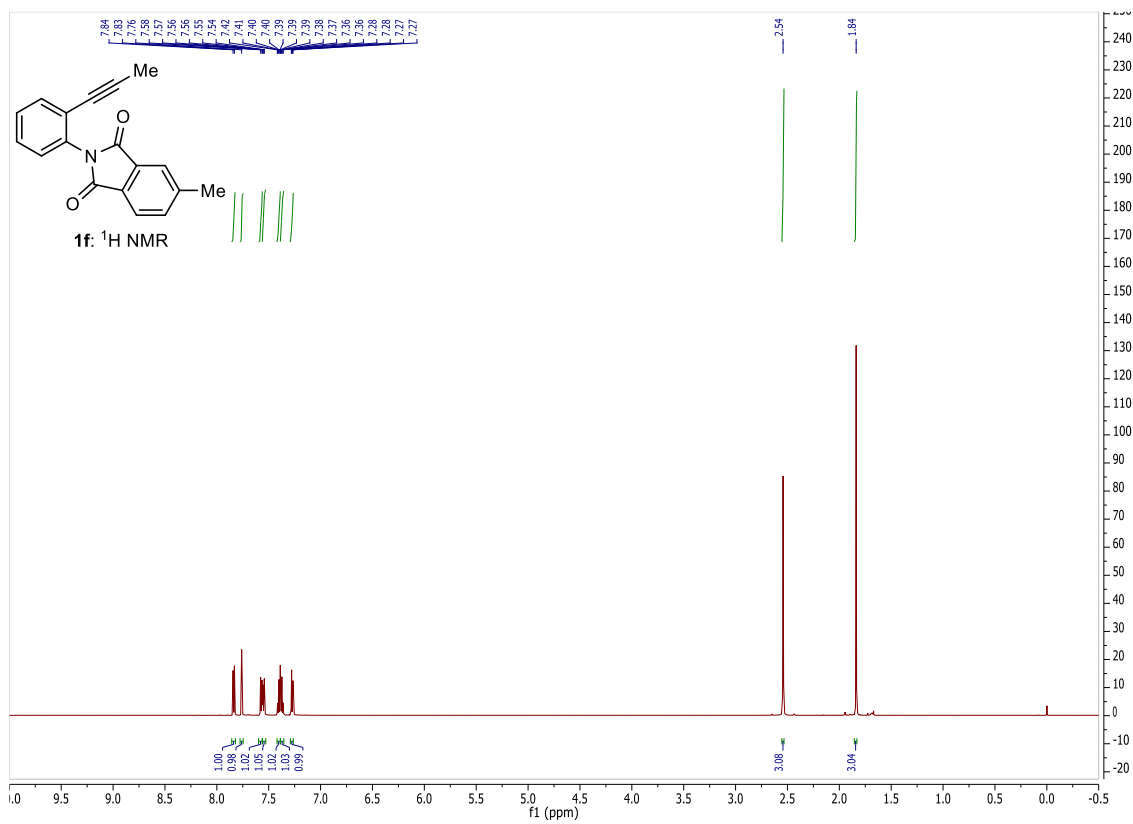

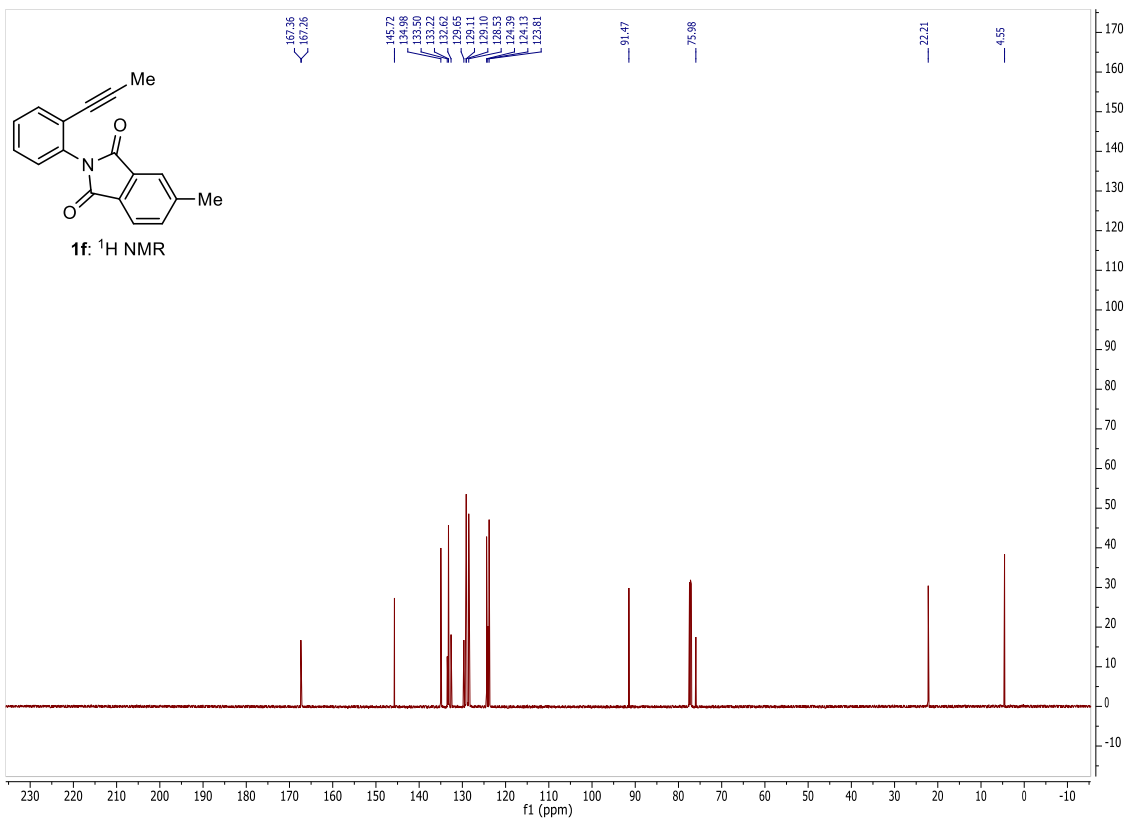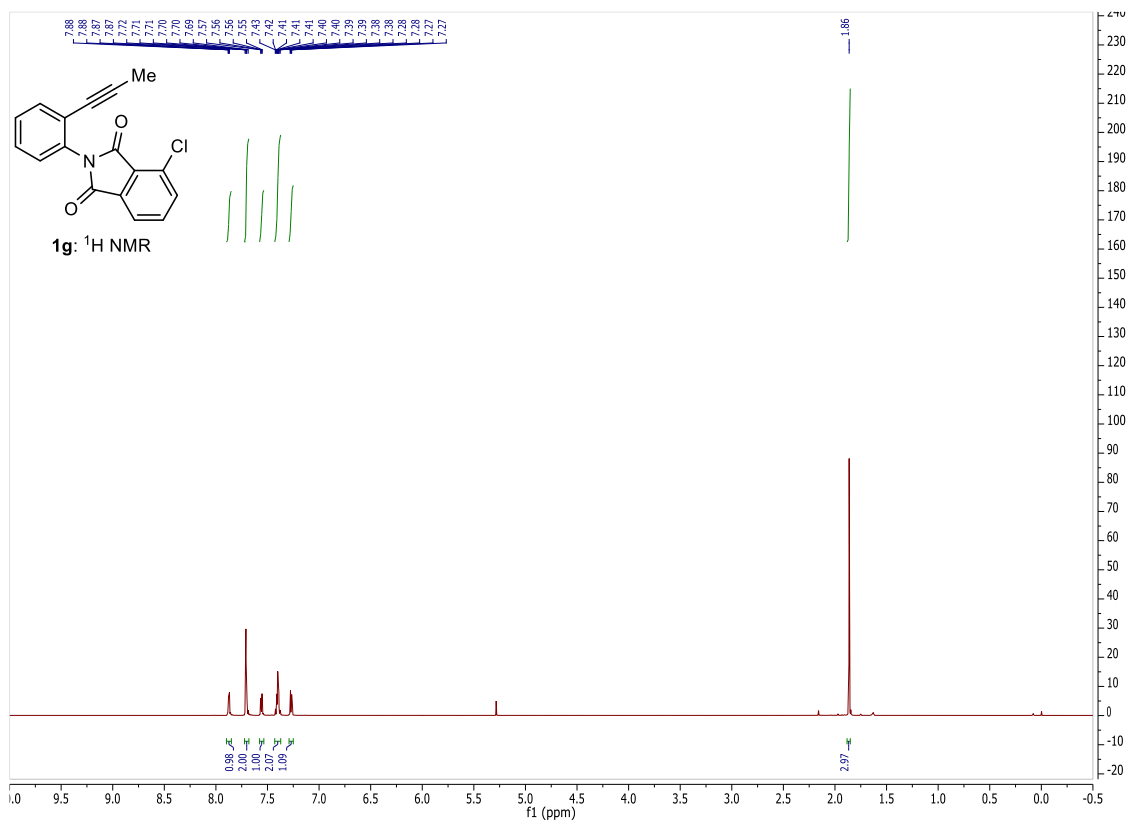

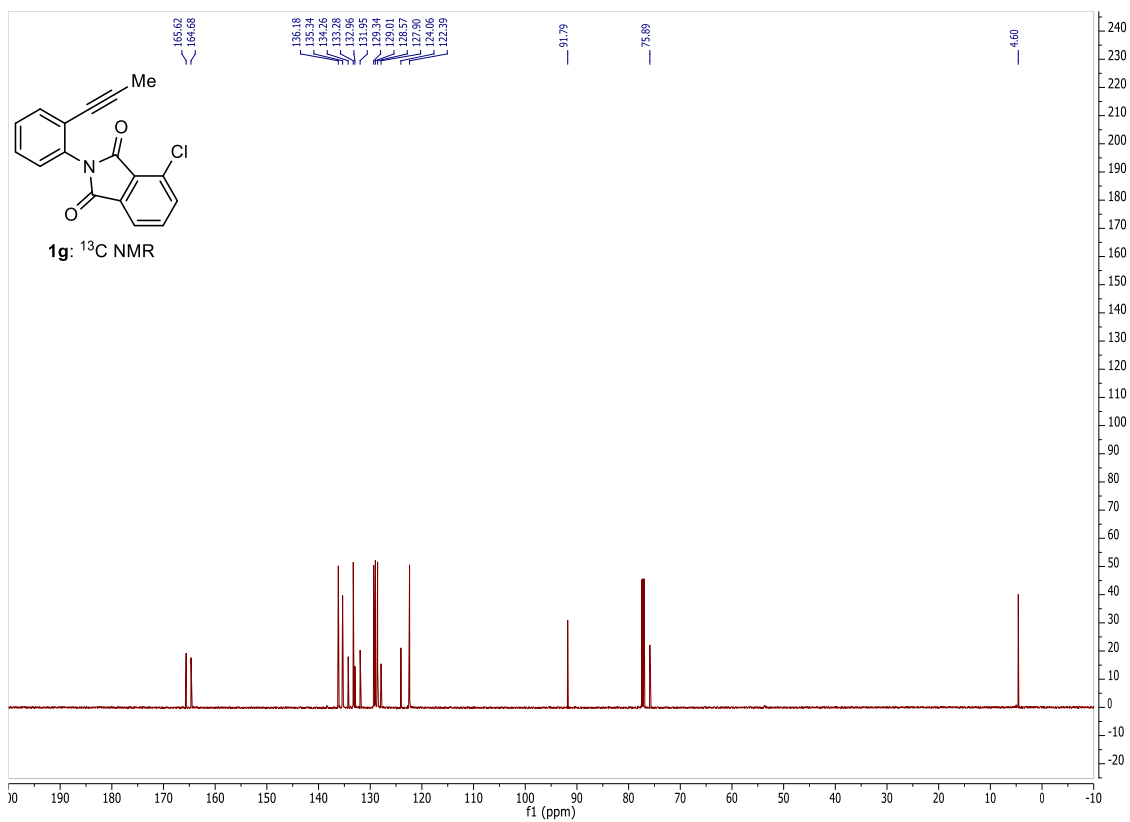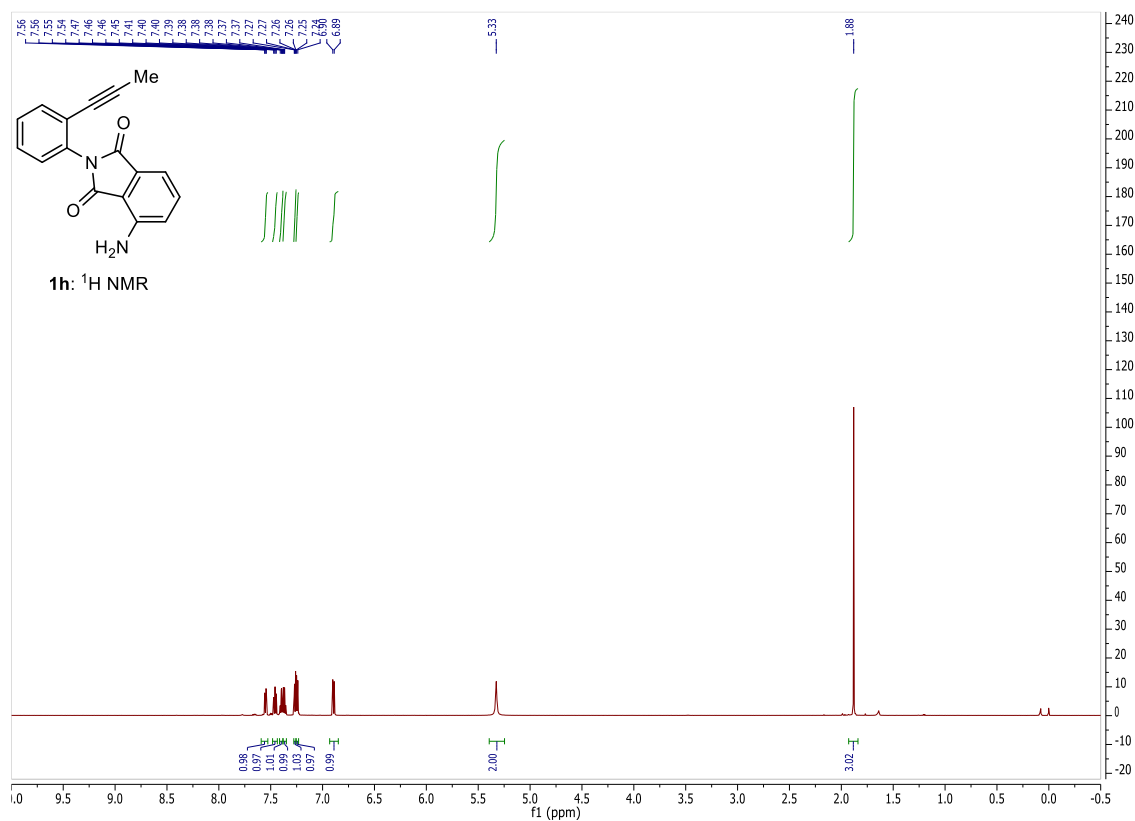



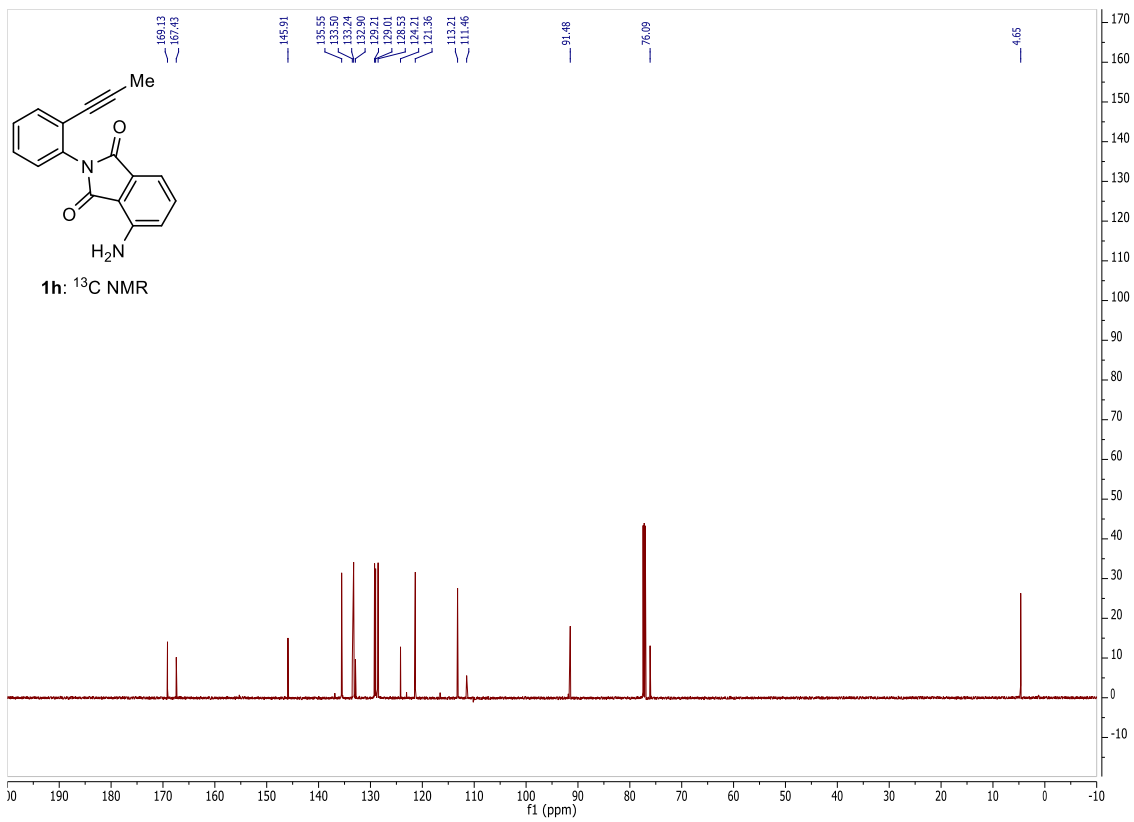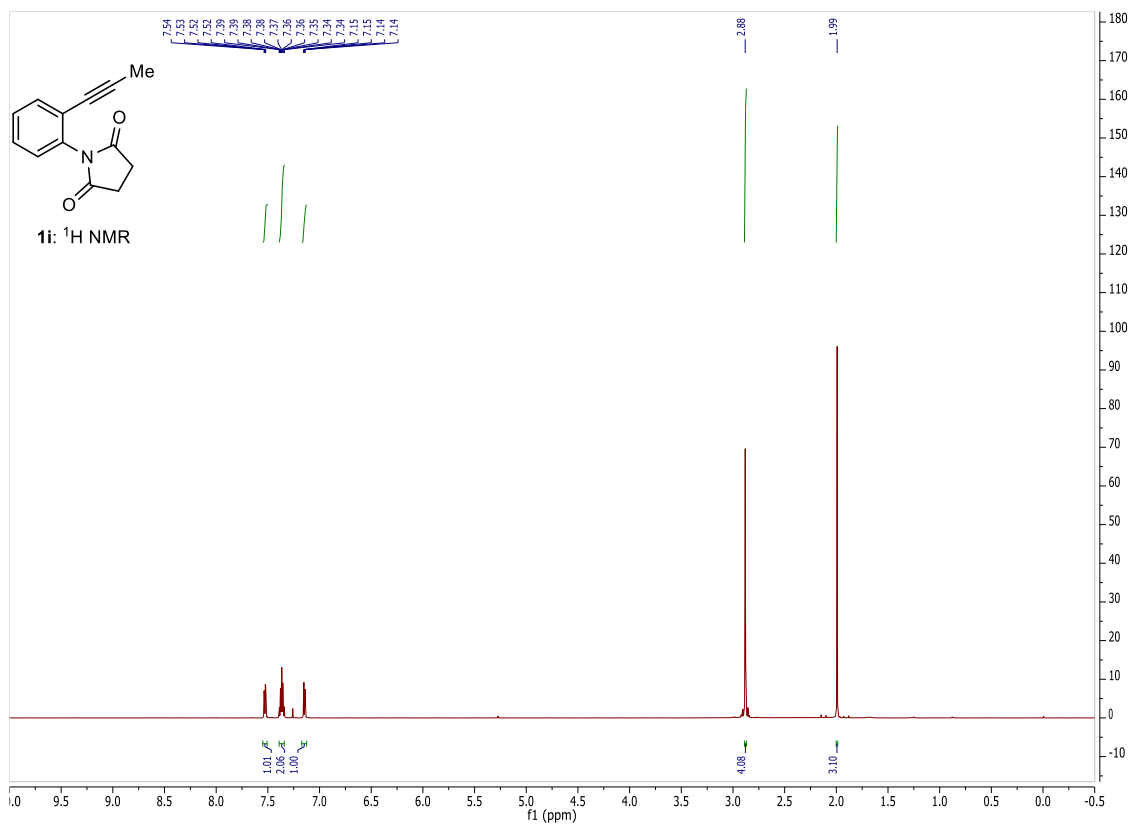

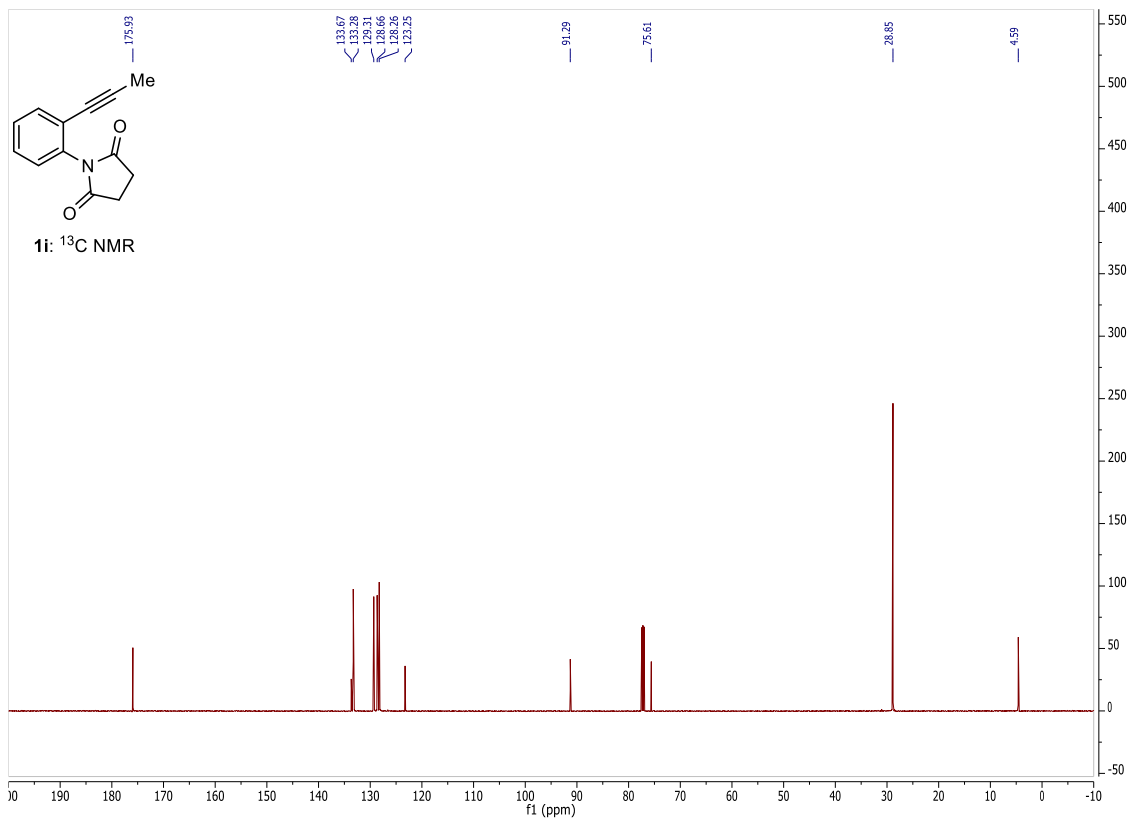

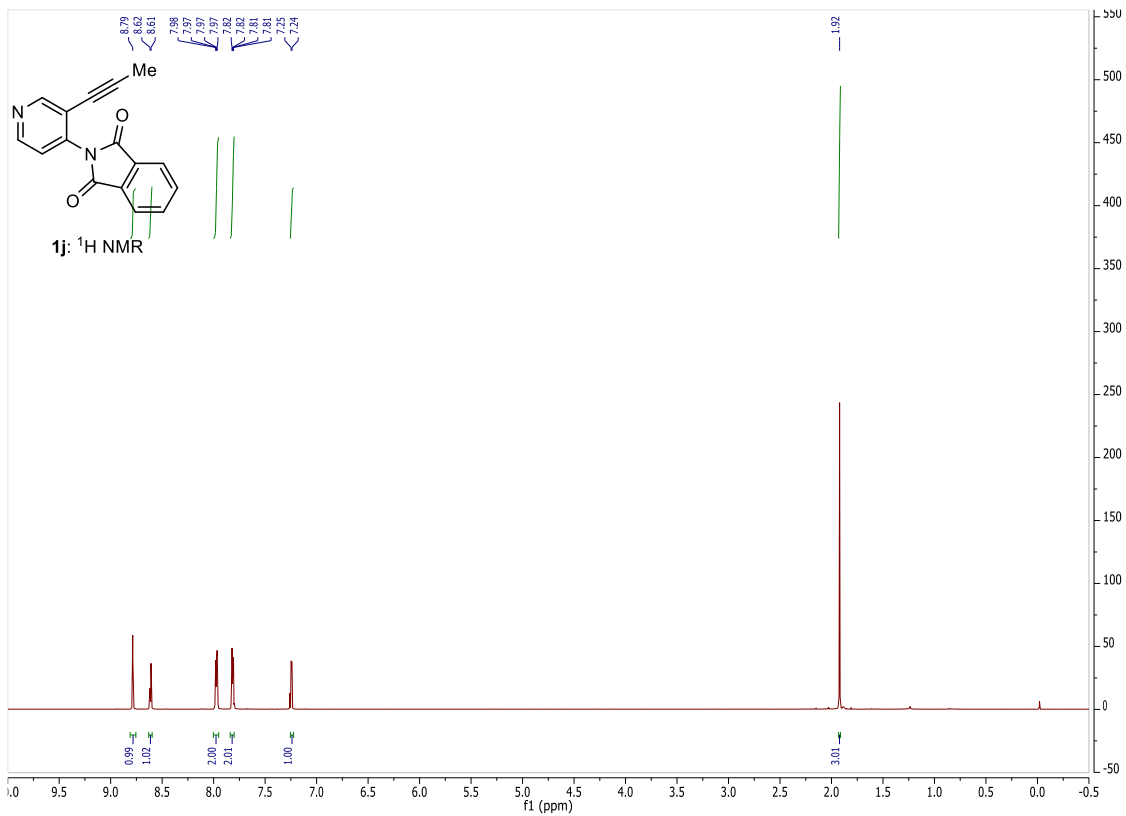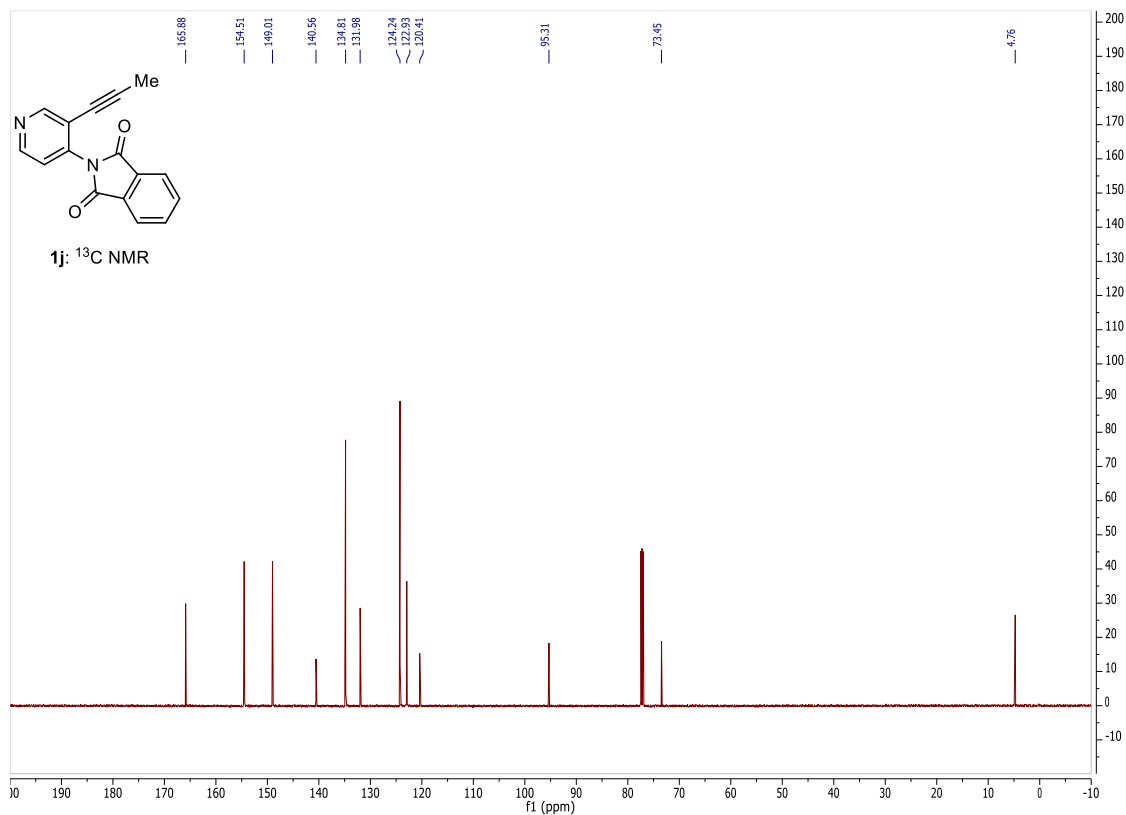

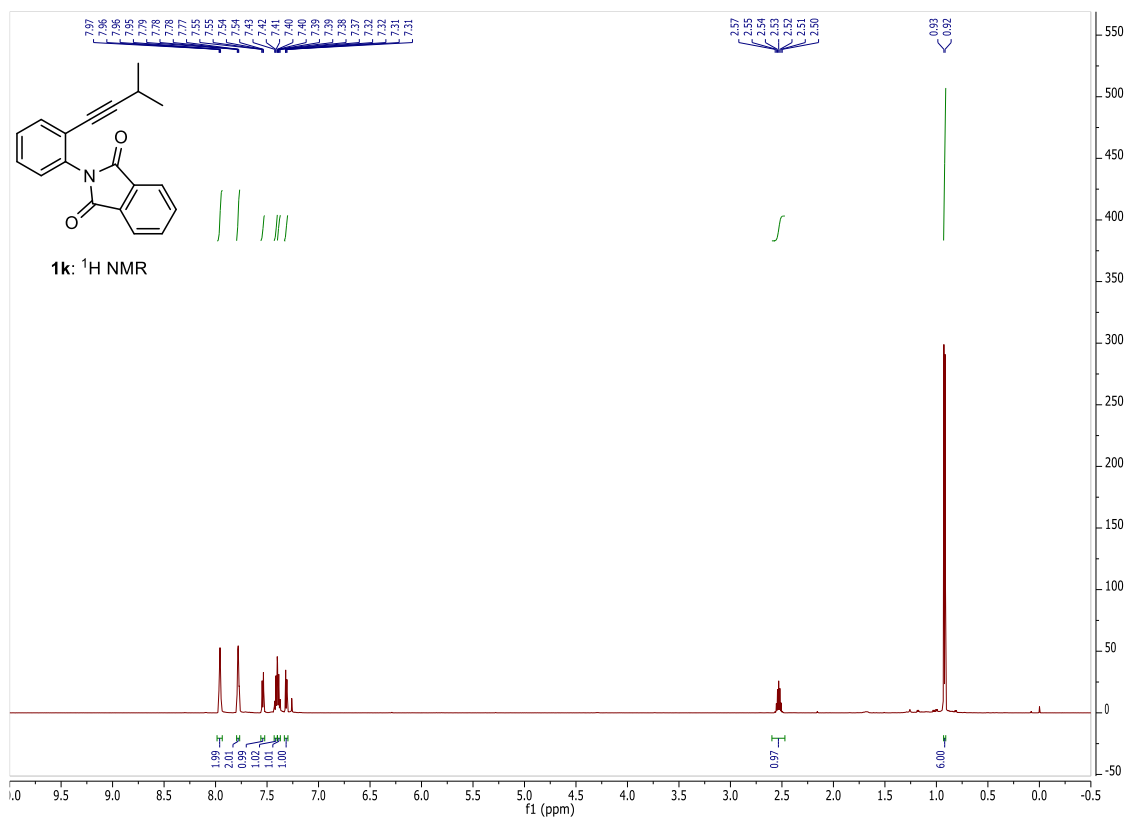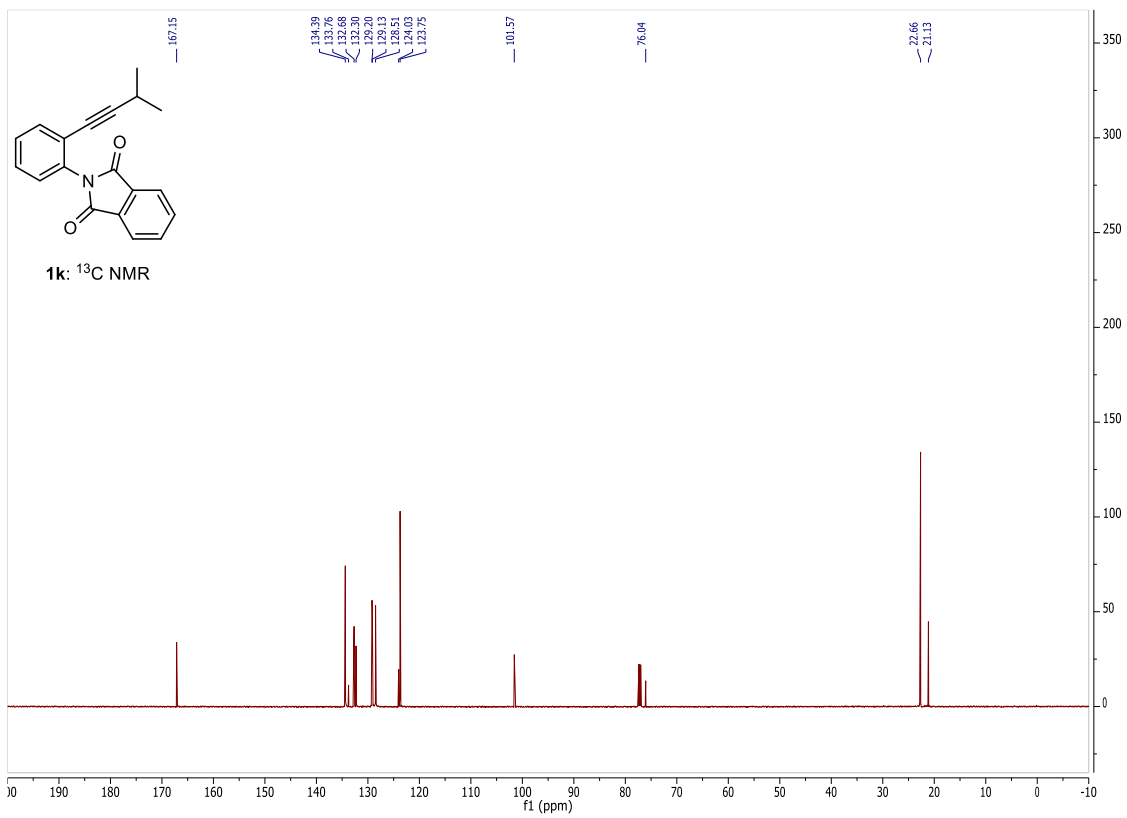

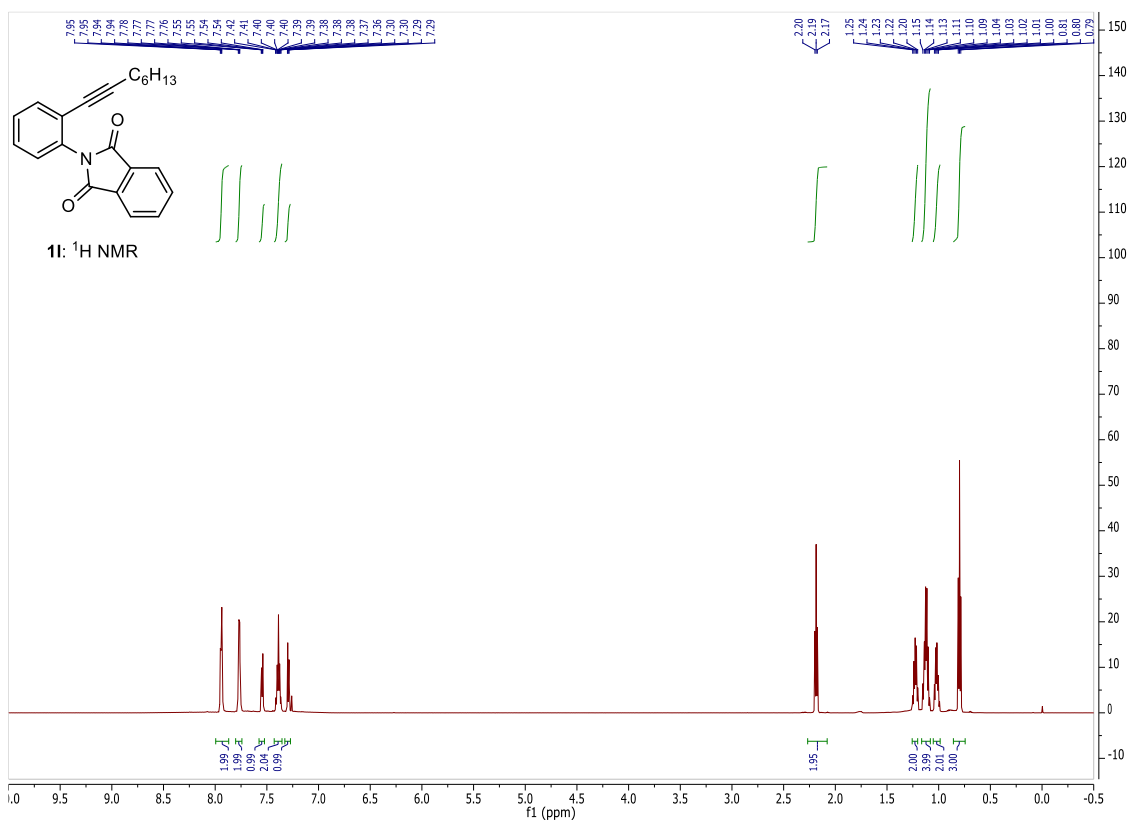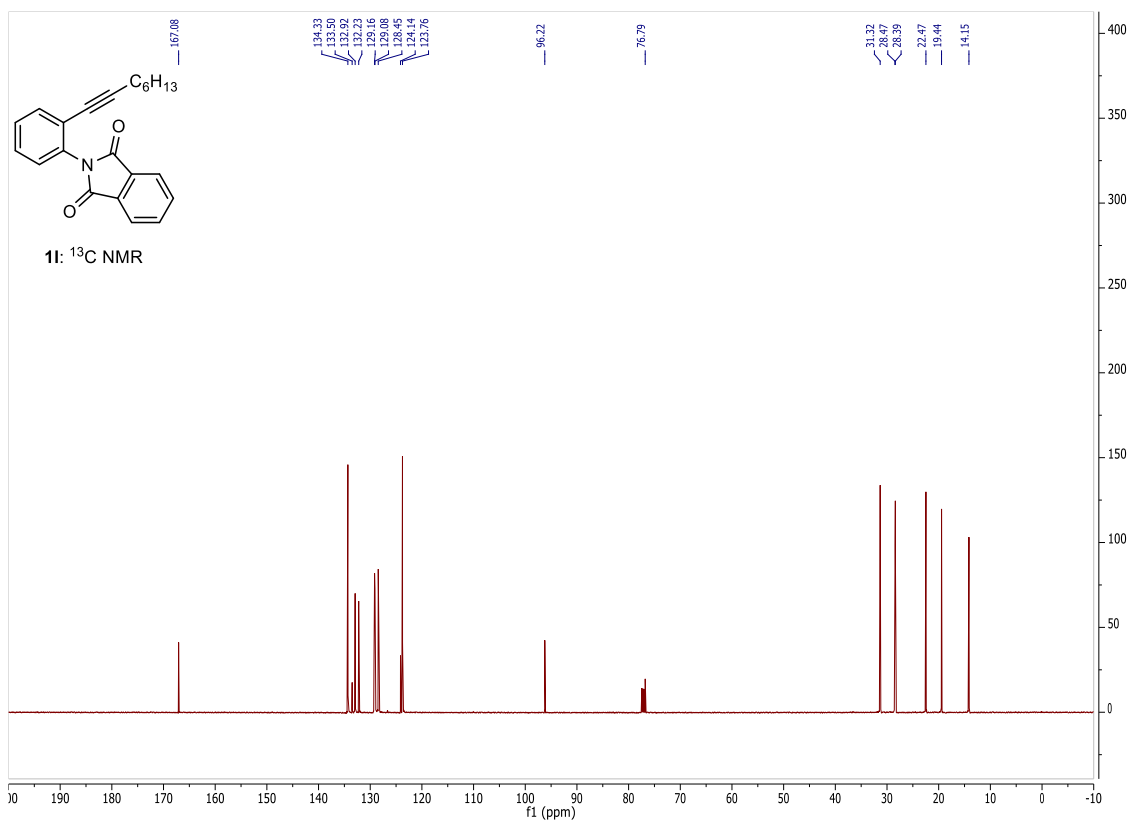

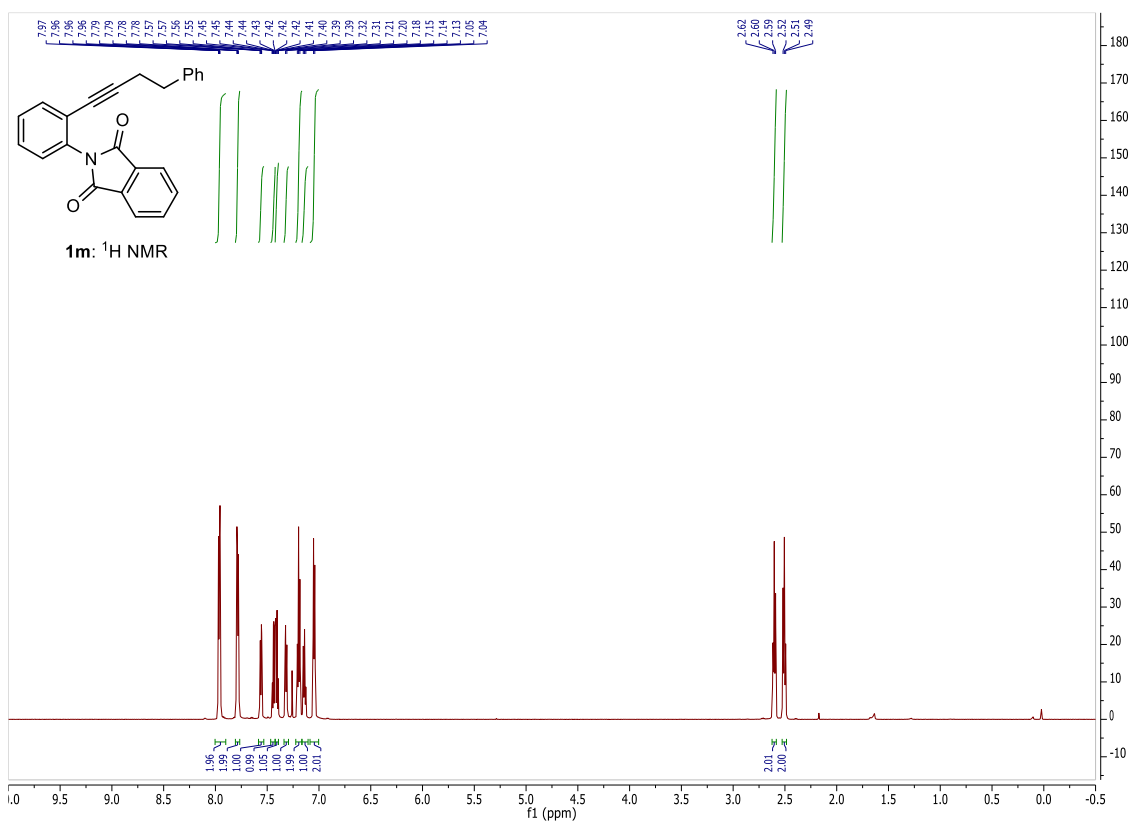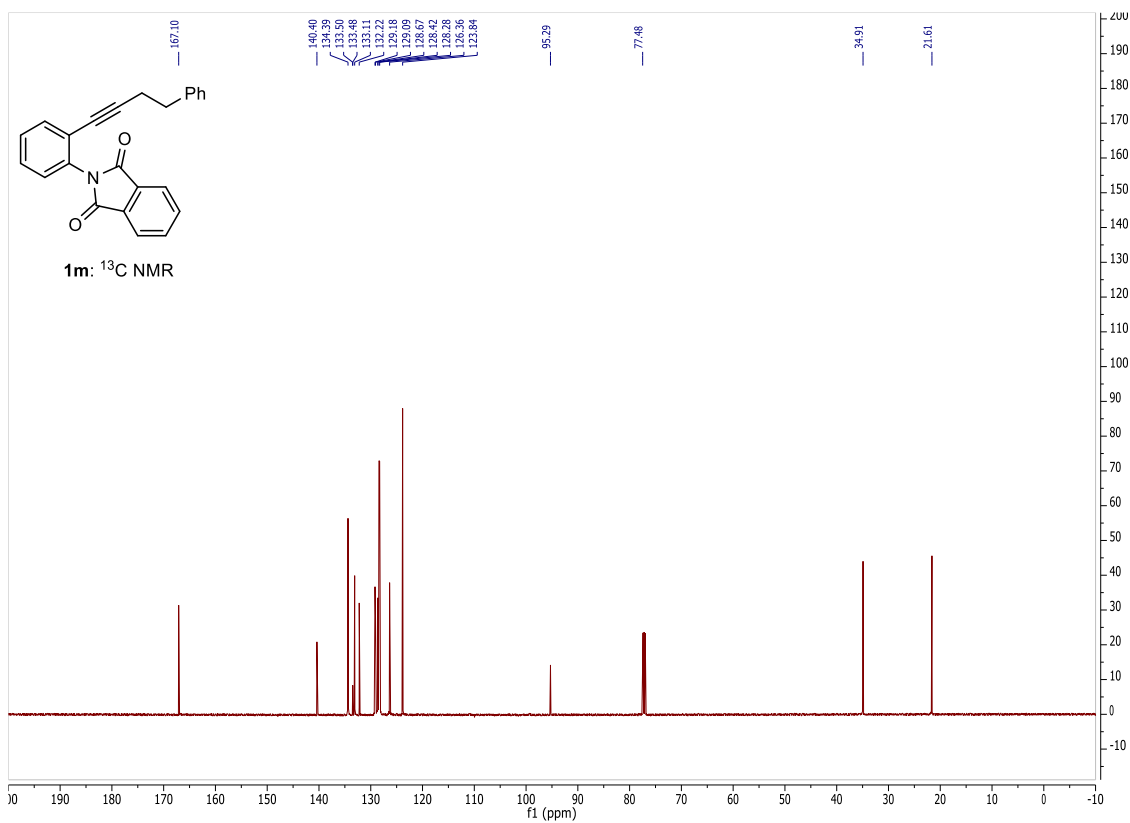

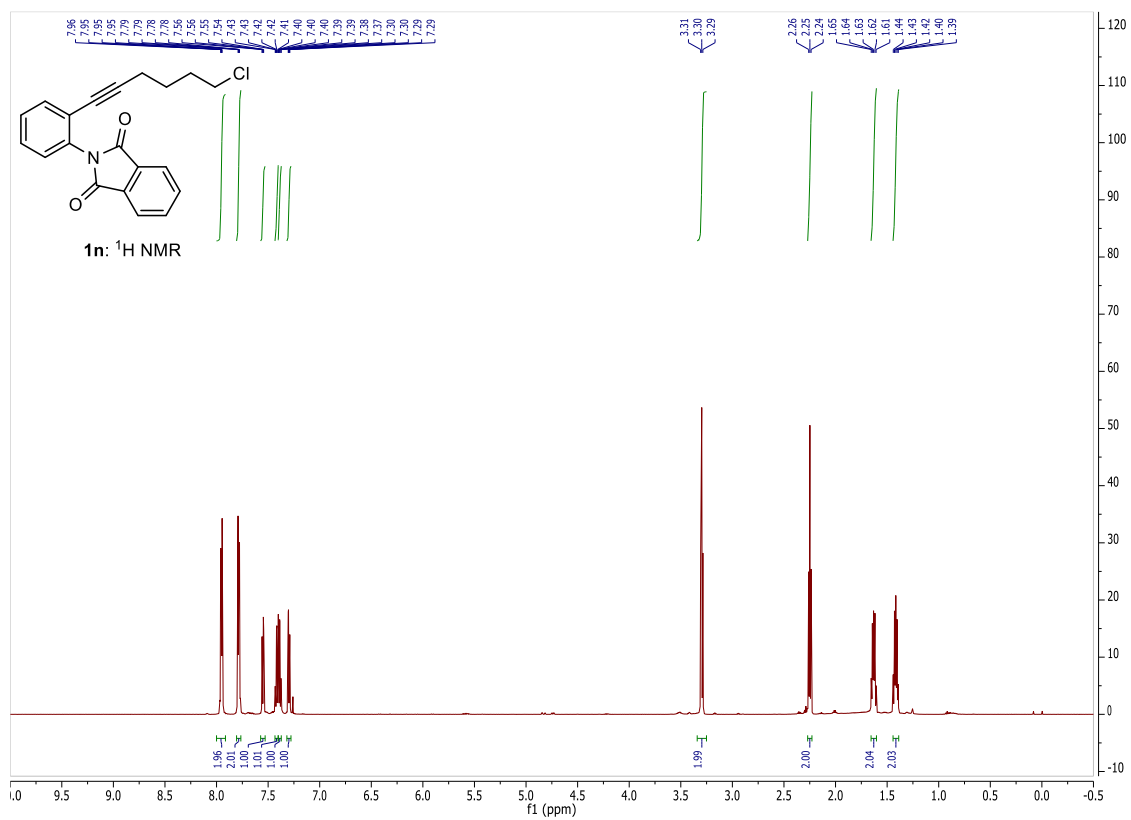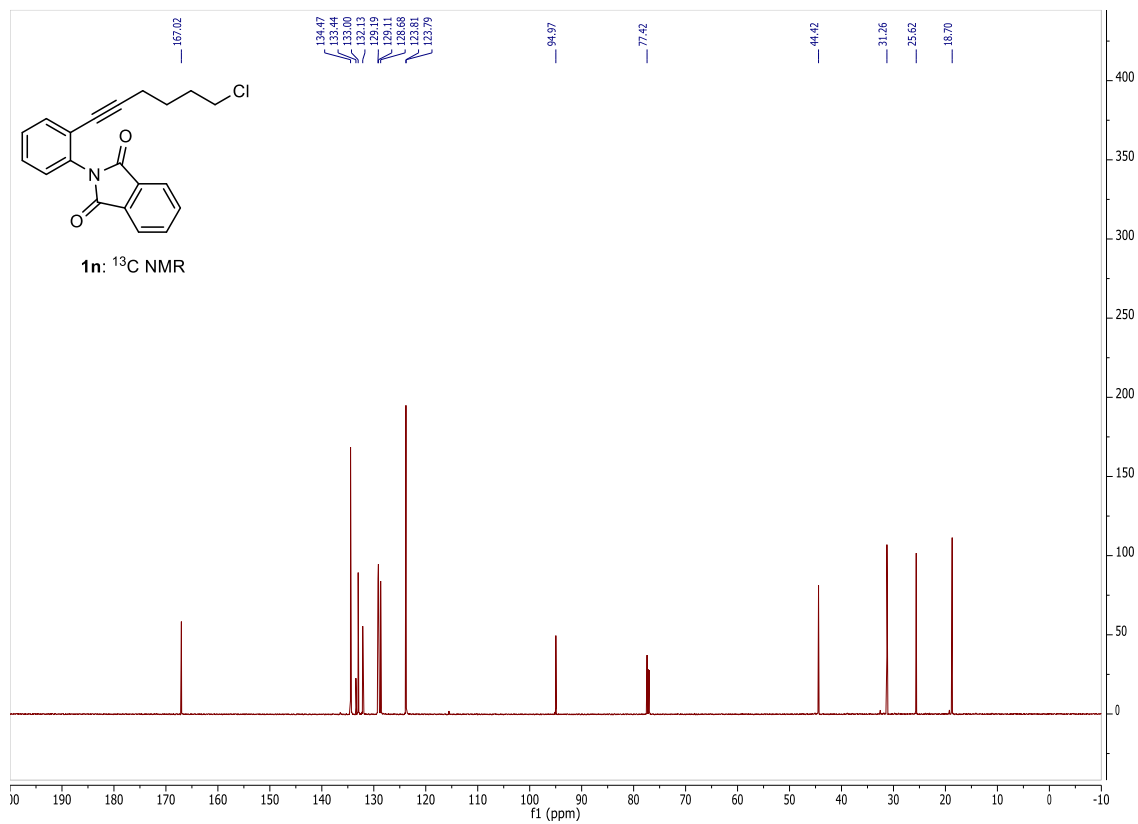

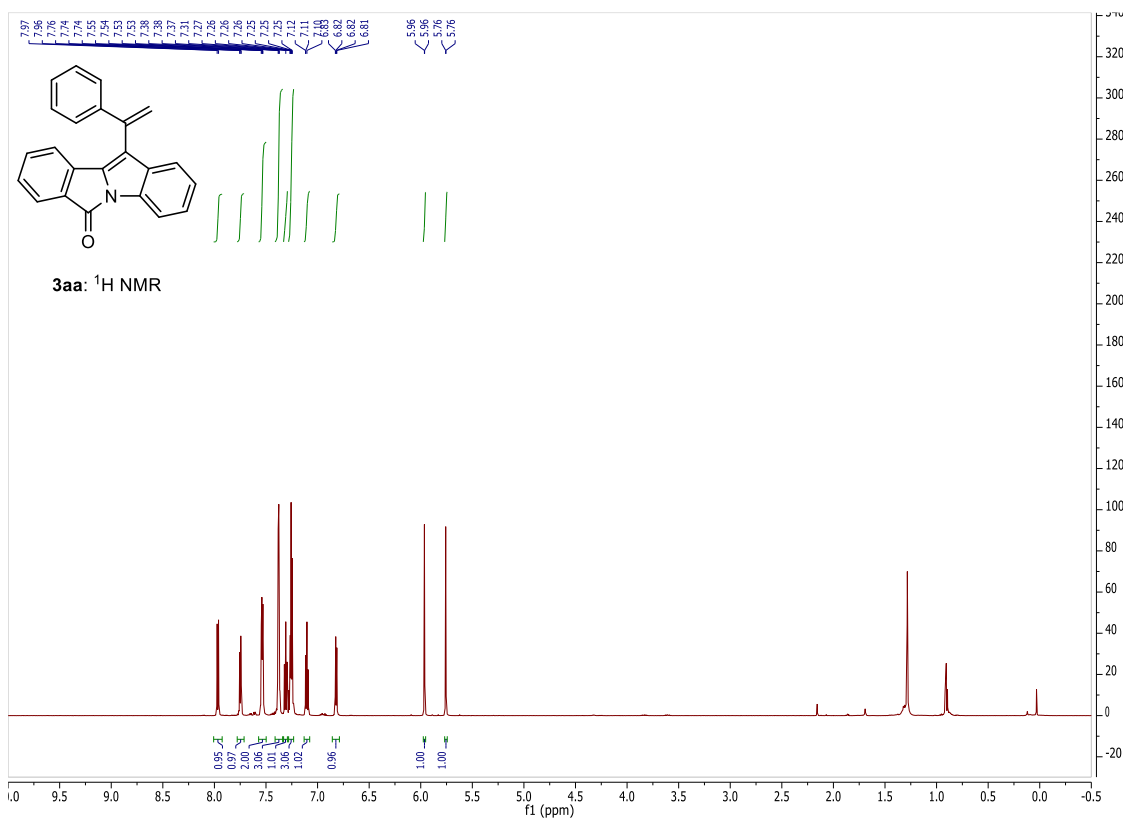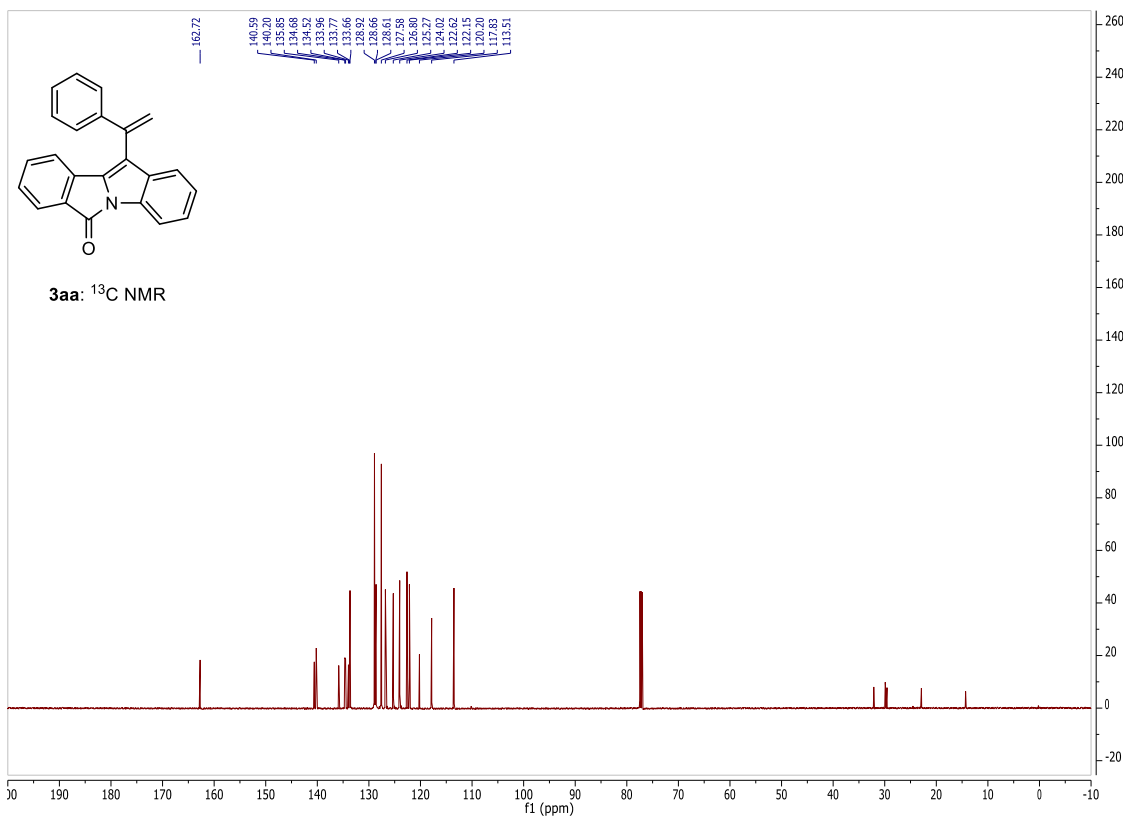



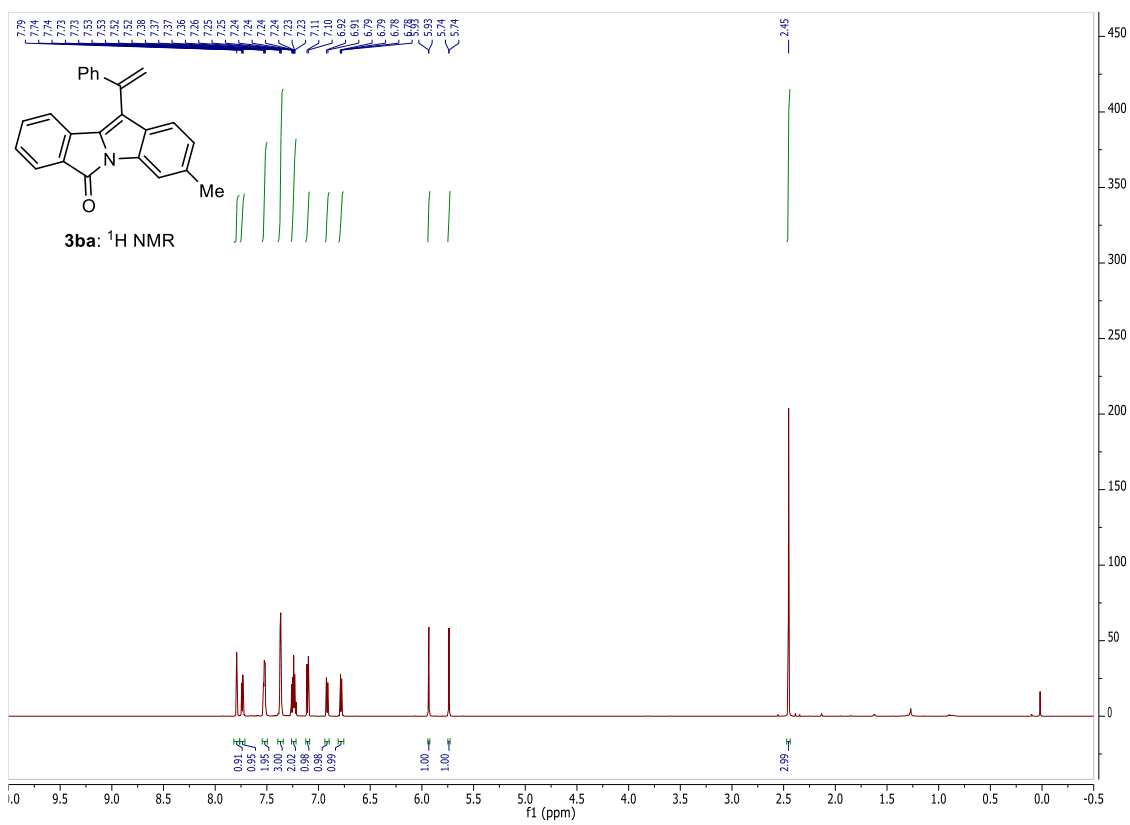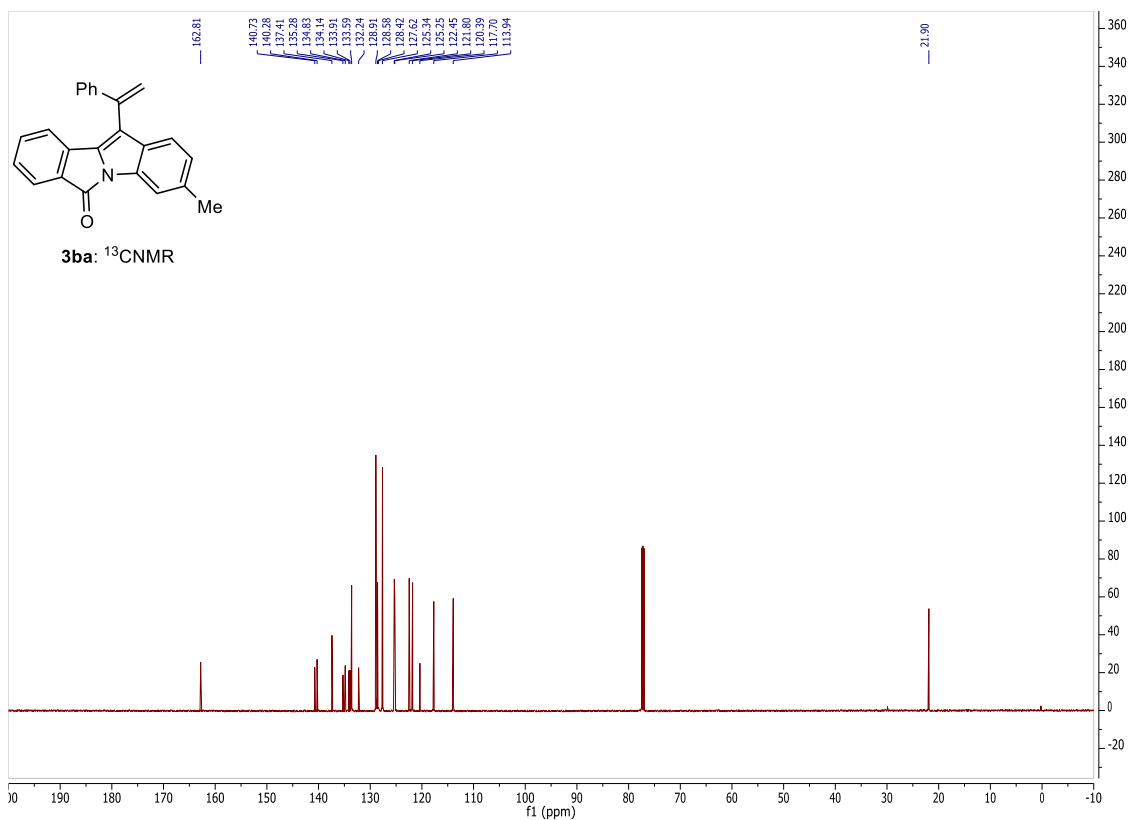

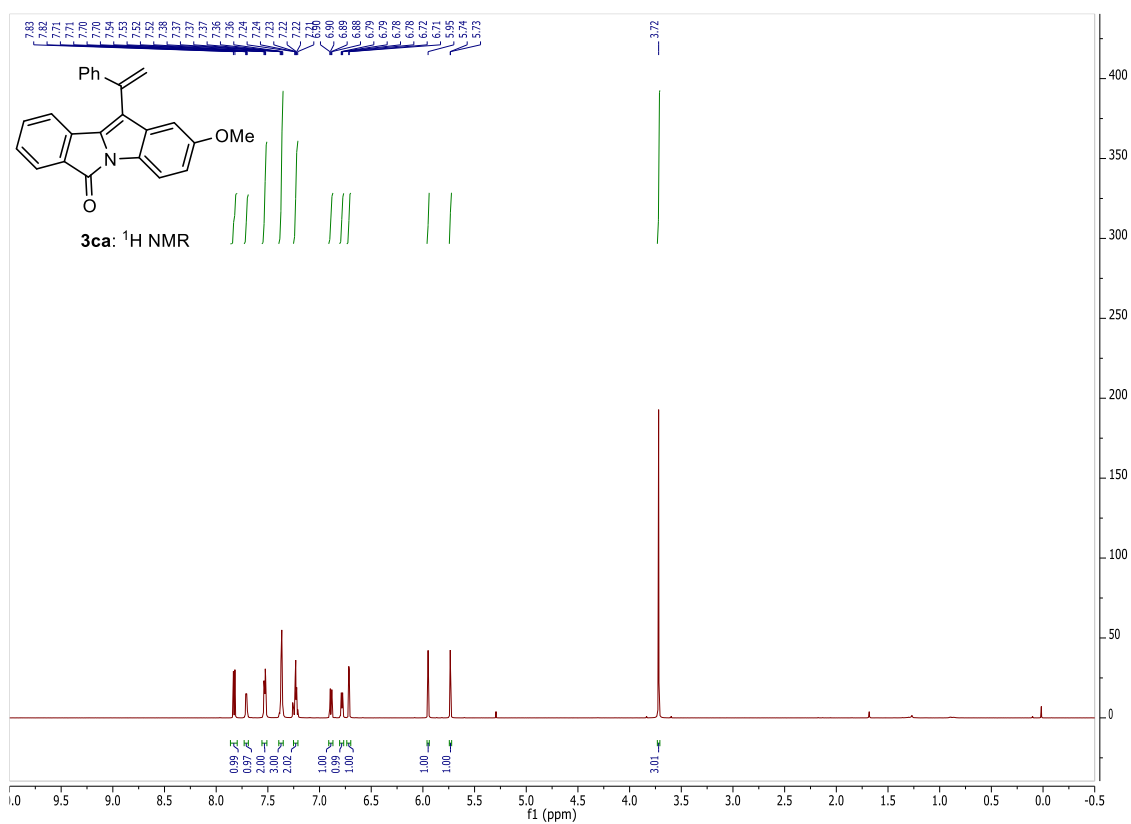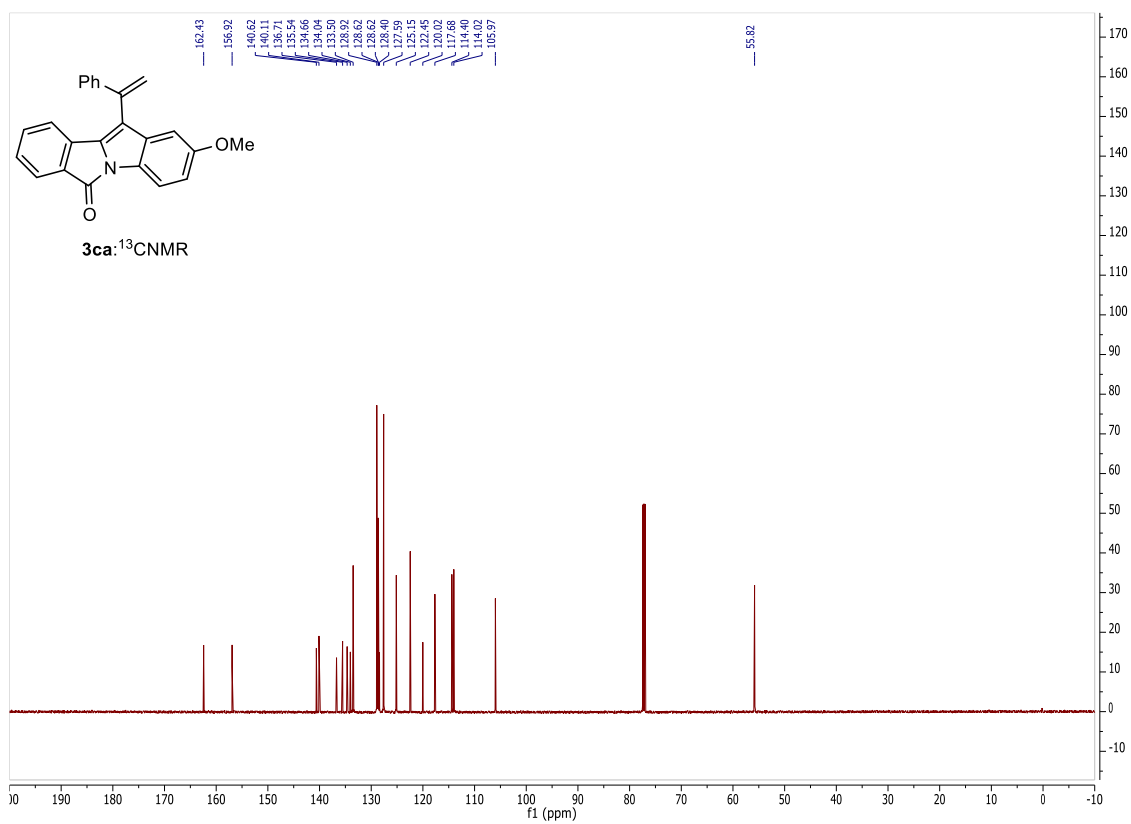

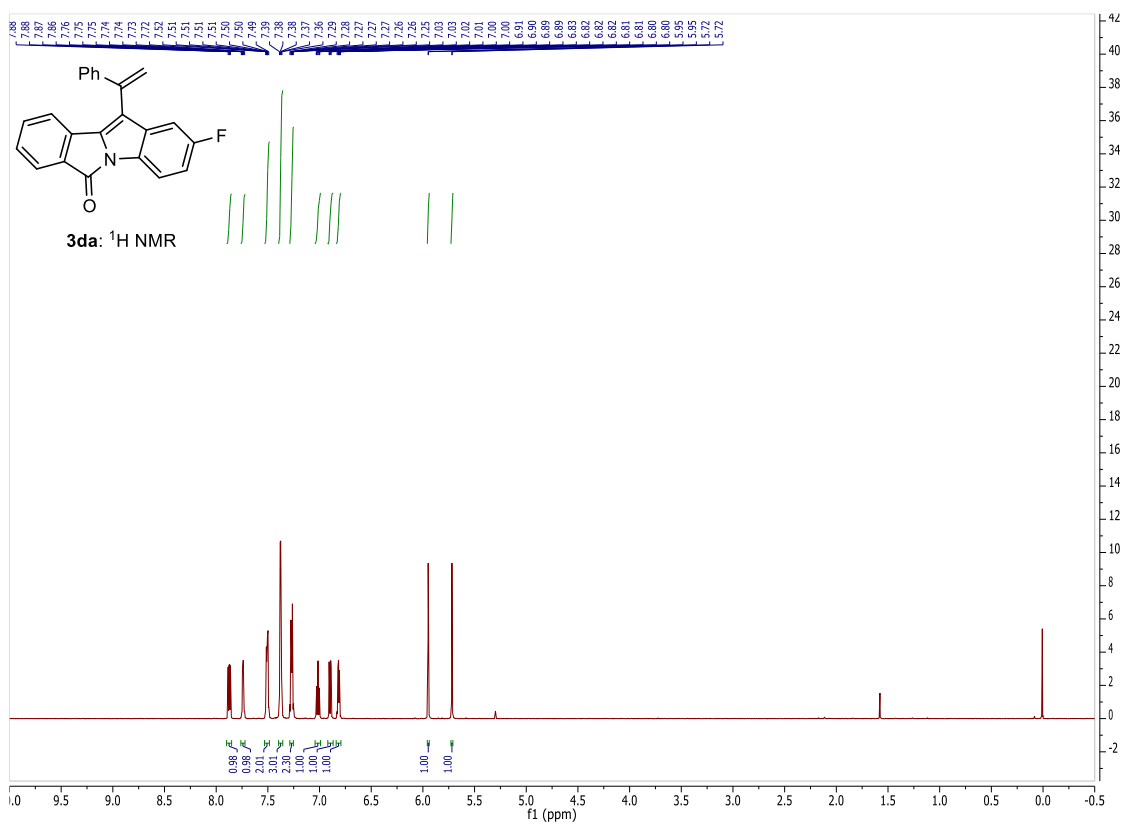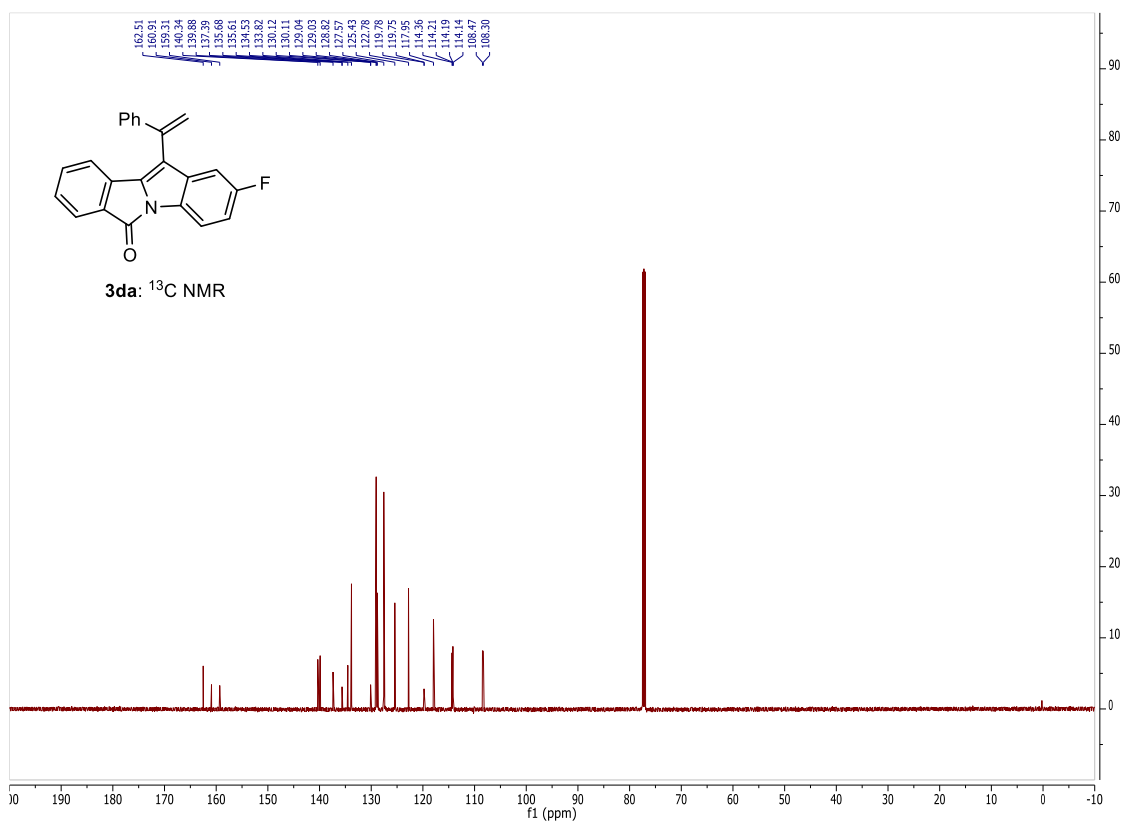

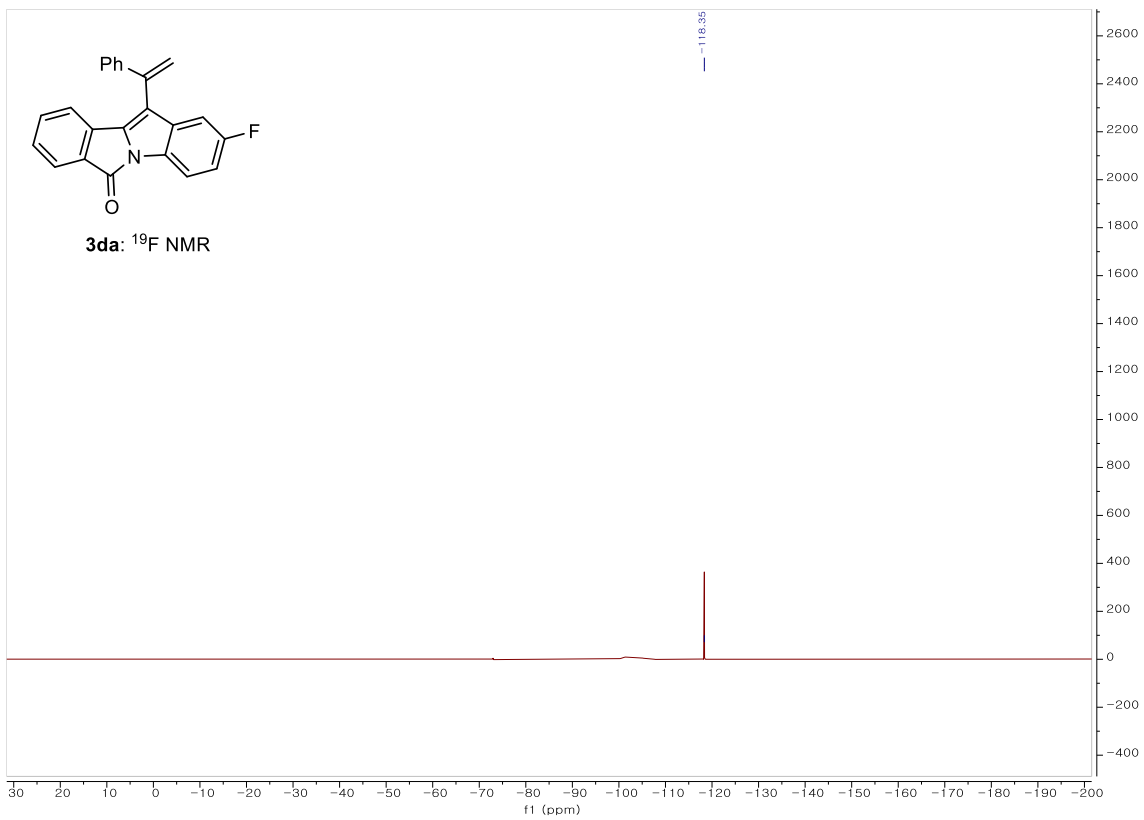

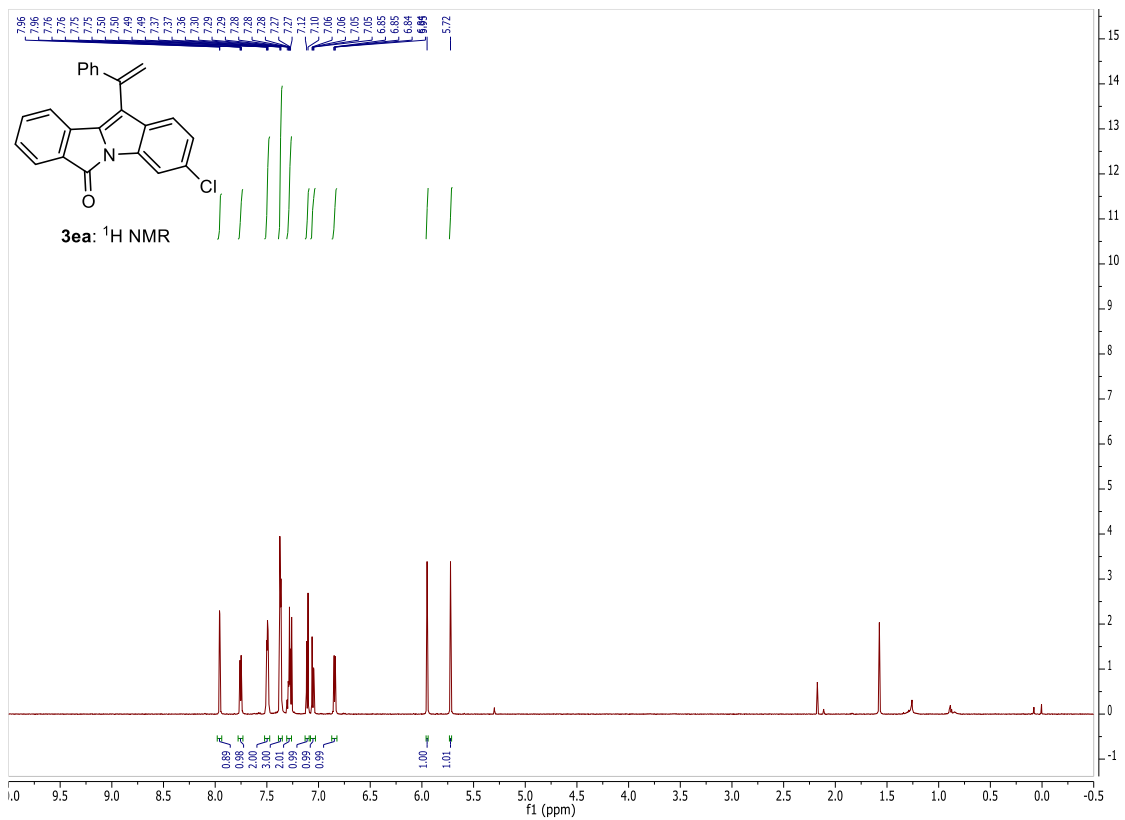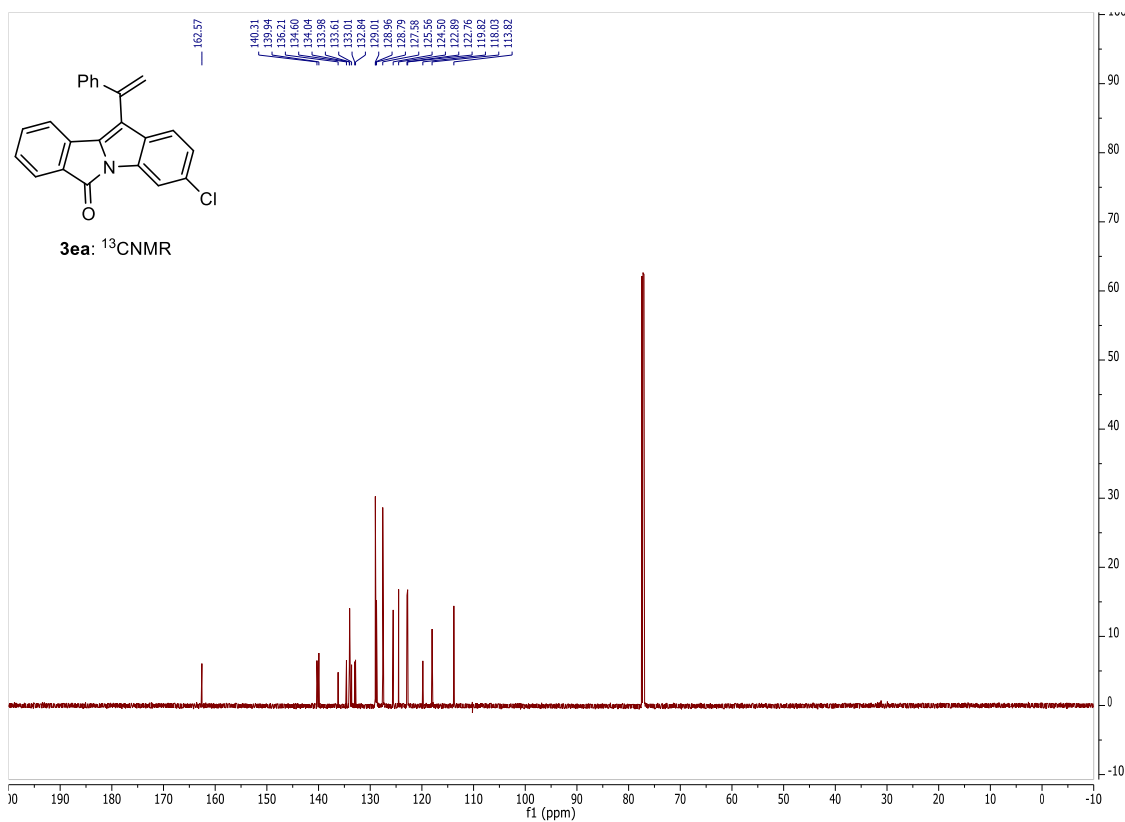

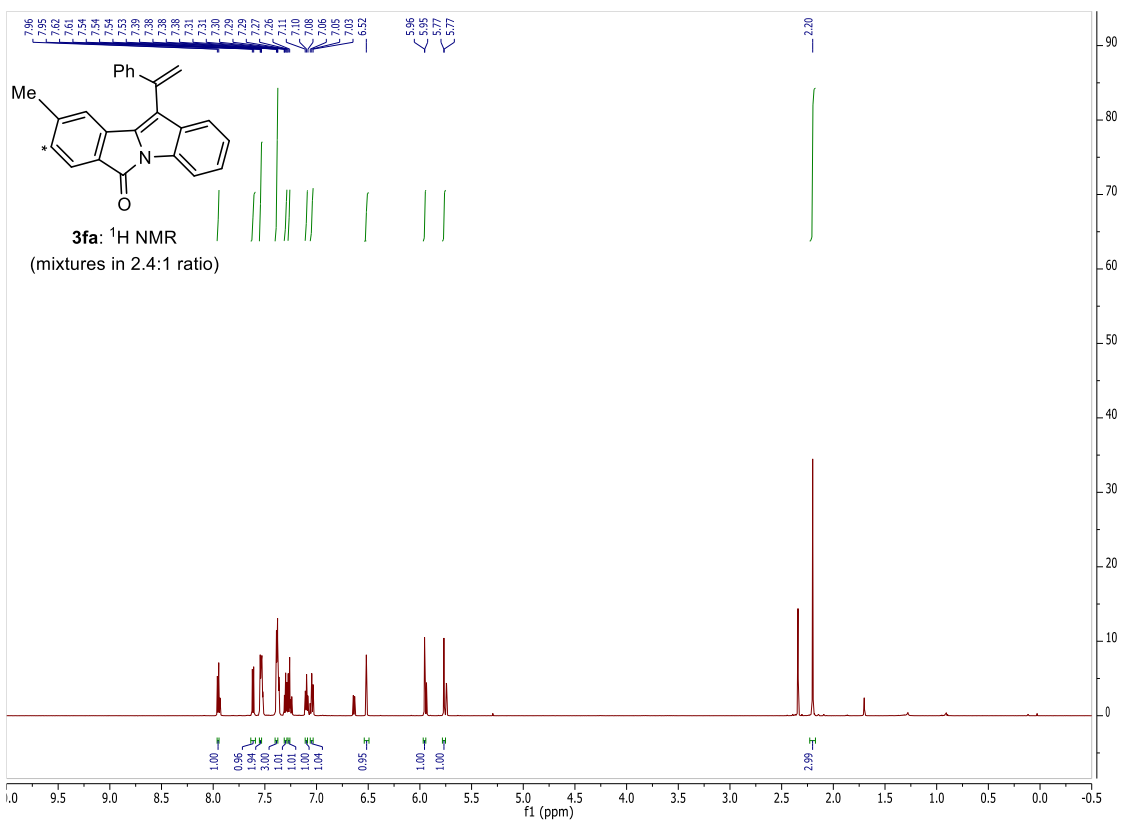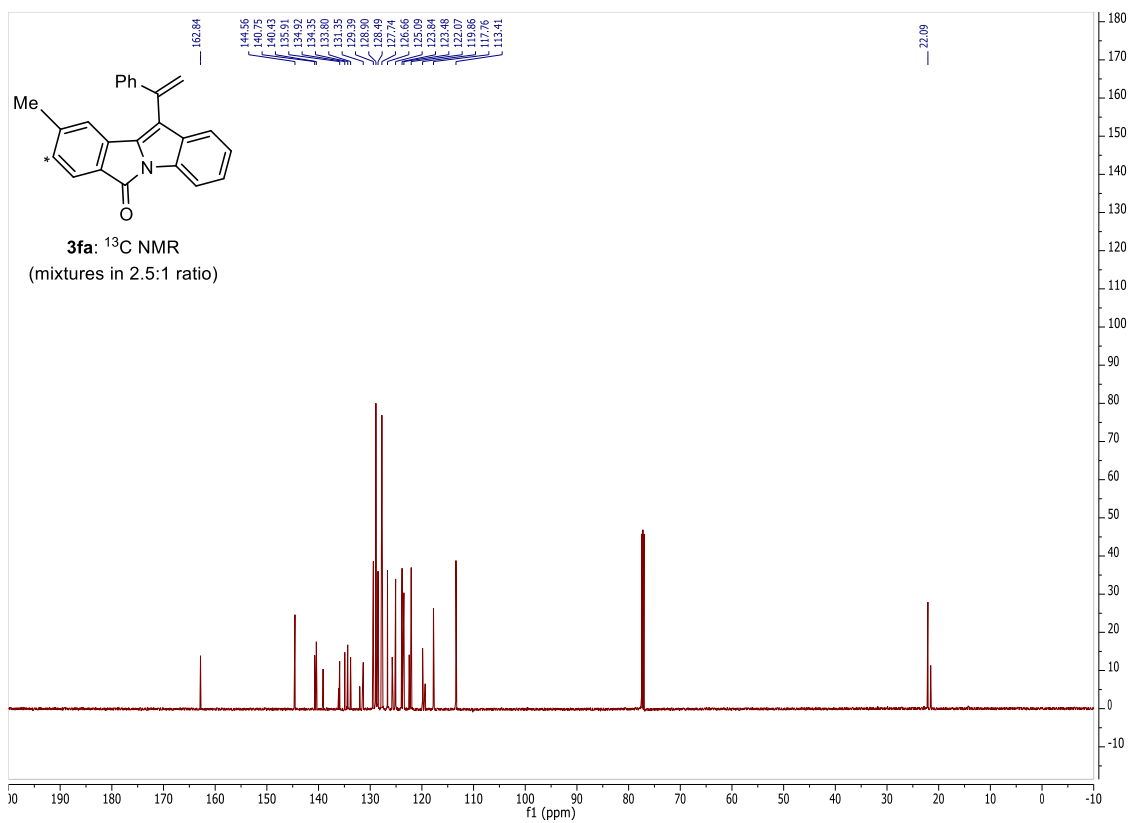

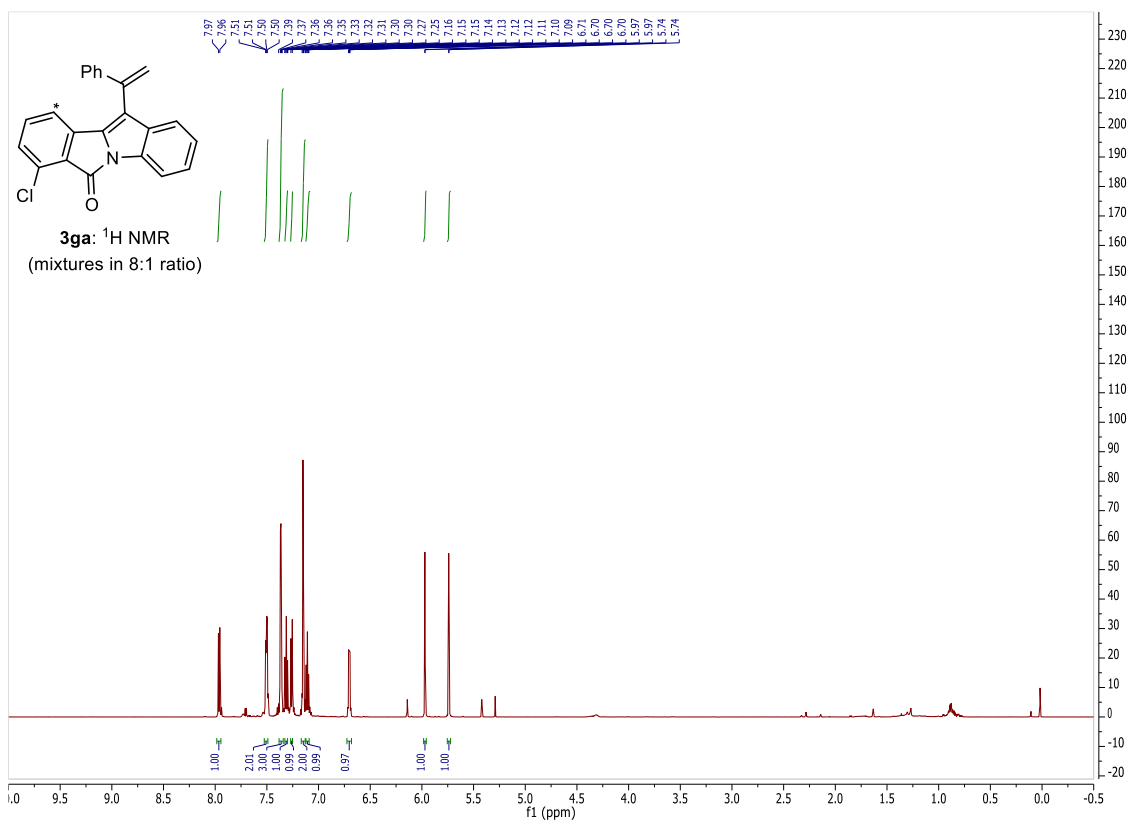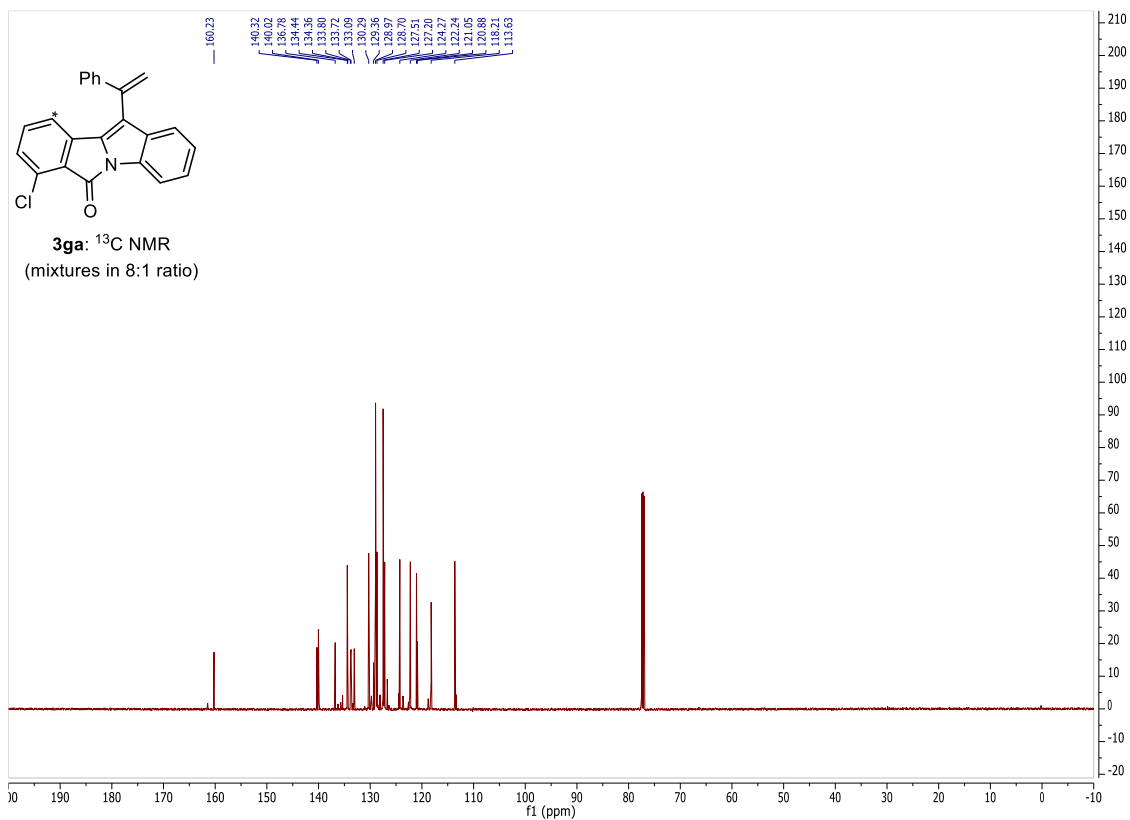

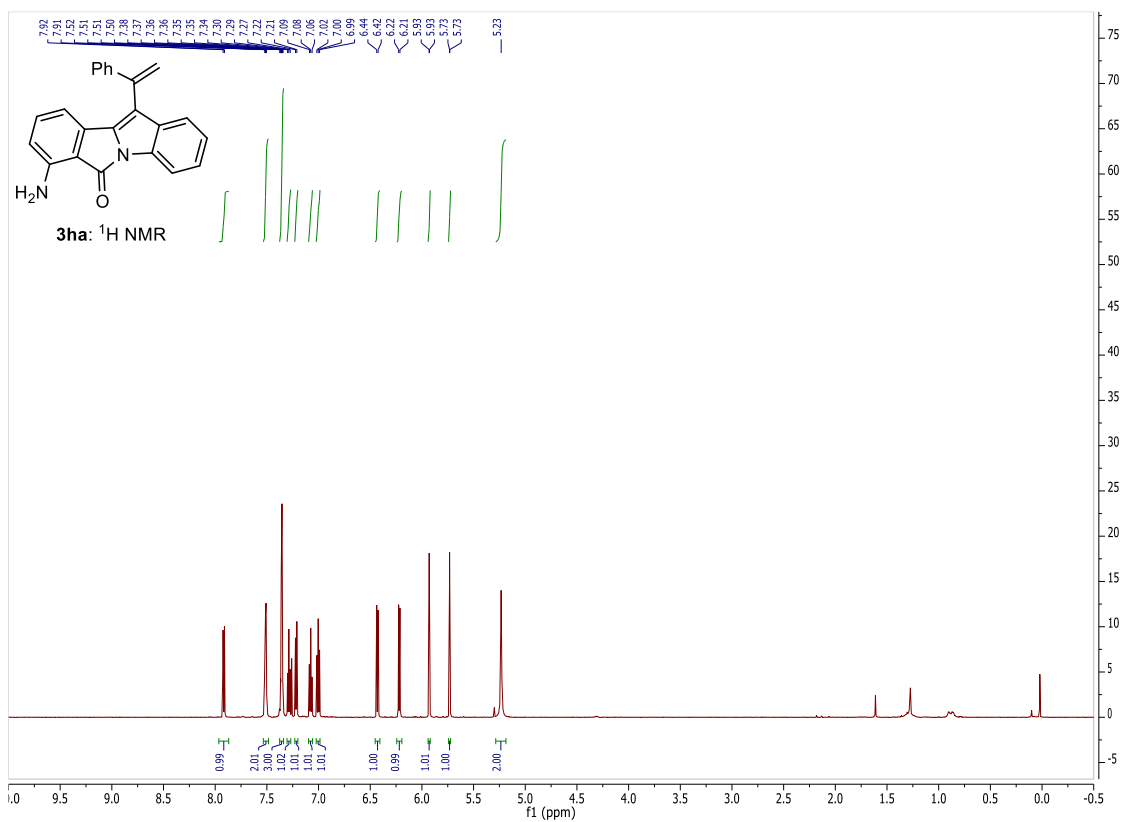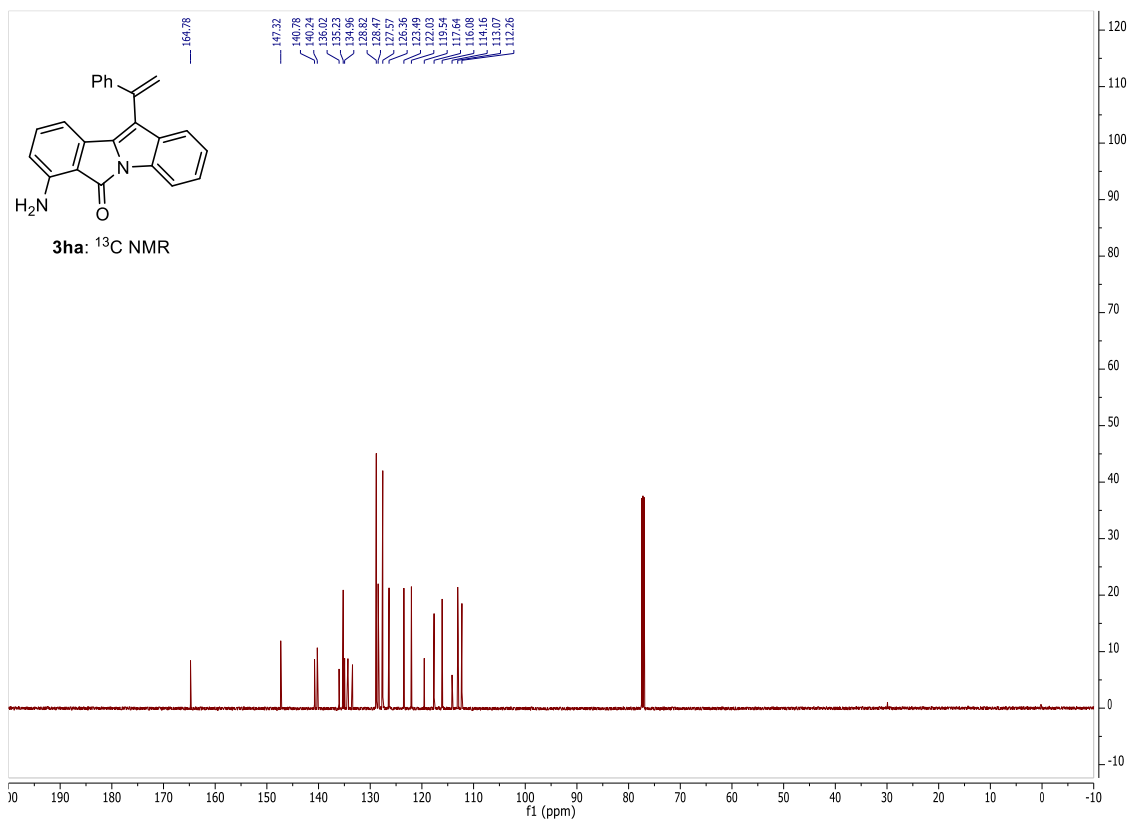



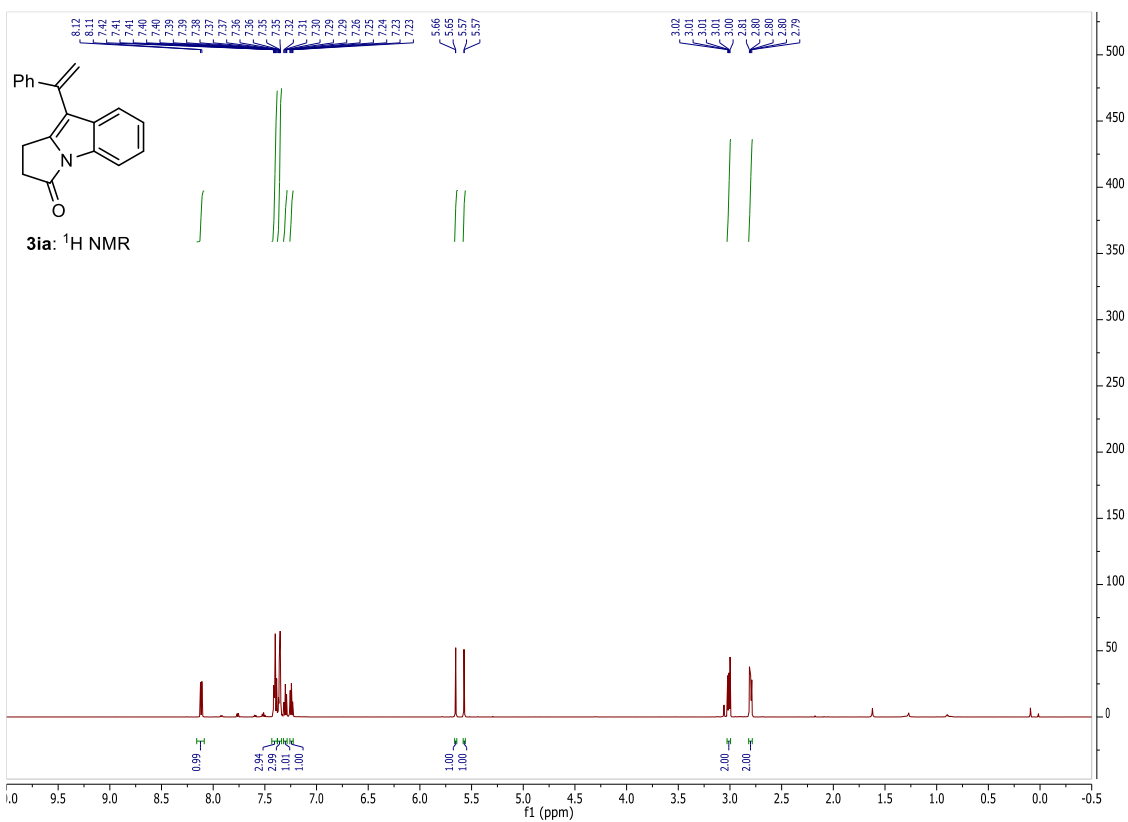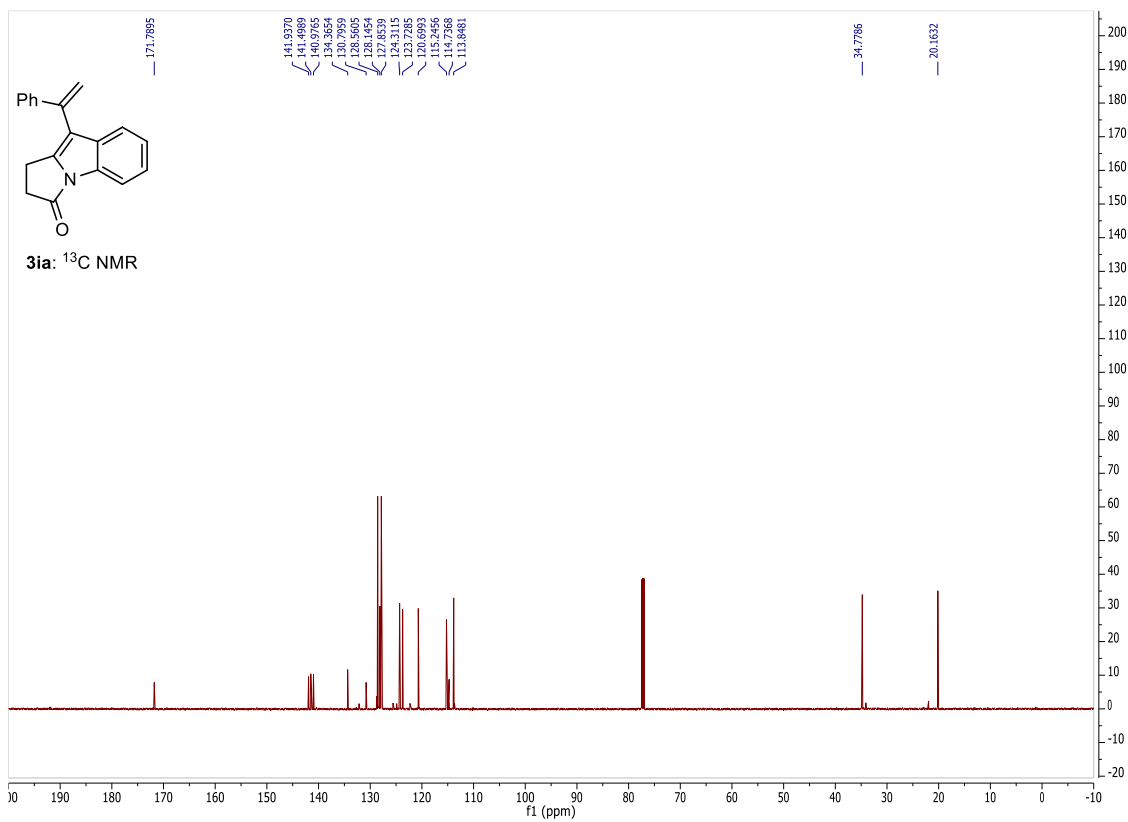

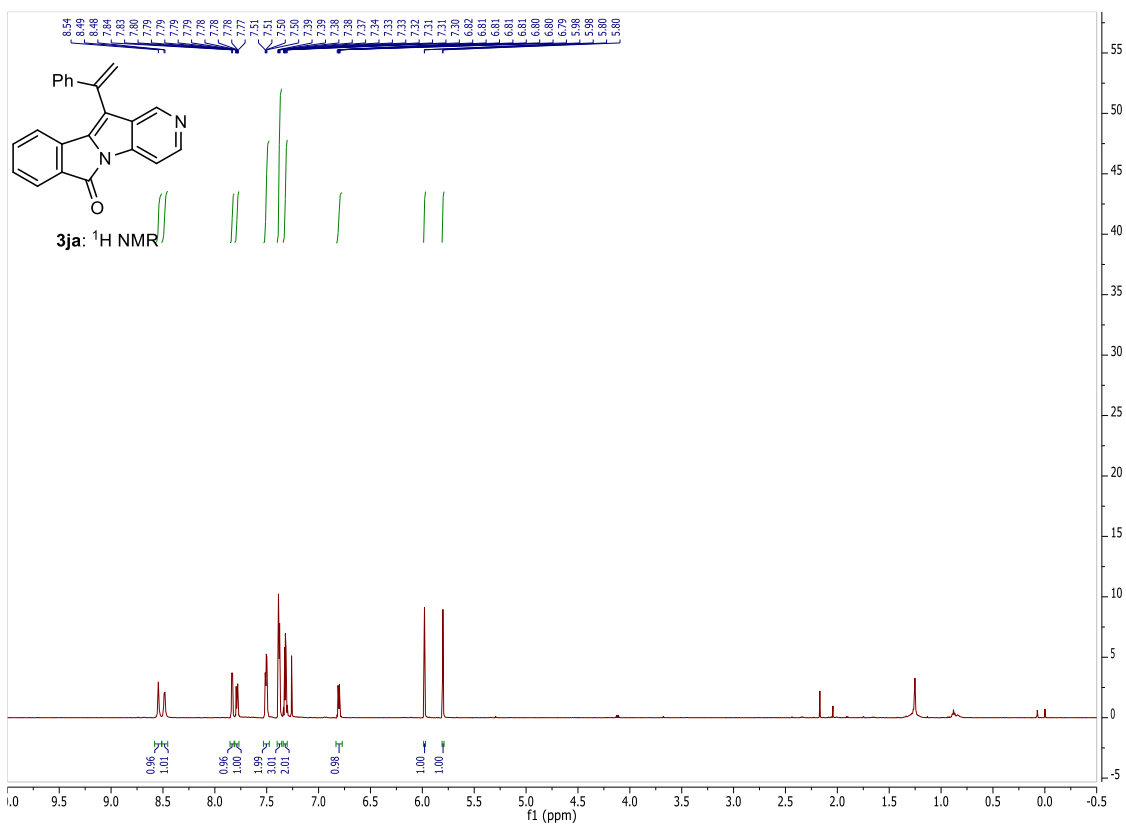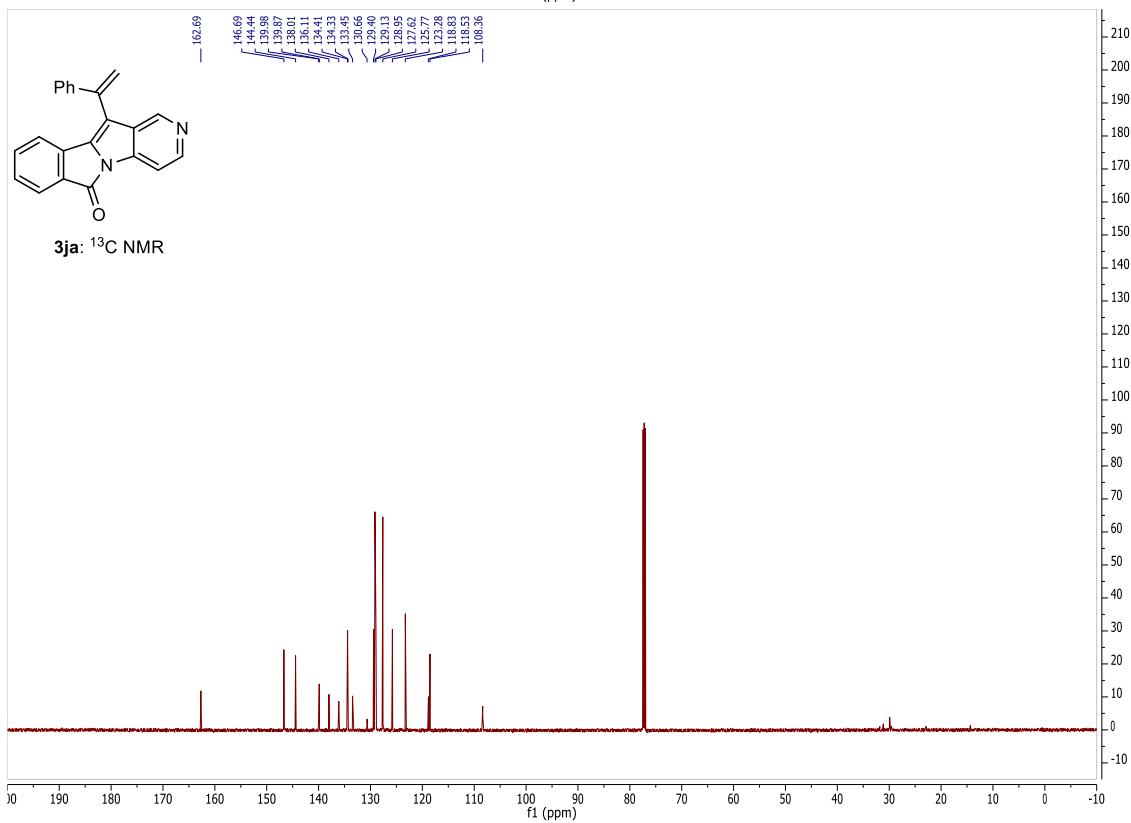

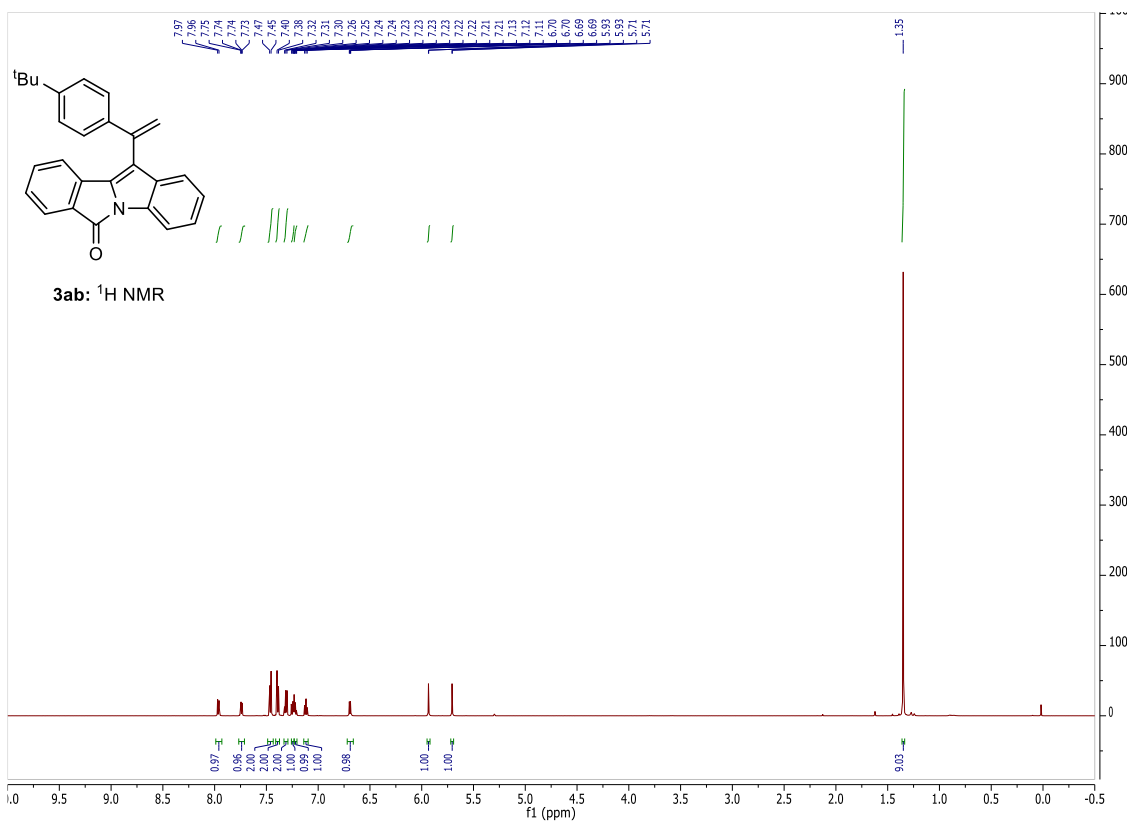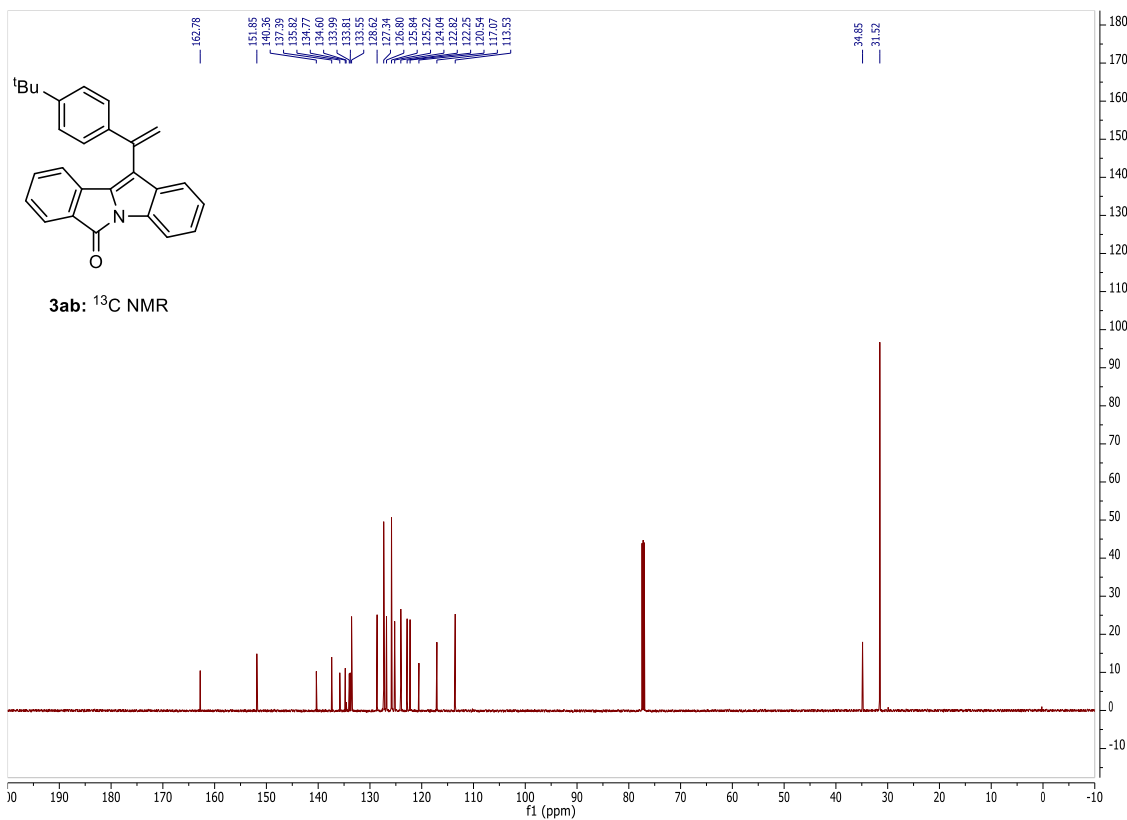

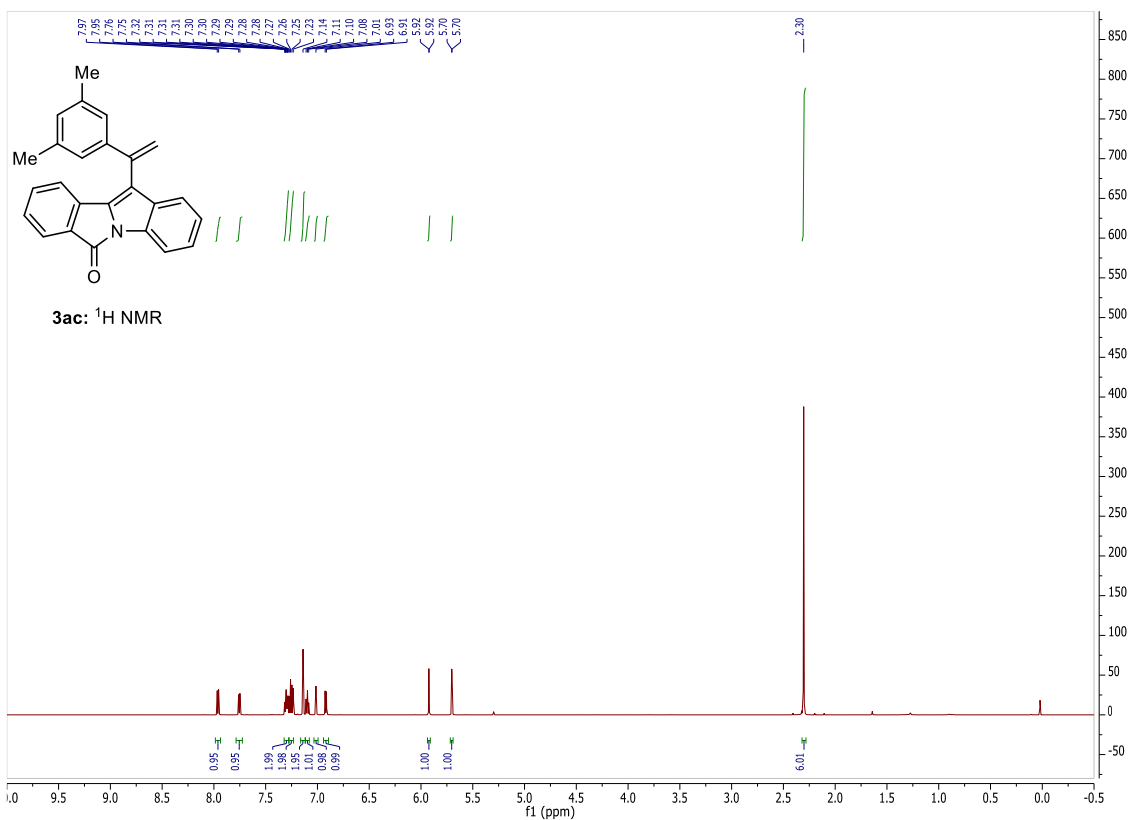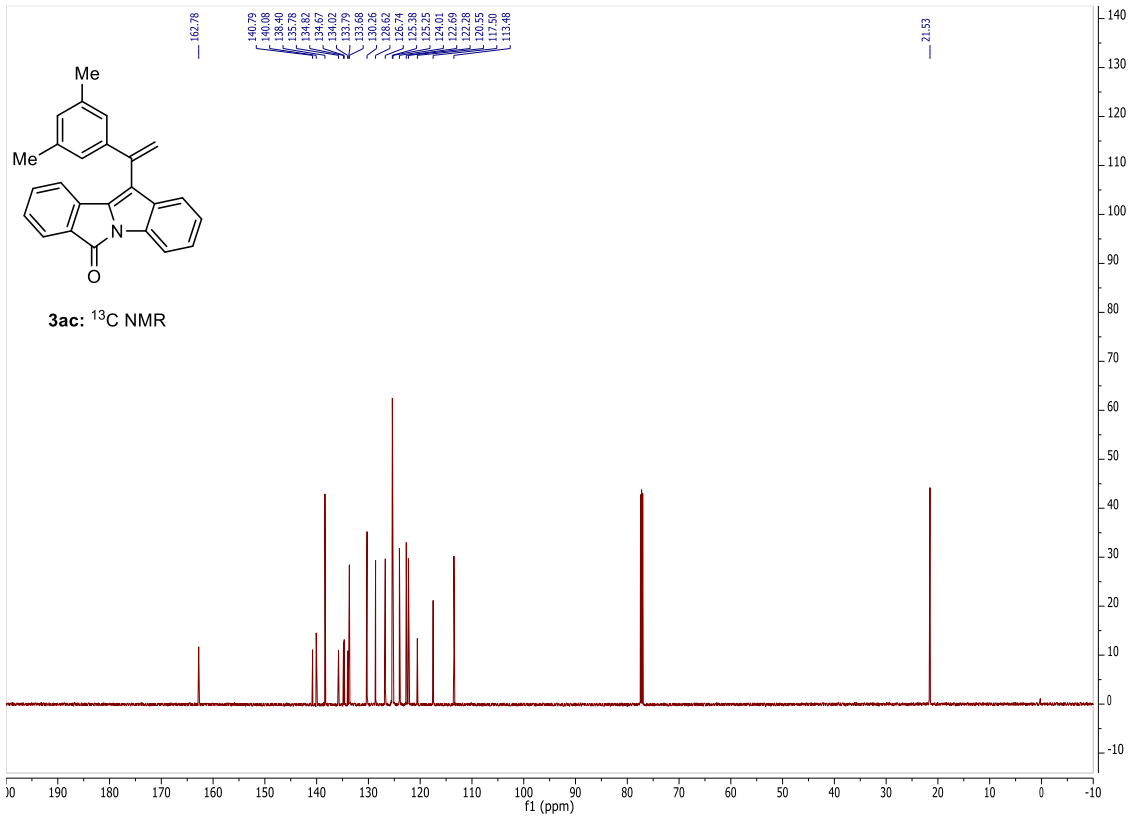

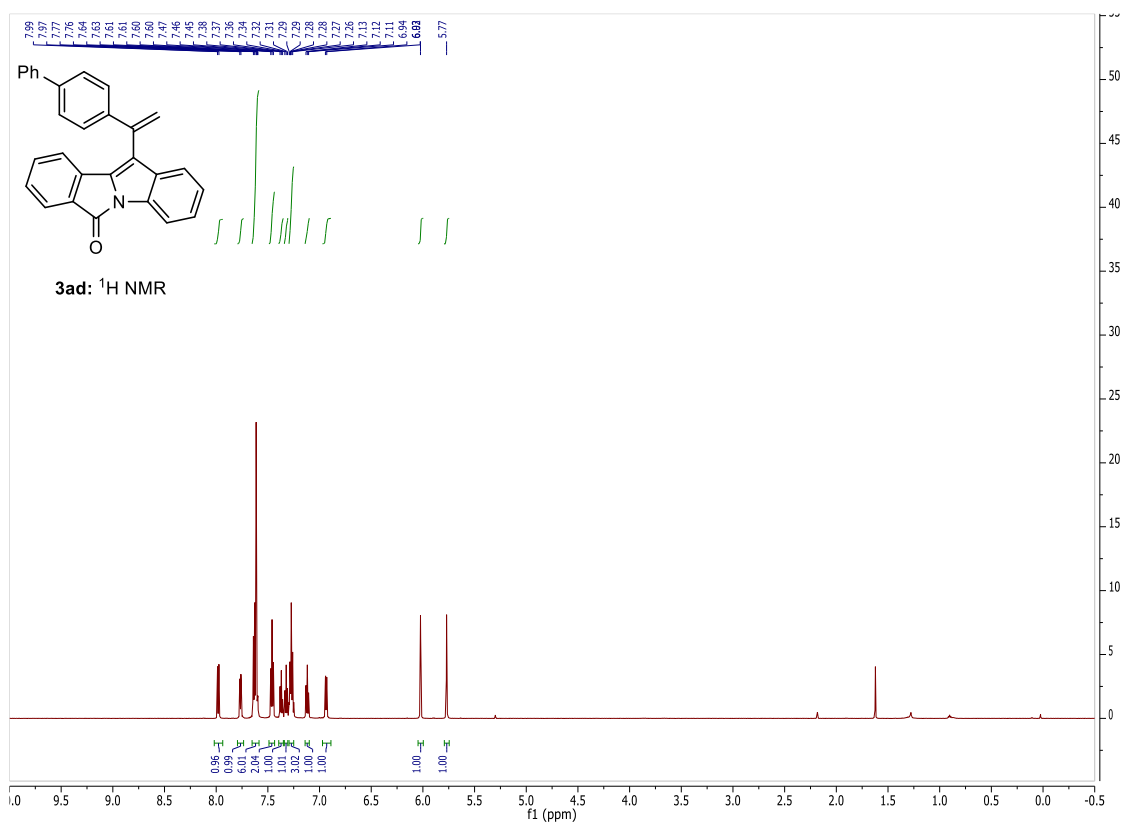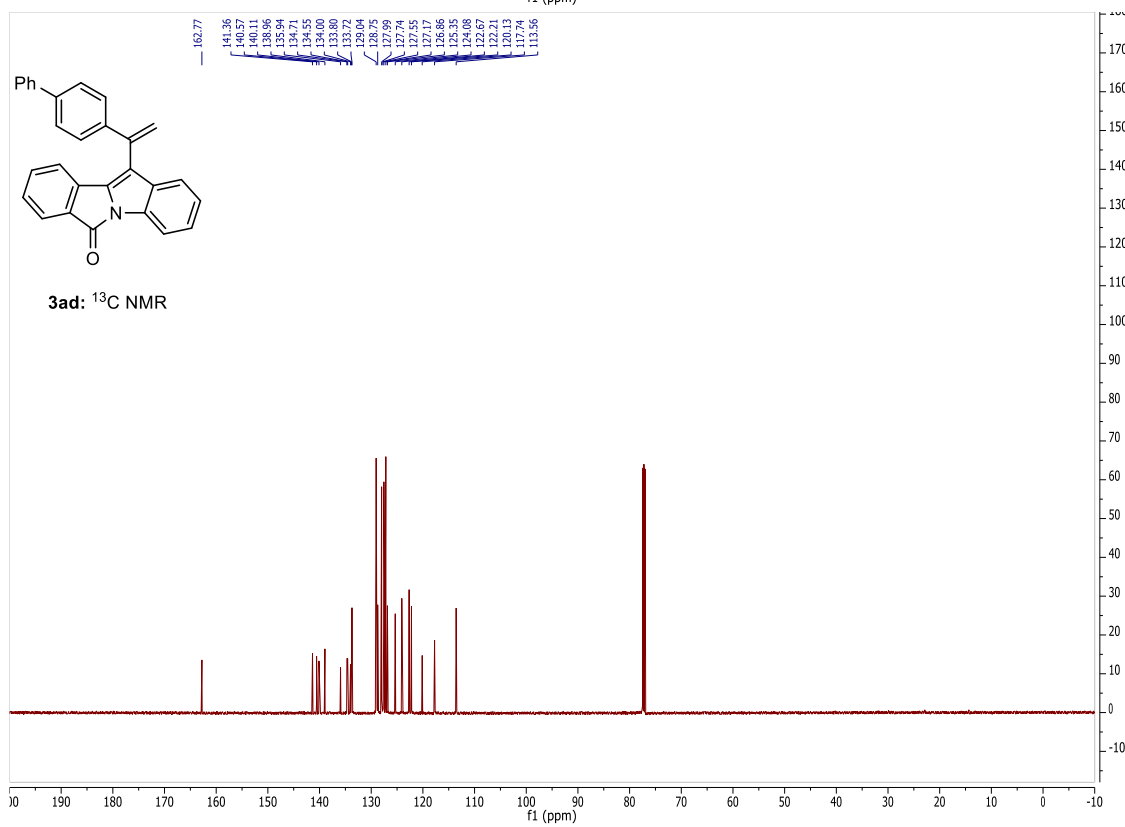

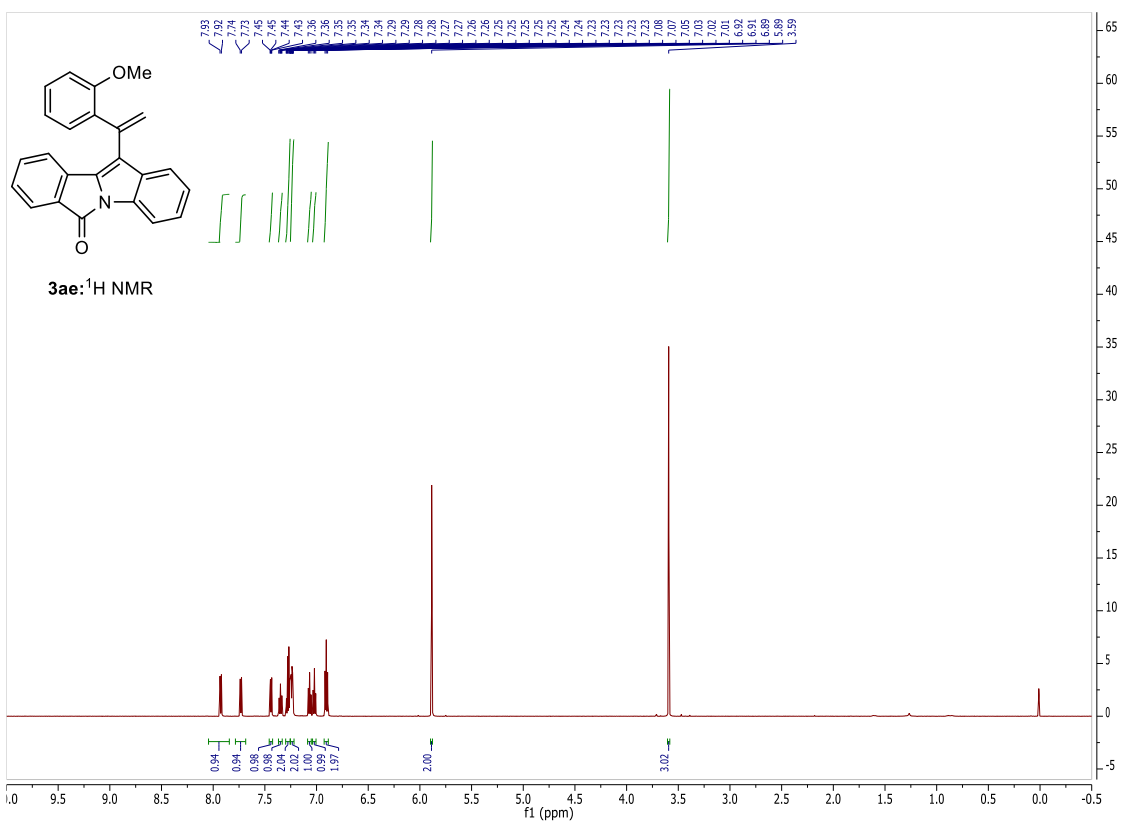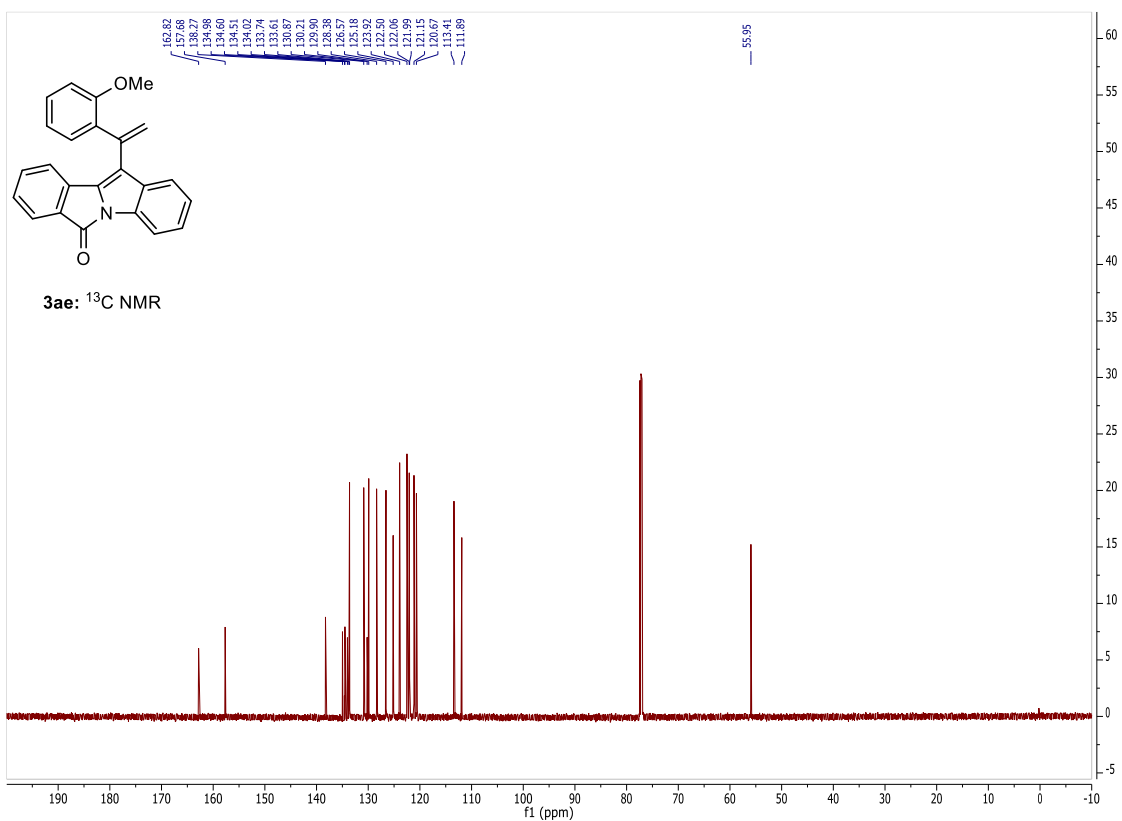

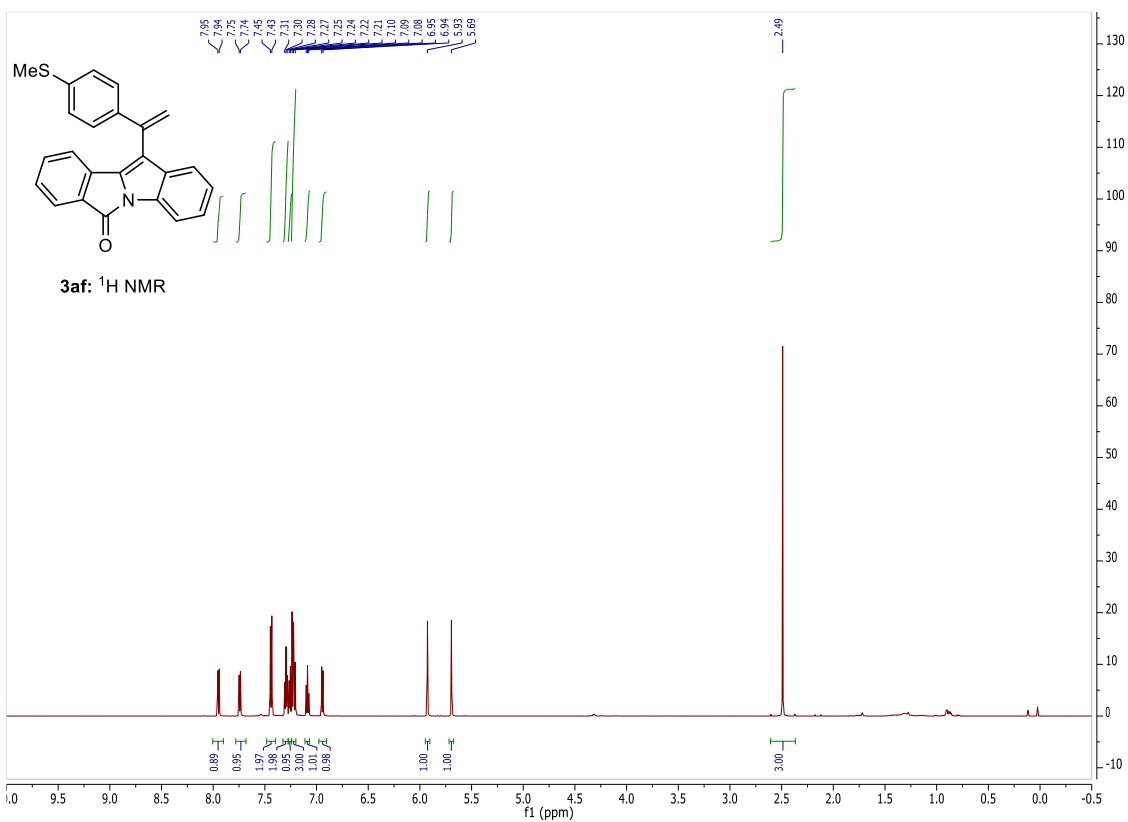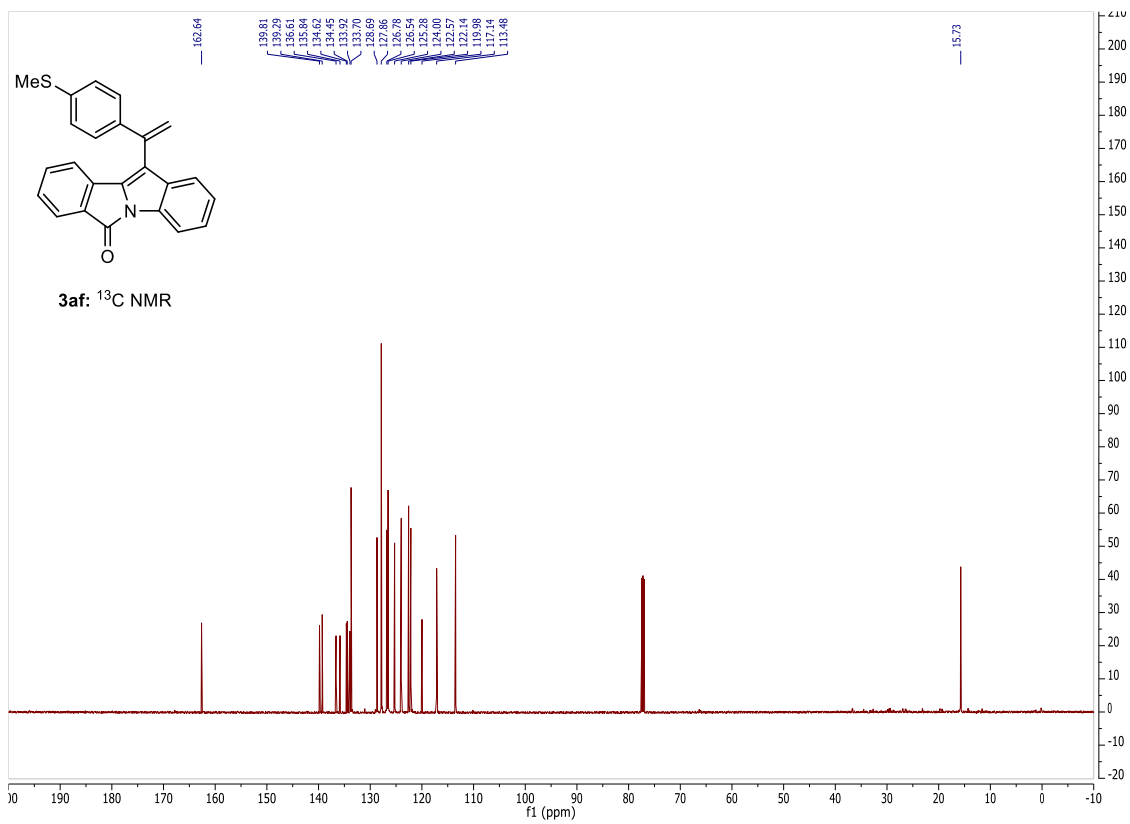

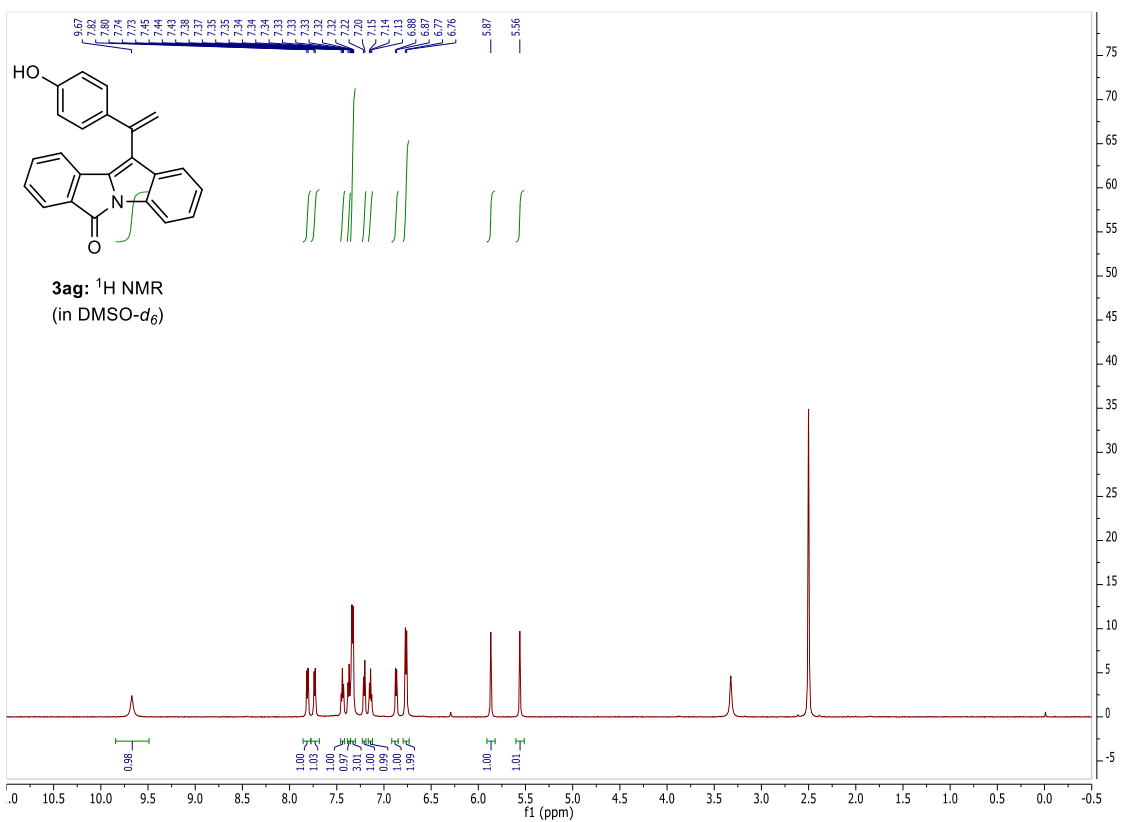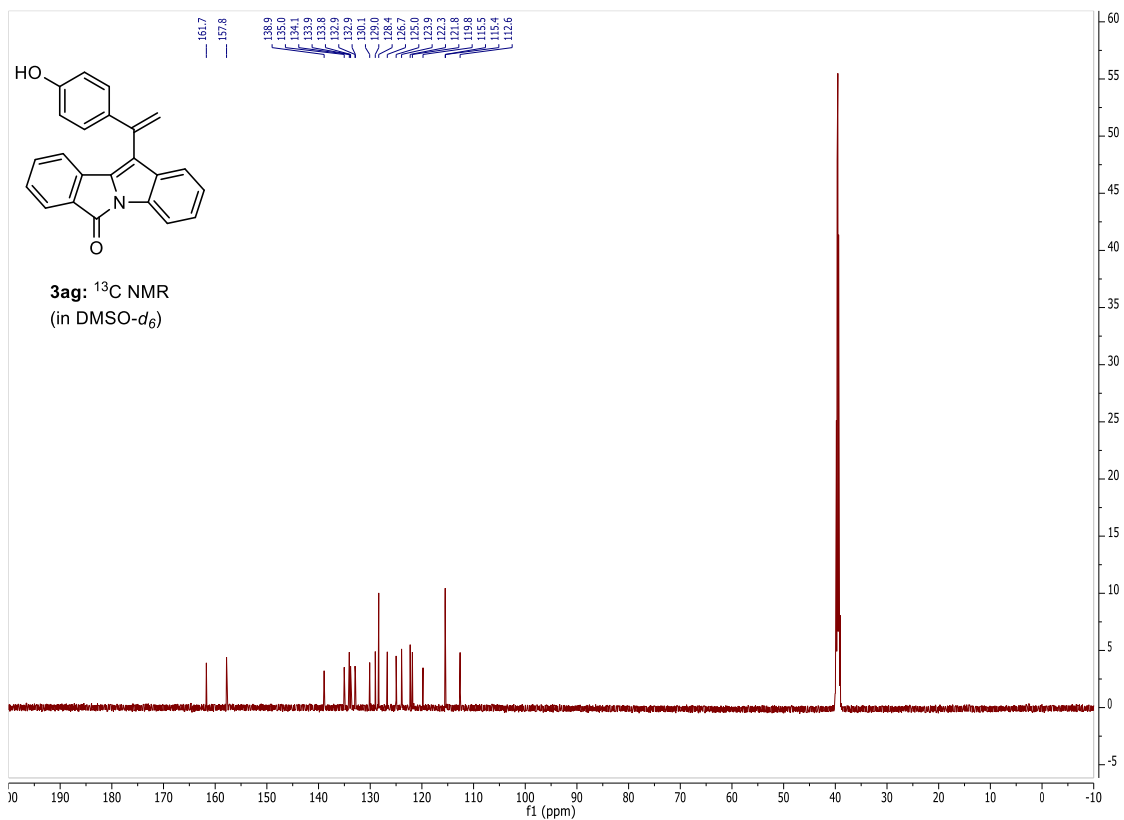



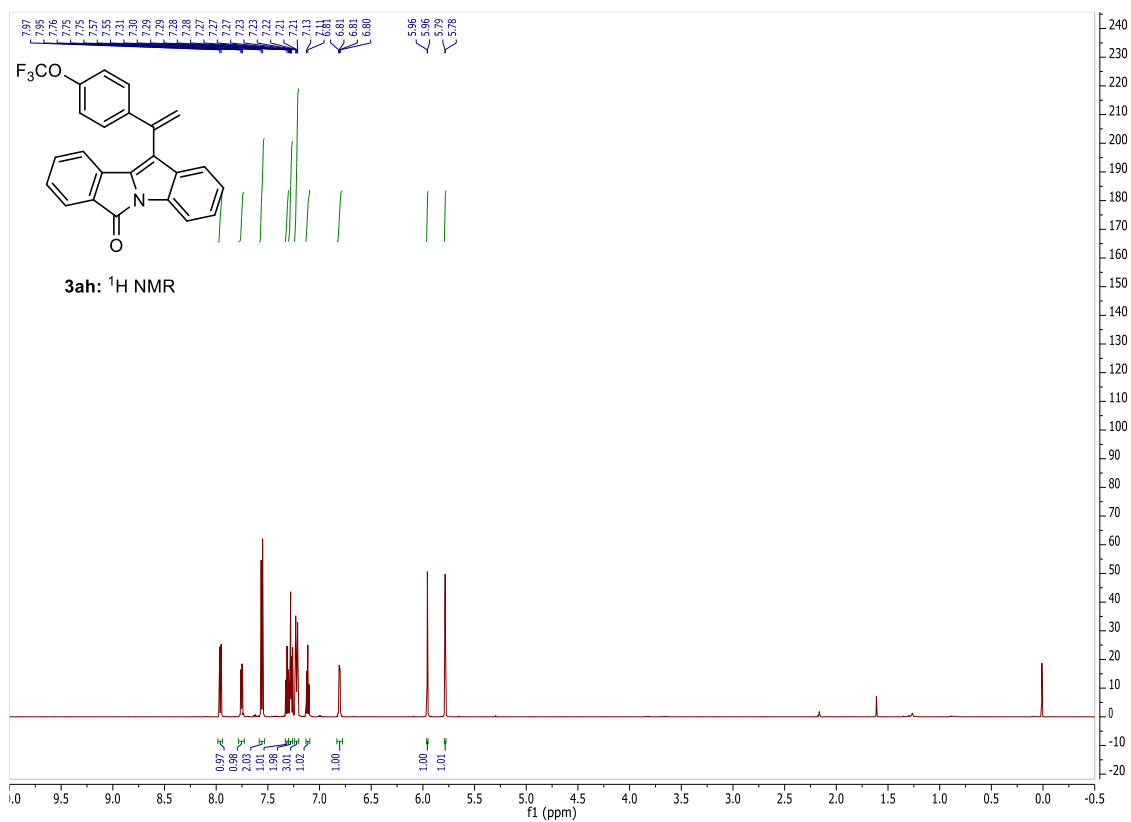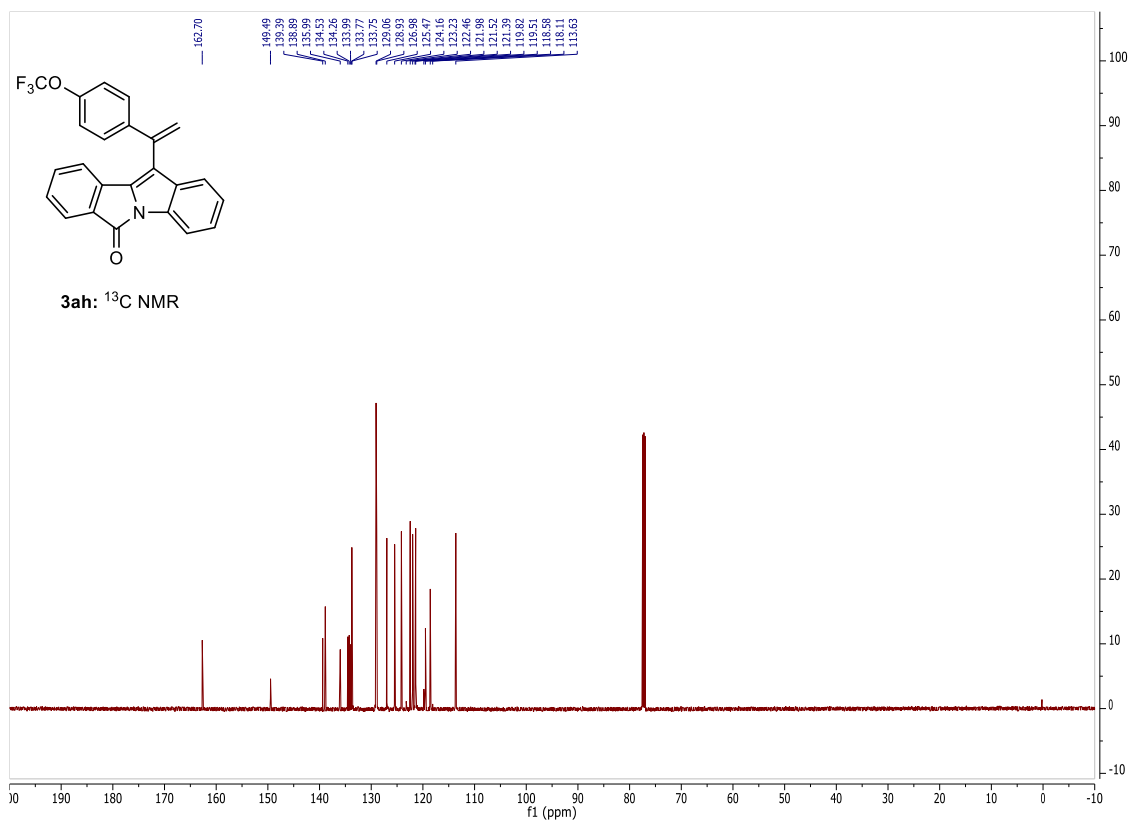

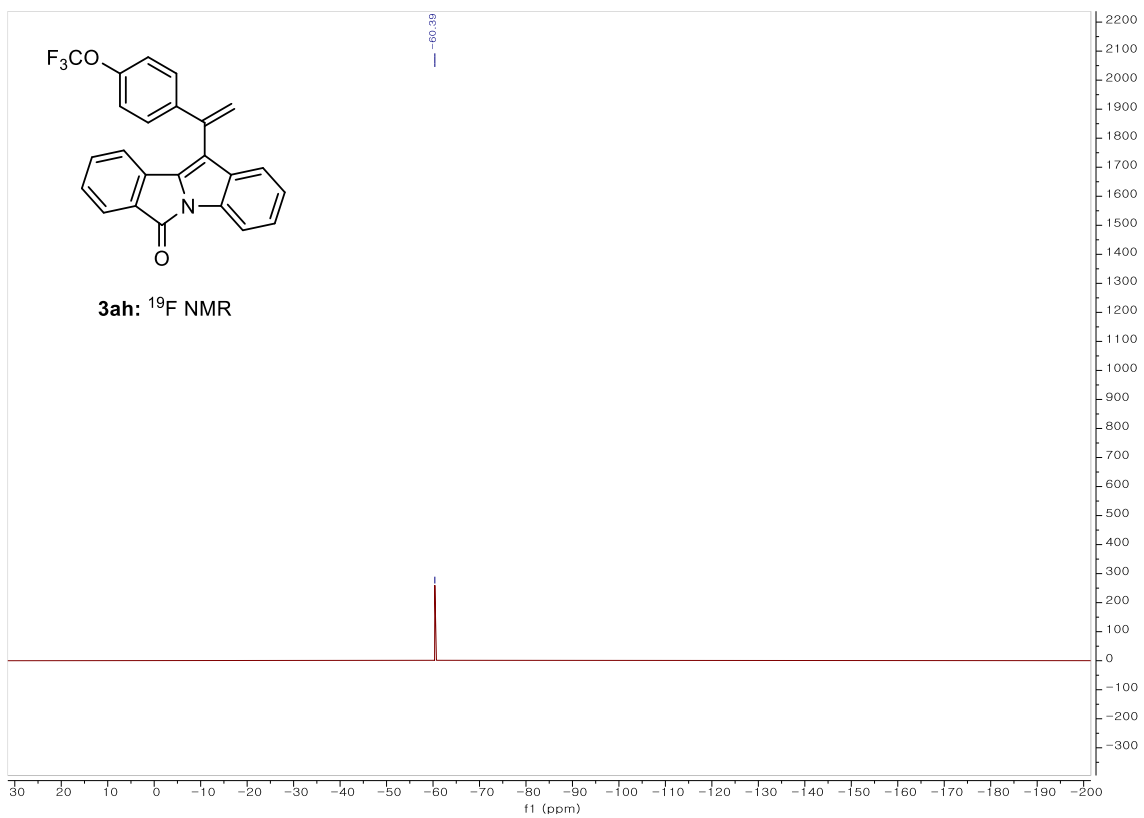

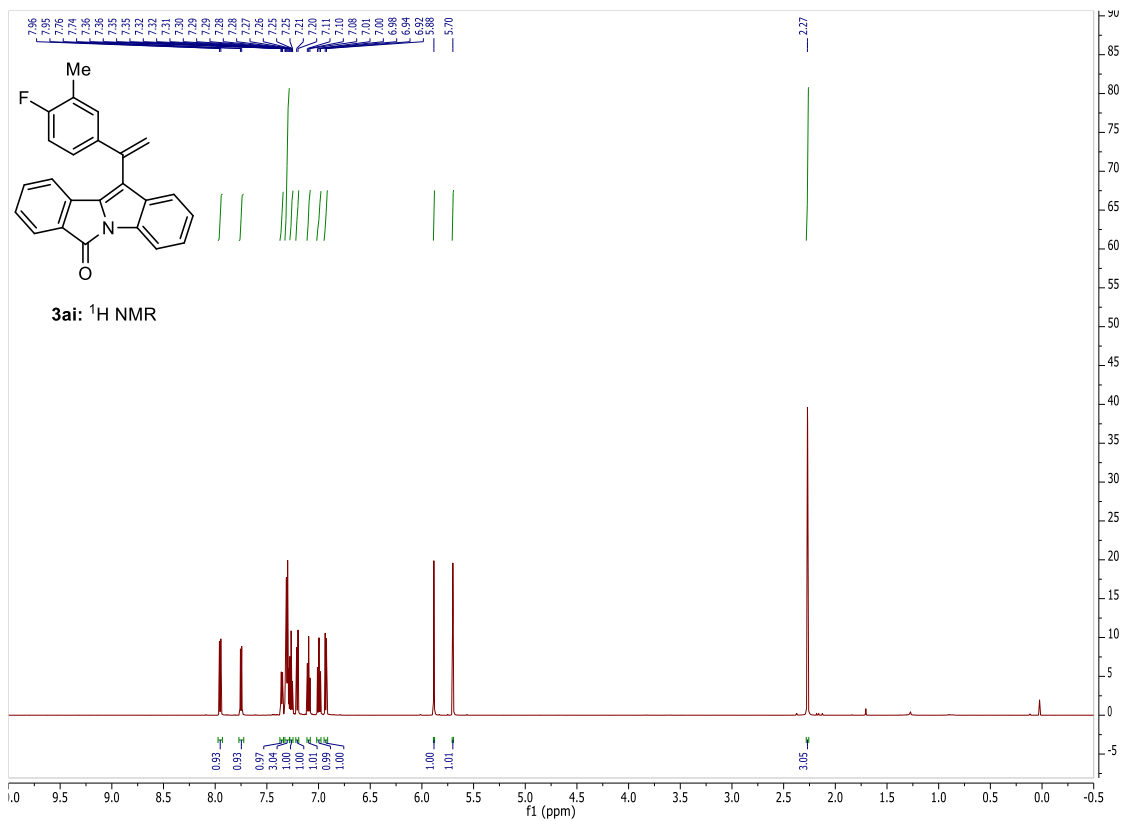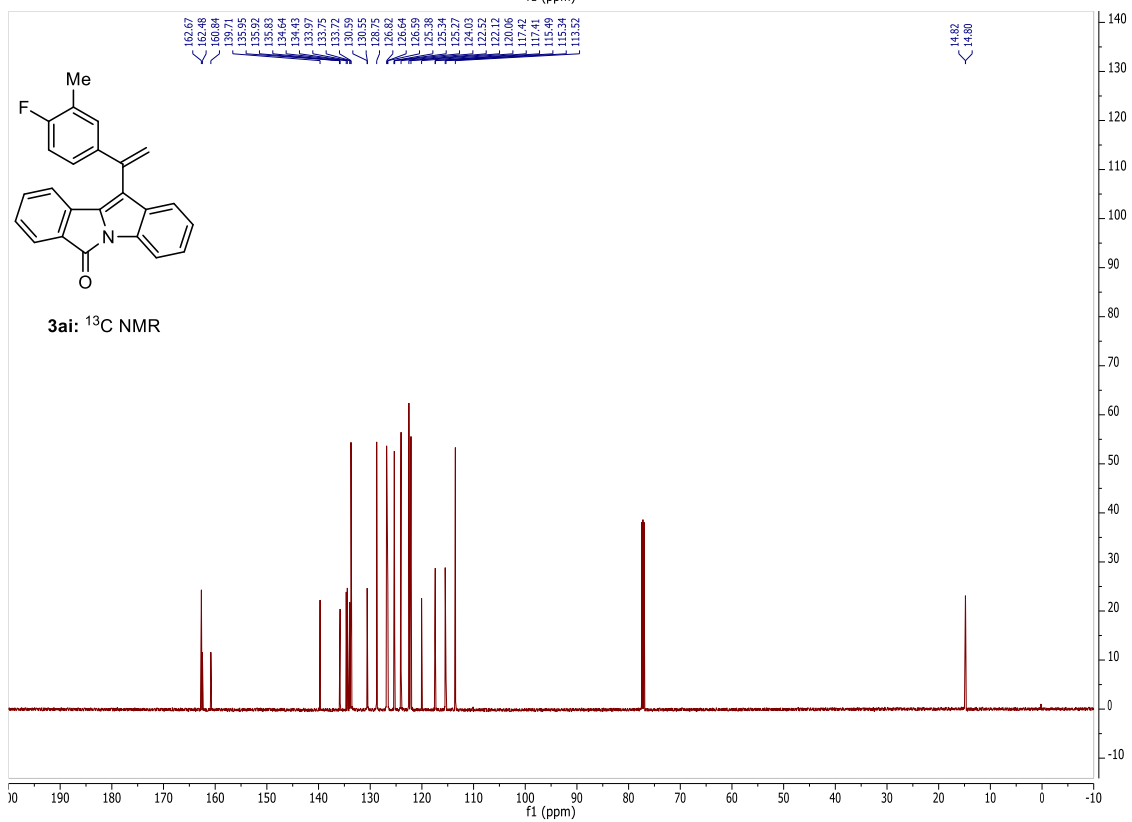

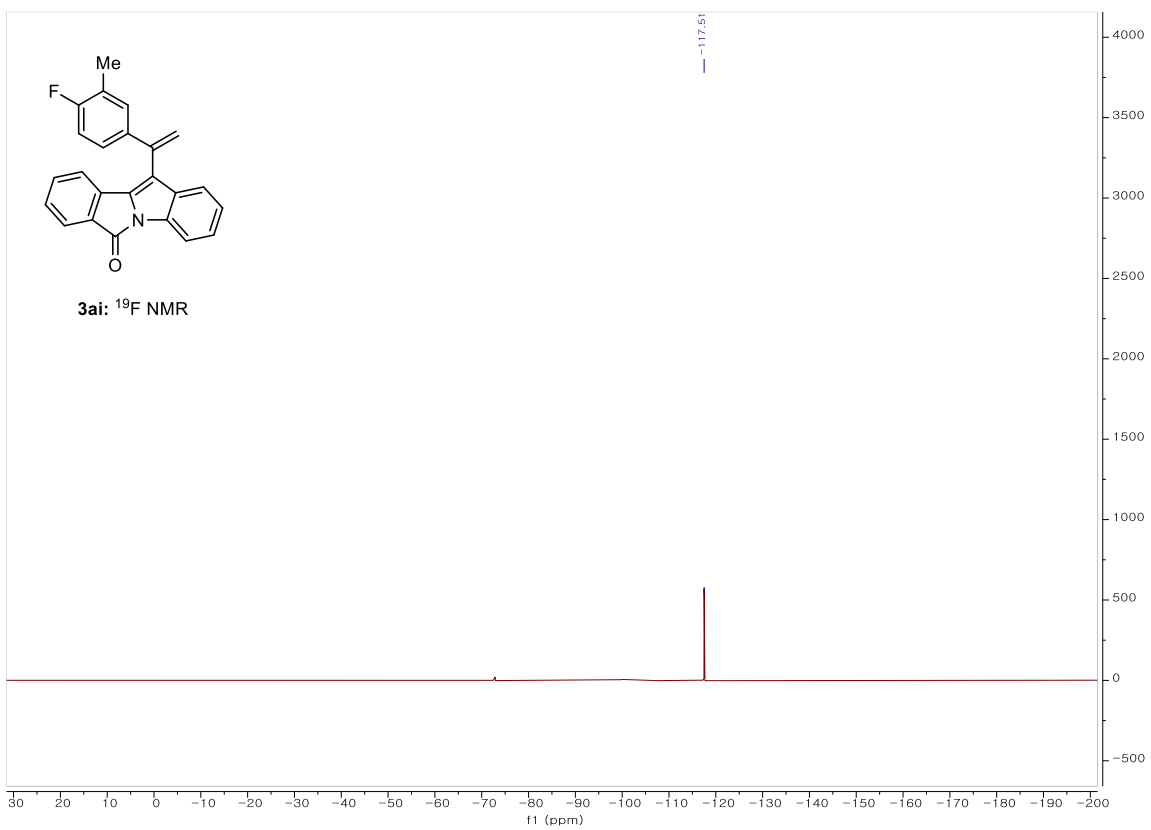

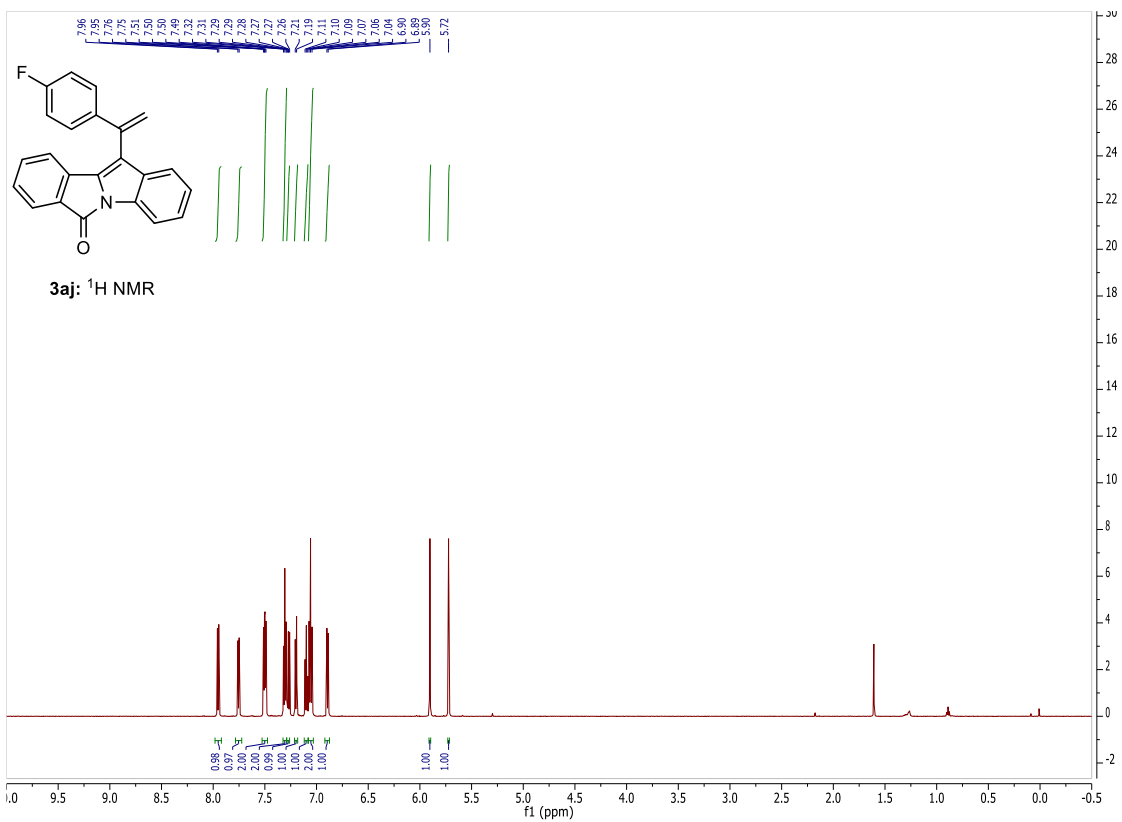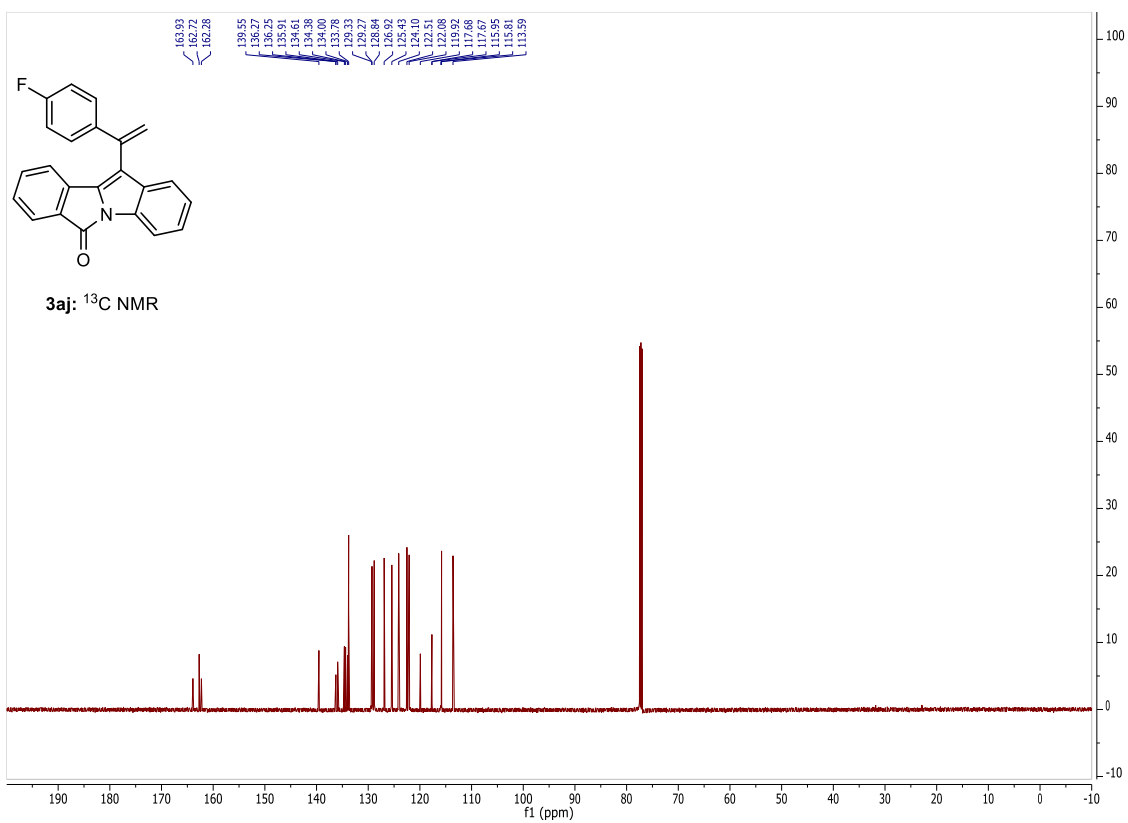

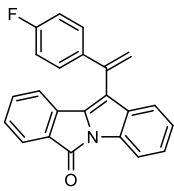

3aj:  $^{19}\text{F}$  NMR

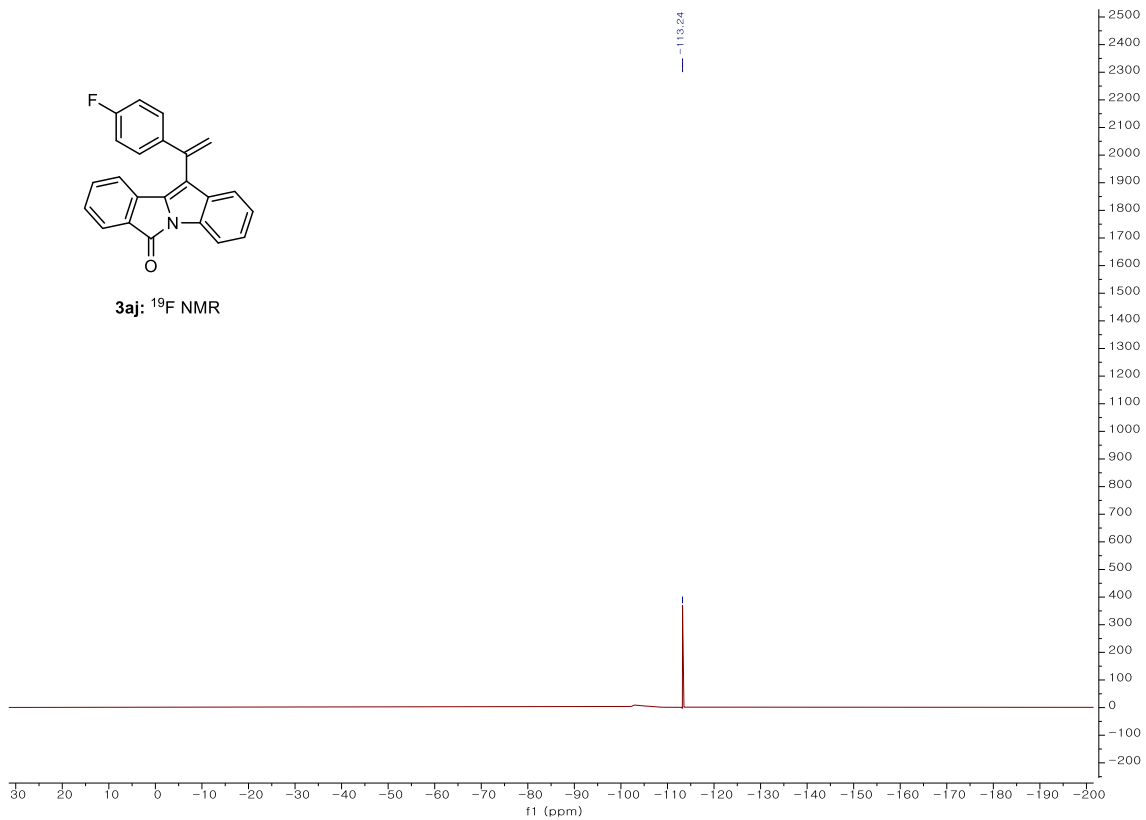

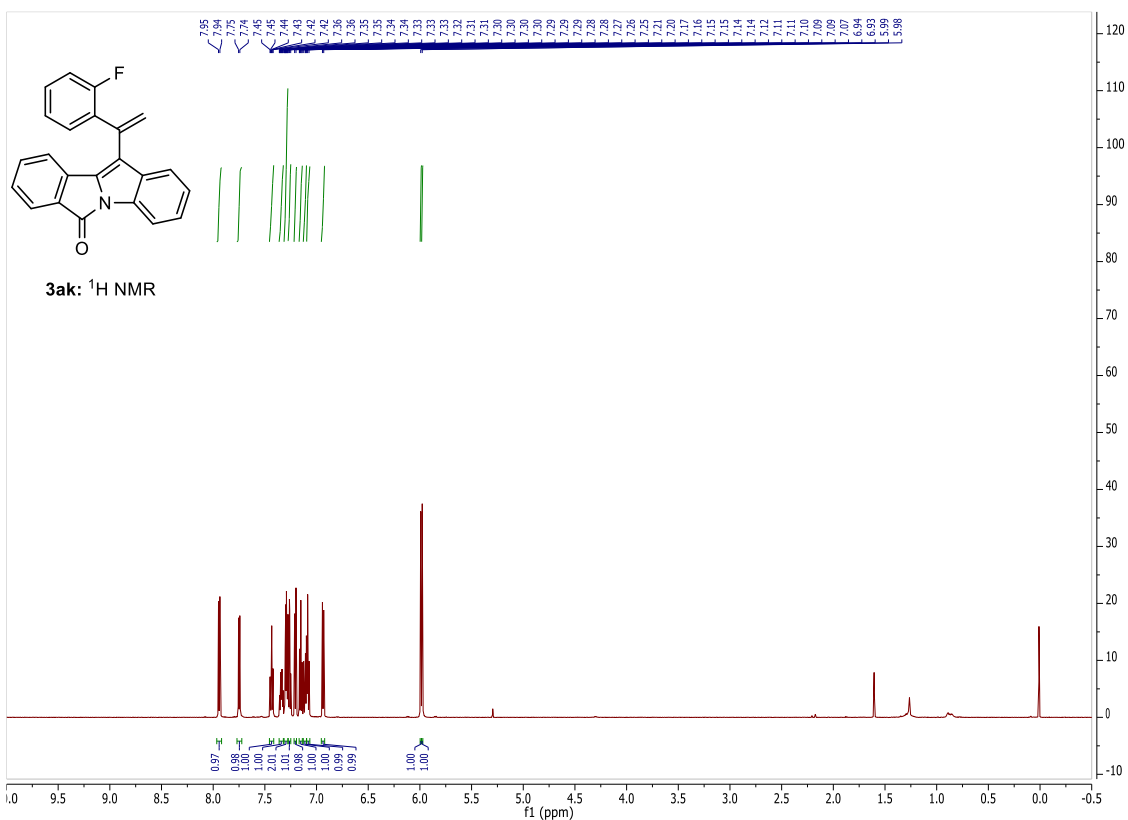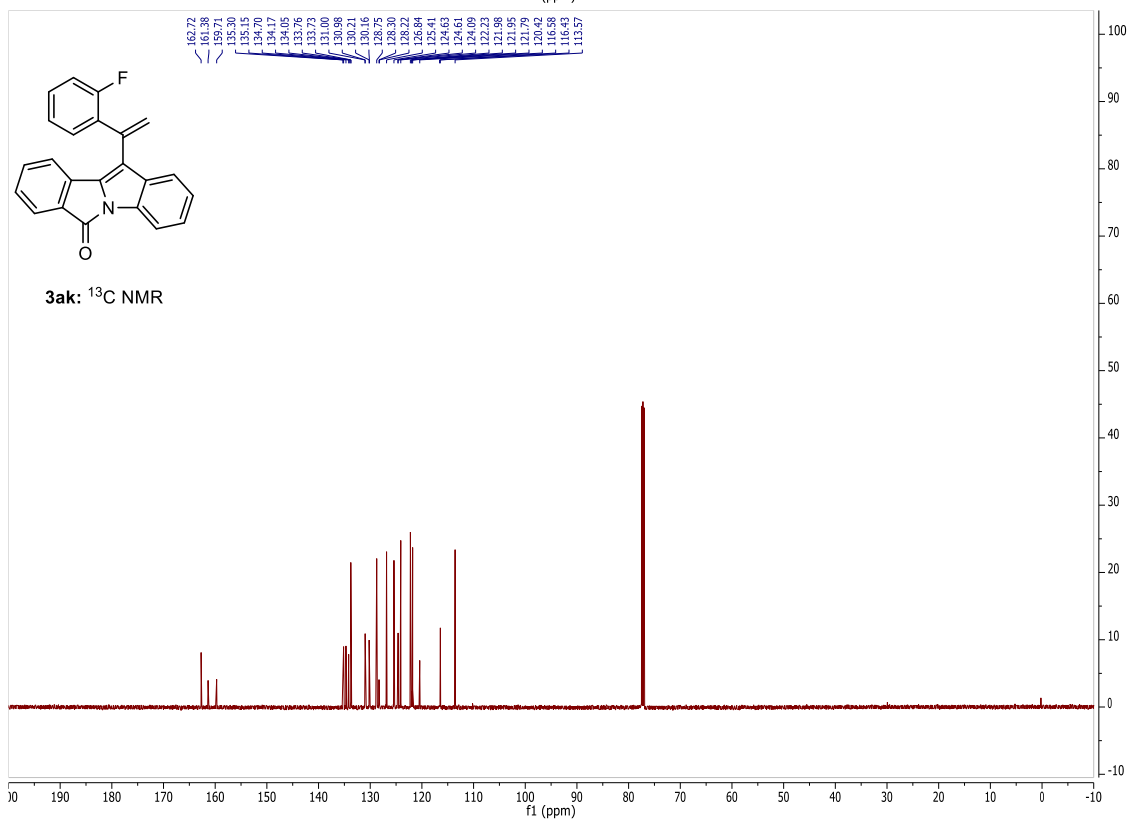

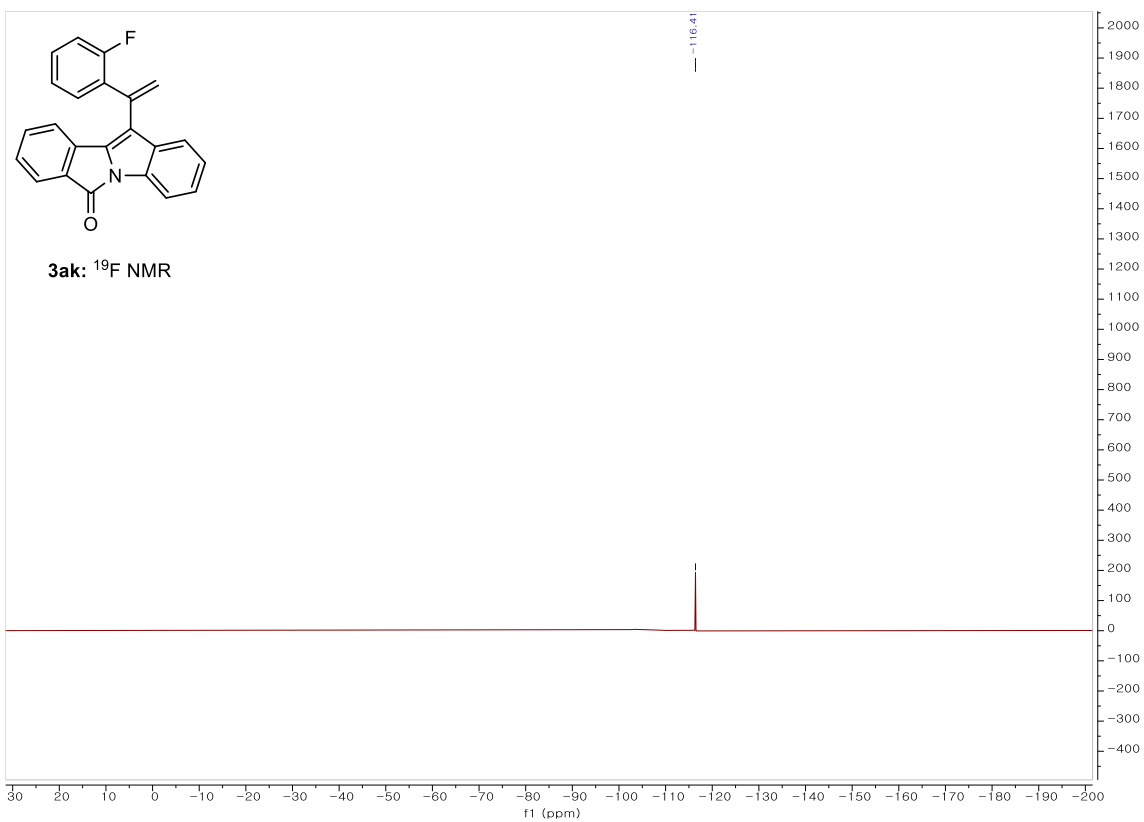



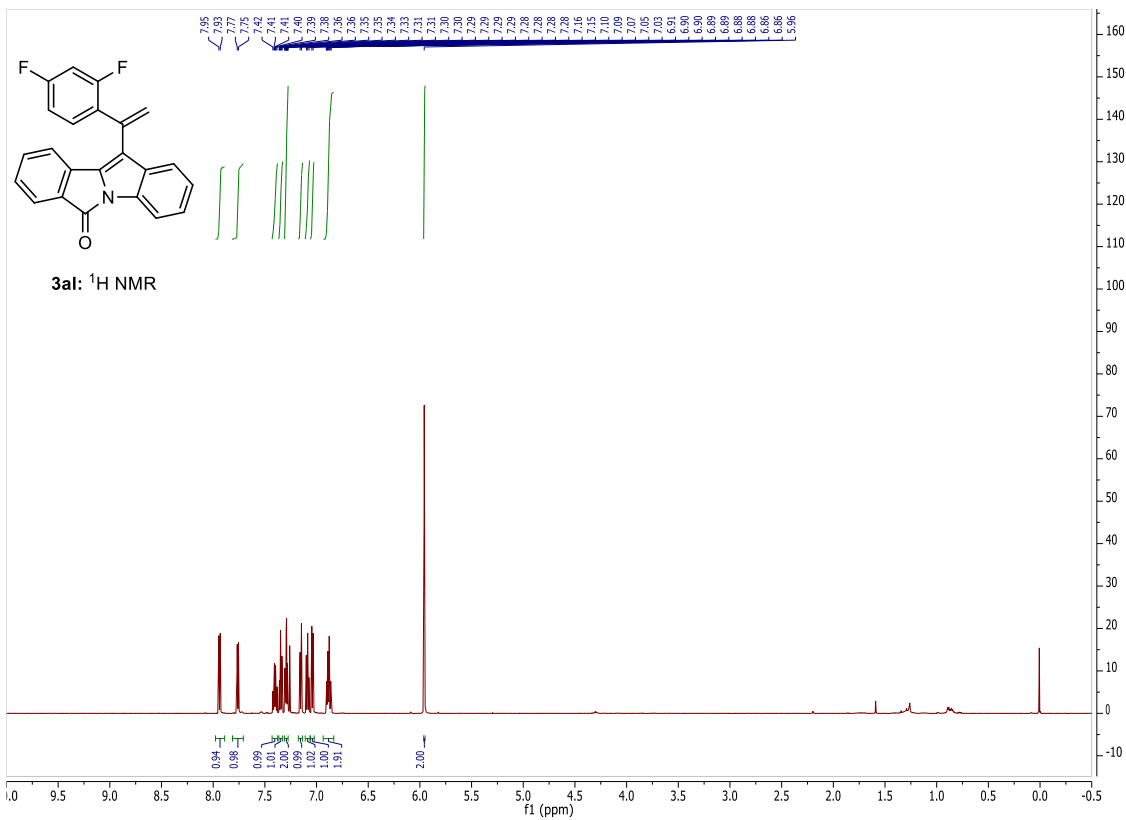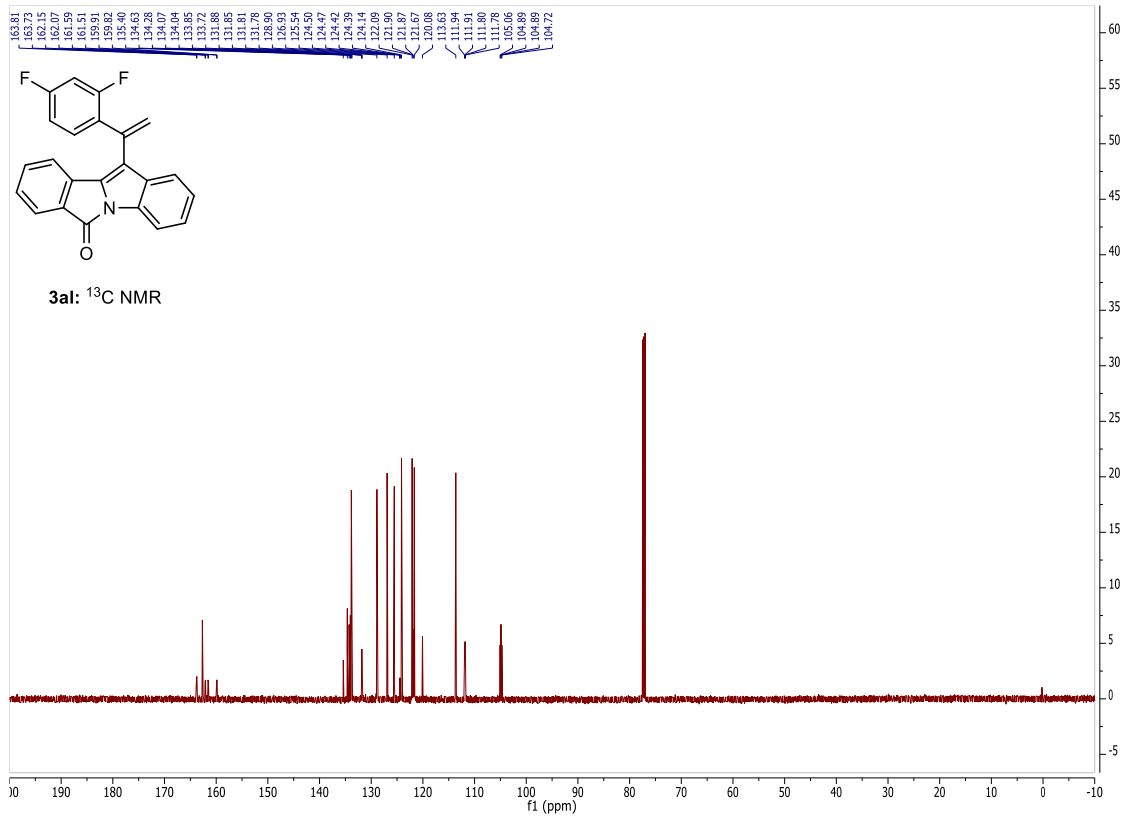

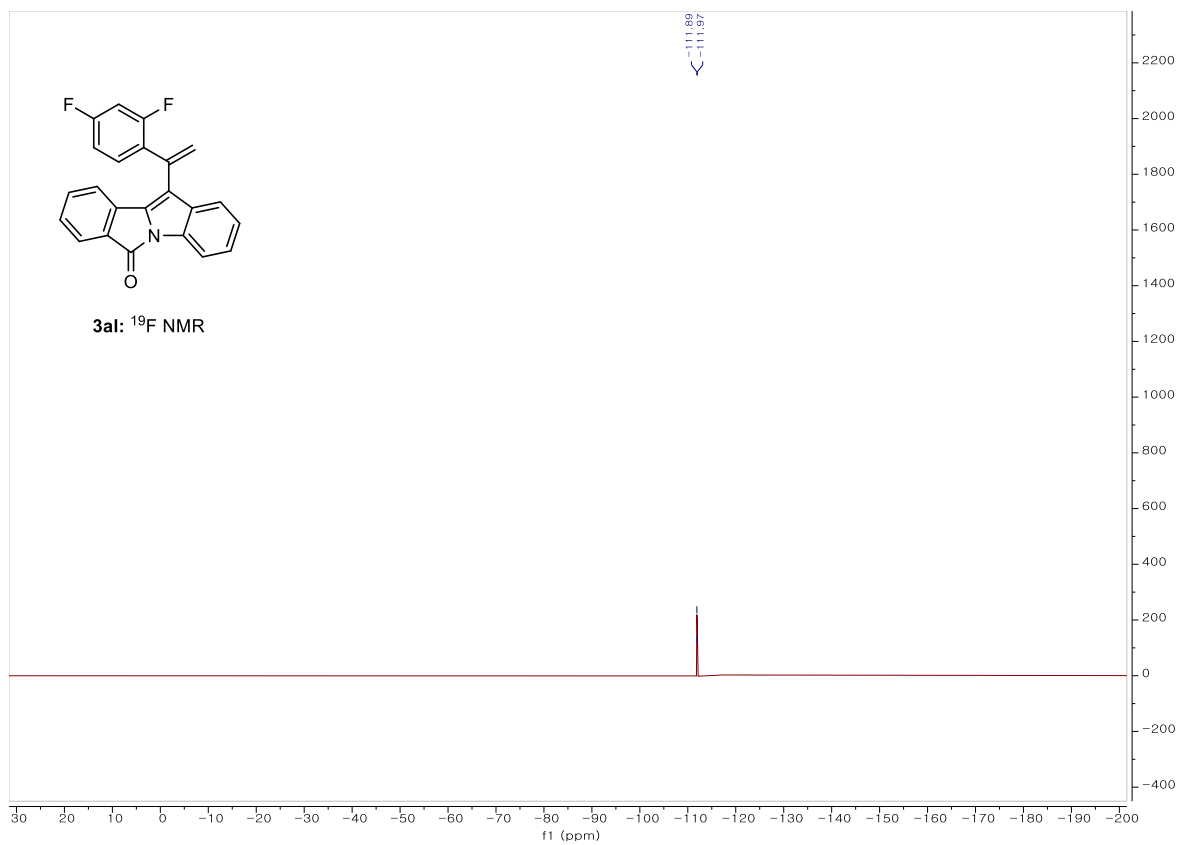

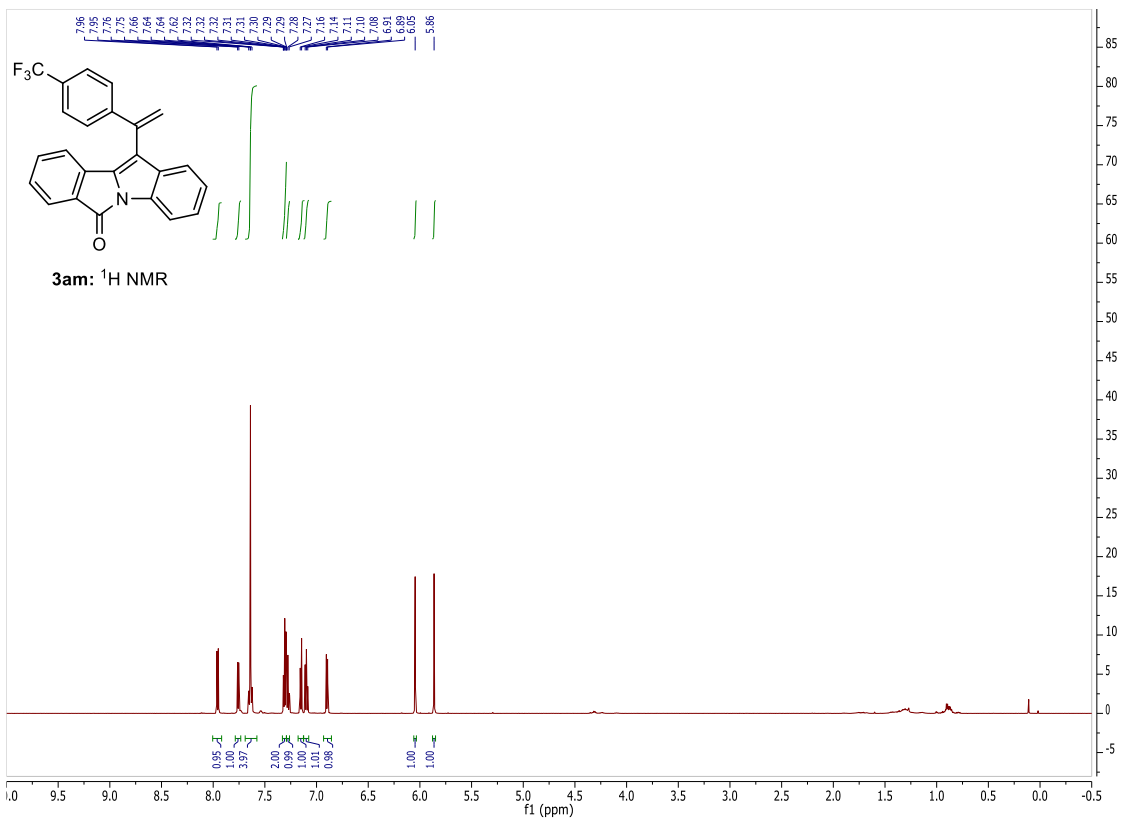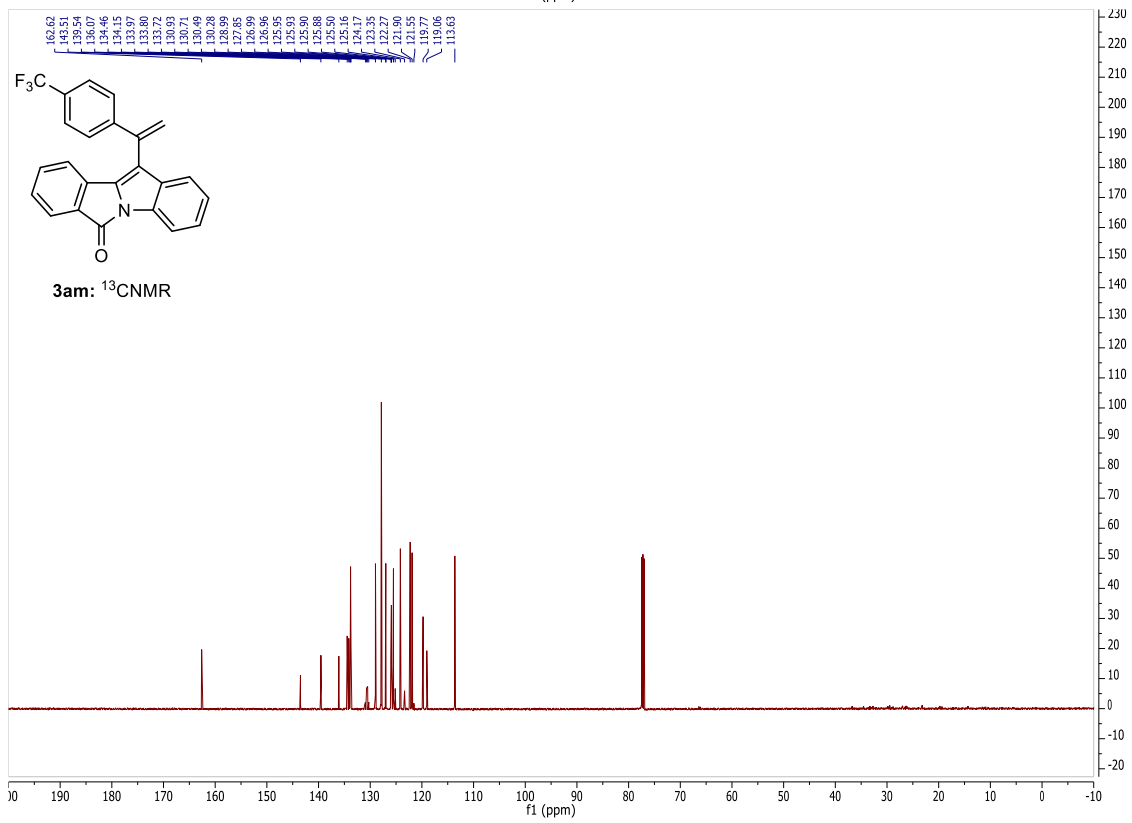

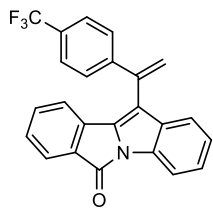

**3am:**  $^{19}\text{F}$  NMR

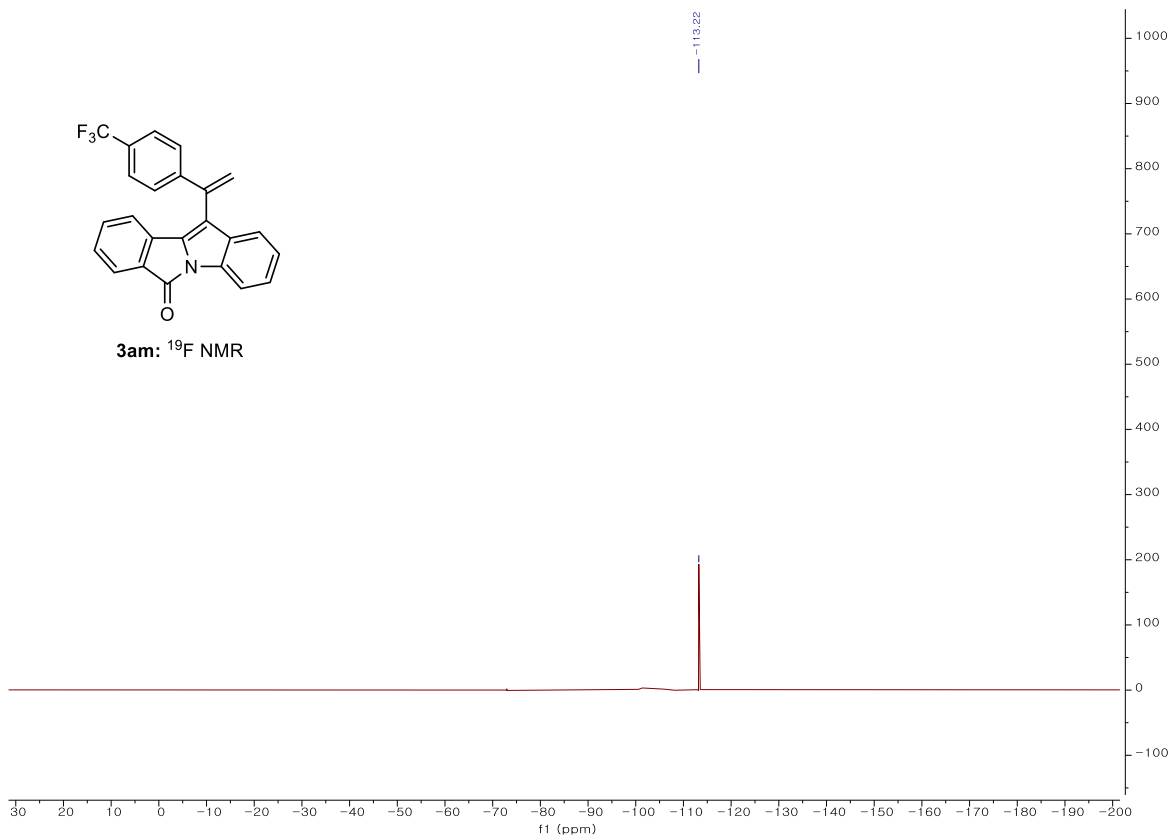

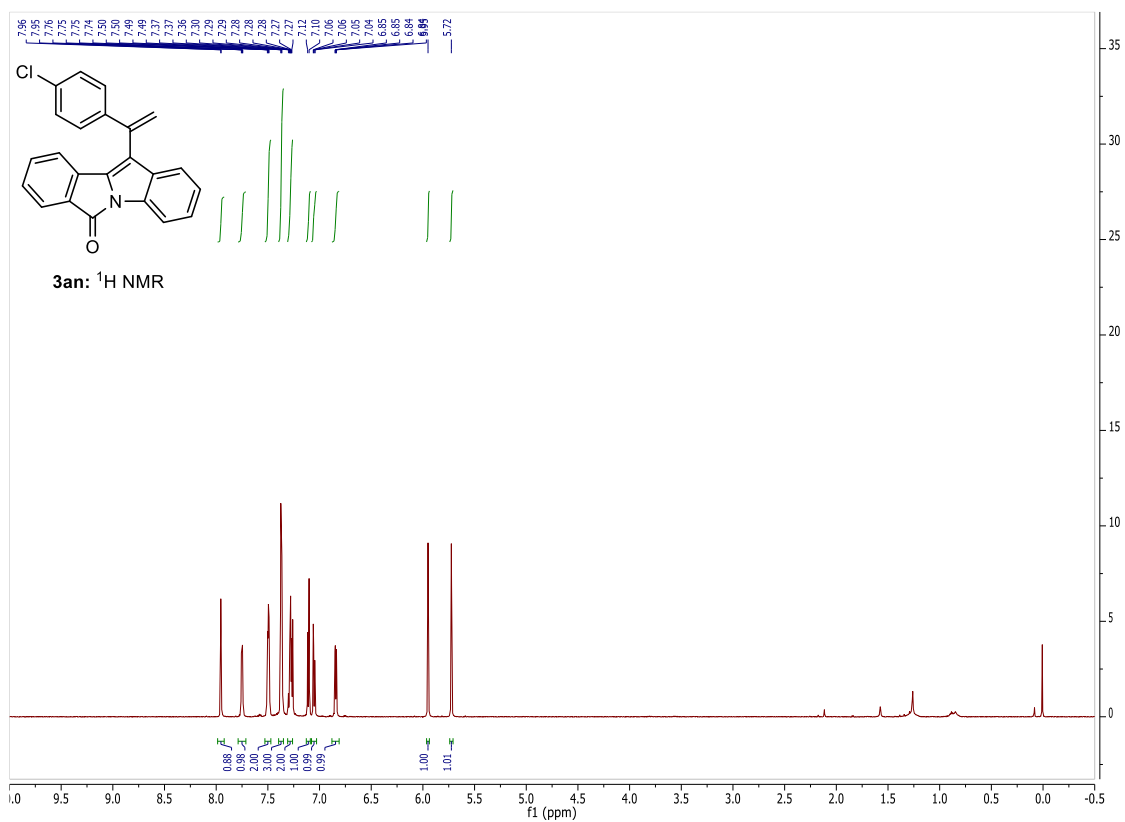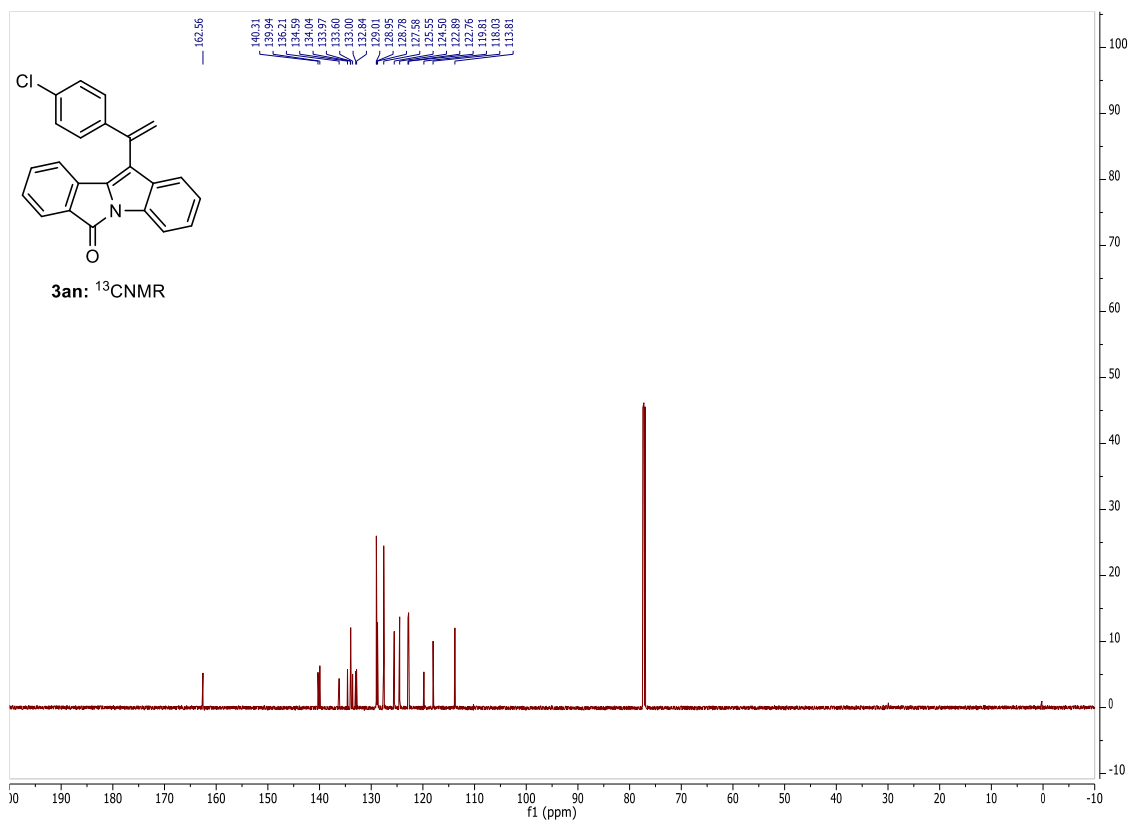

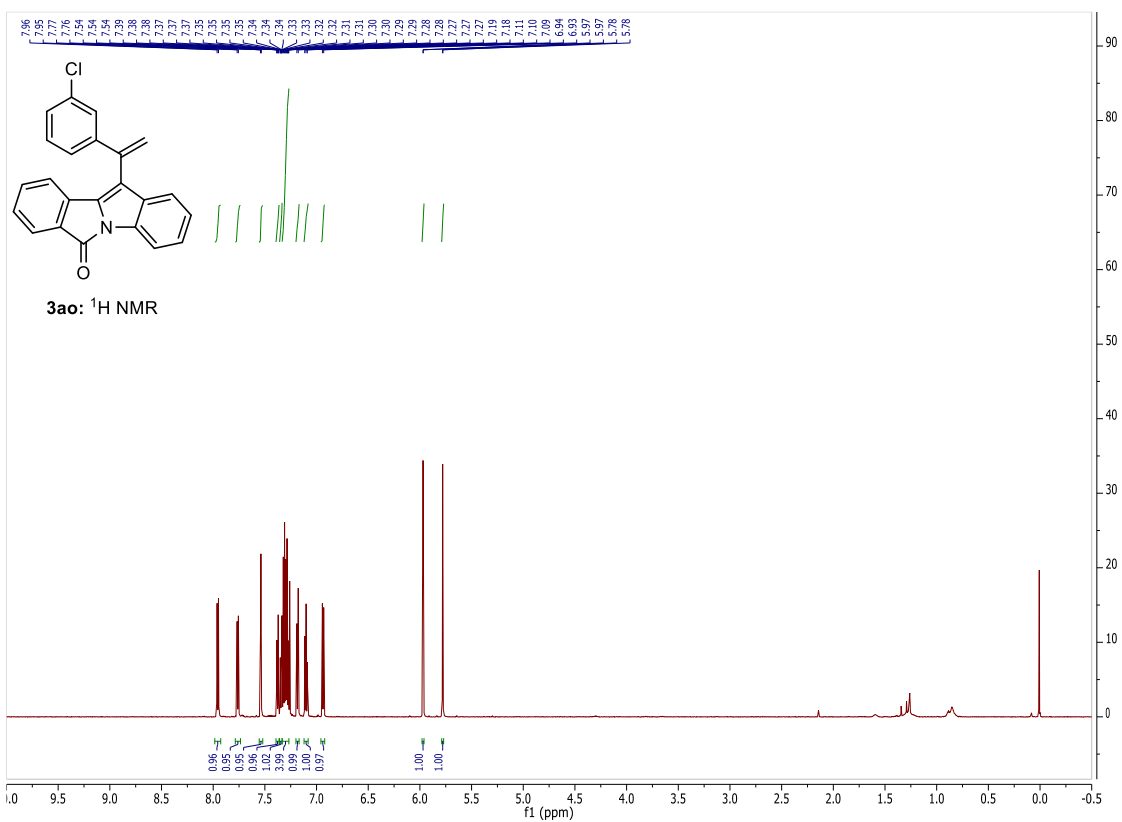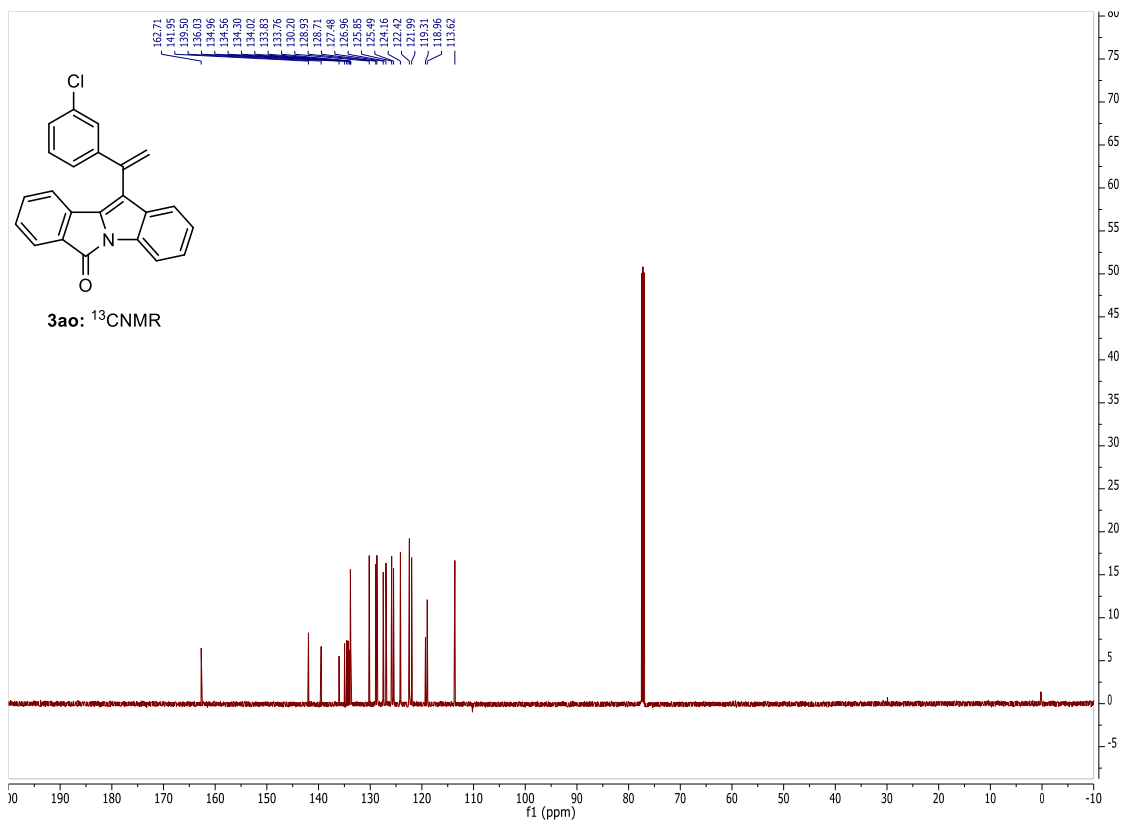

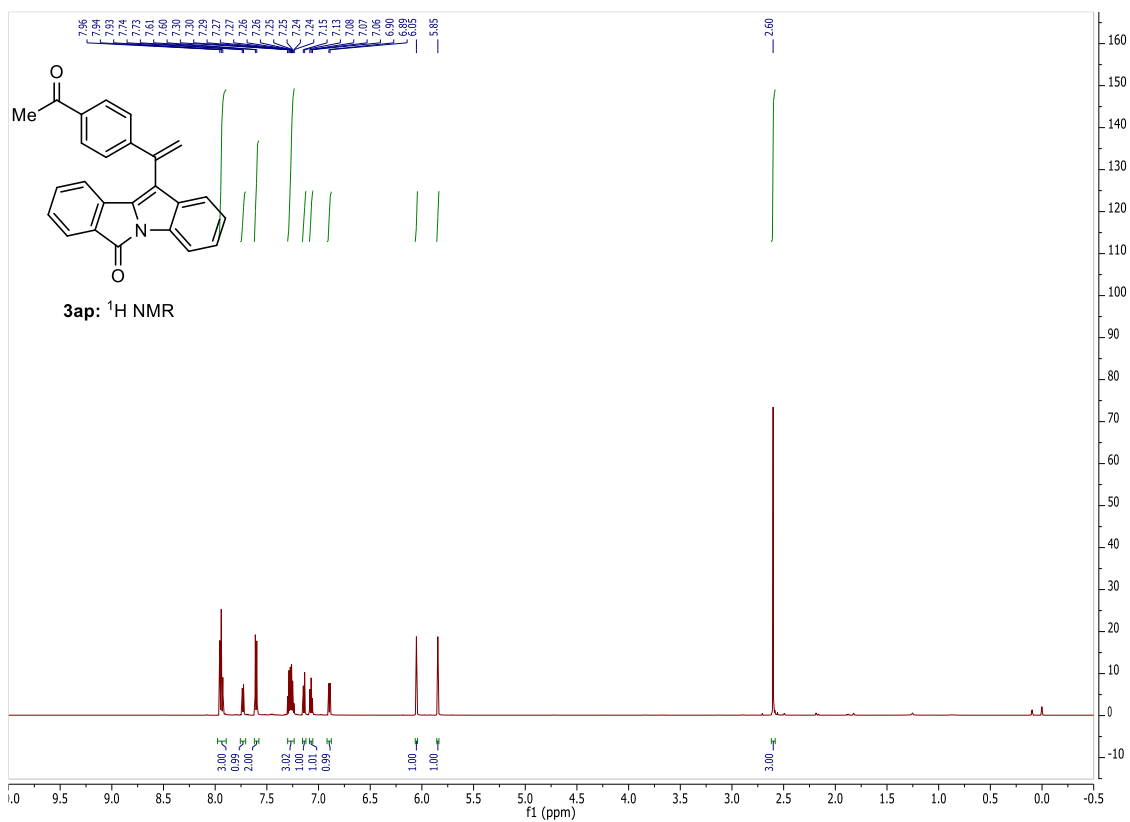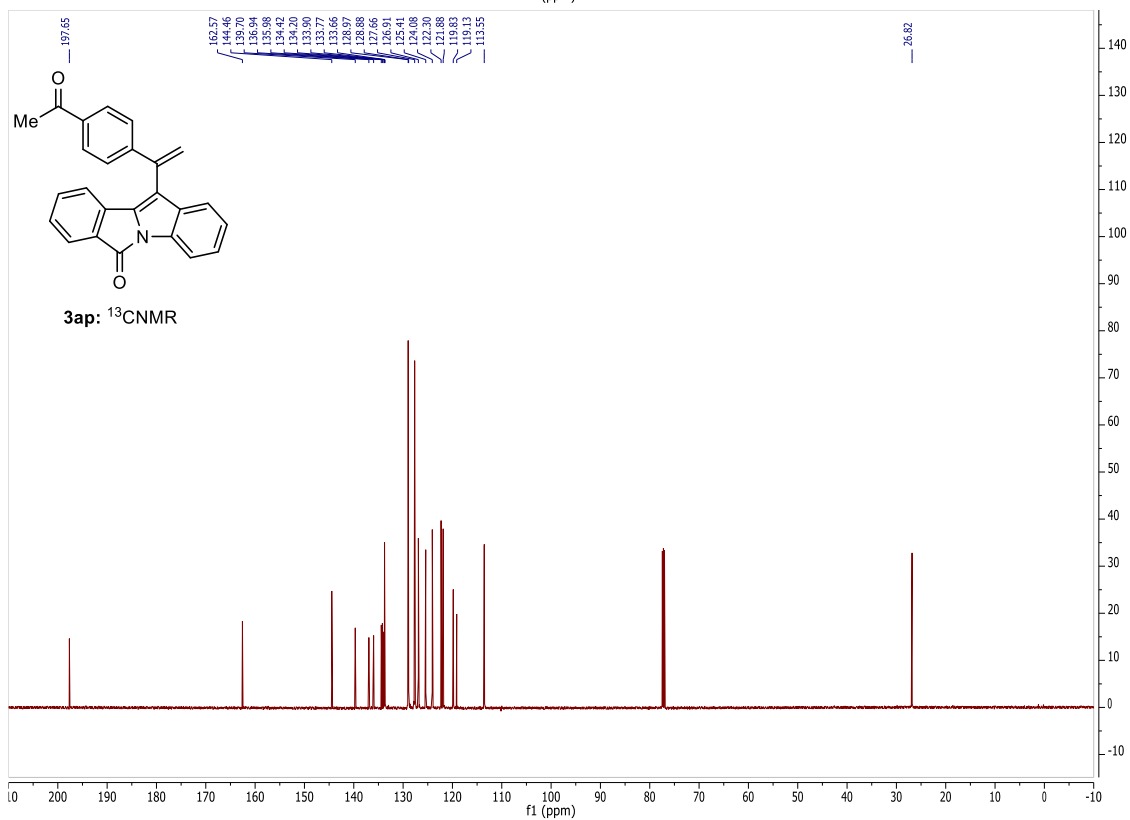

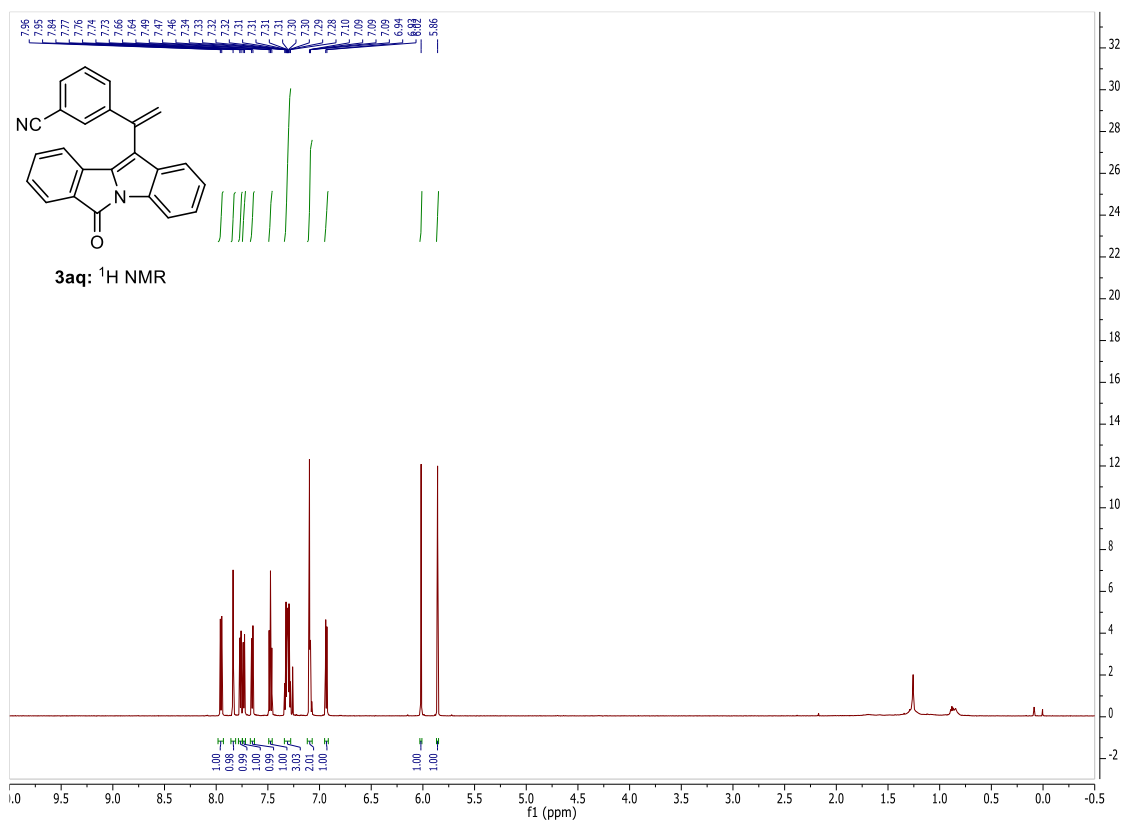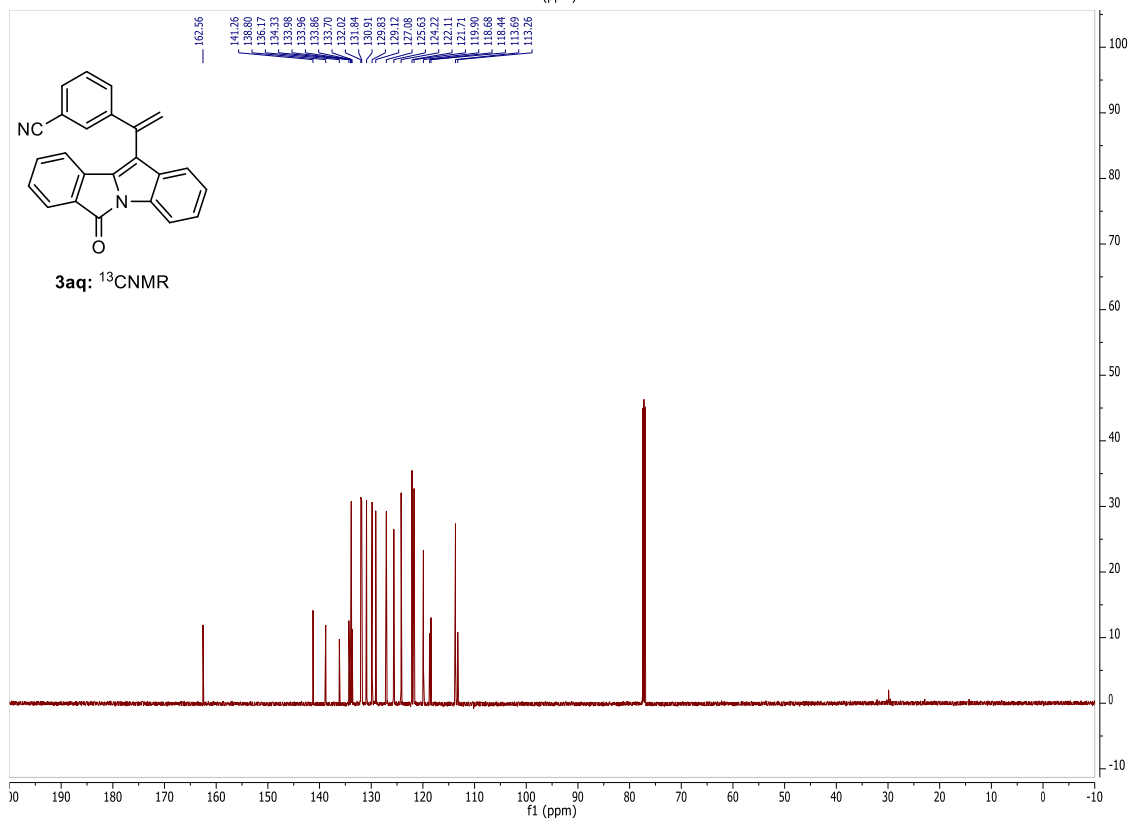



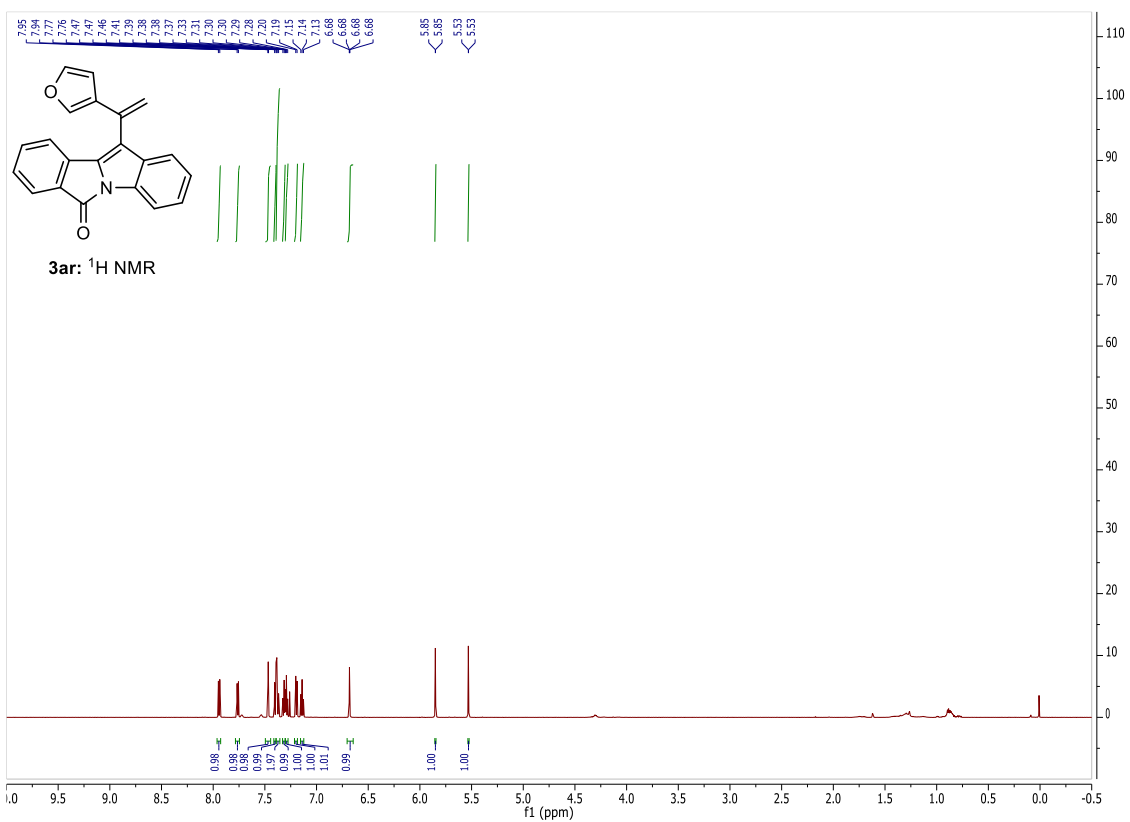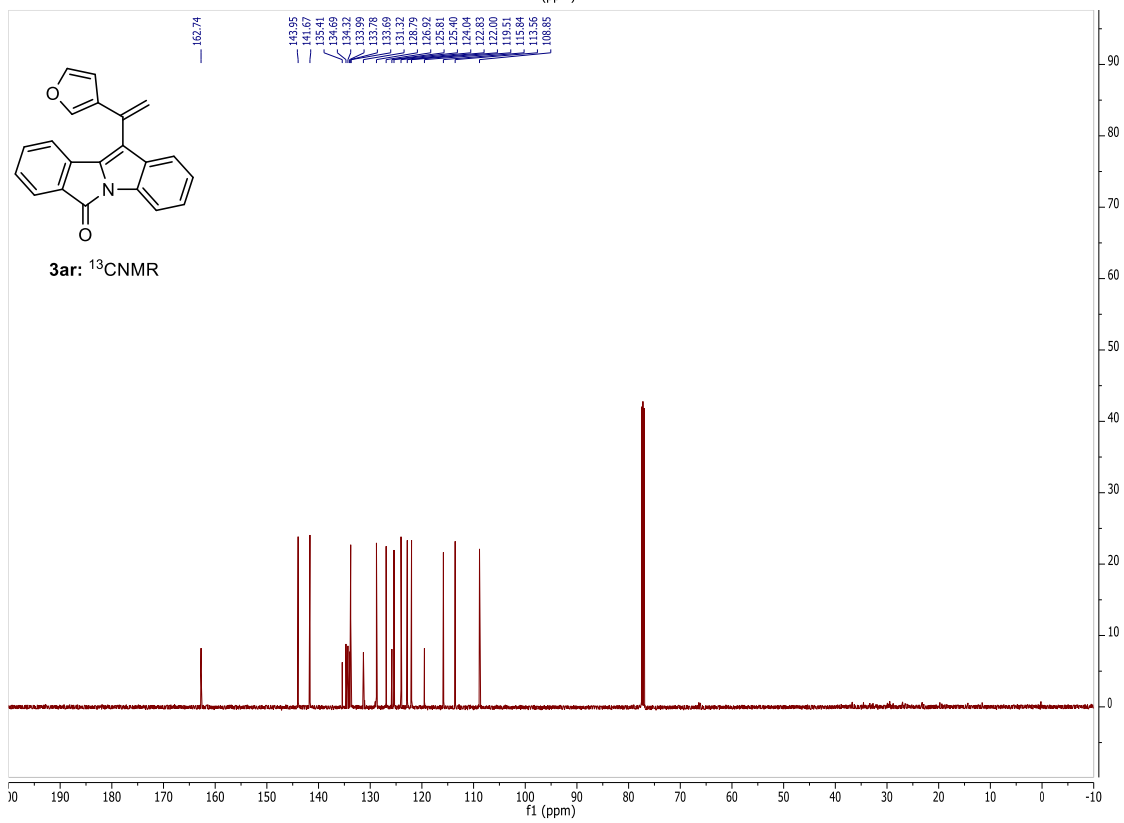

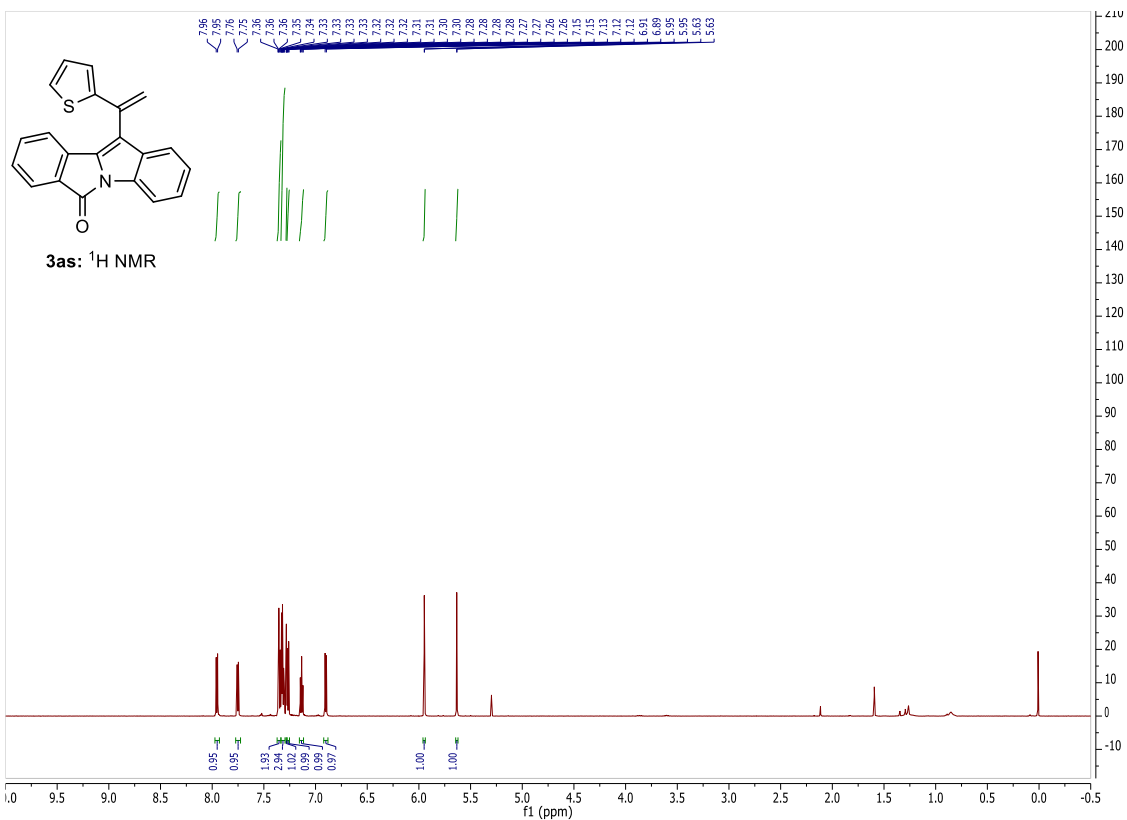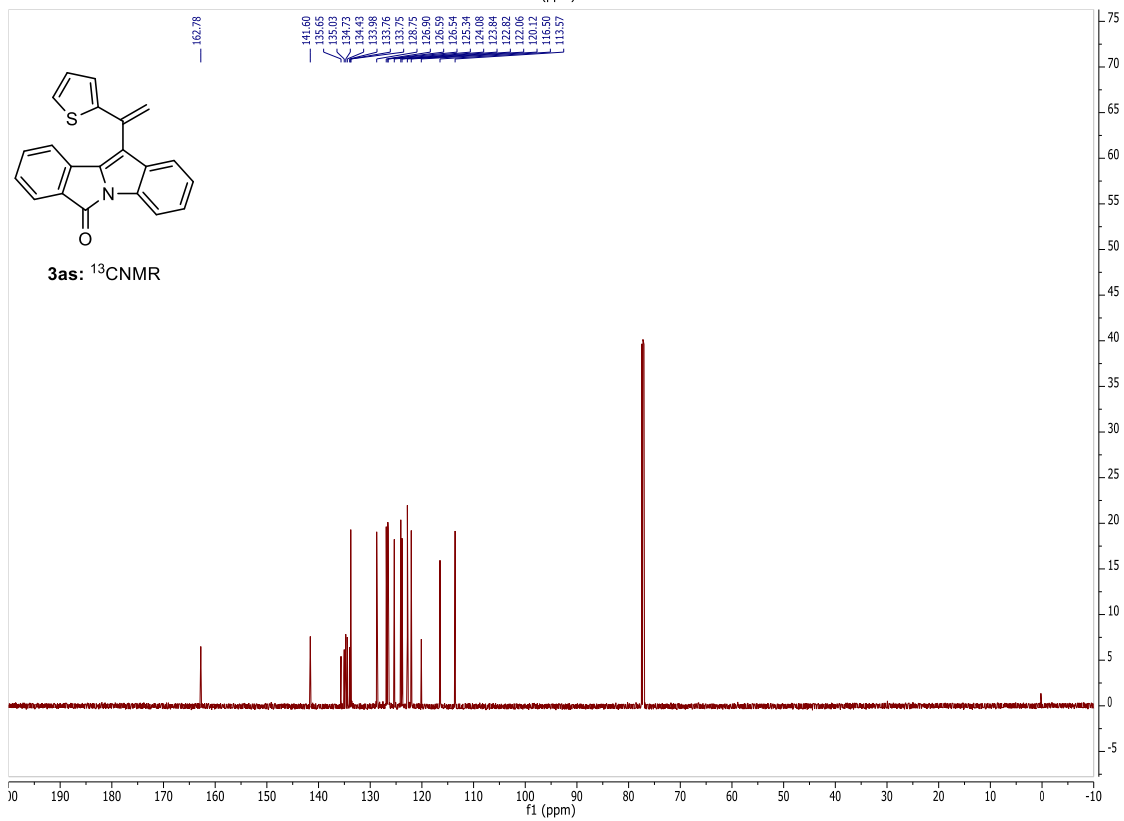

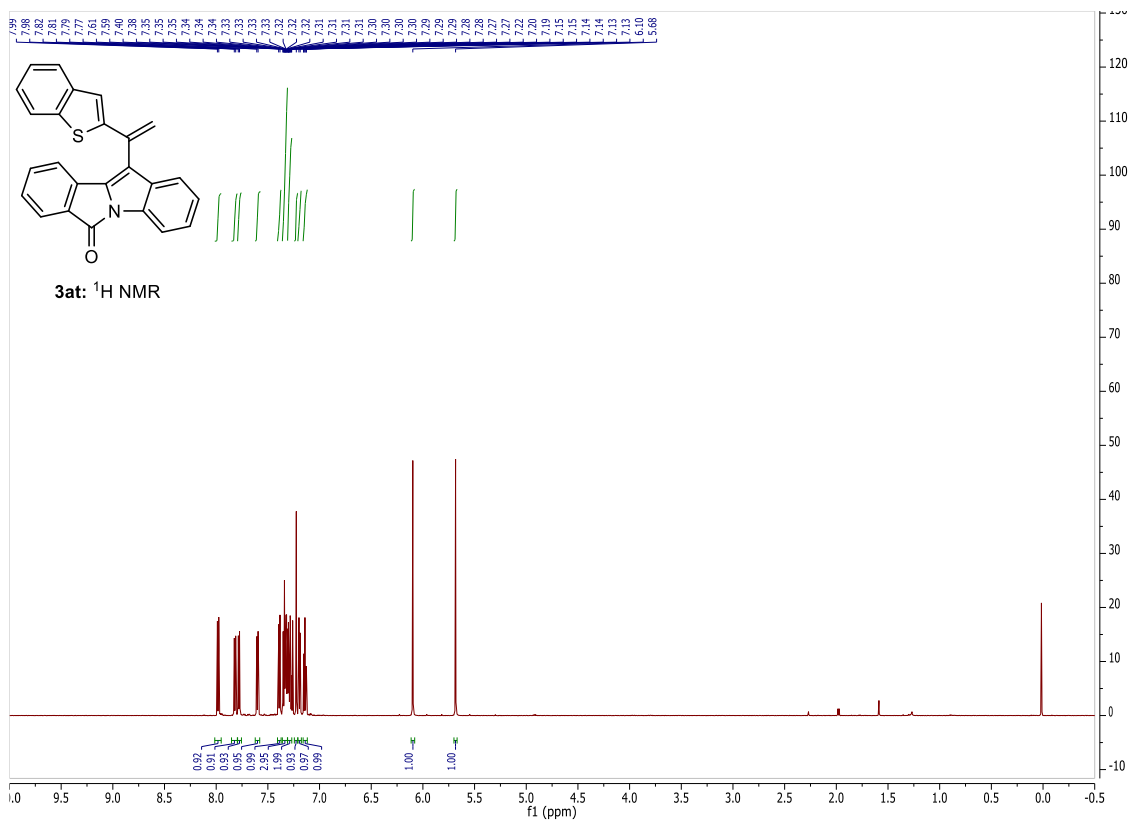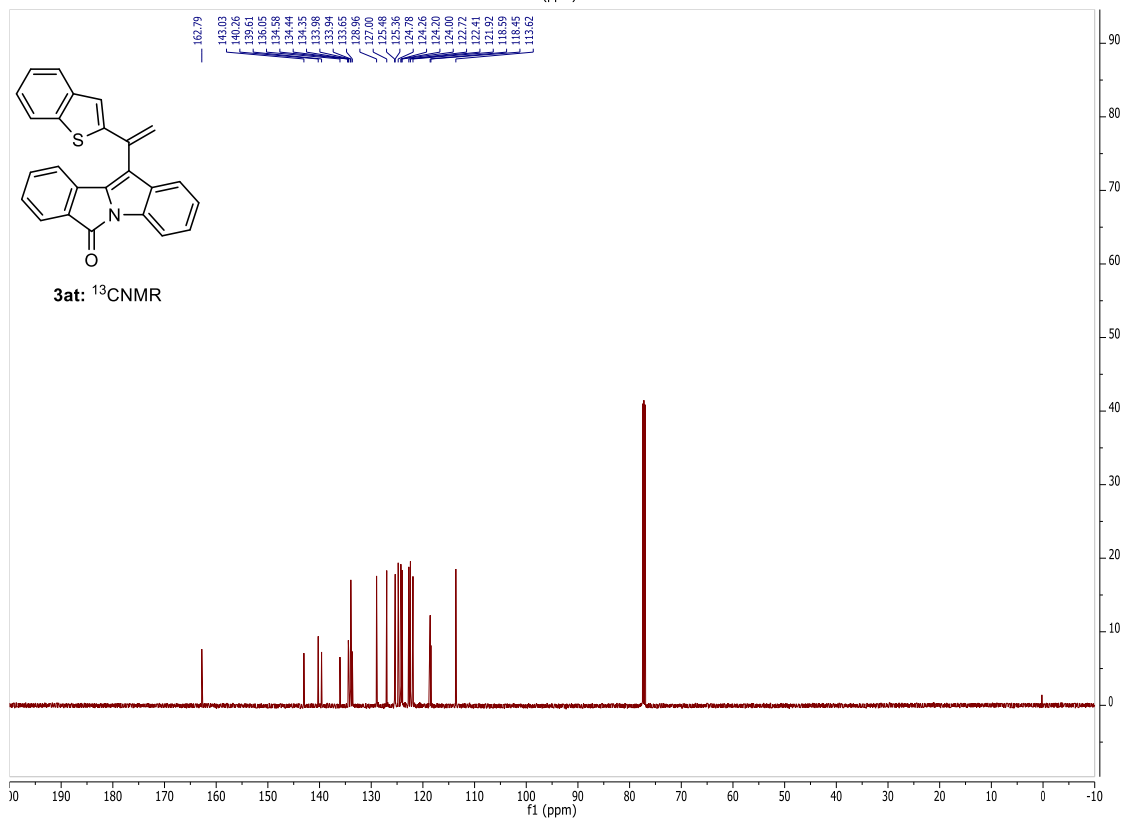

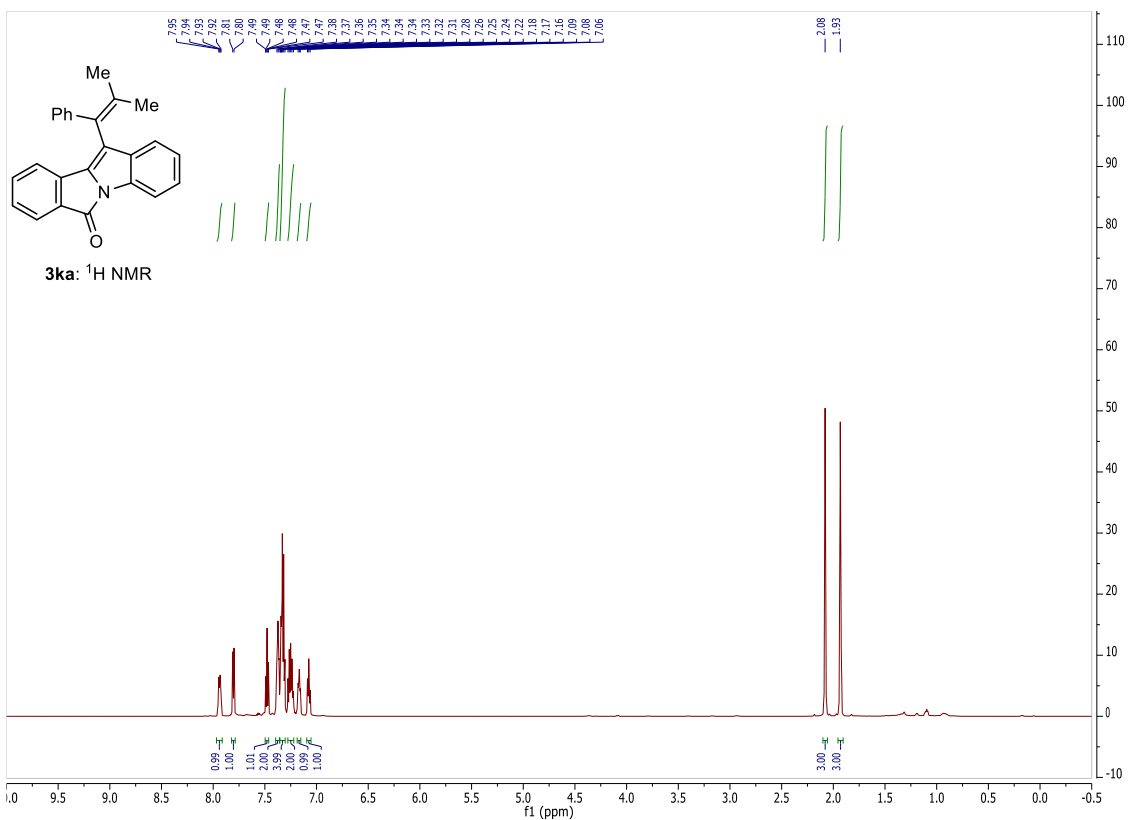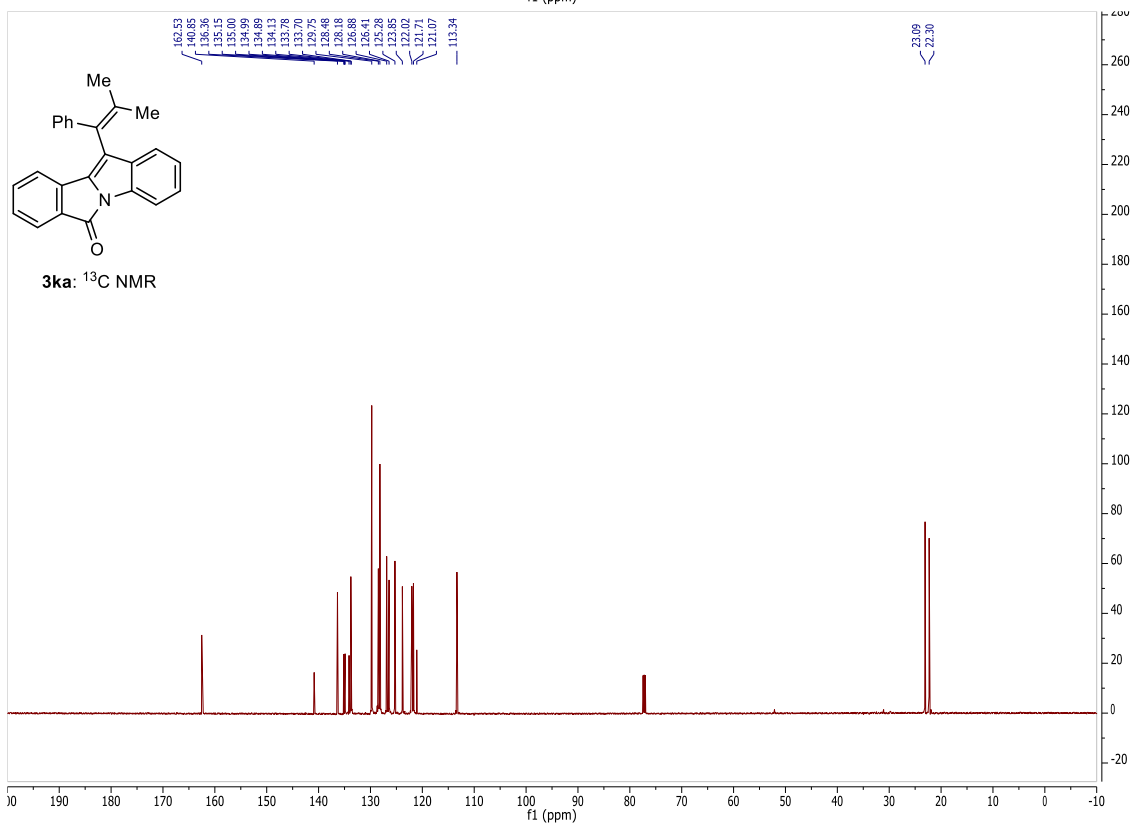



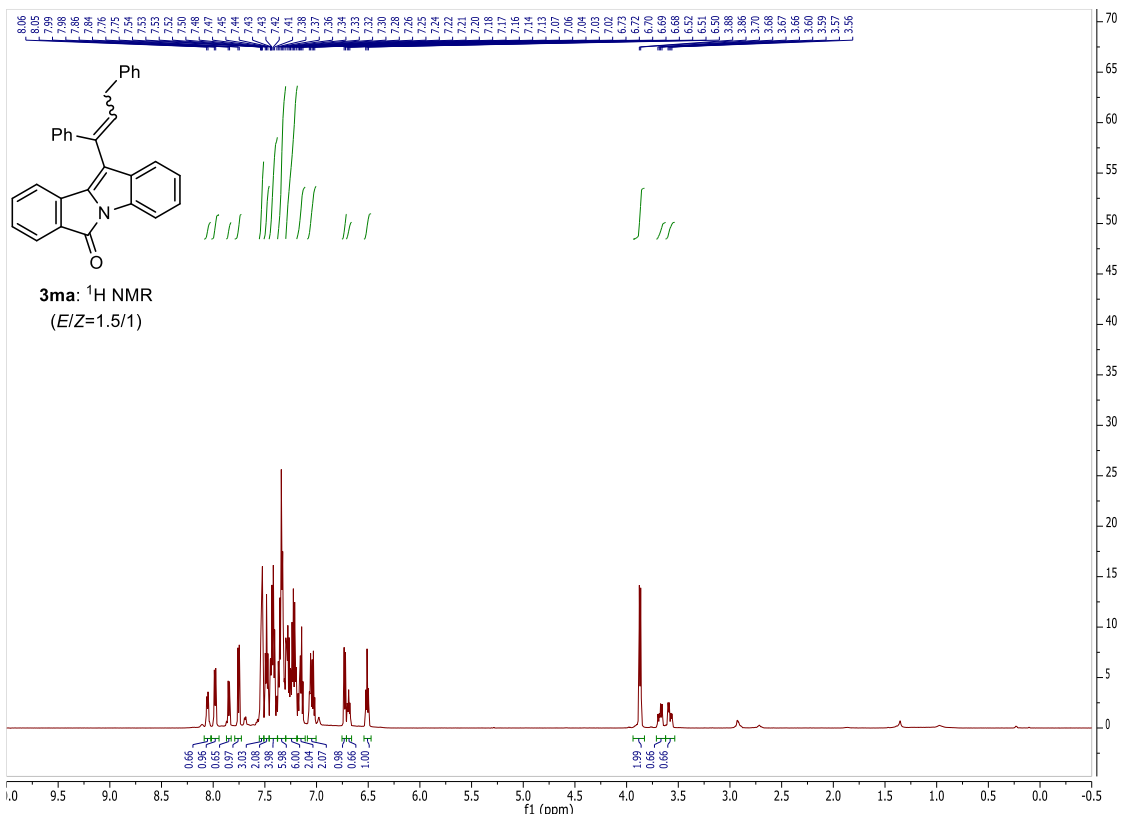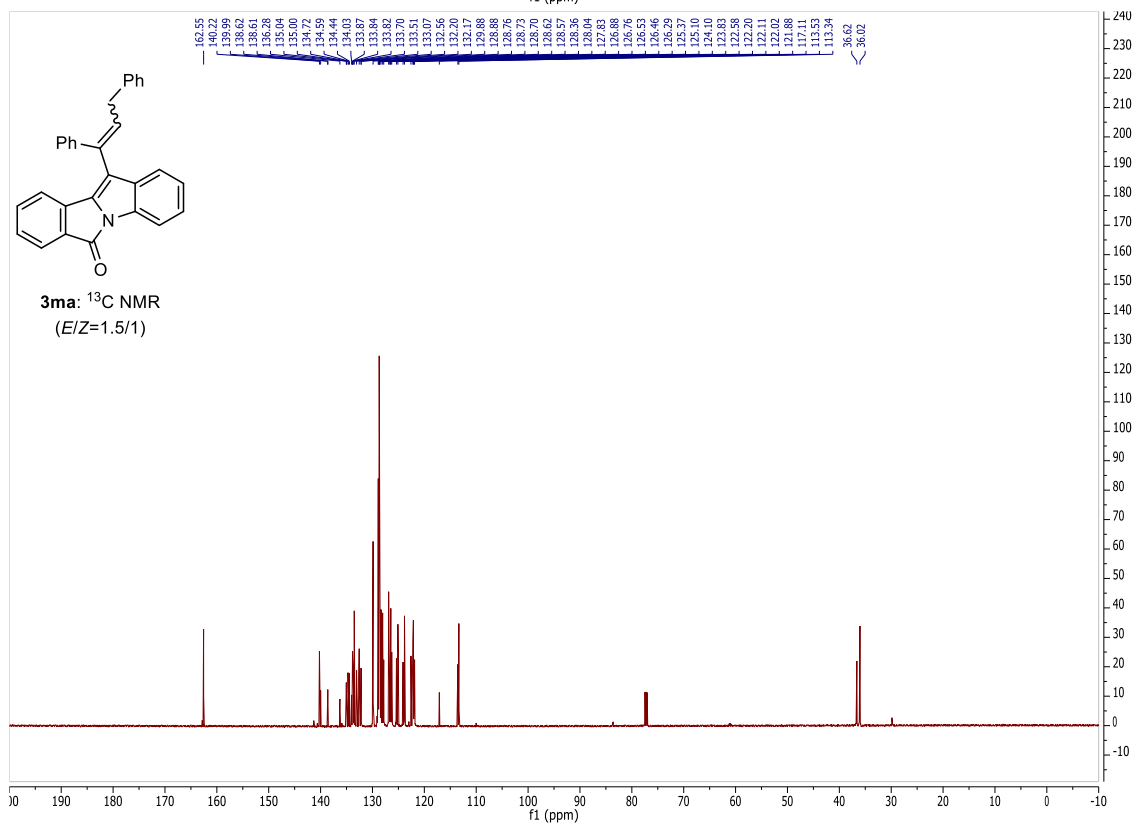

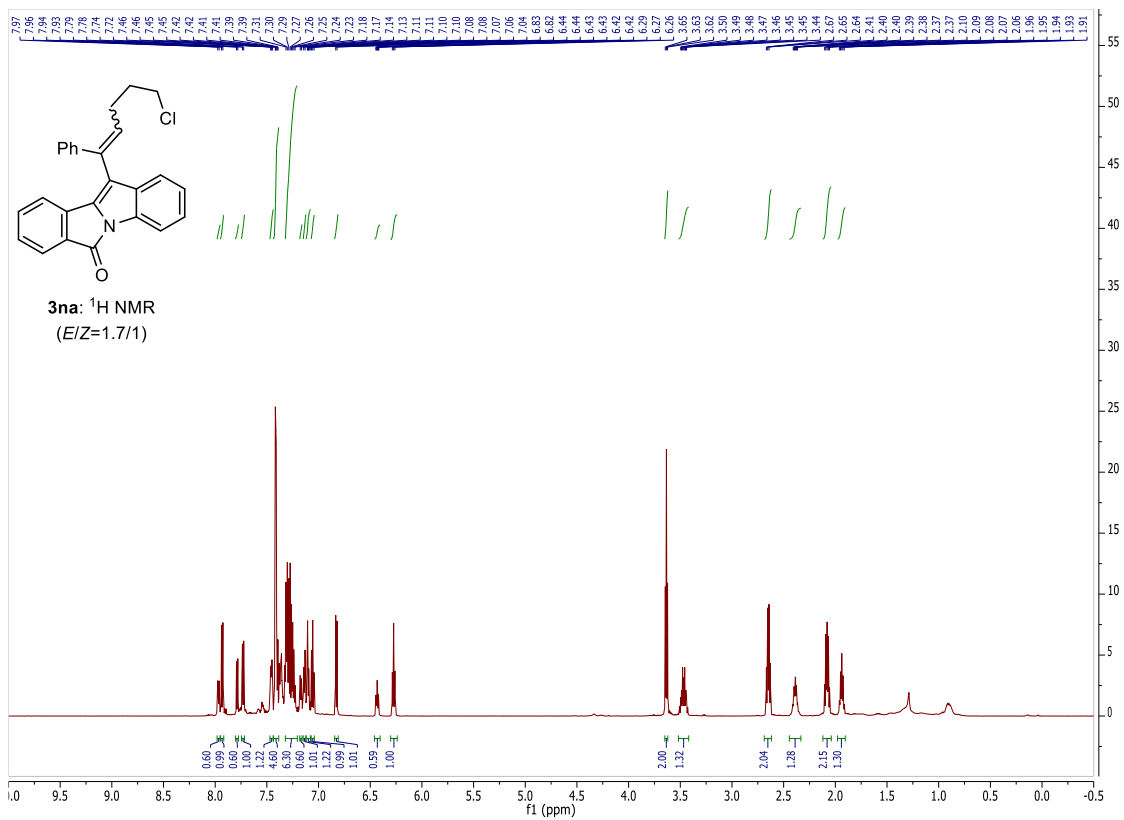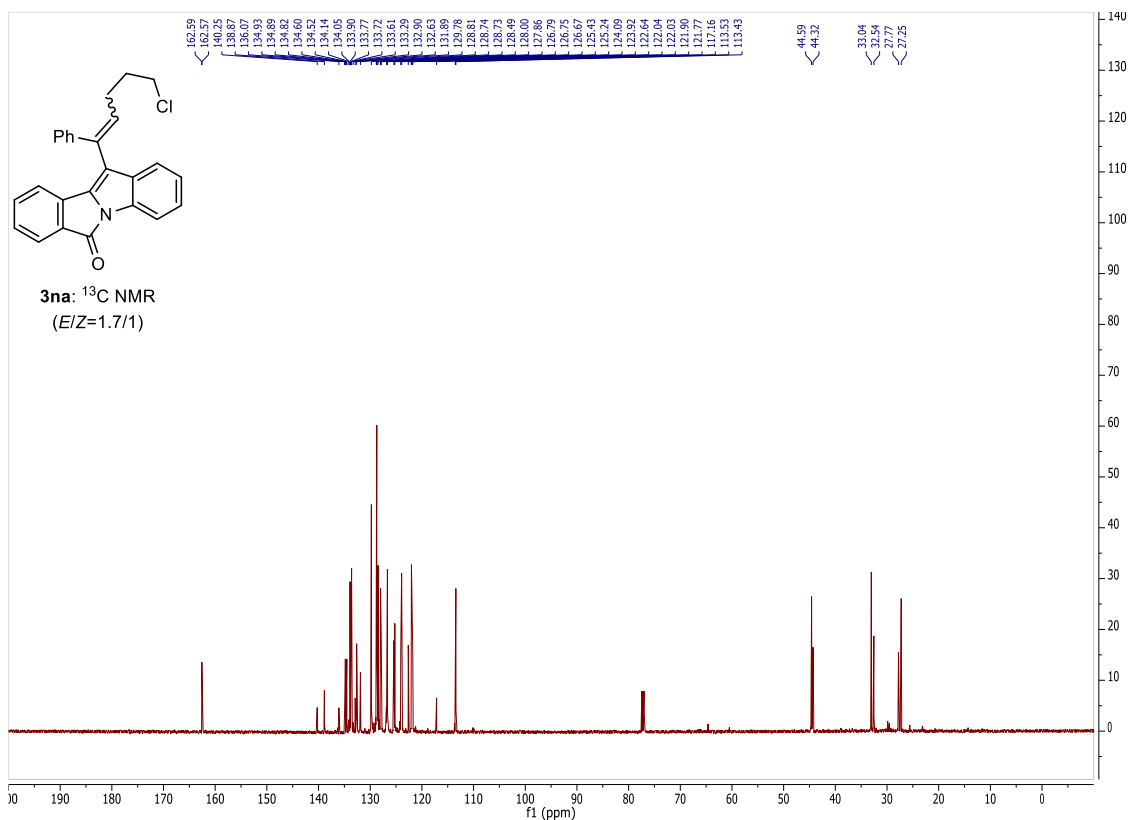

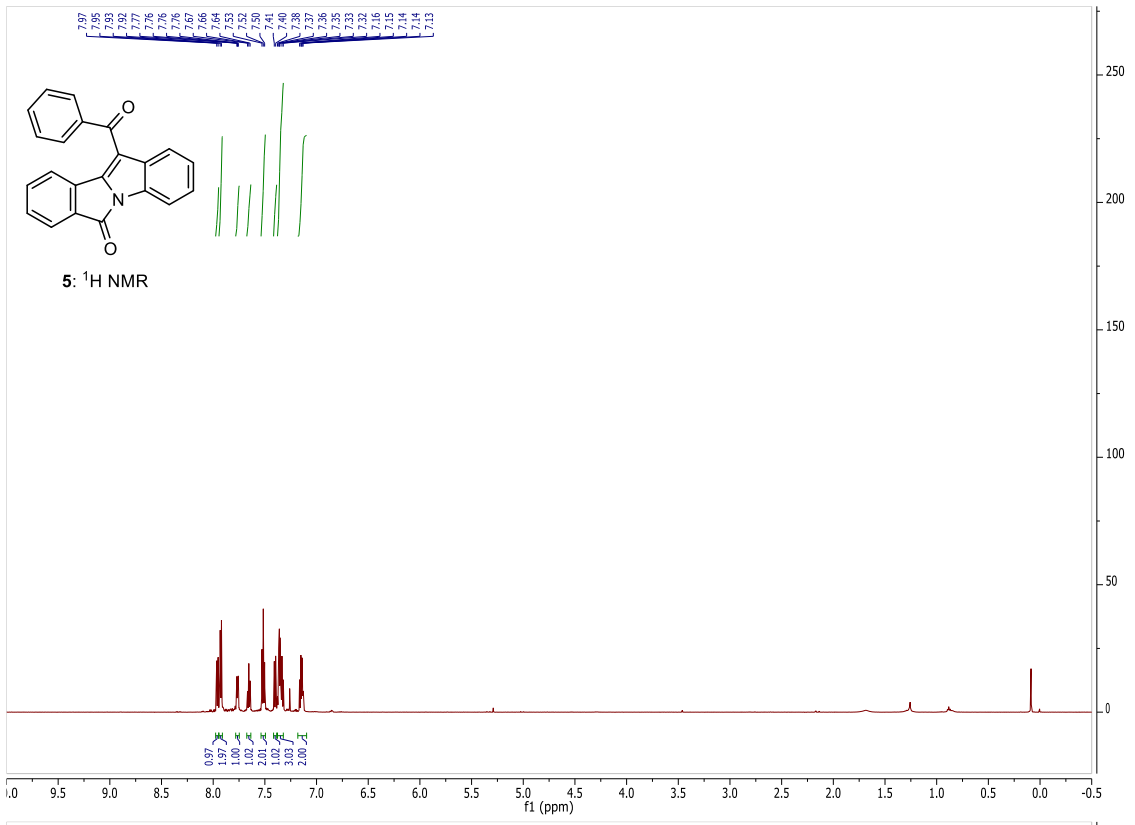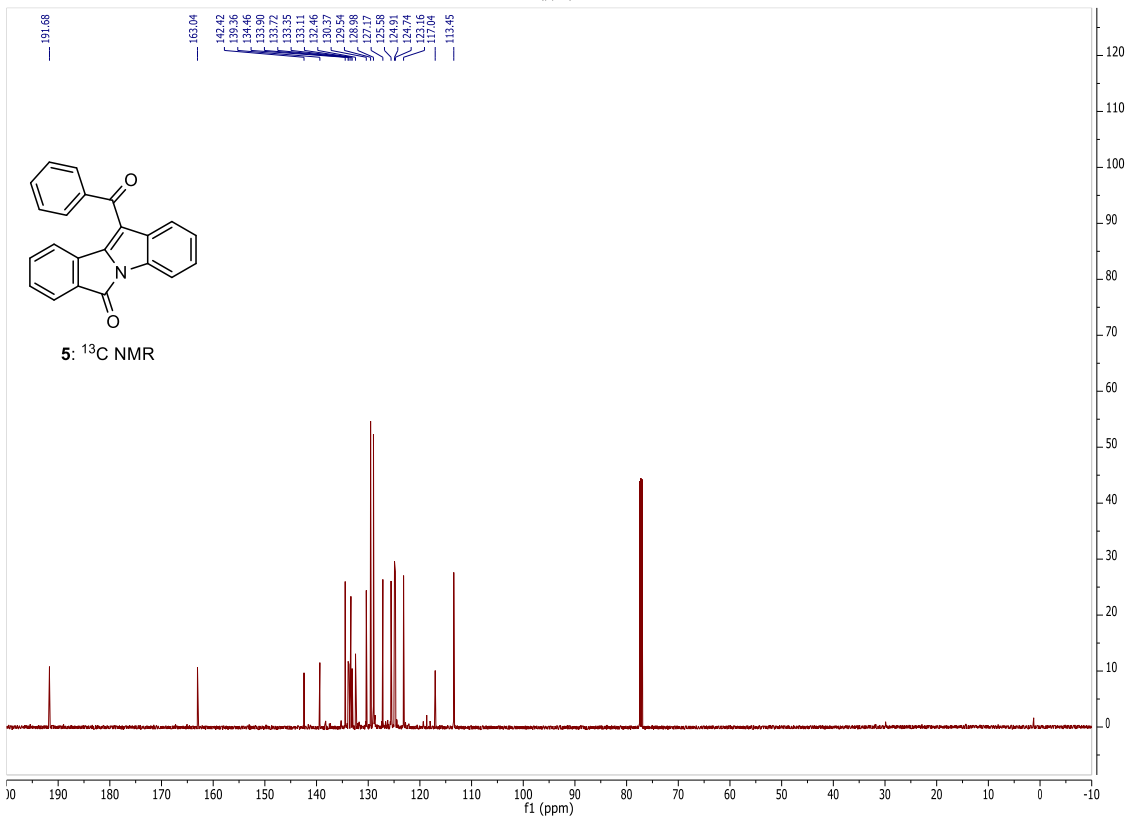



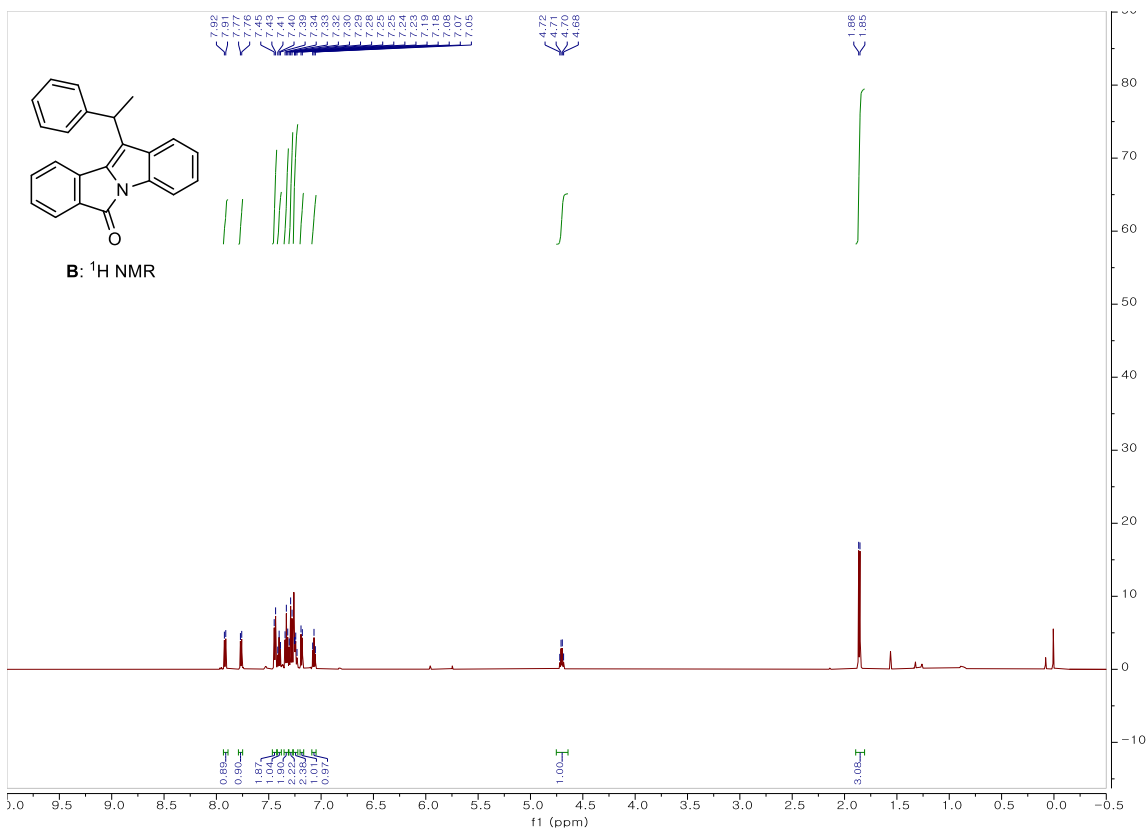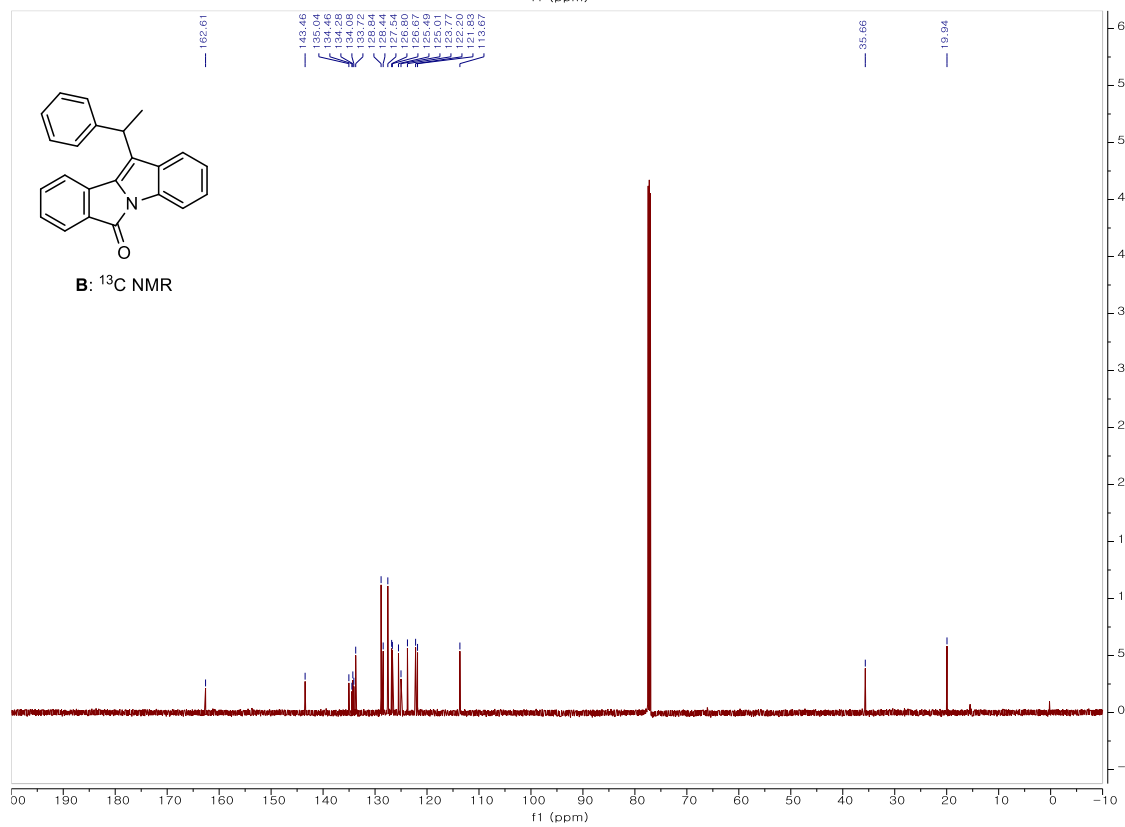

Supplement: d2gc00542e1.pdf [file d2gc00542e1.pdf]
